# Supplementary material for: A Resource for the Transcriptional Signature of Bona Fide Trophoblast Stem Cells and Analysis of Their Embryonic Persistence
Source: Stem Cells Int. 2015 Dec 14;2015:218518. doi: 10.1155/2015/218518 (PMC4691490; doi:10.1155/2015/218518)
Supplement: Supplementary file 1 — Supplementary Table S1: List of antibodies used for immunofluorescence and western blotting at indicated dilutions. Supplementary Table S2: List of primers used for qPCR and to generate in situ riboprobes. Restriction sites attached to the primers to ensure directed cloning of the PCR product are underlined. Supplementary Table S3: Gene expression array data sets. Supplementary Table S4: Gene groups of Venn diagram intersections. [file 218518.f1.zip]

Archive with 4 entries (3 files):
- 218518.f1/
- 218518.f1/Supp. mat.docx
- 218518.f1/Supplementary_Table_S3_SCI_1416411.xlsx
- 218518.f1/Supplementary_Table_S4_SCI_1416412.xlsx
