# Supplementary material for: A Resource for the Transcriptional Signature of Bona Fide Trophoblast Stem Cells and Analysis of Their Embryonic Persistence
Source: Stem Cells Int. 2015 Dec 14;2015:218518. doi: 10.1155/2015/218518 (PMC4691490; doi:10.1155/2015/218518)
Supplement: Supplementary file 1 — Supplementary Table S1: List of antibodies used for immunofluorescence and western blotting at indicated dilutions. Supplementary Table S2: List of primers used for qPCR and to generate in situ riboprobes. Restriction sites attached to the primers to ensure directed cloning of the PCR product are underlined. Supplementary Table S3: Gene expression array data sets. Supplementary Table S4: Gene groups of Venn diagram intersections. [file 218518.f1.zip › 218518.f1/Supplementary_Table_S3_SCI_1416411.xlsx]

## Sheet: ANOVA Results
unigene	gene_assignment	RefSeq	Gene Symbol	Median TSC	Median ESC	Median-TSC/Median-ESC	p-value(FACS 3d vs. FACS 0d)	FACS_fold-change(FACS 3d vs. FACS 0d)	p-value(FACS 2d vs. FACS 0d)	FACS_fold-change(FACS 2d vs. FACS 0d)	p-value(FACS 1d vs. FACS 0d)	FACS_fold-change(FACS 1d vs. FACS 0d)	p-value(EoCA/CA 3d vs. EoCA/CA 0d)	EoCA/CA_fold-change(EoCA/CA 3d vs. EoCA/CA 0d)	p-value(EoCA/CA 2d vs. EoCA/CA 0d)	EoCA/CA_fold-change(EoCA/CA 2d vs. EoCA/CA 0d)	p-value(EoCA/CA 1d vs. EoCA/CA 0d)	EoCA/CA_fold-change(EoCA/CA 1d vs. EoCA/CA 0d)	p-value(EoCA/CA 3d vs. EoCA/+ 3d)	EoCA/CA-EoCA/+_fold-change(EoCA/CA 3d vs. EoCA/+ 3d)	p-value(EoCA/CA 2d vs. EoCA/+ 2d)	EoCA/CA-EoCA/+_fold-change(EoCA/CA 2d vs. EoCA/+ 2d)	p-value(EoCA/CA 1d vs. EoCA/+ 1d)	EoCA/CA-EoCA/+_fold-change(EoCA/CA 1d vs. EoCA/+ 1d)	p-value(EoCA/CA 0d vs. EoCA/+ 0d)	EoCA/CA-EoCA/+_fold-change(EoCA/CA 0d vs. EoCA/+ 0d)	p-value(ESC-Cdx2 2d vs. ESC-Cdx2 0d)	Cdx2_fold-change(ESC-Cdx2 2d vs. ESC-Cdx2 0d)	p-value(ESC-Cdx2 1d vs. ESC-Cdx2 0d)	Cdx2_fold-change(ESC-Cdx2 1d vs. ESC-Cdx2 0d)	p-value(ESC-Cdx2 2d vs. ESC-Cre * 2_d)	Cdx2-Cre_fold-change(ESC-Cdx2 2d vs. ESC-Cre 2d)	p-value(ESC-Cdx2 1d vs. ESC-Cre 1d)	Cdx2-Cre_fold-change(ESC-Cdx2 1d vs. ESC-cre 1d)	p-value(ESC-Cdx2 0d vs. ESC-Cre 0d)	Cdx2-Cre_fold-change(ESC-Cdx2 0d vs. ESC-cre 0d)	p-value(ESC-Eomes 2d vs. ESC-Eomes 0d)	Eomes_fold-change(ESC-Eomes 2d vs. ESC-Eomes 0d)	p-value(ESC-Eomes 1d vs. ESC-Eomes 0d)	Eomes_fold-change(ESC-Eomes 1d vs. ESC-Eomes 0d)	p-value(ESC-Eomes 2d vs. ESC-Cre 2d)	Eomes-Cre_fold-change(ESC-Eomes 2d vs. ESC-Cre 2d)	p-value(ESC-Eomes 1d vs. ESC-Cre 1d)	Eomes-Cre_fold-change(ESC-Eomes 1d vs. ESC-Cre 1d)	p-value(ESC-Eomes 0d vs. ESC-cre 0d)	Eomes-Cre_fold-change(ESC-Eomes 0d vs. ESC-Cre 0d)
ENSMUST00000053734 // Mm.358846 // pancreas| salivary gland| thymus| neonate /// NM_177	ENSMUST00000053734 // Duox2 // dual oxidase 2 // 2 E5|2 // 214593 /// NM_177610 // Duox	ENSMUST00000053734	Duox2	198.523	21.4795	9.24242	8.43312e-34	-98.4182	3.09416e-24	-12.775	1.31089e-05	-1.7405	5.57895e-16	-4.34254	8.86345e-11	-2.65416	0.0393133	-1.2675	3.66687e-26	-17.7299	7.73483e-25	-14.1007	6.73338e-22	-8.96589	5.47629e-19	-6.10964	0.748596	-1.03653	0.787354	1.03065	0.881153	-1.01687	0.969489	1.00429	0.540757	1.071	0.493527	-1.09017	0.948311	1.00818	0.469548	-1.08457	0.776569	-1.03227	0.664447	1.05611
NM_007706 // Mm.474283 // brain| embryonic tissue| eye| inner ear| kidney| mammary glan	NM_007706 // Socs2 // suppressor of cytokine signaling 2 // 10 C2|10 52.0 cM // 216233	NM_007706	Socs2	3273.58	4813.26	0.680116	9.24616e-39	-91.3448	1.10928e-33	-27.8828	2.45228e-20	-4.24835	3.07923e-09	-1.85622	0.0955758	-1.14875	0.143136	1.12899	7.24619e-09	-1.81537	0.00286065	-1.29489	0.0163325	-1.22603	0.00220051	-1.30496	0.00483349	-1.27459	0.00445395	-1.27777	0.951523	-1.00498	0.748636	-1.02655	0.803351	1.02056	0.707395	-1.0351	0.100566	-1.16584	0.0702307	1.16315	0.869307	1.01354	0.730266	-1.03219
NM_026268 // Mm.1791 // adrenal gland| bladder| bone| bone marrow| brain| connective ti	NM_026268 // Dusp6 // dual specificity phosphatase 6 // 10|10 C3 // 67603 /// ENSMUST00	NM_026268	Dusp6	2100.35	1936.72	1.08449	7.98613e-38	-60.665	2.20752e-30	-13.7353	2.65687e-10	-1.92933	8.07266e-15	-2.57992	5.58457e-07	-1.59464	0.0835798	-1.14873	8.37456e-14	-2.40576	1.62982e-07	-1.64334	0.00608418	-1.25423	0.00206757	-1.294	0.487647	1.05624	0.00460364	1.26462	0.629568	1.03869	0.864157	-1.01354	0.0669486	-1.15853	0.108357	1.15508	0.236232	1.11131	0.189384	1.10993	0.0401169	-1.18034	0.0595223	-1.18564
NM_007430 // Mm.5180 // bladder| brain| embryonic tissue| eye| testis| fetus| adult ///	NM_007430 // Nr0b1 // nuclear receptor subfamily 0, group B, member 1 // X C1|X 33.0 cM	NM_007430	Nr0b1	2094.62	5387.13	0.388819	2.88971e-34	-55.9039	2.82028e-29	-19.5215	2.5602e-12	-2.57947	2.22484e-09	-2.07892	0.130453	-1.15765	0.191541	1.13422	7.87794e-12	-2.48509	0.000205441	-1.4742	0.00296457	-1.35038	3.08754e-05	-1.56294	0.434451	-1.07771	0.434449	1.07771	0.163259	1.14414	0.00270032	1.35476	0.184239	1.13666	0.91571	1.01141	0.280604	-1.12355	0.0195636	1.25954	0.204789	1.12998	0.202535	1.14798
NM_183103 // Mm.87419 // testis| adult /// ENSMUST00000176403 // Mm.87419 // testis| ad	NM_183103 // Prss46 // protease, serine, 46 // 9 F3|9 63.98 cM // 74306 /// ENSMUST0000	NM_183103	Prss46	130.761	31.7138	4.12314	1.29529e-25	-52.0576	1.28693e-23	-32.597	4.83629e-09	-3.26007	2.57652e-11	-4.28263	0.000352515	-1.85723	0.0410969	-1.39659	0.000223409	-1.90261	0.00610102	-1.58179	0.71871	-1.05904	0.295485	-1.18255	0.402812	1.1431	0.0243015	1.44852	0.399118	1.14431	0.00122422	1.7357	0.475464	1.12068	0.679941	1.07664	0.464518	1.14024	0.950361	1.00996	0.126186	1.28032	0.784435	1.05015
NM_025777 // Mm.171333 // embryonic tissue| intestine| joint| mammary gland| salivary g	NM_025777 // Duoxa2 // dual oxidase maturation factor 2 // 2 E5|2 // 66811 /// ENSMUST0	NM_025777	Duoxa2	944.077	37.6793	25.0556	3.85266e-30	-50.2806	1.94773e-21	-9.67123	0.00700297	-1.40124	1.71783e-15	-4.53154	4.69308e-10	-2.65142	0.0662269	-1.25099	4.74355e-10	-2.65032	4.56218e-08	-2.22818	0.135614	-1.19789	0.294978	-1.13404	0.134205	-1.1987	0.569046	-1.07042	0.983692	-1.00244	0.0992167	1.22155	0.162775	1.18362	0.0230679	-1.37019	0.703668	-1.05234	0.457144	-1.09307	0.0315231	1.30255	0.113203	1.24078
NM_008370 // Mm.3448 // lymph node| juvenile| adult /// ENSMUST00000005497 // Mm.3448 /	NM_008370 // Il5ra // interleukin 5 receptor, alpha // 6 E1|6 46.0 cM // 16192 /// ENSM	NM_008370	Il5ra	292.284	28.3022	10.3273	8.42566e-26	-50.0681	1.19121e-24	-38.1139	3.67421e-10	-3.61776	3.16172e-14	-6.02977	3.68309e-08	-2.87696	0.0718286	-1.33156	3.12794e-06	-2.31954	0.000185192	-1.89481	0.136258	-1.26542	0.465129	1.12092	0.851807	1.02953	0.806923	1.03881	0.704251	1.06096	0.580635	1.09003	0.810401	1.03808	0.277417	-1.21109	0.433089	-1.14766	0.838229	-1.03232	0.797104	1.04087	0.342655	1.18179
NM_010738 // Mm.425949 // blood| bone marrow| brain| connective tissue| embryonic tissu	NM_010738 // Ly6a // lymphocyte antigen 6 complex, locus A // 15 D3|15 42.7 cM // 11045	NM_010738	Ly6a	2982.94	460.89	6.47213	1.15854e-23	-47.6786	8.42341e-15	-8.32839	0.00154377	-1.81391	0.16871	-1.27792	0.429223	1.14992	0.247538	1.22788	0.113776	-1.32697	0.728614	-1.06302	0.217446	-1.2451	0.896497	-1.02316	1.62229e-08	3.45392	0.914467	-1.01908	1.56807e-11	5.14663	0.000805123	1.88774	0.759642	-1.05536	0.000459712	-2.1205	0.000473848	-2.11622	0.127929	-1.31258	0.934244	-1.01463	0.891619	1.02731
NM_007811 // Mm.42230 // embryonic tissue| eye| inner ear| liver| egg cylinder| gastrul	NM_007811 // Cyp26a1 // cytochrome P450, family 26, subfamily a, polypeptide 1 // 19|19	NM_007811	Cyp26a1	247.32	29.948	8.2583	1.20768e-26	-45.0694	1.94447e-25	-34.1836	5.79099e-14	-5.08362	8.51835e-08	-2.5547	0.072151	-1.30221	0.458873	-1.1128	7.17664e-17	-7.46852	5.75588e-13	-4.50348	1.21512e-11	-3.86138	1.43103e-10	-3.42717	0.0116525	1.45961	0.114746	1.25921	0.329097	1.15165	0.536377	1.09321	0.522004	-1.0967	0.00403581	1.63323	0.0129306	1.51923	0.0797507	1.29308	0.0569429	1.3235	0.583032	-1.09293
NM_013526 // Mm.302555 // lymph node| pancreas| juvenile /// ENSMUST00000057613 // Mm.3	NM_013526 // Gdf6 // growth differentiation factor 6 // 4 A1|4 // 242316 /// ENSMUST000	NM_013526	Gdf6	877.836	26.9548	32.567	8.80212e-32	-39.6916	1.32187e-26	-14.5707	1.11704e-10	-2.40354	0.00647218	1.33629	0.0248612	1.26505	0.145749	1.16131	1.14724e-05	-1.65955	2.71745e-05	-1.61432	0.00358493	-1.36659	1.27458e-05	-1.65398	0.576699	1.05835	0.00814462	1.32437	0.16785	-1.1521	0.00312626	1.37356	0.599049	1.05486	0.557193	-1.06933	0.622196	1.05784	0.0944937	-1.18847	0.0734272	1.20364	0.20455	1.15727
NM_008384 // Mm.917 // bone| bone marrow| brain| embryonic tissue| eye| inner ear| inte	NM_008384 // Inpp1 // inositol polyphosphate-1-phosphatase // 1 C1.1|1 27.1 cM // 16329	NM_008384	Inpp1	957.236	72.3259	13.235	2.01397e-30	-36.0048	8.95068e-26	-14.7315	9.97779e-11	-2.53804	8.86138e-12	-2.77085	2.08442e-06	-1.80913	0.0106947	-1.33065	1.17707e-06	-1.84394	0.000608202	-1.48796	0.00445108	-1.37946	0.262923	-1.12865	4.25757e-07	1.90747	0.0528832	1.23704	6.6158e-09	2.19371	4.1766e-05	1.6352	0.627277	1.05353	0.8534	1.02252	0.0772242	-1.24269	0.674613	1.0461	0.607043	-1.0568	0.591003	-1.06702
NM_029070 // Mm.159318 // eye| stomach| testis| adult /// ENSMUST00000023400 // Mm.1593	NM_029070 // Cldn26 // claudin 26 // 16|16 A3 // 74720 /// ENSMUST00000023400 // Cldn26	NM_029070	Cldn26	1413.21	25.9492	54.4604	1.95675e-29	-34.007	8.66575e-16	-4.26815	0.479054	-1.08285	9.21426e-16	-4.25625	1.23193e-08	-2.22365	0.951184	1.00689	6.78605e-17	-4.80727	1.2995e-11	-2.85943	0.0935057	-1.21103	0.0388161	-1.26889	0.00103495	1.48429	0.233885	1.14415	3.57874e-05	1.68133	0.00651899	1.37734	0.3985	1.09974	0.392352	-1.11431	0.713599	-1.04735	0.77149	1.03311	0.170851	1.16811	0.379494	1.11766
NM_007554 // Mm.6813 // bladder| bone| bone marrow| embryonic tissue| extraembryonic ti	NM_007554 // Bmp4 // bone morphogenetic protein 4 // 14 C1|14 15.0 cM // 12159 /// ENSM	NM_007554	Bmp4	2446.16	1751.04	1.39697	3.4961e-32	-30.3794	5.08238e-24	-7.85741	8.28061e-08	-1.82113	0.855002	-1.01692	0.726582	1.03264	0.23302	1.1168	6.31315e-05	-1.5049	0.000426147	-1.42073	0.147037	-1.14443	0.00208953	-1.35072	1.45995e-08	-1.91437	2.76754e-08	-1.87935	0.386286	-1.08318	7.09292e-05	-1.49973	0.271936	1.10696	0.0524381	-1.22749	0.34452	-1.10301	0.00154514	1.36408	0.42469	1.07634	0.644964	1.04873
NM_023794 // Mm.155708 // bladder| bone| bone marrow| brain| connective tissue| dorsal	NM_023794 // Etv5 // ets variant gene 5 // 16 B1|16 // 104156 /// ENSMUST00000079601 //	NM_023794	Etv5	709.935	1882.32	0.377158	4.77388e-33	-28.3275	2.03506e-27	-10.702	6.99864e-14	-2.6082	0.0254708	1.21765	0.000296921	1.40038	0.000264877	1.40493	6.3979e-07	-1.65361	1.13411e-05	-1.53183	6.08172e-06	-1.55759	8.97877e-09	-1.85285	0.0375463	-1.20022	0.0826395	-1.16299	0.00669029	1.27483	0.590032	1.04712	0.275544	1.09827	0.0530358	-1.20928	0.632064	-1.04704	0.000577316	1.37392	0.00889008	1.26295	0.0720186	1.19257
NM_024285 // Mm.332793 // bladder| brain| embryonic tissue| eye| heart| muscle| ovary|	NM_024285 // Bves // blood vessel epicardial substance // 10 B2|10 29.0 cM // 23828 ///	NM_024285	Bves	1784.83	126.65	14.0927	1.26064e-27	-28.1154	3.17792e-18	-6.1759	0.000304572	-1.59504	1.72235e-05	-1.7806	0.0490197	-1.27036	0.248543	-1.14793	0.00147189	-1.49637	0.418392	-1.10112	0.117786	-1.20729	0.961443	1.00575	1.34314e-19	7.37304	5.15013e-19	6.82817	2.44114e-16	4.93492	1.14305e-15	4.57818	0.0905893	-1.22675	0.626723	-1.06702	0.356626	1.13139	0.000840441	-1.53138	0.0519606	-1.26632	0.222163	-1.17841
NM_001033458 // Mm.4923 // blood| brain| embryonic tissue| extraembryonic tissue| eye|	NM_001033458 // Gm1673 // predicted gene 1673 // 5 B2|5 // 381633 /// ENSMUST0000009486	NM_001033458	Gm1673	484.487	46.1149	10.5061	1.06919e-24	-26.7803	2.8219e-17	-7.51865	2.46547e-05	-1.94767	0.00166974	-1.6009	0.246059	-1.17832	0.536778	1.09071	0.0537634	-1.31931	0.389908	-1.12879	0.767992	1.04226	0.0200756	-1.40182	1.15475e-11	3.74355	2.75235e-12	4.01369	8.70314e-09	2.75981	5.11994e-15	5.56283	0.782711	1.03945	0.00097589	-1.74781	0.207459	-1.22223	3.72737e-05	-1.91209	0.0190736	1.40601	0.113133	1.28882
NM_028804 // Mm.274715 // bladder| brain| connective tissue| dorsal root ganglion| embr	NM_028804 // Ccdc3 // coiled-coil domain containing 3 // 2 A1|2 // 74186 /// ENSMUST000	NM_028804	Ccdc3	779.02	435.691	1.78801	5.19278e-23	-25.0957	4.44855e-17	-8.76668	3.52944e-07	-2.53539	0.345194	1.15634	0.0624472	1.33855	0.0402284	1.38073	0.142247	1.2557	0.0175429	1.45803	0.0640938	1.33601	0.526514	1.10203	1.64296e-07	-2.62932	2.63953e-08	-2.86947	0.352112	1.15392	0.00282043	-1.62365	0.00709006	1.54047	0.0426677	-1.43038	0.429703	-1.14603	9.40587e-05	1.93811	0.0297779	1.40903	0.0523539	1.40754
NM_011443 // Mm.65396 // brain| dorsal root ganglion| embryonic tissue| eye| inner ear|	NM_011443 // Sox2 // SRY-box containing gene 2 // 3 A2-B|3 15.0 cM // 20674 /// ENSMUST	NM_011443	Sox2	2578.19	4917.47	0.524292	1.17128e-39	-23.7319	4.83209e-29	-5.30456	2.06271e-13	-1.80183	0.208762	-1.07143	0.0578488	1.11126	0.00990691	1.15762	4.9623e-12	-1.69423	2.11065e-08	-1.45953	1.25313e-06	-1.36201	8.24228e-08	-1.42609	0.259714	1.06368	0.873642	-1.00868	0.925795	-1.00507	0.3916	-1.04787	0.274203	1.06169	0.0707569	1.11927	0.112858	1.10338	0.49083	1.03826	0.342074	1.05329	0.400743	1.05288
NM_011898 // Mm.42038 // brain| embryonic tissue| eye| fertilized ovum| heart| kidney|	NM_011898 // Spry4 // sprouty homolog 4 (Drosophila) // 18 B3|18 18.0 cM // 24066 /// E	NM_011898	Spry4	1082.91	1854.1	0.584065	3.65146e-30	-19.6102	2.97155e-30	-19.9326	6.55662e-20	-4.74341	0.647876	-1.04224	0.231635	1.11541	0.00869313	1.28192	4.56039e-06	-1.61297	5.67026e-05	-1.50084	0.0457316	-1.20383	0.000571372	-1.40101	9.49112e-06	-1.57983	0.484475	-1.0655	0.666384	-1.03982	0.695121	1.03613	0.813503	1.02158	0.000506702	-1.4667	0.0477833	-1.22925	0.581911	1.05117	0.30817	-1.09726	0.723401	1.03666
NM_001001985 // Mm.274610 // adrenal gland| bone| brain| dorsal root ganglion| embryoni	NM_001001985 // Nat8l // N-acetyltransferase 8-like // 5 B2|5 // 269642 /// ENSMUST0000	NM_001001985	Nat8l	392.413	37.5294	10.4561	2.35742e-21	-18.1654	2.98447e-15	-6.73678	0.00125956	-1.69781	2.09913e-06	-2.33202	0.0538321	-1.35347	0.64412	1.07344	0.0308039	-1.40652	0.29633	-1.17485	0.88413	1.02258	0.00499625	-1.57305	1.09369e-06	2.40559	4.16555e-06	2.25693	4.53911e-07	2.50842	6.25646e-06	2.21339	0.520571	-1.10373	0.515427	1.11882	0.270926	1.21048	0.346228	1.15621	0.292164	1.17651	0.532677	-1.11369
NM_023746 // Mm.155058 // embryonic tissue| extraembryonic tissue| gastrula| adult ///	NM_023746 // Prl5a1 // prolactin family 5, subfamily a, member 1 // 13 A3.1|13 14.0 cM	NM_023746	Prl5a1	30.0908	20.9158	1.43866	1.08147e-21	-18.0822	1.34088e-22	-21.5331	2.08086e-14	-5.75506	2.73689e-06	-2.2583	7.0712e-06	-2.1603	0.00289504	-1.60415	0.061781	1.331	0.0186031	1.44075	0.000319535	1.79862	7.82146e-06	2.15011	0.879898	1.02287	0.717133	1.05576	0.817092	-1.03523	0.315419	1.16324	0.717017	1.05578	0.469684	1.12972	0.427616	1.1433	0.77345	-1.04404	0.412976	1.13092	0.750246	-1.05501
NM_145375 // Mm.221412 // adipose tissue| bone| bone marrow| brain| embryonic tissue| e	NM_145375 // Tm6sf1 // transmembrane 6 superfamily member 1 // 7 D1|7 // 107769 /// ENS	NM_145375	Tm6sf1	416.798	98.6058	4.22692	2.46721e-20	-16.3876	3.14617e-12	-4.75141	0.000119538	-1.95624	0.0130126	1.50469	0.000170157	1.92088	0.0185303	1.47084	1.32458e-05	-2.18617	0.000658728	-1.7883	2.43109e-06	-2.37733	5.42405e-08	-2.86601	3.90591e-05	2.07091	0.16001	1.25215	0.583299	-1.09072	0.000921587	-1.75601	0.0023791	-1.66568	0.000108494	2.13736	0.39431	1.16409	0.619852	-1.08166	0.000150287	-1.93327	0.00439196	-1.70485
NM_013912 // Mm.29262 // bone| brain| dorsal root ganglion| embryonic tissue| eye| join	NM_013912 // Apln // apelin // X|X A3.2 // 30878 /// ENSMUST00000039026 // Apln // apel	NM_013912	Apln	312.84	39.4587	7.9283	8.05216e-21	-16.2496	1.93887e-16	-7.91864	2.39995e-08	-2.87375	0.0412565	1.37705	0.199323	1.21885	0.117273	1.27481	0.978432	-1.00413	0.935676	1.01239	0.00563198	1.55924	0.803023	-1.0388	5.31072e-07	2.48005	1.34788e-14	6.1081	0.000127083	1.90572	6.35017e-07	2.45913	0.00140832	-1.68388	0.669704	1.07595	1.72098e-06	2.60628	0.249975	-1.19365	0.688043	1.06323	0.00491436	-1.6618
NM_010483 // Mm.4833 // brain| adult /// ENSMUST00000055884 // Mm.4833 // brain| adult	NM_010483 // Htr5b // 5-hydroxytryptamine (serotonin) receptor 5B // 1 E4-G|1 63.0 cM /	NM_010483	Htr5b	330.217	32.7148	10.0938	7.88159e-21	-16.0868	1.8981e-14	-5.94192	4.50219e-06	-2.23316	1.24111e-08	-2.95266	0.0088682	-1.51569	0.433216	-1.12696	0.000722046	-1.74038	0.194902	-1.22027	0.44472	-1.1236	0.344686	-1.15532	0.683407	-1.06398	0.293266	-1.17445	0.359209	1.15032	0.890785	1.02108	0.000346213	-1.80738	0.187699	-1.25535	0.61707	1.08924	0.628011	-1.0765	0.155189	1.24457	0.000533065	-1.89694
NM_029525 // Mm.123247 // bone marrow| brain| embryonic tissue| eye| fertilized ovum| h	NM_029525 // Prex2 // phosphatidylinositol-3,4,5-trisphosphate-dependent Rac exchange f	NM_029525	Prex2	628.255	250.494	2.50807	8.72892e-28	-15.9336	1.05959e-21	-6.58801	3.62221e-05	-1.57	3.00761e-08	-1.94839	0.213598	-1.13015	0.983989	-1.00196	0.155439	-1.15048	0.0187153	1.26798	0.536912	1.06214	0.0311523	1.24155	0.130583	-1.16118	0.0127618	-1.28738	0.0982576	1.17811	0.300111	1.10696	0.263811	1.11596	8.23362e-09	-2.21249	0.00013388	-1.58519	0.026122	-1.25078	0.12788	1.16245	0.0016915	1.44298
NM_001003911 // Mm.102141 // brain| embryonic tissue| extraembryonic tissue| eye| heart	NM_001003911 // Adamts7 // a disintegrin-like and metallopeptidase (reprolysin type) wi	NM_001003911	Adamts7	920.082	59.9684	15.3428	3.51895e-23	-15.8167	2.8492e-17	-6.4561	2.17041e-05	-1.8621	0.0121123	-1.40362	0.929581	1.01153	0.464442	1.09987	0.000118716	-1.73503	0.00892301	-1.42573	0.00909999	-1.42431	0.000213243	-1.69236	1.09356e-08	-2.533	3.05695e-06	-2.01673	0.000225437	-1.68833	1.69347e-07	-2.26624	0.000195182	-1.69877	1.69971e-07	-2.50699	0.000669222	-1.70787	0.00260844	-1.51355	0.000113482	-1.73833	0.00498513	-1.53871
NM_011897 // Mm.89982 // brain| embryonic tissue| eye| intestine| lung| mammary gland|	NM_011897 // Spry2 // sprouty homolog 2 (Drosophila) // 14 E2.3|14 51.0 cM // 24064 ///	NM_011897	Spry2	994.201	1390.32	0.715089	1.87303e-29	-15.4781	4.1612e-27	-10.7034	1.859e-11	-2.23568	0.118875	-1.14774	0.806218	-1.02157	0.632535	1.04253	1.85229e-06	-1.6226	0.00027185	-1.41321	0.0137726	-1.24972	7.04265e-05	-1.46854	0.0211196	1.23077	6.3552e-05	1.47277	0.000671053	1.3763	0.000126994	1.44433	0.584547	-1.0488	0.423258	1.08175	0.457876	1.07552	0.188139	1.12272	0.806773	-1.02151	0.215584	-1.13001
NM_009574 // Mm.308936 // brain| embryonic tissue| eye| inner ear| organogenesis| fetus	NM_009574 // Zic2 // zinc finger protein of the cerebellum 2 // 14 E5|14 62.0 cM // 227	NM_009574	Zic2	424.598	283.232	1.49912	2.22993e-22	-15.0759	8.69782e-20	-9.87244	9.04239e-07	-2.17391	9.40748e-08	-2.38913	5.91463e-05	-1.82262	0.0245164	-1.36595	6.95094e-11	-3.2589	3.59502e-08	-2.48747	0.00151066	-1.57605	0.00719641	-1.45949	1.8858e-14	4.82604	3.91745e-17	6.75897	4.39194e-17	6.71433	5.25891e-16	5.83659	0.0374153	-1.33271	0.00467493	-1.56744	0.978286	-1.00411	0.387674	1.1235	0.528132	1.08855	0.732605	-1.05289
NM_198029 // Mm.209784 // embryonic tissue| intestine| kidney| lung| mammary gland| sto	NM_198029 // Fermt1 // fermitin family homolog 1 (Drosophila) // 2 F2|2 // 241639 /// E	NM_198029	Fermt1	122.55	147.175	0.832679	9.46458e-18	-14.3908	5.38332e-10	-4.29933	0.1136	-1.33434	8.50051e-06	-2.49145	0.0250771	-1.51468	0.00989569	-1.62141	1.48098e-05	-2.41463	0.0299025	-1.49427	0.0960672	-1.35515	0.758189	-1.0568	0.000306452	2.02608	0.000819227	1.90869	0.000277913	-2.03794	1.58672e-05	-2.40522	2.39238e-07	-3.04123	0.00106527	2.02998	0.138632	1.35354	0.113265	-1.33471	6.1764e-05	-2.22562	0.00135761	-1.99563
NM_013661 // Mm.42015 // adrenal gland| brain| embryonic tissue| eye| inner ear| ovary|	NM_013661 // Sema5b // sema domain, seven thrombospondin repeats (type 1 and type 1-lik	NM_013661	Sema5b	42.0513	63.5923	0.661264	6.61175e-22	-14.097	8.06787e-21	-11.7632	9.97165e-06	-1.97342	0.0320567	-1.34712	0.0174259	-1.39488	0.0937937	-1.25885	0.0433926	-1.32288	0.0325221	-1.34598	0.0464922	-1.3173	0.0253157	-1.36577	5.10776e-06	-2.03002	0.0256329	-1.36479	0.0004857	-1.6656	0.204485	-1.18881	0.178016	1.20181	0.00198193	-1.64765	0.414877	-1.13213	0.0086064	-1.44894	0.681656	-1.05695	0.451645	1.1213
NM_001145192 // Mm.400254 // brain| spinal cord| juvenile| adult /// ENSMUST00000169935	NM_001145192 // A330050F15Rik // RIKEN cDNA A330050F15 gene // 17 E1.3|17 // 320722 ///	NM_001145192	A330050F15Rik	223.312	24.258	9.20571	1.80331e-19	-14.067	1.46974e-13	-5.66542	0.000157882	-1.93002	0.00274974	-1.65306	0.127865	-1.27704	0.295383	1.18143	0.0421241	-1.39141	0.0289467	-1.42834	0.434812	-1.13207	0.0976268	-1.30577	0.185803	1.2358	0.120038	1.28383	0.934391	-1.01311	0.73779	1.05443	0.17461	-1.24279	0.747433	1.05895	0.747423	1.05896	0.712254	-1.06014	0.847135	-1.03098	0.543319	-1.11438
NR_028305 // Mm.472852 // blood| bone marrow| brain| embryonic tissue| extraembryonic t	NR_028305 // Tmem181c-ps // transmembrane protein 181C, pseudogene // 17 A1|17 // 10004	NR_028305	Tmem181c-ps	884.547	33.6331	26.2999	9.29563e-14	-13.9775	8.93452e-12	-9.49857	7.28473e-05	-2.84125	9.85183e-10	-6.55465	3.75822e-08	-4.9832	0.293311	-1.28501	8.73666e-06	-3.3329	3.3209e-05	-3.01586	0.20989	-1.35002	0.00844058	-1.92158	4.91199e-05	2.92783	0.00764443	1.93911	0.713381	1.09101	0.560193	1.14835	0.208651	-1.35114	0.739874	1.09248	0.598654	1.15069	0.00172604	-2.2084	0.246282	-1.3193	0.466517	-1.21471
NM_026993 // Mm.234247 // bone| brain| connective tissue| dorsal root ganglion| embryon	NM_026993 // Ddah1 // dimethylarginine dimethylaminohydrolase 1 // 3|3 H3 // 69219 ///	NM_026993	Ddah1	727.388	389.678	1.86664	1.09547e-14	-13.4059	3.98498e-05	-2.71854	0.236053	-1.29681	2.30836e-07	-3.85888	0.194365	-1.33001	0.878611	-1.03376	0.160714	-1.3618	0.0241994	1.65944	0.841893	1.04432	0.221663	1.30764	0.0926705	-1.45103	0.289902	-1.26076	0.615823	-1.11543	0.134296	-1.39131	0.203368	-1.32234	0.410848	-1.22352	0.710138	1.09511	0.32297	1.24134	0.499491	1.1586	0.61078	-1.13259
NM_018805 // Mm.274426 // bone| brain| embryonic tissue| epididymis| eye| inner ear| ki	NM_018805 // Hs3st3b1 // heparan sulfate (glucosamine) 3-O-sulfotransferase 3B1 // 11 B	NM_018805	Hs3st3b1	955.721	147.66	6.47242	3.9698e-25	-13.124	2.67224e-24	-11.5127	3.36827e-14	-3.4225	0.290722	1.12045	0.031116	1.26805	0.00758719	1.34855	0.000175351	-1.55347	0.0137717	-1.31513	0.414219	-1.09159	0.0065713	-1.35652	1.62035e-11	2.70111	0.000162166	1.55774	3.29794e-06	1.77819	0.776378	1.03084	0.408412	-1.0928	0.354405	1.11832	0.712098	1.04535	0.0119408	-1.32319	0.00255937	-1.40819	0.603119	-1.06454
NM_001033347 // Mm.358909 // brain| embryonic tissue| eye| lung| spinal cord| thymus| b	NM_001033347 // D430041D05Rik // RIKEN cDNA D430041D05 gene // 2 E2|2 57.9 cM // 241589	NM_001033347	D430041D05Rik	150.895	34.853	4.32948	1.27426e-27	-13.0208	9.42918e-26	-9.82459	2.96399e-10	-2.13716	1.082e-21	-5.83906	2.38109e-13	-2.67451	0.010606	-1.27544	2.01869e-15	-3.1576	5.04349e-08	-1.84026	0.0189198	-1.24851	0.768321	-1.02725	0.999838	-1.00002	0.501912	1.06335	0.939988	1.00689	4.70893e-05	1.51407	0.575796	1.05247	0.106941	-1.18298	0.113906	-1.17901	0.247248	-1.11233	0.0105754	1.27557	0.305064	1.11163
NM_010136 // Mm.200692 // brain| embryonic tissue| eye| heart| lung| spinal cord| splee	NM_010136 // Eomes // eomesodermin homolog (Xenopus laevis) // 9 F3|9 67.0 cM // 13813	NM_010136	Eomes	910.209	121.531	7.48953	3.255e-20	-12.65	8.59779e-12	-3.95539	0.2321	-1.19042	1.59398e-17	-8.29213	8.13779e-16	-6.5191	2.73312e-07	-2.43577	1.67782e-13	-4.8418	3.637e-13	-4.6482	3.69725e-05	-1.95113	0.66012	-1.0657	7.00493e-15	5.75995	4.40381e-05	1.93545	1.93764e-06	2.23067	0.310994	-1.15881	0.0737136	-1.302	8.50436e-14	6.12909	1.84036e-15	7.7916	0.000276452	1.77522	6.51493e-08	2.59819	0.00141512	-1.74089
ENSMUST00000027997 // Mm.20954 // bladder| brain| embryonic tissue| extraembryonic tiss	ENSMUST00000027997 // Rgs5 // regulator of G-protein signaling 5 // 1 H2|1 86.5 cM // 1	ENSMUST00000027997	Rgs5	497.385	31.1988	15.9424	5.77197e-25	-11.7817	4.01507e-16	-3.94253	0.0599729	1.22033	0.0243513	1.27223	0.030328	1.25988	0.615696	-1.05339	0.160069	1.15858	0.00208417	1.4035	1.6967e-05	1.65534	3.80669e-11	2.53924	0.599381	-1.05594	0.468262	-1.07819	0.0370442	1.24848	0.823121	1.0234	0.883736	-1.01524	0.14224	-1.18884	0.635548	-1.05672	0.135529	1.1696	0.35347	1.10133	0.742965	1.03888
NM_053167 // Mm.184012 // brain| dorsal root ganglion| embryonic tissue| eye| inner ear	NM_053167 // Trim9 // tripartite motif-containing 9 // 12 C3|12 // 94090 /// ENSMUST000	NM_053167	Trim9	194.983	30.2837	6.43855	5.82159e-26	-11.6346	2.67853e-24	-9.11951	2.5047e-12	-2.61533	2.02195e-09	-2.10623	0.00564473	-1.32504	0.880628	-1.01463	2.68848e-19	-4.93844	1.74228e-13	-2.86878	7.1185e-11	-2.34125	1.83744e-09	-2.11249	0.0592592	1.20521	0.0211405	1.25961	0.482822	-1.07044	0.0547351	1.20956	0.671952	1.04184	0.110418	-1.19282	0.905903	-1.01293	0.00767399	-1.3101	0.269754	1.11355	0.0689001	1.22376
ENSMUST00000025294 // Mm.52526 // blood| bone| bone marrow| brain| connective tissue| e	ENSMUST00000025294 // Ttc39c // tetratricopeptide repeat domain 39C // 18|18 A2 // 7274	ENSMUST00000025294	Ttc39c	205.476	38.6632	5.31452	4.14136e-24	-10.8342	1.76419e-18	-5.20002	2.26174e-07	-1.92701	3.41129e-05	-1.63321	0.0504995	-1.23553	0.542056	-1.06659	0.195177	-1.14813	0.35326	1.10347	0.603068	1.05648	0.407091	1.09181	0.179354	1.15407	0.34037	1.10645	0.0462438	-1.24081	0.655561	-1.04824	0.479785	1.07764	0.339761	1.12054	0.0303522	1.30296	0.0096744	-1.32999	0.47008	1.07945	0.768786	1.03547
NM_009575 // Mm.255890 // brain| embryonic tissue| eye| lung| ovary| spinal cord| testi	NM_009575 // Zic3 // zinc finger protein of the cerebellum 3 // X A6|X 16.5 cM // 22773	NM_009575	Zic3	157.151	730.323	0.21518	1.8538e-24	-10.761	5.87258e-24	-9.99181	3.33682e-18	-4.84505	1.45262e-06	-1.78668	0.155696	-1.1595	0.160348	1.15754	3.22449e-11	-2.54094	1.82159e-09	-2.21681	1.34674e-09	-2.23908	1.48908e-11	-2.61043	0.088327	-1.19565	0.231282	1.13236	0.513274	1.06977	0.41782	1.08731	0.217369	1.13674	0.0540786	1.25624	0.00512062	1.40598	0.0006568	1.46022	0.0524597	1.22688	0.77866	1.03304
ENSMUST00000031650 // Mm.20358 // embryonic tissue| extraembryonic tissue| intestine| m	ENSMUST00000031650 // Cdx2 // caudal type homeobox 2 // 5 G2-G3|5 82.0 cM // 12591 ///	ENSMUST00000031650	Cdx2	630.074	46.2173	13.6329	2.20825e-20	-10.6531	1.3649e-15	-5.4771	1.52265e-05	-1.92272	0.152454	-1.21314	0.747209	1.04391	0.0816696	-1.26695	0.209768	-1.18392	0.0890665	-1.25969	0.0436859	-1.31785	0.0117552	-1.41903	1.27926e-21	13.0082	1.05621e-22	15.6672	2.64071e-20	10.5248	3.5423e-21	12.0935	0.0670096	-1.28331	0.00124268	-1.6786	0.240359	-1.19405	0.000746044	-1.62338	0.157168	-1.21041	0.977882	-1.00416
NM_001163314 // Mm.103539 // bone marrow| brain| dorsal root ganglion| embryonic tissue	NM_001163314 // Pgap1 // post-GPI attachment to proteins 1 // 1 C1.1|1 // 241062 /// EN	NM_001163314	Pgap1	2494.88	983.561	2.53658	9.99308e-27	-10.6426	7.10479e-18	-3.78926	0.00247764	-1.33053	0.00296022	-1.32293	0.39767	-1.07841	0.361958	-1.08483	0.141418	-1.14166	0.805116	1.02217	0.883596	-1.01309	0.754117	1.02823	0.364322	1.08439	0.480573	-1.06488	0.485684	-1.0641	0.000761927	-1.38042	0.759767	1.02755	0.414622	1.08522	0.00865016	1.3155	0.161796	1.13414	0.0276523	1.22377	0.0368104	1.23915
ENSMUST00000049787 // Mm.386903 // embryonic tissue| extraembryonic tissue| pancreas| s	ENSMUST00000049787 // Lrrn4 // leucine rich repeat neuronal 4 // 2 F2|2 // 320974 /// N	ENSMUST00000049787	Lrrn4	419.85	102.338	4.10258	1.18018e-16	-10.6298	3.63307e-10	-4.12722	0.0134317	-1.55523	0.19289	1.2535	9.64617e-05	2.0977	0.584646	1.09855	3.36849e-05	-2.22299	0.137369	-1.29519	5.17853e-06	-2.45998	8.04961e-07	-2.71725	0.156267	-1.27956	0.0893778	-1.3459	0.694562	1.06978	0.0145311	-1.54678	0.0527998	-1.40578	0.0178103	-1.6065	0.45706	-1.1548	0.310655	-1.19144	0.0882965	-1.34731	0.070982	-1.42712
ENSMUST00000028829 // Mm.245890 // bladder| blood| bone marrow| brain| dorsal root gang	ENSMUST00000028829 // Spred1 // sprouty protein with EVH-1 domain 1, related sequence /	ENSMUST00000028829	Spred1	504.362	717.751	0.702698	2.52886e-25	-10.4104	8.33484e-23	-7.36701	2.22649e-13	-2.82501	0.00473142	-1.33111	0.788812	1.02608	0.66425	-1.04263	5.7983e-11	-2.34393	1.78032e-05	-1.59457	9.88041e-05	-1.51278	0.000169963	-1.48727	0.000770203	-1.41663	0.0015411	-1.38417	0.0010916	-1.40033	0.000821028	-1.41364	0.956844	-1.00521	0.0772175	-1.2149	0.422906	-1.09075	0.00527062	-1.32594	0.0362937	-1.22995	0.337088	-1.10986
ENSMUST00000039118 // Mm.390761 // brain| embryonic tissue| eye| testis| organogenesis|	ENSMUST00000039118 // Zic5 // zinc finger protein of the cerebellum 5 // 14 E5|14 // 65	ENSMUST00000039118	Zic5	276.566	276.466	1.00036	8.49989e-24	-9.71937	1.4108e-18	-5.0312	7.03147e-05	-1.57423	9.08222e-08	-1.94991	4.98831e-06	-1.71565	0.00550206	-1.34973	5.37604e-05	-1.58825	9.06374e-05	-1.56102	0.0183326	-1.28559	0.294867	-1.11442	2.42682e-06	1.7557	9.67358e-10	2.26032	1.17336e-08	2.08275	5.419e-09	2.13575	0.650976	1.04762	0.706606	-1.04443	0.839958	-1.02358	0.0931456	1.19197	0.757396	-1.03225	0.41342	1.09941
DQ975303 // Mm.381907 // brain| embryonic tissue| eye| lung| mammary gland| ovary| thym	DQ975303 // C77370 // expressed sequence C77370 // X D|X // 245555 /// ENSMUST000000878	DQ975303	C77370	549.715	559.595	0.982344	7.81317e-25	-9.71693	1.14551e-14	-3.14763	0.185747	-1.13735	1.95519e-07	-1.82642	0.0214102	-1.25738	0.0285015	-1.24275	2.16092e-09	-2.09338	0.00221239	-1.36757	0.000313665	-1.4591	0.0576425	-1.20549	0.0308313	-1.23869	1.35238e-05	-1.60863	0.515281	1.06474	1.35352e-05	-1.60859	0.120683	-1.16368	0.419919	1.09145	0.695664	1.04321	0.000134184	1.49894	0.391513	1.08631	0.306959	-1.11754
NM_030689 // Mm.38438 // bladder| blood| bone| bone marrow| brain| connective tissue| d	NM_001013362 // Npcd // neuronal pentraxin chromo domain // 15E2|15 // 504193 /// ENSMU	NM_001013362	Npcd	597.163	143.524	4.16071	1.51785e-28	-9.56282	2.86128e-23	-5.06896	5.08691e-07	-1.57189	0.0906583	-1.13957	0.681547	1.03163	0.0320248	1.18231	9.34521e-05	-1.38814	0.00100277	-1.3072	0.80281	-1.01911	0.000360968	-1.34213	0.000375466	1.34078	0.18009	1.10826	5.2548e-08	1.6584	0.0649385	1.15377	0.521829	1.04988	0.105674	1.15046	0.751287	1.02738	0.00345745	1.26423	0.501933	-1.05237	0.415687	-1.07209
NM_024286 // Mm.24748 // embryonic tissue| extraembryonic tissue| heart| lung| lymph no	NM_024286 // Popdc3 // popeye domain containing 3 // 10 B2|10 29.0 cM // 78977 /// ENSM	NM_024286	Popdc3	190.498	28.3742	6.71377	2.51336e-19	-9.36328	5.11672e-14	-4.63963	4.71663e-06	-2.03971	0.205947	-1.18853	0.57506	1.07888	0.0113532	1.42883	1.17319e-06	-2.16274	2.57992e-06	-2.09226	1.06592e-05	-1.97048	3.02153e-05	-1.88469	7.73206e-20	10.1215	1.83129e-21	13.1454	6.23491e-20	10.2687	5.26967e-20	10.3857	0.784241	1.03771	0.201134	1.21676	0.231171	1.20144	0.404348	1.11986	0.272267	-1.1613	0.691103	-1.06226
ENSMUST00000029451 // Mm.485457 // bladder| bone| bone marrow| brain| connective tissue	ENSMUST00000029451 // Tspan2 // tetraspanin 2 // 3|3 F3 // 70747 /// NM_027533 // Tspan	ENSMUST00000029451	Tspan2	135.599	106.361	1.2749	6.79694e-15	-9.35724	2.56366e-10	-4.68394	0.000105768	-2.20439	0.00161121	-1.86097	0.368125	-1.18154	0.375186	-1.17863	0.286273	1.21906	0.0250323	1.53267	0.192689	1.27489	0.00807679	1.66775	2.83697e-05	2.38301	0.00108929	1.90867	0.49863	-1.1333	0.0821367	-1.38669	0.00372098	-1.76018	0.0203606	1.64515	0.0453593	1.53055	0.163372	-1.29728	0.096219	-1.36657	0.116972	-1.39099
NM_144867 // Mm.221420 // brain| embryonic tissue| eye| inner ear| mammary gland| skin|	NM_144867 // Slmo1 // slowmo homolog 1 (Drosophila) // 18 E1|18 // 225655 /// ENSMUST00	NM_144867	Slmo1	183.472	227.64	0.805975	1.05297e-10	-9.27676	1.22144e-07	-5.1936	0.010904	-1.97911	0.00604826	-2.09869	0.0311172	-1.77008	0.434989	1.22313	0.0615708	-1.63471	0.464217	-1.20773	0.671347	-1.11534	0.104916	-1.52787	0.23692	1.35894	0.478711	1.20037	0.590985	1.14839	0.179176	-1.41803	0.0645453	-1.62531	0.137534	1.54494	0.0734855	1.69503	0.548449	1.16715	0.651362	-1.1233	0.0437966	-1.81807
NM_145933 // Mm.149029 // bone| bone marrow| brain| dorsal root ganglion| embryonic tis	NM_145933 // St6gal1 // beta galactoside alpha 2,6 sialyltransferase 1 // 16 B1|16 15.5	NM_145933	St6gal1	212.901	142.938	1.48946	4.11474e-16	-9.05066	7.76988e-14	-6.4343	9.39416e-06	-2.31842	1.39638e-06	2.55947	3.85941e-06	2.42825	0.15115	1.2736	0.31344	-1.18374	0.780046	-1.04754	0.0584576	-1.37988	0.151527	-1.27331	3.4871e-05	2.16398	8.33385e-10	3.77431	0.0322325	1.44316	0.000871861	1.81408	0.0257847	-1.46648	0.0212103	-1.56146	0.210609	1.26646	0.00343698	-1.67297	0.337844	-1.17384	0.802523	-1.04784
NM_025508 // Mm.290802 // bone| bone marrow| brain| embryonic tissue| epididymis| extra	NM_025508 // Gmpr // guanosine monophosphate reductase // 13 A5|13 // 66355 /// ENSMUST	NM_025508	Gmpr	338.415	135.134	2.50429	5.79259e-21	-9.012	4.5974e-18	-6.11373	6.67503e-12	-3.14035	0.00182245	1.4862	7.77174e-06	1.84029	0.000583613	1.55792	0.00013158	-1.6527	0.085416	-1.23242	0.0130016	-1.36101	3.9034e-06	-1.88815	6.41769e-08	-2.19884	0.036081	-1.29314	0.0201912	-1.33213	0.0904434	-1.22823	0.649625	-1.05571	0.000200008	-1.72654	0.423868	-1.11353	0.588552	-1.06672	0.526616	-1.07859	0.582129	-1.07662
NM_146227 // Mm.102265 // brain| embryonic tissue| liver| testis| fetus| juvenile /// E	NM_146227 // Prss50 // protease, serine, 50 // 9 F3|9 63.99 cM // 235631 /// ENSMUST000	NM_146227	Prss50	142.518	149.229	0.955029	1.41474e-26	-8.9736	2.58138e-22	-5.3434	8.22342e-07	-1.62268	0.713116	-1.03109	0.389361	1.07462	0.0746042	1.16352	0.0417822	1.19009	0.00261377	1.30457	4.05717e-05	1.46574	2.09939e-06	1.58381	9.35162e-13	2.35454	4.79976e-15	2.77422	1.47458e-07	1.69643	2.05349e-15	2.85288	0.763556	1.02536	2.5097e-09	2.04174	4.34218e-08	1.87673	0.00828086	1.25859	4.19093e-07	1.6512	0.16657	-1.1399
NM_007994 // Mm.391871 // brain| embryonic tissue| extraembryonic tissue| intestine| ki	NM_007994 // Fbp2 // fructose bisphosphatase 2 // 13 B3|13 // 14120 /// ENSMUST00000021	NM_007994	Fbp2	190.393	54.4466	3.49688	1.82805e-13	-8.89425	1.20777e-09	-4.85716	0.00350251	-1.85942	0.0814098	1.42894	0.00965449	1.72131	0.467351	1.15772	0.00628384	1.7796	0.00524504	1.80421	0.210845	1.28897	0.0252212	1.59107	4.35578e-08	3.86533	0.122859	1.36981	1.10682e-11	6.64141	1.66939e-05	2.66303	0.125142	1.36713	0.0808629	-1.49452	0.452971	-1.18525	0.22217	-1.28087	0.592007	1.11385	0.742115	-1.07713
NM_023814 // Mm.158789 // brain| connective tissue| embryonic tissue| inner ear| mammar	NM_023814 // Tbx18 // T-box18 // 9 E3.2|9 48.5 cM // 76365 /// ENSMUST00000034991 // Tb	NM_023814	Tbx18	111.995	27.3768	4.09087	3.15213e-18	-8.85087	1.25344e-17	-8.10446	3.79959e-09	-2.90031	1.0991e-12	-4.27396	2.86599e-06	-2.16107	0.232844	-1.18637	0.659552	1.0646	0.0350956	1.36054	0.0286495	1.37776	0.403791	1.1264	2.52012e-05	1.96152	0.976363	1.00421	1.49646e-06	2.22401	0.176008	1.21451	0.349672	1.14281	0.993069	1.00139	0.443286	1.13057	0.844986	1.02814	0.137829	1.23818	0.829903	1.03486
NM_011934 // Mm.235550 // brain| embryonic tissue| extraembryonic tissue| eye| heart| k	NM_011934 // Esrrb // estrogen related receptor, beta // 12 D2|12 41.0 cM // 26380 ///	NM_011934	Esrrb	300.092	293.951	1.02089	1.26673e-23	-8.80295	5.38013e-18	-4.48877	1.19666e-06	-1.7615	1.34045e-05	-1.63429	0.647768	1.04648	0.808144	-1.02441	0.00326802	-1.36239	0.147486	-1.15698	0.00761528	-1.32011	0.0486968	-1.22235	0.900318	-1.01252	0.961401	-1.00482	0.149797	1.156	0.512681	1.06736	0.285627	1.11273	0.986861	-1.00184	0.964526	1.00497	0.312908	1.10614	0.838317	1.02047	0.640834	1.05351
---	NR_030559 // Mir453 // microRNA 453 // 12|12 // 100124484	NR_030559	Mir453	344.802	507.858	0.678935	2.49696e-12	-8.6039	1.78131e-08	-4.56234	0.138703	-1.38409	0.0627929	-1.50966	0.000916653	-2.16331	0.0916402	1.45047	0.189058	1.33302	0.56988	-1.13115	0.00289874	1.98065	0.295391	-1.25617	1.48941e-06	-3.38441	2.01839e-09	-5.29895	0.804628	1.05501	3.56874e-05	-2.72755	0.819343	1.05069	0.243789	-1.33102	0.812895	-1.05927	0.00337052	1.95718	0.1834	1.33809	0.277968	-1.30452
NM_013599 // Mm.4406 // bladder| blood| bone| bone marrow| brain| embryonic tissue| ext	NM_013599 // Mmp9 // matrix metallopeptidase 9 // 2 H1-H2|2 96.0 cM // 17395 /// ENSMUS	NM_013599	Mmp9	809.751	65.6858	12.3276	8.1462e-15	-8.47069	2.23056e-11	-5.09576	0.00356516	-1.72668	0.452508	-1.14295	0.561233	1.1087	0.35191	1.18045	0.409779	1.15803	0.136137	1.30728	0.0114931	1.59529	0.0446591	1.44096	9.2658e-08	3.16239	6.50429e-06	2.50137	0.545588	1.11333	0.0679864	-1.39171	0.0512267	-1.42499	0.487436	1.14878	0.0430677	1.51246	7.37168e-05	-2.18233	0.000253952	-2.03145	0.25353	-1.2577
NM_146028 // Mm.181008 // blood| brain| connective tissue| dorsal root ganglion| embryo	NM_146028 // Stac2 // SH3 and cysteine rich domain 2 // 11 D|11 // 217154 /// ENSMUST00	NM_146028	Stac2	176.162	98.4869	1.78868	8.11269e-17	-8.43431	2.95906e-13	-5.14843	0.00135135	-1.69051	0.395812	-1.13948	0.765009	1.04684	0.547742	1.09661	0.102569	-1.28948	0.277254	1.18243	0.725166	-1.05533	0.937038	1.01216	0.000954931	1.7221	0.0176004	1.45792	0.00614227	1.55368	0.076959	1.3182	0.0496768	-1.36078	0.044416	-1.42609	0.0614161	-1.38972	0.000241771	-1.84897	0.000418389	-1.79789	0.00969091	-1.59174
NM_011199 // Mm.3542 // brain| embryonic tissue| extraembryonic tissue| kidney| liver|	NM_011199 // Pth1r // parathyroid hormone 1 receptor // 9 F|9 58.0 cM // 19228 /// NM_0	NM_011199	Pth1r	552.62	49.0003	11.2779	5.63414e-21	-8.36439	4.89288e-17	-5.09183	0.0133756	-1.34477	0.019829	1.32009	0.131839	1.19236	0.602806	1.0618	4.46374e-05	-1.69072	5.41669e-06	-1.82536	0.00125257	-1.48838	1.3977e-05	-1.76394	3.33176e-09	2.382	0.0015528	1.47551	1.63237e-10	2.66577	1.23964e-07	2.08961	0.31369	-1.12375	0.608372	-1.0686	0.0702312	-1.27007	0.464004	-1.08821	0.849441	-1.02208	0.061369	-1.28071
NM_011299 // Mm.268383 // brain| dorsal root ganglion| embryonic tissue| extraembryonic	NM_011299 // Rps6ka2 // ribosomal protein S6 kinase, polypeptide 2 // 17 F4|17 3.65 cM	NM_011299	Rps6ka2	226.856	816.455	0.277854	8.23232e-21	-8.3016	1.92773e-19	-6.9083	1.45324e-11	-2.94974	0.657607	1.05277	2.38292e-05	1.73696	0.000521661	1.54574	1.06148e-12	-3.27855	1.26832e-08	-2.28212	2.07726e-09	-2.43945	3.06764e-10	-2.62108	1.51851e-09	2.46806	3.59523e-10	2.60535	0.79956	-1.02987	0.587883	-1.06494	0.24294	-1.14627	1.81171e-11	3.3389	9.36997e-10	2.81618	0.0146422	1.34198	0.754397	1.03694	0.378938	-1.12202
NM_011198 // Mm.292547 // bladder| bone marrow| brain| connective tissue| embryonic tis	NM_011198 // Ptgs2 // prostaglandin-endoperoxide synthase 2 // 1 H1|1 76.2 cM // 19225	NM_011198	Ptgs2	63.6408	105.448	0.603527	1.86749e-05	-7.74889	0.000398121	-5.0928	0.00617496	-3.37557	0.145377	-1.8669	0.0728455	-2.16981	0.198428	-1.73275	0.0213969	2.73829	0.00759312	3.26449	0.000610049	4.79131	0.000876298	4.54635	0.448772	-1.3792	0.175057	-1.7867	0.581936	1.26273	0.354776	-1.48215	0.274226	-1.59355	0.527632	1.35106	0.0789217	2.34385	0.000676884	4.72	0.000185946	5.66787	0.628601	1.25882
NM_199018 // Mm.236928 // adipose tissue| bone| bone marrow| brain| embryonic tissue| e	NM_199018 // Stard8 // START domain containing 8 // X C3|X // 236920 /// ENSMUST0000003	NM_199018	Stard8	846.721	282.724	2.99487	1.57884e-19	-7.69144	2.58414e-14	-4.10524	1.58046e-05	-1.81346	0.00731897	-1.40769	0.737839	1.04157	0.0454877	1.2836	6.92335e-06	-1.87159	0.00225089	-1.48459	0.017398	-1.35004	0.000222357	-1.63512	1.72245e-09	2.56814	0.0192261	1.34328	0.441338	-1.09855	5.93547e-06	-1.8826	4.91817e-05	-1.73561	4.92019e-12	3.76779	3.87731e-06	2.07308	0.335609	1.12502	0.00394804	-1.44809	4.47981e-06	-2.06034
NM_207680 // Mm.141083 // bladder| bone| bone marrow| brain| dorsal root ganglion| embr	NM_207680 // Bcl2l11 // BCL2-like 11 (apoptosis facilitator) // 2|2 F3-G1 // 12125 ///	NM_207680	Bcl2l11	634.859	341.587	1.85856	7.93902e-22	-7.64588	1.31441e-15	-3.78822	0.00150268	-1.42427	0.0356849	1.25275	0.0206395	1.28385	0.00964016	1.3257	0.0139678	-1.30548	0.215592	-1.13924	0.237757	1.13221	0.426079	-1.08687	0.257137	-1.12648	0.0664042	-1.21603	0.620395	1.05307	0.367952	-1.09893	0.622216	-1.05278	0.000299434	-1.58722	0.0132649	-1.3525	0.00756888	-1.33876	0.0592068	-1.22295	0.657436	-1.05338
NM_007989 // Mm.42011 // embryonic tissue| extraembryonic tissue| inner ear| testis| bl	NM_007989 // Foxh1 // forkhead box H1 // 15 D3|15 // 14106 /// ENSMUST00000037824 // Fo	NM_007989	Foxh1	901.254	1373.84	0.65601	2.82291e-27	-7.57754	4.72064e-17	-2.83319	0.996239	-1.00035	2.31409e-05	-1.42051	0.257287	-1.08762	0.204231	1.09892	0.0071994	-1.23025	0.000459116	-1.32247	0.0500673	-1.15919	0.00213614	-1.27161	4.70807e-09	1.72741	0.00102176	1.29614	4.3458e-05	1.39972	0.694682	-1.02931	0.0183527	-1.19703	5.47408e-09	1.84086	0.000134066	1.41592	0.000262352	1.34081	0.52281	-1.04824	0.00121597	-1.33169
NM_001135093 // Mm.204671 // embryonic tissue| pituitary gland| gastrula| fetus| adult	NM_001135093 // Klf14 // Kruppel-like factor 14 // 6 A3.3|6 // 619665 /// ENSMUST000001	NM_001135093	Klf14	75.9653	38.5466	1.97074	4.13744e-18	-7.38649	4.80619e-13	-3.9819	0.628701	-1.06561	4.66376e-11	-3.23177	1.4154e-07	-2.30513	0.106731	-1.24019	0.00540724	1.46825	0.000369156	1.66264	1.08031e-06	2.12178	1.55406e-06	2.09054	0.257438	1.16164	0.00901799	1.43096	0.030854	1.33916	8.15569e-07	2.14623	0.115157	1.23378	0.637698	-1.072	0.463216	-1.11463	0.80098	-1.03364	0.150774	1.21054	0.480677	1.10994
NM_007542 // Mm.2608 // adipose tissue| bone| bone marrow| brain| connective tissue| em	NM_007542 // Bgn // biglycan // X B|X 29.3 cM // 12111 /// ENSMUST00000033741 // Bgn //	NM_007542	Bgn	47.945	105.838	0.453001	2.251e-07	-7.35372	0.000163784	-3.77803	0.0165715	-2.22112	0.875739	1.05144	0.339632	1.36083	0.799429	1.08495	0.0986817	1.71451	0.0153153	2.24417	0.309413	1.38849	0.0996451	1.71179	0.391571	1.318	0.927929	1.02944	5.22206e-07	-6.76208	1.01416e-07	-7.96314	0.000873093	-3.15503	0.094943	-1.84567	0.294252	-1.46331	1.8596e-07	-7.4952	4.40589e-06	-5.46579	0.317002	-1.43759
ENSMUST00000093106 // Mm.267478 // brain| embryonic tissue| eye| liver| mammary gland|	ENSMUST00000093106 // Acsl6 // acyl-CoA synthetase long-chain family member 6 // 11 B1.	ENSMUST00000093106	Acsl6	174.985	74.5864	2.34607	5.1542e-23	-7.33349	1.55796e-19	-4.88991	1.75913e-10	-2.23382	2.23405e-14	-3.01481	5.70874e-08	-1.87524	0.107877	-1.16723	0.68383	-1.03931	0.00631116	1.31166	0.0429166	1.21733	0.769609	1.0281	0.000271629	1.45664	7.17528e-05	1.51786	9.27472e-05	1.50599	0.00048901	1.42975	0.84042	1.01923	0.467831	1.08049	0.0743108	1.21364	0.379295	1.08716	0.26329	1.11255	0.93907	-1.00816
NM_172784 // Mm.206759 // bladder| bone| brain| connective tissue| dorsal root ganglion	NM_172784 // Lrp11 // low density lipoprotein receptor-related protein 11 // 10 A1|10 /	NM_172784	Lrp11	280.624	717.164	0.391296	1.12042e-19	-7.27646	2.069e-15	-4.37295	1.35376e-09	-2.5031	0.0171173	1.33625	2.17338e-05	1.75334	7.32952e-05	1.67537	0.0780772	-1.23442	0.382959	1.10816	0.350623	1.11622	0.00756979	-1.38797	0.0124077	1.35681	0.0151499	1.34408	0.841336	1.02373	0.761134	-1.03627	0.372976	-1.11059	0.00459441	1.48183	0.00778574	1.44331	0.285205	1.13441	0.669126	1.05139	0.493563	-1.09459
NM_008815 // Mm.5025 // brain| embryonic tissue| eye| intestine| joint| kidney| lung| m	NM_008815 // Etv4 // ets variant gene 4 (E1A enhancer binding protein, E1AF) // 11 D|11	NM_008815	Etv4	297.366	313.669	0.948023	1.45906e-20	-7.21585	1.64956e-19	-6.31421	7.89152e-09	-2.22478	2.17941e-06	-1.83414	0.0684526	-1.22726	0.80508	1.02752	3.18708e-05	-1.67181	0.00168324	-1.44597	0.164267	-1.16756	0.00187058	-1.44002	0.613858	-1.05716	0.0125828	1.33097	0.00551581	1.37868	0.000886608	1.48205	0.57926	1.06301	8.12773e-06	-1.87903	0.00634209	-1.42515	0.000605571	-1.5035	0.000735034	-1.49259	0.455092	-1.09707
NM_009344 // Mm.3117 // adrenal gland| bone marrow| brain| connective tissue| dorsal ro	NM_009344 // Phlda1 // pleckstrin homology-like domain, family A, member 1 // 10 D1|10	NM_009344	Phlda1	424.068	93.466	4.53713	2.64389e-12	-7.17278	1.48687e-07	-3.5274	0.0530269	-1.4823	0.000968832	-2.02191	0.00612381	-1.77139	0.895281	1.02648	0.500144	1.14368	0.13889	-1.34719	0.454337	-1.16076	0.167833	-1.31945	0.510454	1.13999	0.0434224	-1.5095	0.137169	-1.349	1.5075e-06	-3.05761	0.00780388	-1.73904	0.116334	-1.42755	0.214246	-1.32291	0.00349494	-1.8466	0.000191	-2.25396	0.0941002	-1.46277
NM_029281 // Mm.271252 // brain| embryonic tissue| eye| heart| lung| skin| testis| thym	NM_029281 // Zfp820 // zinc finger protein 820 // 17 A3.3|17 // 75424 /// ENSMUST000000	NM_029281	Zfp820	106.693	111.546	0.956497	2.89388e-05	-7.16849	4.84858e-05	-6.69076	0.0223934	-2.69024	0.499686	-1.3278	0.627096	-1.22602	0.903262	1.05222	0.315856	-1.52626	0.704583	1.17226	0.0406696	-2.41342	0.224467	-1.67136	0.103086	2.00291	0.0653144	2.20164	0.0234949	2.6675	0.519938	1.31023	0.868421	1.07186	0.0510074	2.56359	0.00657921	3.82832	0.076993	2.12948	0.403632	1.42099	0.394378	-1.49583
ENSMUST00000033930 // Mm.170276 // brain| embryonic tissue| eye| inner ear| kidney| liv	ENSMUST00000033930 // Dusp4 // dual specificity phosphatase 4 // 8 A4|8 // 319520 /// N	ENSMUST00000033930	Dusp4	800.358	544.067	1.47107	5.97735e-25	-7.15871	6.39978e-23	-5.64264	1.18826e-11	-2.17498	0.804275	-1.0207	0.690795	1.03345	0.662158	-1.03681	5.58835e-07	-1.63337	0.000336755	-1.38086	0.0158418	-1.23011	0.225308	-1.10644	1.47422e-20	4.41164	1.09051e-19	4.05982	8.22849e-10	1.93584	2.24069e-08	1.77454	3.85777e-07	-1.64898	3.93979e-11	2.30547	2.65779e-06	1.65911	0.541944	1.05181	0.00140191	-1.32628	1.25313e-05	-1.58602
NM_020578 // Mm.18526 // adipose tissue| bone| bone marrow| brain| connective tissue| d	NM_020578 // Ehd3 // EH-domain containing 3 // 17 E2|17 43.25 cM // 57440 /// ENSMUST00	NM_020578	Ehd3	229.703	177.231	1.29606	7.65168e-18	-7.15539	4.21381e-13	-4.01978	1.18475e-05	-1.92643	4.75531e-09	-2.65734	0.000866411	-1.60235	0.00357745	-1.49959	1.35924e-07	-2.31346	0.000132091	-1.74067	2.02137e-05	-1.88419	3.63084e-05	-1.83865	0.390661	-1.12012	0.0016799	-1.55434	0.716157	1.04902	0.00222911	-1.53386	0.00462131	-1.48099	0.447083	-1.11937	0.00968505	-1.49101	0.0293837	1.34382	0.293323	-1.14935	0.327083	-1.15688
NM_027834 // Mm.158733 // bone marrow| connective tissue| intestine| prostate| skin| ad	NM_027834 // 9130008F23Rik // RIKEN cDNA 9130008F23 gene // 17|17 C // 71583 /// ENSMUS	NM_027834	9130008F23Rik	85.5968	27.7445	3.08518	1.11212e-16	-7.10408	1.71833e-14	-5.32474	2.35664e-05	-1.9691	0.000338387	-1.7415	0.00359696	-1.54885	0.838654	-1.02936	0.98298	1.00304	0.521866	-1.09555	0.945038	1.00984	0.274742	-1.1693	0.471985	1.10799	0.727517	1.0508	0.192018	-1.20617	0.0988741	-1.26961	0.00848441	-1.47914	0.308912	-1.17769	0.788994	1.04368	0.0186853	-1.41414	0.33274	-1.14853	0.0807543	-1.329
NM_001080934 // Mm.25773 // bone marrow| brain| intestine| kidney| liver| mammary gland	NM_001080934 // Slc16a5 // solute carrier family 16 (monocarboxylic acid transporters),	NM_001080934	Slc16a5	196.083	34.0542	5.75798	1.0002e-20	-7.01254	3.03239e-16	-4.19763	0.000150438	-1.5642	0.441569	1.08637	0.14379	1.17228	0.648329	1.05019	0.0105906	1.33122	0.0113732	1.3272	1.62048e-06	1.82444	1.60079e-05	1.68951	0.318339	-1.11371	0.0869892	-1.20571	0.880691	-1.01623	0.618725	1.05491	0.254472	1.13115	0.11607	1.21217	0.101002	-1.22274	0.302861	1.11767	0.218202	-1.14264	0.681308	-1.05078
NR_040328 // Mm.482777 // mammary gland| thymus| adult	NR_040328 // 4833419F23Rik // RIKEN cDNA 4833419F23 gene // 18|18 // 73915	NR_040328	4833419F23Rik	205.996	24.493	8.41039	3.01025e-22	-6.92568	3.82425e-17	-3.95714	0.0749635	-1.19175	0.744847	1.03192	0.307361	1.10425	0.501156	1.06727	0.180548	1.13966	0.142008	1.15453	0.456622	1.07475	0.364892	1.09188	0.933292	-1.00811	0.552745	-1.0591	0.556124	-1.05858	0.143166	-1.15403	0.877414	1.015	0.00800812	1.35137	0.109704	1.19284	0.755469	1.03053	0.177393	-1.14077	0.0616303	-1.23036
NM_010680 // Mm.42012 // embryonic tissue| epididymis| eye| lung| mammary gland| prosta	NM_010680 // Lama3 // laminin, alpha 3 // 18 A|18 3.0 cM // 16774 /// ENSMUST0000009207	NM_010680	Lama3	33.4519	41.7803	0.800662	2.69497e-25	-6.88707	9.6586e-22	-4.65691	0.0685727	-1.15895	0.00029574	-1.36751	0.00137868	-1.31172	0.0554448	-1.16824	0.688819	-1.03228	0.294519	-1.08728	0.221361	-1.10283	0.0666362	1.16021	1.15042e-08	-1.76265	0.000913455	-1.32671	4.2212e-05	-1.43798	0.469409	1.05922	0.000809056	1.33112	0.313953	1.09447	0.00522674	1.2993	0.0823083	1.15079	1.36506e-06	1.56622	0.142018	1.14181
NM_177364 // Mm.227616 // bladder| blood| bone| bone marrow| brain| connective tissue|	NM_177364 // Sh3pxd2b // SH3 and PX domains 2B // 11 A4|11 // 268396 /// ENSMUST0000003	NM_177364	Sh3pxd2b	614.66	76.4074	8.04452	7.40289e-20	-6.82706	2.81861e-17	-5.01082	1.20605e-09	-2.41485	0.783409	1.03129	0.00454145	1.39824	0.123082	1.19175	0.00691703	-1.37356	0.228258	-1.14596	0.00872455	-1.35984	0.000362968	-1.54446	6.55336e-05	1.64467	0.173225	1.16697	0.0985359	1.20728	0.259251	-1.1359	0.00153651	-1.46111	0.974692	1.004	0.171291	1.19041	0.00139298	-1.46677	0.103743	-1.20372	0.000756537	-1.57946
---	NM_172491 // D130040H23Rik // RIKEN cDNA D130040H23 gene // 8 B3.3|8 // 211135	NM_172491	D130040H23Rik	133.931	87.755	1.5262	4.76008e-12	-6.82467	3.39221e-09	-4.43568	7.14123e-05	-2.39218	0.177375	-1.30959	0.0475241	-1.49442	0.353465	-1.20247	0.436229	1.16702	0.603644	1.10823	0.185525	1.30292	0.759851	1.0623	0.0218796	1.59816	0.0834419	1.41737	0.00826612	1.72694	0.0394338	1.51957	0.12379	-1.36185	0.014745	-1.75587	0.451684	-1.1826	0.498626	-1.14351	0.204643	1.28824	0.848149	1.04344
NM_001045530 // Mm.247595 // bone marrow| brain| dorsal root ganglion| embryonic tissue	NM_001045530 // Ccnjl // cyclin J-like // 11 B1.1|11 // 380694 /// ENSMUST00000050574 /	NM_001045530	Ccnjl	371.218	131.176	2.82992	7.89692e-16	-6.75132	1.75394e-09	-3.12635	0.0127636	-1.46446	0.704818	1.05735	0.221832	1.19893	0.518515	1.0999	0.114562	-1.26603	0.720893	-1.054	0.166896	1.22856	0.692042	1.06005	2.88311e-06	-2.22179	0.435594	1.12201	1.19633e-06	-2.31306	0.570029	-1.08732	0.71829	1.05454	0.590817	1.0931	0.00864879	1.57464	0.218509	-1.20054	0.872247	1.02394	0.283864	-1.19534
NM_001033228 // Mm.317280 // bladder| bone| brain| embryonic tissue| extraembryonic tis	NM_001033228 // Itga1 // integrin alpha 1 // 13 D2.2|13 65.0 cM // 109700 /// ENSMUST00	NM_001033228	Itga1	171.687	136.692	1.25601	7.33897e-17	-6.69022	5.04127e-14	-4.68867	9.22584e-06	-1.99125	0.000164886	1.75652	5.66459e-06	2.03308	0.146479	1.22167	0.000102643	-1.79387	0.00750009	-1.46399	0.00303258	-1.53305	0.00163192	-1.58014	0.386415	-1.12567	0.528966	-1.08964	0.850839	1.02591	0.00159763	-1.58176	0.159059	-1.21412	0.0749438	-1.32026	0.419727	-1.13182	0.113931	-1.24424	0.000110357	-1.78813	0.0741026	-1.32137
ENSMUST00000005452 // Mm.276715 // adrenal gland| brain| embryonic tissue| eye| fertili	ENSMUST00000005452 // Fgfr4 // fibroblast growth factor receptor 4 // 13 B1|13 33.0 cM	ENSMUST00000005452	Fgfr4	333.988	56.4832	5.91305	4.64529e-17	-6.64051	2.1314e-11	-3.42025	1.55739e-07	-2.33117	0.000432966	-1.66614	0.304889	-1.14799	0.768141	1.04019	5.7089e-06	-2.00703	6.38578e-05	-1.81216	2.47926e-06	-2.07805	7.74418e-07	-2.18097	0.0103548	1.42993	0.198013	1.18986	0.872515	1.02167	0.707753	-1.05141	0.35575	1.13209	1.28719e-06	2.3454	0.000910919	1.70839	0.128594	1.22888	0.991541	1.00142	0.219553	-1.20455
NM_001081007 // Mm.443484 // brain| connective tissue| embryonic tissue| pancreas| thym	NM_001081007 // Zfp382 // zinc finger protein 382 // 7 B1|7 // 233060 /// ENSMUST000000	NM_001081007	Zfp382	770.572	138.034	5.58248	1.1043e-19	-6.55963	8.75558e-18	-5.22606	1.61749e-06	-1.86312	1.04076e-09	-2.40759	5.18067e-06	-1.7896	0.0904431	-1.21096	1.66219e-08	-2.18289	1.55818e-06	-1.86553	0.000676211	-1.50266	0.003842	-1.40347	5.1116e-08	2.09915	7.04314e-06	1.77061	0.0941794	1.20822	0.00111485	1.47418	0.96167	1.00535	0.106161	1.2274	0.132278	1.2098	0.817472	1.02595	0.00136196	1.46278	0.00404791	1.46001
ENSMUST00000003620 // Mm.28456 // bladder| bone| bone marrow| brain| embryonic tissue|	ENSMUST00000003620 // Prodh // proline dehydrogenase // 16 A3|16 10.73 cM // 19125 ///	ENSMUST00000003620	Prodh	190.019	186.201	1.0205	7.95541e-18	-6.53858	4.38903e-14	-4.19491	6.68846e-05	-1.7458	0.000104692	-1.7143	0.00604008	-1.43691	0.0698309	-1.26202	6.87659e-05	-1.74384	0.00861066	-1.41254	0.00238877	-1.50012	0.000247655	-1.65455	0.444804	-1.10116	0.838996	1.02586	0.354386	-1.12412	0.152079	-1.20004	0.0789783	-1.25255	0.00148868	1.61518	0.00656098	1.4961	0.00670311	1.42977	0.457522	1.0982	0.0252138	-1.38608
NM_010599 // Mm.232472 // brain| embryonic tissue| eye| skin| spinal cord| testis| thym	NM_010599 // Kcnab3 // potassium voltage-gated channel, shaker-related subfamily, beta	NM_010599	Kcnab3	86.6291	30.3041	2.85866	4.55298e-16	-6.44841	1.31646e-12	-4.19969	5.72583e-07	-2.30887	1.43028e-06	-2.21804	0.286514	-1.16357	0.42459	1.11978	2.5885e-11	-3.63068	3.09686e-06	-2.14405	1.99996e-07	-2.41785	1.58344e-10	-3.33334	0.766207	1.04287	1.0898e-05	2.02818	0.147594	1.23014	1.88884e-06	2.19114	0.751502	-1.04572	0.187352	-1.2354	0.375356	-1.15172	0.701367	1.05565	0.796331	1.0371	0.725541	1.05728
ENSMUST00000171470 // Mm.172 // adipose tissue| bladder| bone| bone marrow| brain| conn	ENSMUST00000171470 // Lox // lysyl oxidase // 18 D1|18 29.0 cM // 16948 /// NM_010728 /	ENSMUST00000171470	Lox	29.8693	28.2408	1.05767	7.75653e-07	-6.41303	1.76086e-05	-4.70057	0.000489397	-3.33202	0.745701	-1.10886	0.775086	-1.0953	0.733412	-1.11464	0.0887373	-1.73726	0.146559	-1.59785	0.244383	-1.45346	0.266485	-1.42857	0.350904	-1.34812	0.584369	-1.19067	0.0122957	-2.29482	0.0103973	-2.34397	0.00515374	-2.55437	0.0734664	-1.92305	0.0774178	-1.90554	0.0445175	-1.92872	0.0164612	-2.21023	0.257156	-1.50502
ENSMUST00000028062 // Mm.268000 // adipose tissue| adrenal gland| bladder| blood| bone|	ENSMUST00000028062 // Vim // vimentin // 2 A2|2 7.0 cM // 22352 /// NM_011701 // Vim //	ENSMUST00000028062	Vim	2318.64	1664.88	1.39268	4.19175e-13	-6.40042	6.12051e-07	-2.82043	0.00566683	-1.66608	0.313279	1.19494	0.958935	-1.00908	0.774975	1.05146	0.96303	-1.00817	0.221131	-1.24206	0.723769	1.06403	0.66093	-1.0801	1.77552e-06	-2.6613	0.0147873	-1.55999	1.34029e-05	-2.38193	0.021547	-1.51806	0.460279	-1.13884	0.0799733	-1.4221	0.110216	-1.37734	0.284096	-1.20846	0.174656	-1.27256	0.692178	-1.08126
NM_175007 // Mm.101650 // adrenal gland| brain| dorsal root ganglion| embryonic tissue|	NM_175007 // Amph // amphiphysin // 13 A2|13 10.0 cM // 218038 /// ENSMUST00000003345 /	NM_175007	Amph	316.37	277.317	1.14083	4.54511e-24	-6.36375	4.42443e-19	-3.80792	6.29774e-10	-1.94198	0.000627895	1.3546	3.02033e-05	1.46985	0.00761718	1.25821	0.0368186	-1.19295	0.0519793	-1.17774	0.000345293	-1.37724	1.75428e-07	-1.67746	1.66919e-07	1.6796	2.09559e-07	1.66986	2.64503e-06	1.56519	0.0316004	1.19956	0.039384	-1.19002	0.879686	-1.01407	0.00100362	1.38562	0.191007	-1.11471	0.726793	-1.02914	0.0369911	-1.21902
NM_028709 // Mm.36544 // brain| connective tissue| embryonic tissue| eye| heart| inner	NM_028709 // Btbd11 // BTB (POZ) domain containing 11 // 10 C1|10 // 74007 /// ENSMUST0	NM_028709	Btbd11	222.767	157.441	1.41492	9.63933e-25	-6.35376	2.04115e-18	-3.40052	0.000142278	-1.39031	0.868183	1.01314	0.00261811	1.28563	0.374865	-1.07266	0.000131204	-1.39321	0.0349509	-1.18619	7.33979e-09	-1.7746	5.89568e-06	-1.50575	1.85422e-10	-1.94831	5.38204e-13	-2.28181	0.841162	1.01589	0.433543	-1.06379	0.938201	-1.00612	1.65697e-11	-2.27257	7.149e-09	-1.90639	0.009417	-1.23794	0.588165	1.04359	0.359802	-1.08476
NM_001081016 // Mm.432075 // bone marrow| brain| embryonic tissue| extraembryonic tissu	NM_001081016 // Zc3h7b // zinc finger CCCH type containing 7B // 15 E1|15 // 20286 ///	NM_001081016	Zc3h7b	95.0647	494.981	0.192057	1.41944e-23	-6.32819	1.3997e-18	-3.78033	1.05277e-09	-1.95182	4.69453e-06	-1.56172	0.0184661	-1.22933	0.0878391	-1.15835	4.90829e-07	1.65724	1.49459e-11	2.19895	3.64789e-11	2.14343	3.9536e-13	2.44932	0.333005	-1.08578	0.788842	1.0229	0.208245	-1.11342	0.0102152	-1.25438	0.00073346	-1.36037	0.000992054	-1.39923	0.103492	-1.17032	0.285672	-1.09514	0.112328	-1.14613	0.692455	-1.03831
NM_181748 // Mm.35288 // embryonic tissue| intestine| joint| lung| mammary gland| pitui	NM_181748 // O3far1 // omega-3 fatty acid receptor 1 // 19 C2-C3|19 // 107221 /// ENSMU	NM_181748	O3far1	84.2882	25.1023	3.35778	4.5063e-17	-6.32153	7.26088e-15	-4.8224	0.000188758	-1.70351	0.000195846	1.70083	1.90055e-05	1.87528	0.184486	1.19066	3.53621e-13	-3.98884	7.39776e-11	-3.1336	5.10163e-10	-2.88481	1.69278e-10	-3.02367	7.466e-05	1.77176	8.85297e-07	2.12419	0.000972181	1.58548	1.89293e-07	2.26077	0.293787	1.14736	0.367742	-1.14141	0.732386	-1.05126	0.121777	-1.2267	0.693077	1.0527	0.231278	1.19303
NM_008710 // Mm.132584 // bladder| blood| bone| bone marrow| brain| connective tissue|	NM_008710 // Nnt // nicotinamide nucleotide transhydrogenase // 13 D2|13 64.0 cM // 181	NM_008710	Nnt	699.654	266.326	2.62706	9.97395e-17	-6.29712	9.03014e-10	-2.88221	0.553603	-1.08211	0.1116	-1.23985	0.695611	-1.05343	0.352118	1.13244	0.00359063	-1.5058	0.00392327	-1.49928	0.444944	1.10729	0.404422	-1.11775	1.95313e-05	1.8997	4.53785e-07	2.22077	0.000728692	1.62321	0.0011819	1.58754	0.535427	-1.08608	0.0561508	1.33924	0.17542	1.22727	0.256795	1.16415	0.394524	-1.12042	0.661826	-1.06759
NM_013886 // Mm.392934 // bladder| bone marrow| brain| dorsal root ganglion| embryonic	NM_013886 // Hdgfrp3 // hepatoma-derived growth factor, related protein 3 // 7 D3|7 //	NM_013886	Hdgfrp3	79.1003	77.1615	1.02513	1.24269e-15	-6.27171	1.22019e-11	-3.84776	0.000480076	-1.72131	0.00526303	-1.52394	0.461984	-1.11168	0.565555	-1.0861	3.19122e-06	-2.16837	0.116198	-1.2573	0.0512076	-1.332	0.00652445	-1.50626	0.00932118	1.47679	0.0846532	1.2868	0.203744	-1.20228	0.0681055	-1.30657	0.0242571	-1.39665	0.00279129	1.66718	0.279154	1.19213	0.98869	1.00204	0.0575861	-1.32159	0.10086	-1.30878
NM_001134741 // Mm.252800 // brain| fertilized ovum| ovary| testis| thymus|oocyte| unfe	NM_001134741 // Tdrd5 // tudor domain containing 5 // 1 G3|1 // 214575 /// BC099972 //	NM_001134741	Tdrd5	739.321	251.721	2.93707	2.86389e-28	-6.27148	2.39876e-23	-3.85374	5.3363e-08	-1.51904	0.885254	-1.00909	0.00148069	1.23742	0.0597343	1.12839	0.0264179	-1.15457	0.0144521	1.17288	0.00627346	1.19718	0.00302921	1.21769	1.54124e-18	2.6745	1.03049e-19	2.90012	0.000344793	1.27677	2.78393e-06	1.40627	0.000406119	-1.27239	1.27996e-12	2.04844	1.8352e-17	2.79159	0.0147405	1.17229	1.91117e-09	1.62273	0.399742	-1.0614
NM_145076 // Mm.41063 // adrenal gland| bone| bone marrow| brain| dorsal root ganglion|	NM_145076 // Trim24 // tripartite motif-containing 24 // 6 B1|6 // 21848 /// ENSMUST000	NM_145076	Trim24	644.37	954.479	0.675101	4.93846e-20	-6.21392	1.69274e-13	-3.15445	0.0253939	-1.27531	0.633772	1.05152	0.0972333	1.19455	0.177703	1.15443	0.0139448	-1.30912	0.000281352	-1.5182	0.00186486	-1.41794	1.44327e-05	-1.67931	0.985294	1.00194	0.025488	-1.2751	0.335651	1.10737	0.000726221	-1.46792	0.937038	1.00835	0.272721	-1.13971	0.920793	-1.01183	0.67835	-1.04468	0.121586	-1.18007	0.968559	-1.00467
---	NR_046302 // AF357425 // snoRNA AF357425 // 12 54.5 cM // 449562	NR_046302	AF357425	389.88	705.739	0.552443	7.52725e-13	-6.19266	6.04584e-10	-4.15055	0.00338645	-1.72509	0.000617791	-1.91696	6.20856e-05	-2.19036	0.28474	1.20864	0.99808	1.00042	0.76228	-1.05466	0.00238928	1.76397	0.943435	-1.01255	3.22519e-09	-3.77515	7.72399e-09	-3.59521	0.841897	-1.0357	0.00192808	-1.78797	0.49022	1.12941	0.0119556	-1.67802	0.548078	-1.12631	0.00169186	1.80263	0.0301729	1.48154	0.743089	-1.06695
NM_026505 // Mm.284863 // bone marrow| brain| connective tissue| dorsal root ganglion|	NM_026505 // Bambi // BMP and activin membrane-bound inhibitor, homolog (Xenopus laevis	NM_026505	Bambi	378.816	212.244	1.78482	5.14911e-24	-6.06546	1.52336e-18	-3.52625	2.80821e-05	-1.45983	0.639511	1.03837	0.041884	-1.18272	0.207562	-1.10763	0.239287	-1.10001	6.47223e-05	-1.42888	0.0553677	-1.17063	0.00758224	-1.25187	1.50809e-07	1.66425	0.00112155	1.32394	1.71426e-10	1.97963	0.00246394	1.29464	0.839316	-1.01642	0.582332	1.05096	0.708231	1.03436	0.00605546	1.26055	0.806095	1.01991	0.929542	-1.00801
ENSMUST00000111063 // Mm.45628 // adrenal gland| brain| embryonic tissue| eye| heart| l	ENSMUST00000111063 // Mpped2 // metallophosphoesterase domain containing 2 // 2 E3|2 59	ENSMUST00000111063	Mpped2	224.695	109.295	2.05585	6.5238e-20	-6.05269	5.96875e-12	-2.74166	0.0923486	-1.19645	0.0208508	-1.28445	0.012164	-1.31437	0.126074	-1.17644	0.000562927	-1.47767	0.00147686	-1.42703	0.0107407	-1.32118	0.015128	-1.30235	7.54729e-06	1.70978	0.13648	1.17121	5.14481e-10	2.34491	0.000274157	1.51549	0.45009	-1.08253	0.00377388	-1.43309	0.550031	-1.07296	0.143808	-1.16773	0.46805	1.07915	0.111078	-1.20975
NM_001033135 // Mm.28614 // blood| bone| bone marrow| brain| dorsal root ganglion| embr	NM_001033135 // Rnf149 // ring finger protein 149 // 1 B|1 // 67702 /// ENSMUST00000062	NM_001033135	Rnf149	196.035	197.198	0.994102	2.06396e-21	-5.89276	8.84801e-16	-3.34698	0.000609467	-1.41337	0.00376658	-1.33095	0.0100342	-1.28544	0.141588	-1.14934	0.00244061	-1.35076	2.21518e-05	-1.5637	0.002322	-1.35303	7.61146e-06	-1.61361	0.470502	-1.06995	0.001152	-1.38473	0.142161	1.1491	0.176893	-1.13609	0.971436	1.00335	0.164948	-1.15896	0.131338	-1.17428	0.828381	1.02045	0.986615	-1.00157	0.735401	-1.03612
ENSMUST00000114025 // Mm.211712 // blood| bone marrow| brain| embryonic tissue| eye| fe	ENSMUST00000114025 // Prrg1 // proline rich Gla (G-carboxyglutamic acid) 1 // X B|X //	ENSMUST00000114025	Prrg1	208.326	55.0141	3.78677	1.37173e-17	-5.87225	3.35514e-15	-4.45254	9.74128e-07	-2.00198	0.267109	1.14417	0.0800468	1.23986	0.0326064	1.30353	0.0464928	-1.27888	0.219775	-1.1609	0.382617	-1.11142	0.135797	-1.19986	3.99419e-05	1.74	1.27278e-08	2.35644	0.313494	1.12993	1.37265e-05	1.81242	0.491203	-1.08669	1.69329e-05	1.93326	5.93647e-09	2.70679	0.0365028	1.29575	1.47087e-07	2.14874	0.703547	-1.05288
NM_011580 // Mm.4159 // blood| bone| bone marrow| brain| connective tissue| embryonic t	NM_011580 // Thbs1 // thrombospondin 1 // 2 F1-F3|2 65.0 cM // 21825 /// ENSMUST0000003	NM_011580	Thbs1	229.064	593.482	0.385966	2.48952e-06	-5.82122	0.0171331	-2.21731	0.241257	-1.46302	0.878551	-1.05041	0.910512	1.03684	0.968812	1.01266	0.212154	1.50021	0.0658921	1.83141	0.234891	1.47079	0.732055	-1.11658	0.141719	-1.6154	0.402572	-1.31075	0.00712646	-2.47993	0.00205607	-2.87522	0.00931311	-2.39857	2.91089e-07	-9.21162	6.45238e-05	-4.99246	8.12166e-07	-6.51173	1.0368e-05	-5.04273	0.783587	-1.10447
NM_177753 // Mm.70950 // brain| dorsal root ganglion| embryonic tissue| extraembryonic	NM_177753 // Sox21 // SRY-box containing gene 21 // 14 E4|14 // 223227 /// ENSMUST00000	NM_177753	Sox21	452.194	64.6106	6.99875	1.37494e-13	-5.80059	1.98033e-08	-3.05506	0.910519	1.01815	0.000936963	-1.76696	0.0110918	-1.52798	0.302377	-1.18076	0.1181	-1.28924	0.0523627	-1.37457	0.0261476	-1.44419	0.0190651	-1.47526	0.322883	1.17254	0.100079	-1.30707	0.115713	1.29145	0.112129	-1.29486	0.430044	-1.13515	0.862534	1.03162	0.798985	-1.04687	0.0477751	1.3839	0.318142	1.1744	0.695618	1.07294
NM_001162980 // Mm.65181 // embryonic tissue| fertilized ovum| mammary gland| ovary| te	NM_001162980 // 1700024P16Rik // RIKEN cDNA 1700024P16 gene // 4 C6|4 // 242594 /// ENS	NM_001162980	1700024P16Rik	50.5587	27.7944	1.81903	2.20087e-18	-5.7688	8.83041e-11	-2.6774	0.0596281	-1.24302	0.000211943	-1.58108	0.000293999	-1.56184	0.467966	-1.08566	0.566249	1.06702	0.351545	1.11152	0.218339	1.15061	0.0394678	1.26989	0.0485834	1.25646	0.0873802	1.21728	0.0305776	1.28612	0.0315101	1.28423	0.536877	-1.07236	0.130125	1.21509	0.510652	1.08725	0.899684	-1.01433	0.401116	-1.09987	0.0213256	-1.35289
NM_133750 // Mm.247535 // bladder| bone| bone marrow| brain| connective tissue| dorsal	NM_133750 // Fam118a // family with sequence similarity 118, member A // 15|15 E3 // 73	NM_133750	Fam118a	242.508	240.23	1.00949	2.12354e-23	-5.60833	1.85392e-18	-3.4775	0.000323939	-1.36739	0.289283	1.08898	0.156921	1.12133	0.378316	-1.07327	0.0240217	-1.20481	0.0376044	-1.18624	0.88195	-1.01193	0.318038	-1.08356	0.251377	1.09678	0.431867	-1.06504	0.579321	-1.04536	0.00335151	-1.28138	0.123177	-1.13317	0.0132732	1.26025	0.775474	1.02594	0.0494977	1.17452	0.248082	-1.0975	0.513843	-1.0605
NM_021463 // Mm.287178 // bladder| bone marrow| brain| connective tissue| dorsal root g	NM_021463 // Prps1 // phosphoribosyl pyrophosphate synthetase 1 // X F1-F2|X 60.0 cM //	NM_021463	Prps1	500.526	1873.47	0.267164	9.65401e-21	-5.59121	1.57641e-15	-3.32933	0.00274059	-1.35104	5.07315e-07	-1.7594	0.0660887	-1.19465	0.521527	1.06273	1.74038e-06	-1.69675	0.000176795	-1.47688	0.0031133	-1.34512	0.0194795	-1.25761	0.000376746	-1.4422	0.1753	-1.13866	0.00173121	-1.37227	0.0941847	-1.17511	0.819736	1.02181	0.877989	1.01647	0.162079	1.16255	0.866478	-1.01605	0.695007	1.03785	0.571136	-1.06223
NM_016778 // Mm.3295 // bladder| bone marrow| brain| embryonic tissue| extraembryonic t	NM_016778 // Bok // BCL2-related ovarian killer protein // 1 D|1 // 51800 /// ENSMUST00	NM_016778	Bok	681.092	180.927	3.76447	1.52074e-16	-5.54429	1.92164e-11	-3.18369	0.0010301	-1.55552	1.10952e-08	-2.454	0.000182725	-1.67345	0.233398	-1.16269	0.000164779	-1.68059	0.00192846	-1.51312	0.599677	1.06812	0.889465	1.01757	6.08541e-08	-2.29499	0.00160747	-1.52543	0.00509713	-1.44723	0.000472904	-1.60833	0.118356	-1.22002	0.00820733	-1.47663	0.15705	-1.22371	0.637982	1.06083	0.0382743	-1.30613	0.139396	-1.23507
NM_001080934 // Mm.25773 // bone marrow| brain| intestine| kidney| liver| mammary gland	NM_001080934 // Slc16a5 // solute carrier family 16 (monocarboxylic acid transporters),	NM_001080934	Slc16a5	40.693	21.494	1.89323	1.19075e-14	-5.53086	5.77605e-13	-4.49427	0.000677101	-1.6938	0.769463	1.04301	0.169622	1.22099	0.937959	1.01124	0.369337	-1.13837	0.258323	1.17784	0.999923	-1.00001	0.556848	1.08824	0.719533	1.05296	0.700192	-1.05691	0.738226	1.0492	0.677246	-1.06167	0.552009	-1.08938	0.780148	-1.04609	0.498578	-1.11574	0.771096	1.04269	0.869693	-1.02384	0.976068	1.00485
ENSMUST00000095097 // Mm.354634 // eye| thyroid| juvenile| adult /// NM_183298 // Mm.35	ENSMUST00000095097 // Foxe1 // forkhead box E1 // 4 B1|4 21.5 cM // 110805 /// NM_18329	ENSMUST00000095097	Foxe1	42.0349	34.0731	1.23367	1.04492e-20	-5.50988	1.5498e-18	-4.37564	3.79639e-09	-2.02553	0.0859716	-1.17899	0.957105	1.00507	0.169974	-1.13961	0.00553064	-1.31596	0.451766	-1.07363	0.0801516	-1.18285	0.244325	-1.11683	0.0991387	1.17105	0.0303458	1.23376	0.406788	1.08154	0.0139216	1.27216	0.603084	-1.05022	0.469435	-1.07974	0.403029	-1.09285	0.247521	-1.11598	0.901573	-1.0117	0.981163	-1.0025
ENSMUST00000006742 // Mm.87854 // brain| embryonic tissue| extraembryonic tissue| eye|	ENSMUST00000006742 // Atp7b // ATPase, Cu++ transporting, beta polypeptide // 8 A2|8 10	ENSMUST00000006742	Atp7b	154.444	55.2928	2.7932	1.47198e-16	-5.50229	1.0298e-13	-3.98648	1.99904e-06	-1.99531	0.175612	1.18631	0.0597641	1.27144	0.788218	1.03407	0.00013142	-1.69139	0.00197473	-1.50813	3.03236e-07	-2.14653	3.61464e-05	-1.78144	1.40136e-06	2.02298	2.92223e-06	1.96612	0.213143	1.16971	0.0158961	1.3665	0.56898	-1.07374	0.00261013	1.56458	0.0268593	1.37731	0.268706	-1.14909	0.509544	-1.08594	0.434401	-1.11618
NM_019521 // Mm.3982 // adrenal gland| bladder| bone| bone marrow| brain| embryonic tis	NM_019521 // Gas6 // growth arrest specific 6 // 8 A1.1|8 5.0 cM // 14456 /// ENSMUST00	NM_019521	Gas6	91.5142	160.337	0.570763	1.17428e-13	-5.49719	4.98087e-08	-2.80759	0.00161438	-1.68137	0.000710991	-1.75699	0.162356	-1.24399	0.28357	-1.18139	0.0119409	-1.49825	0.710901	-1.05891	0.0858726	-1.31016	0.293224	-1.17743	0.00380597	-1.60294	0.44174	-1.12653	0.000780479	-1.74834	0.00292561	-1.62696	0.494574	-1.1115	0.81019	1.04253	0.15159	1.28652	0.473472	-1.11736	0.243809	-1.19892	0.325568	-1.18709
NR_027959 // Mm.310200 // brain| eye| pancreas| adult	NR_027959 // B830017H08Rik // RIKEN cDNA B830017H08 gene // 16 A3|16 // 433004	NR_027959	B830017H08Rik	82.9357	22.6306	3.66477	1.75453e-28	-5.49536	8.73693e-24	-3.56327	1.51317e-10	-1.63367	2.31014e-09	-1.5526	0.0020488	-1.20745	0.495893	-1.04	7.45859e-15	-2.00225	1.31991e-07	-1.443	2.57771e-05	-1.3128	4.24913e-09	-1.53535	0.0428122	1.1269	0.433776	1.04616	0.000672479	1.23471	0.0485514	1.12319	0.393281	-1.05048	0.475007	1.04733	0.990986	1.00073	0.0685644	1.11278	0.476308	1.04189	0.219491	-1.08329
NM_001193271 // Mm.356578 // bone marrow| brain| connective tissue| embryonic tissue| e	NM_001193271 // Meis1 // Meis homeobox 1 // 11 A3.1|11 11.0 cM // 17268 /// ENSMUST0000	NM_001193271	Meis1	494.332	45.4989	10.8647	8.23678e-19	-5.48192	1.21674e-12	-2.96092	0.16792	-1.1602	0.00243617	-1.40891	0.406597	-1.09278	0.243448	-1.13343	4.89825e-06	-1.75088	0.0173173	-1.30069	0.00105317	-1.45409	0.0162428	-1.30433	0.0136172	-1.3143	0.000781687	-1.47012	0.781112	-1.03003	0.00294247	-1.39869	0.71731	1.03932	0.17025	-1.18061	0.600562	1.06474	0.204269	-1.1463	0.342184	-1.10704	0.147373	-1.19203
NM_001111060 // Mm.247265 // bone| bone marrow| brain| connective tissue| embryonic tis	NM_001111060 // Cd59a // CD59a antigen // 2|2 55.0 cM // 12509 /// ENSMUST00000168176 /	NM_001111060	Cd59a	566.159	489.641	1.15627	2.12227e-21	-5.46286	1.62076e-18	-4.06214	3.5698e-12	-2.40703	1.21168e-08	-1.89314	8.40567e-05	-1.47718	0.382726	-1.08163	0.000312405	1.42135	0.00015718	1.45051	0.0109905	1.26788	1.44066e-05	1.55342	3.48661e-11	2.24449	5.26432e-05	1.49723	0.00208443	1.34061	0.555777	1.05424	0.026904	-1.22679	4.65365e-07	1.82677	0.00796056	1.3223	0.0537041	1.19342	0.838822	1.01837	0.257467	-1.12162
NM_170758 // Mm.294439 // blood| brain| eye| heart| intestine| joint| kidney| liver| lu	NM_170758 // Cd300a // CD300A antigen // 11 E2|11 78.0 cM // 217303 /// ENSMUST00000106	NM_170758	Cd300a	128.486	31.1422	4.12579	1.05483e-15	-5.41279	1.38329e-13	-4.22814	1.14774e-07	-2.32552	0.00300836	-1.51087	0.167222	-1.20146	0.080433	-1.26372	0.160913	-1.20487	0.0378791	1.3235	0.355845	-1.12959	0.0566794	1.29192	0.490766	1.09496	0.0681565	1.27716	0.989129	-1.00179	0.00869772	1.43375	0.759345	-1.04105	0.740918	-1.05	0.197182	-1.21197	0.90323	1.01609	0.539806	1.08401	0.429309	1.12415
NM_053110 // Mm.302602 // bladder| blood| bone| bone marrow| brain| connective tissue|	NM_053110 // Gpnmb // glycoprotein (transmembrane) nmb // 6 B2.3|6 21.0 cM // 93695 ///	NM_053110	Gpnmb	226.768	41.4819	5.46668	1.07238e-13	-5.35865	1.6323e-11	-4.08947	0.370999	-1.14597	1.77296e-09	3.23412	2.24092e-08	2.86258	0.000159284	1.87629	0.0590676	-1.34011	0.0294126	-1.40551	0.294179	-1.17361	0.112928	-1.27653	1.80769e-05	2.08592	0.353033	1.15201	0.000159381	1.87623	0.809452	-1.03723	0.752882	-1.04889	0.00912675	1.59068	0.0440591	1.42191	0.237975	1.19773	0.97972	-1.00386	0.19019	-1.25299
NM_007392 // Mm.213025 // adipose tissue| bladder| bone| bone marrow| brain| connective	NM_007392 // Acta2 // actin, alpha 2, smooth muscle, aorta // 19|19 C3 // 11475 /// ENS	NM_007392	Acta2	121.342	1580.1	0.0767939	5.75769e-06	-5.35542	0.085379	-1.75889	0.583299	-1.1936	0.142505	-1.6142	0.223056	-1.48604	0.69807	1.13318	0.994446	-1.00224	0.703356	-1.13057	0.445143	1.27989	0.857068	-1.05972	0.00222005	-2.85135	0.0174583	-2.21265	0.000196955	-3.72398	0.00102253	-3.11373	0.267591	-1.43306	0.0304025	-2.24244	0.223368	-1.56013	0.057448	-1.87069	0.297035	-1.40234	0.806933	1.09248
NM_024272 // Mm.343095 // adipose tissue| brain| embryonic tissue| eye| inner ear| inte	NM_024272 // Ssbp2 // single-stranded DNA binding protein 2 // 13 C3|13 // 66970 /// EN	NM_024272	Ssbp2	370.639	235.516	1.57373	1.82228e-18	-5.30586	1.49794e-14	-3.53728	0.000207938	-1.54417	0.00470198	-1.37496	0.607359	1.05655	0.2358	1.13639	0.0261718	-1.27821	0.924888	1.01013	0.186454	-1.1535	0.223492	-1.14037	1.84682e-09	2.28524	2.30932e-09	2.2678	8.35953e-09	2.17067	1.10343e-05	1.70777	0.0109728	-1.32794	0.00734338	-1.40144	0.150154	1.19141	0.000572285	-1.48927	0.273891	-1.12507	0.0186256	-1.34042
NM_145953 // Mm.28301 // bone marrow| brain| embryonic tissue| epididymis| eye| intesti	NM_145953 // Cth // cystathionase (cystathionine gamma-lyase) // 3 H4|3 // 107869 /// E	NM_145953	Cth	281.009	2303.16	0.12201	2.34053e-14	-5.28672	9.08328e-08	-2.53314	0.47137	1.10881	0.00486535	-1.52811	0.456881	-1.11262	0.710878	-1.05446	2.72402e-11	-3.68278	1.99282e-11	-3.739	1.00368e-10	-3.45967	2.93952e-07	-2.40419	0.66358	1.06422	0.376104	-1.13558	0.0506553	-1.33161	0.00488932	-1.52771	0.505067	-1.10025	0.0392309	1.40555	0.381566	1.15168	0.441534	-1.11675	0.0773629	-1.29385	0.222621	-1.21867
NM_181039 // Mm.260733 // adrenal gland| bladder| bone marrow| brain| embryonic tissue|	NM_181039 // Lphn1 // latrophilin 1 // 8 C3|8 // 330814 /// ENSMUST00000141158 // Lphn1	NM_181039	Lphn1	329.046	605.176	0.54372	4.94577e-17	-5.28622	5.69639e-11	-2.84227	0.0411125	-1.2803	2.00021e-07	-2.08894	0.00739555	-1.39176	0.378826	-1.10974	0.269406	-1.14003	0.0350416	1.29107	0.0289985	1.3037	0.18741	1.16995	0.000205153	-1.61471	0.110952	-1.21019	0.17416	-1.17577	0.574639	-1.06845	0.719925	1.04315	0.00896613	-1.43557	0.425932	-1.11155	0.662326	1.05282	0.333175	1.12145	0.30003	1.14803
NM_019989 // Mm.260760 // adrenal gland| bladder| blood| bone| bone marrow| brain| conn	NM_019989 // Sh3bgrl // SH3-binding domain glutamic acid-rich protein like // X D|X //	NM_019989	Sh3bgrl	846.556	442.711	1.91221	5.72861e-17	-5.25907	1.52426e-16	-5.00753	0.000883154	-1.52478	0.000733434	-1.5363	0.0374824	-1.28699	0.642479	1.05633	0.00762923	-1.39043	0.0139565	-1.35194	0.105126	-1.2145	0.0469684	-1.27165	0.195424	1.16685	0.0237791	1.3173	0.0748178	1.23915	0.656694	1.05387	0.137764	-1.19422	0.389043	-1.12148	0.216048	1.17999	0.183945	1.17169	0.192423	1.16809	0.788893	1.03612
NM_001164427 // Mm.312335 // bone| brain| embryonic tissue| fertilized ovum| lung| mamm	NM_001164427 // Kcnk13 // potassium channel, subfamily K, member 13 // 12 E|12 // 21782	NM_001164427	Kcnk13	61.7813	39.3737	1.5691	2.33828e-13	-5.23278	1.49073e-13	-5.36694	0.000193924	-1.8719	0.000752639	-1.74568	0.0492464	-1.36241	0.943591	1.01091	1.09373e-06	-2.40742	8.72374e-07	-2.4335	2.76673e-05	-2.06138	1.92171e-06	-2.34359	0.0459795	1.36899	0.0194268	1.44985	0.00094852	1.72448	0.0142508	1.47836	0.797547	-1.04014	0.473832	-1.13181	0.871345	1.0283	0.137167	1.26015	0.267004	1.18717	0.62296	1.08855
NM_001252292 // Mm.335639 // bone| brain| connective tissue| dorsal root ganglion| embr	NM_001252292 // Mest // mesoderm specific transcript // 6 B1|6 7.5 cM // 17294 /// NM_0	NM_001252292	Mest	465.625	396.24	1.17511	5.36007e-21	-5.2089	4.04926e-17	-3.56155	0.111799	-1.15523	3.30897e-13	-2.59107	3.47915e-08	-1.8354	0.678854	-1.03769	3.82376e-05	-1.50966	1.88044e-06	-1.64276	0.326613	1.09211	0.0362431	-1.21212	0.00844761	-1.27896	0.425403	1.07406	2.42322e-07	1.73883	1.82662e-07	1.75253	0.680083	-1.03753	7.32648e-05	-1.55562	0.000853083	-1.43346	0.00221047	1.33725	0.483402	1.06477	0.304854	-1.10918
NM_031252 // Mm.125482 // brain| lung| mammary gland| thymus| juvenile| adult /// ENSMU	NM_031252 // Il23a // interleukin 23, alpha subunit p19 // 10 D3|10 // 83430 /// ENSMUS	NM_031252	Il23a	94.0008	136.397	0.68917	1.02855e-15	-5.20459	5.37473e-12	-3.45429	0.000820804	-1.58662	4.88169e-07	-2.15118	5.42888e-06	-1.9542	0.00653058	-1.44165	0.769663	-1.03824	0.46479	1.09852	0.000337062	1.64912	5.26663e-06	1.95657	6.6787e-09	2.55511	4.48883e-05	1.79413	0.513193	-1.08762	0.00266154	-1.50453	0.00882	-1.42042	4.31702e-08	2.6365	0.000538362	1.71497	0.347429	1.12868	0.0338508	-1.32303	0.222555	-1.19395
NM_011267 // Mm.181709 // bone| brain| connective tissue| embryonic tissue| extraembryo	NM_011267 // Rgs16 // regulator of G-protein signaling 16 // 1 G3|1 78.0 cM // 19734 //	NM_011267	Rgs16	703.417	180.78	3.89101	3.35834e-20	-5.19339	6.64785e-14	-2.87792	6.9453e-05	-1.51487	0.0567219	-1.20108	0.33859	-1.09461	0.550445	-1.05781	8.66824e-09	1.97372	7.44512e-08	1.85241	2.50531e-10	2.19698	2.18019e-10	2.20642	4.31009e-08	-1.88237	1.98773e-05	-1.57274	0.000464212	-1.42849	1.58823e-08	-1.9386	0.0158925	-1.26521	0.00777804	-1.34207	0.583739	-1.05963	0.0427357	1.21585	0.570877	-1.05478	0.838615	-1.02173
NM_133189 // Mm.214994 // brain| dorsal root ganglion| embryonic tissue| extraembryonic	NM_133189 // Cacng7 // calcium channel, voltage-dependent, gamma subunit 7 // 7 A1|7 2.	NM_133189	Cacng7	721.392	1197.16	0.602586	1.93767e-21	-5.16133	3.78728e-11	-2.17501	0.0633697	-1.17792	0.233458	-1.10927	0.391626	1.07706	0.241514	1.10728	3.09994e-07	-1.69533	2.7408e-05	-1.50243	0.00440094	-1.29575	0.000388401	-1.39471	0.138883	1.13822	0.575509	1.04958	0.0322286	1.20963	0.530182	-1.05577	0.801802	-1.02189	0.249061	1.11925	0.625186	1.04855	0.228347	1.11057	0.156222	-1.13189	0.354114	-1.09449
NM_011048 // Mm.294007 // adipose tissue| brain| embryonic tissue| extraembryonic tissu	NM_011048 // Pcsk6 // proprotein convertase subtilisin/kexin type 6 // 7 C|7 28.5 cM //	NM_011048	Pcsk6	386.634	545.517	0.708749	1.90972e-21	-5.15981	9.44453e-12	-2.26437	1.11043e-05	-1.53949	2.76984e-08	-1.80854	0.00569402	-1.2848	0.522354	-1.05684	5.21649e-09	-1.8926	0.000597454	-1.37706	0.0210189	-1.2287	4.44101e-05	-1.48229	0.000137607	-1.43633	2.12736e-10	-2.06899	4.9663e-06	-1.57332	6.82428e-11	-2.13732	0.620231	1.0437	0.7976	-1.02516	0.658762	-1.04375	0.00632661	-1.28038	0.0206902	-1.2294	0.363702	-1.09247
ENSMUST00000038275 // Mm.212855 // blood| bone| bone marrow| brain| connective tissue|	ENSMUST00000038275 // Mylip // myosin regulatory light chain interacting protein // 13	ENSMUST00000038275	Mylip	262.617	148.523	1.76819	4.34005e-19	-5.15958	2.61535e-17	-4.27418	2.30276e-07	-1.86997	0.076077	-1.2001	0.109801	-1.17797	0.71244	-1.03786	0.961676	-1.00485	0.0280325	-1.25659	0.107179	-1.17945	0.0524393	-1.22169	0.00169741	1.40139	0.103099	1.18183	0.0291936	1.25437	0.00326016	-1.36861	0.00171808	-1.40078	0.737917	-1.03863	0.42632	1.09462	0.637636	-1.04866	0.0062674	-1.33541	0.0425437	-1.26594
NM_001159518 // Mm.233470 // adrenal gland| bladder| blood| bone| brain| dorsal root ga	NM_001159518 // Igfbp7 // insulin-like growth factor binding protein 7 // 5 C3.3|5 // 2	NM_001159518	Igfbp7	114.05	156.038	0.730911	3.163e-08	-5.01351	3.29663e-05	-3.00368	0.00892699	-1.90653	0.524293	1.16256	0.405179	1.21808	0.610322	1.12799	0.0152444	-1.81311	0.0198292	-1.76742	0.0271286	-1.71303	0.238896	-1.32364	2.13721e-06	-3.67886	0.000281364	-2.54869	1.22435e-06	-3.83237	6.0852e-05	-2.86786	0.748227	1.07872	9.24103e-05	-3.15204	0.00886693	-2.06627	0.0115352	-1.86169	0.245706	-1.31823	0.0192426	1.90261
NM_172587 // Mm.25335 // bone marrow| brain| embryonic tissue| extraembryonic tissue| e	NM_172587 // Cdc14b // CDC14 cell division cycle 14B // 13 B3|13 // 218294 /// NM_00112	NM_172587	Cdc14b	400.2	540.829	0.739974	3.89165e-20	-4.97378	1.56599e-15	-3.21217	3.7527e-07	-1.74479	7.52711e-05	-1.49746	0.219016	-1.12073	0.850354	-1.01748	0.00309471	-1.33348	0.536863	-1.0585	0.280544	-1.105	0.639168	-1.04406	0.0827799	1.1764	0.000220893	1.44991	0.000417406	-1.42195	0.0149974	-1.26138	0.847165	-1.01786	4.57527e-06	1.7249	1.65963e-07	1.91863	0.32	1.09626	0.238926	1.1153	0.673557	1.04448
NM_013883 // Mm.427014 // bone marrow| brain| dorsal root ganglion| embryonic tissue| e	NM_013883 // Scmh1 // sex comb on midleg homolog 1 // 4 D1-D2|4 56.5 cM // 29871 /// EN	NM_013883	Scmh1	524.134	370.593	1.41431	3.80147e-20	-4.87663	1.38692e-15	-3.17797	3.04704e-07	-1.74244	8.8148e-09	-1.92669	0.000324364	-1.42636	0.308599	-1.09736	6.25527e-12	-2.39255	1.1082e-09	-2.04592	2.97848e-06	-1.63402	1.65638e-07	-1.77263	0.0207469	-1.24244	0.0026709	-1.33498	0.000306015	1.42887	0.607784	1.0477	0.860345	-1.01608	0.00241487	-1.38865	0.00662582	-1.33676	0.0211771	1.24148	0.860469	1.01606	0.65704	-1.04632
NM_007913 // Mm.181959 // bladder| blood| bone| bone marrow| brain| dorsal root ganglio	NM_007913 // Egr1 // early growth response 1 // 18 C/D|18 16.0 cM // 13653 /// ENSMUST0	NM_007913	Egr1	128.112	109.535	1.1696	4.09184e-12	-4.84678	5.89274e-12	-4.74865	4.23603e-10	-3.76607	5.55534e-05	-2.06674	0.0002157	-1.92456	0.0604413	-1.36385	0.0576628	-1.36874	6.16334e-05	-2.05563	0.000216092	-1.92438	0.000224834	-1.92031	1.98987e-06	-2.44812	0.015832	-1.4991	0.254	-1.20418	0.04975	-1.384	0.623726	-1.08259	1.77664e-05	-2.41471	0.423084	-1.15718	0.278414	1.19292	0.0863429	1.32626	0.143648	1.30879
ENSMUST00000060989 // Mm.121920 // adrenal gland| bladder| bone| bone marrow| brain| em	ENSMUST00000060989 // Sorl1 // sortilin-related receptor, LDLR class A repeats-containi	ENSMUST00000060989	Sorl1	806.605	575.08	1.40259	5.51554e-16	-4.76827	2.79175e-09	-2.46991	0.0125644	-1.36245	1.25509e-05	1.80559	1.576e-07	2.12368	0.0431755	1.28023	0.0116296	-1.36746	0.614678	1.06182	0.259606	-1.14478	0.940084	1.00898	1.17224e-12	3.36935	2.30191e-13	3.61281	0.0268307	1.31252	1.81042e-06	1.9404	0.540088	1.07579	3.41598e-06	2.05115	1.99029e-05	1.90498	0.0998464	-1.22047	0.686775	1.04919	0.464094	1.10318
NM_001243857 // Mm.291864 // bladder| brain| embryonic tissue| extraembryonic tissue| e	NM_001243857 // Fam124a // family with sequence similarity 124, member A // 14 D1|14 //	NM_001243857	Fam124a	232.28	50.2224	4.62502	4.04951e-12	-4.74301	2.71591e-05	-2.12153	0.779304	-1.04566	0.000174744	-1.92808	0.585048	-1.09102	0.594606	1.08861	0.00355498	-1.63391	0.548811	-1.10042	0.661519	-1.0723	0.0862191	-1.32115	0.791368	-1.04304	0.112853	-1.29258	0.608491	1.08514	0.442315	-1.13067	0.935047	-1.01306	0.0561376	-1.41903	0.443902	-1.14741	0.241338	-1.20713	0.829985	1.03479	0.88932	1.02522
---	XM_001475753 // Ly6g // lymphocyte antigen 6 complex, locus G // 15 D3|15 // 546644 ///	XM_001475753	Ly6g	146.753	29.1588	5.03287	4.26982e-08	-4.73405	6.29274e-06	-3.30699	0.00819702	-1.89394	0.0637498	-1.54872	0.659598	-1.10711	0.0627513	1.5514	0.000529716	-2.37712	1.60565e-06	-3.64849	5.86219e-06	-3.32395	3.27677e-05	-2.93278	6.14236e-08	4.61145	7.72797e-06	3.25824	1.02595e-08	5.25006	2.35564e-05	3.00461	0.416998	-1.2069	0.290192	-1.3181	0.366052	-1.26562	0.99177	-1.00238	0.456294	-1.18826	0.865407	-1.04493
NR_040617 // Mm.447752 // embryonic tissue| eye| adult	NR_040617 // C330008G21Rik // RIKEN cDNA C330008G21 gene // 2|2 // 77645	NR_040617	C330008G21Rik	34.1441	72.2342	0.472686	3.13534e-17	-4.68865	1.79895e-10	-2.4964	0.00050089	-1.50143	0.62405	1.05431	0.755797	1.0341	0.746005	-1.03554	0.275539	-1.12569	0.599091	-1.05838	0.611049	-1.05642	0.0921507	-1.20303	0.0238363	-1.28628	5.3751e-06	-1.75746	2.38604e-05	1.67086	0.0142829	1.31599	5.4132e-06	1.75704	0.152099	-1.19209	0.991418	-1.0013	0.0176304	1.30386	2.40272e-05	1.67046	0.0534424	1.27071
NM_007631 // Mm.273049 // bladder| blood| bone| bone marrow| brain| connective tissue|	NM_007631 // Ccnd1 // cyclin D1 // 7 F5|7 72.3 cM // 12443 /// ENSMUST00000093962 // Cc	NM_007631	Ccnd1	954.272	980.518	0.973233	1.69821e-14	-4.66449	8.77508e-12	-3.46822	1.49141e-06	-2.08924	4.89041e-08	-2.40107	0.0347884	-1.32878	0.392098	-1.11904	0.087934	-1.25543	0.637292	1.06371	0.197963	1.18556	0.819945	1.03023	2.99897e-18	-7.48271	4.41804e-07	-2.19514	6.58375e-11	-3.17171	0.00851235	-1.43357	0.774871	-1.03814	8.30803e-10	-3.23633	0.000256292	-1.79922	0.0623641	-1.28321	0.471392	-1.09913	0.841894	1.02976
NM_145475 // Mm.222685 // adrenal gland| bladder| blood| bone| bone marrow| brain| embr	NM_145475 // Cerk // ceramide kinase // 15 E2|15 // 223753 /// ENSMUST00000044332 // Ce	NM_145475	Cerk	219.23	61.6359	3.55685	1.90142e-19	-4.65804	3.09158e-16	-3.43089	1.01488e-06	-1.69971	0.012892	1.26973	0.000373958	1.42889	0.0776747	1.18061	4.69706e-08	-1.85643	5.55396e-05	-1.51358	0.0267394	-1.23484	0.0175598	-1.25512	2.84353e-08	1.88355	2.37585e-05	1.55186	0.0441256	1.20996	0.887592	-1.01312	0.0320278	-1.22598	5.51155e-06	1.71844	0.0022883	1.3994	0.976452	-1.00273	0.0223226	-1.24361	0.00513269	-1.35705
NM_008773 // Mm.3000 // blood| bone| bone marrow| connective tissue| embryonic tissue|	NM_008773 // P2ry2 // purinergic receptor P2Y, G-protein coupled 2 // 7|7 F1 // 18442 /	NM_008773	P2ry2	461.832	102.731	4.49554	7.18398e-17	-4.65207	5.7817e-12	-2.88955	0.0105506	-1.34108	1.50695e-06	-1.85692	0.00226289	-1.42904	0.0632988	-1.23221	0.000870317	-1.48282	0.00616833	-1.37207	0.957798	1.00583	0.307179	-1.11966	0.685691	-1.04555	0.104062	1.19938	0.451059	-1.08671	0.84996	1.02102	0.572999	-1.06406	0.0189458	1.35056	0.127478	1.21062	0.0226688	1.29591	0.802898	1.02783	0.600638	-1.06692
NM_134133 // Mm.273197 // blood| bone| bone marrow| brain| connective tissue| embryonic	NM_134133 // 2010002N04Rik // RIKEN cDNA 2010002N04 gene // 18 D3|18 // 106878 /// ENSM	NM_134133	2010002N04Rik	238.93	122.512	1.95026	5.07858e-16	-4.62614	3.41429e-10	-2.62066	0.000693482	-1.53112	0.929727	1.01031	0.533443	1.07534	0.952384	-1.00697	0.00414408	1.42211	0.00241957	1.45503	0.0110756	1.36119	0.0304991	1.29635	0.00772556	1.38367	1.33411e-09	2.48919	4.48879e-05	1.70049	3.67685e-10	2.61328	0.0011045	-1.50279	2.98586e-07	-2.22942	0.00020198	-1.70362	0.00046662	-1.55529	0.0068382	-1.39124	0.0582776	-1.28842
BC025646 // Mm.44355 // bladder| brain| embryonic tissue| eye| mammary gland| pancreas|	BC025646 // Fam81a // family with sequence similarity 81, member A // 9 D|9 // 76886 //	BC025646	Fam81a	56.877	144.959	0.392366	3.51002e-12	-4.62394	0.000107368	-1.94902	0.00815201	1.53994	0.00184903	-1.67756	0.629389	-1.07823	0.647275	1.07401	0.000200545	-1.8879	0.878474	-1.02412	0.464713	1.12113	0.523744	1.10476	5.16084e-05	-2.02218	4.68546e-07	-2.54451	1.25074e-08	-3.03549	2.3481e-11	-4.17602	0.495121	-1.11253	0.5911	-1.09884	0.807479	1.04361	1.18368e-05	-2.17496	3.11562e-05	-2.07362	0.033614	-1.46697
ENSMUST00000025166 // Mm.257437 // bone| bone marrow| brain| connective tissue| dorsal	ENSMUST00000025166 // Cdh2 // cadherin 2 // 18 A1|18 6.0 cM // 12558 /// NM_007664 // C	ENSMUST00000025166	Cdh2	659.988	211.832	3.11561	3.33553e-12	-4.62055	7.09937e-11	-3.92831	0.000210229	-1.8806	0.0705966	-1.33268	0.193216	-1.22697	0.558407	-1.09548	0.000146936	-1.91533	0.00153142	-1.69306	0.0240088	-1.4374	0.0414601	-1.38508	0.004608	1.59116	0.857524	-1.02831	0.0570044	1.35394	0.0947643	-1.30285	0.00445735	-1.59423	0.000791158	-1.88096	0.0694053	-1.38282	0.0938036	-1.3039	0.832511	-1.03344	0.725125	1.06341
ENSMUST00000164172 // Mm.20888 // embryonic tissue| lung| mammary gland| salivary gland	ENSMUST00000164172 // Elf5 // E74-like factor 5 // 2|2 E3 // 13711 /// NM_001145813 //	ENSMUST00000164172	Elf5	556.785	24.2128	22.9954	1.60913e-22	-4.55641	6.15416e-15	-2.46946	0.0606275	-1.15333	1.82056e-06	-1.51278	0.016202	-1.20389	0.861789	-1.01302	7.14305e-08	-1.63033	3.62512e-06	-1.48885	2.46704e-05	-1.42366	6.15586e-05	-1.3931	4.59617e-08	1.64711	0.880755	-1.01121	1.02773e-08	1.70577	0.0357438	1.1742	0.799277	-1.01908	0.552989	1.0509	0.920663	1.00835	0.853638	1.0138	0.147413	1.1153	0.285516	-1.09399
ENSMUST00000030826 // Mm.260220 // brain| embryonic tissue| extraembryonic tissue| eye|	ENSMUST00000030826 // Slc2a5 // solute carrier family 2 (facilitated glucose transporte	ENSMUST00000030826	Slc2a5	187.861	68.7859	2.7311	1.51257e-15	-4.54975	9.11911e-05	-1.67575	0.0874859	1.23049	2.32793e-05	1.76532	0.099699	1.22086	0.0108855	-1.37224	0.810137	1.02904	0.0285427	-1.30878	0.275235	1.13991	0.473068	-1.08952	0.000199604	-1.62545	0.00415653	-1.43378	0.00231595	-1.47071	0.432046	-1.0985	0.367519	1.11392	0.819648	-1.03099	0.814503	-1.0319	0.918923	1.0122	0.141523	1.1943	0.706227	1.05178
NM_007746 // Mm.3275 // adipose tissue| bladder| bone marrow| connective tissue| embryo	NM_007746 // Map3k8 // mitogen-activated protein kinase kinase kinase 8 // 18 A1|18 0.0	NM_007746	Map3k8	218.167	33.2	6.57129	1.30321e-18	-4.53628	2.86637e-15	-3.30459	5.21322e-05	-1.54174	0.00782269	-1.30623	0.459606	-1.07375	0.608261	1.05046	0.835188	1.02015	0.0755127	-1.19	0.172445	-1.14158	0.19721	-1.13313	0.932749	1.00812	0.940758	1.00715	0.103438	-1.17216	0.182797	-1.13793	0.371772	1.08989	0.0665215	1.22393	0.142856	1.1736	0.80867	-1.0235	0.718318	-1.03522	0.79694	1.02812
NM_001081280 // Mm.215994 // blood| bone marrow| brain| eye| heart| nasopharynx| spleen	NM_001081280 // Nlrc3 // NLR family, CARD domain containing 3 // 16 A1|16 // 268857 ///	NM_001081280	Nlrc3	162.175	31.8944	5.08475	6.82729e-15	-4.53546	5.58923e-17	-5.79503	1.55506e-07	-2.20335	0.000891034	-1.56173	0.322613	-1.13215	0.60697	-1.06636	2.72558e-08	-2.35802	4.51459e-07	-2.11417	0.000111244	-1.70315	3.29731e-06	-1.95731	0.160825	-1.19375	0.0217614	-1.34466	0.992503	-1.00117	0.0575165	-1.2744	0.0344167	-1.31202	0.318108	-1.15117	0.282784	-1.16371	0.965607	1.00539	0.30893	-1.13624	0.0365902	-1.35167
NM_009239 // Mm.259312 // bladder| bone marrow| brain| embryonic tissue| extraembryonic	NM_009239 // Sp4 // trans-acting transcription factor 4 // 12 F2|12 60.0 cM // 20688 //	NM_009239	Sp4	443.737	179.369	2.47387	6.75141e-19	-4.49368	6.39165e-13	-2.65005	0.00639813	-1.30682	3.31173e-05	-1.54576	0.0163924	-1.2623	0.253539	-1.11362	1.10118e-05	-1.59691	0.000570879	-1.41676	0.000537188	-1.41949	0.00524434	-1.31605	5.8265e-09	1.99063	8.58507e-07	1.72025	9.86877e-07	1.71331	3.06137e-05	1.54938	0.0811963	1.18084	0.0871643	1.20091	0.991528	1.00112	0.841861	1.01883	0.21172	-1.12513	0.153619	1.16396
NM_010433 // Mm.23790 // adrenal gland| bone marrow| brain| dorsal root ganglion| embry	NM_010433 // Hipk2 // homeodomain interacting protein kinase 2 // 6|6 B // 15258 /// EN	NM_010433	Hipk2	92.6955	269.595	0.343832	3.74367e-19	-4.47966	3.51122e-16	-3.38947	4.85746e-06	-1.6203	3.48444e-09	-1.99423	5.98657e-06	-1.61062	0.0410866	-1.21217	6.41545e-08	-1.83318	1.47238e-06	-1.6765	0.000426349	-1.42012	1.67525e-08	-1.90531	0.0127089	-1.2686	0.0138171	-1.2647	0.170778	1.13552	0.516354	-1.06146	0.19444	-1.12778	0.0265834	-1.26601	0.0677222	-1.21203	0.475721	1.06779	0.381256	-1.084	0.0802496	-1.20177
ENSMUST00000020679 // Mm.225253 // bladder| brain| embryonic tissue| intestine| skin| u	ENSMUST00000020679 // Nipal4 // NIPA-like domain containing 4 // 11 B1.1|11 // 214112 /	ENSMUST00000020679	Nipal4	149.764	50.4674	2.96755	2.45465e-12	-4.46795	2.22885e-05	-2.05439	0.275198	1.17989	5.615e-08	-2.72072	0.000747834	-1.72791	0.114981	-1.2725	0.29486	-1.172	0.263724	1.18471	0.0146515	1.46497	0.0373346	1.38019	0.535303	-1.098	0.923799	-1.01449	0.208352	-1.21073	0.0141961	-1.46778	0.00181272	-1.64945	0.0177202	-1.51573	0.130523	-1.29617	0.150366	-1.2452	0.0310397	-1.39717	0.227096	-1.22889
NR_045535 // Mm.9593 // bladder| blood| bone marrow| brain| dorsal root ganglion| embry	NR_045535 // Sh2d3c // SH2 domain containing 3C // 2 B|2 // 27387 /// NM_013781 // Sh2d	NR_045535	Sh2d3c	291.909	65.0628	4.48658	3.9965e-17	-4.465	2.59444e-10	-2.41041	0.0593553	-1.22487	0.652109	1.04859	0.172597	1.15616	0.0282905	1.26858	1.23396e-06	-1.81895	1.27144e-05	-1.68485	0.00254388	-1.40059	0.00354665	-1.38287	0.00174521	1.42059	7.50828e-05	1.58763	0.00118393	-1.44112	0.0642732	-1.22002	0.100302	-1.1922	0.00168197	1.48589	0.0418137	1.28014	0.323299	-1.11013	0.0652213	-1.21913	0.733706	1.04103
ENSMUST00000118587 // Mm.15675 // bladder| bone marrow| brain| connective tissue| embry	ENSMUST00000118587 // Efna1 // ephrin A1 // 3 F1|3 48.5 cM // 13636 /// NM_010107 // Ef	ENSMUST00000118587	Efna1	242.638	120.346	2.01618	1.9456e-12	-4.44363	8.28197e-05	-1.91381	0.175636	1.226	9.41953e-07	2.36001	9.68693e-06	2.11824	0.211555	1.20638	0.184826	1.22067	0.0683171	1.31909	0.352293	1.14919	0.304827	1.16602	0.000624475	1.73263	0.478844	1.1114	0.151458	1.24125	0.14403	-1.24636	0.0512117	-1.346	0.0220225	1.48571	0.110954	1.31087	0.713522	-1.05615	0.250914	-1.18786	0.0169302	-1.51306
NM_001001488 // Mm.270043 // bladder| embryonic tissue| extraembryonic tissue| intestin	NM_001001488 // Atp8b1 // ATPase, class I, type 8B, member 1 // 18 E1|18 // 54670 /// E	NM_001001488	Atp8b1	52.6779	38.0757	1.3835	3.89248e-21	-4.3909	1.17682e-11	-2.10847	0.00175916	-1.30296	0.00227673	-1.29348	0.0326485	-1.1907	0.537218	-1.05027	3.18216e-06	1.53415	1.99323e-07	1.64259	3.62949e-06	1.52916	6.40752e-09	1.7892	0.898459	1.01017	0.83588	-1.01657	0.0188017	1.21309	0.493948	-1.05591	0.102765	1.1407	0.00439762	-1.30696	0.831058	-1.0192	0.697958	1.03128	0.462482	1.06021	0.00808868	1.28031
NM_198294 // Mm.27917 // bladder| bone| bone marrow| brain| connective tissue| embryoni	NM_198294 // Tanc1 // tetratricopeptide repeat, ankyrin repeat and coiled-coil containi	NM_198294	Tanc1	347.035	394.992	0.878587	4.44005e-16	-4.36161	5.25891e-11	-2.69534	0.000309876	-1.54992	0.000320814	1.54793	3.52703e-05	1.67691	0.180467	1.16295	0.00374708	-1.40684	0.191313	-1.15859	0.0374271	-1.26936	0.40619	-1.09741	0.346562	1.11123	0.763388	1.03413	0.0946754	-1.20878	0.0293986	-1.28443	0.417054	-1.09505	0.24236	1.15911	0.930685	-1.01095	0.903018	1.01367	0.23421	-1.14311	0.575693	1.07273
NM_028783 // Mm.485070 // bone marrow| brain| embryonic tissue| extraembryonic tissue|	NM_028783 // Robo4 // roundabout homolog 4 (Drosophila) // 9 A4|9 // 74144 /// ENSMUST0	NM_028783	Robo4	81.815	59.1112	1.38409	6.13621e-12	-4.34369	7.09203e-13	-4.87722	2.44373e-09	-3.20792	0.00211048	-1.64711	0.621944	1.07822	0.0134315	1.48055	1.06523e-10	-3.74815	3.58516e-07	-2.52575	0.000556498	-1.76787	0.00395224	-1.59077	1.13953e-09	-3.33014	3.62223e-10	-3.52463	0.502573	-1.10798	0.00137067	-1.68599	0.000147107	1.89141	0.0757352	-1.36428	0.325296	-1.18483	0.0133116	1.48136	0.266147	1.18642	0.165806	1.2718
NM_008492 // Mm.9745 // bladder| blood| bone| bone marrow| brain| connective tissue| em	NM_008492 // Ldhb // lactate dehydrogenase B // 6 G2|6 62.0 cM // 16832 /// ENSMUST0000	NM_008492	Ldhb	664.708	1241.27	0.535507	2.71133e-15	-4.34156	9.18971e-08	-2.14707	0.520413	-1.0787	0.615607	-1.06091	0.0394669	1.28261	0.359305	1.11445	4.14993e-20	-7.76757	1.41683e-18	-6.35671	2.35872e-19	-7.02407	6.16262e-20	-7.58913	6.99196e-08	2.1687	0.000142517	1.63648	0.151829	1.18619	0.657192	-1.05363	0.468755	-1.08922	4.74403e-06	2.00664	0.000356344	1.67096	0.563706	1.07039	0.631644	-1.05807	0.404887	-1.11686
NM_019861 // Mm.29561 // bladder| bone| brain| connective tissue| embryonic tissue| ext	NM_019861 // Ctsf // cathepsin F // 19 A|19 // 56464 /// ENSMUST00000119694 // Ctsf //	NM_019861	Ctsf	396.473	149.075	2.65956	3.09489e-17	-4.33948	3.67813e-10	-2.3272	0.187286	-1.14619	0.0515954	1.22646	0.254301	1.12481	0.429798	1.08448	0.553342	-1.06267	0.0128558	-1.30352	0.845102	-1.02019	0.874034	1.01635	0.00855938	-1.3251	0.393166	-1.09174	0.0047698	-1.35566	0.720734	-1.03728	0.70545	1.03946	0.00126937	-1.48714	0.841797	-1.02322	0.0435148	-1.23628	0.0257055	1.26588	0.0373144	1.27922
ENSMUST00000121114 // Mm.22716 // bone| brain| embryonic tissue| eye| inner ear| intest	ENSMUST00000121114 // Slc43a1 // solute carrier family 43, member 1 // 2|2 E1 // 72401	ENSMUST00000121114	Slc43a1	79.2707	215.098	0.368533	1.89217e-16	-4.28924	3.02369e-11	-2.65031	1.00797e-05	-1.71644	0.0306533	-1.27007	0.766367	1.03241	0.252448	1.1318	2.39935e-07	-1.9448	4.92694e-06	-1.75824	1.50487e-07	-1.97531	3.16935e-10	-2.43725	8.11677e-07	-1.86739	0.0988716	-1.19746	1.55936e-07	-1.97297	0.00374111	-1.3892	0.694119	1.04313	0.407963	-1.10537	0.0050289	1.42775	0.00545159	-1.36843	0.647674	1.05031	0.337649	-1.12329
NM_028718 // Mm.490501 // bone marrow| brain| embryonic tissue| eye| heart| kidney| mam	NM_028718 // Traf3ip1 // TRAF3 interacting protein 1 // 1 D|1 // 74019 /// ENSMUST00000	NM_028718	Traf3ip1	125.767	140.059	0.897957	3.09156e-16	-4.25818	7.76811e-17	-4.53475	1.31974e-07	-1.99794	0.0130011	-1.3235	0.750982	1.03501	0.872422	1.01756	7.43702e-05	-1.6111	0.000716505	-1.48523	0.0023101	-1.42064	0.00055304	-1.4995	0.0793319	-1.21409	0.00164465	-1.43942	0.802068	-1.02755	0.0116682	-1.32971	0.717243	-1.04006	0.338367	-1.12442	0.475324	-1.09112	0.537016	1.06936	0.929515	1.00963	0.858183	-1.022
ENSMUST00000102642 // Mm.38261 // bone marrow| brain| connective tissue| embryonic tiss	ENSMUST00000102642 // Ube2l6 // ubiquitin-conjugating enzyme E2L 6 // 2|2 E1 // 56791 /	ENSMUST00000102642	Ube2l6	69.105	40.2529	1.71677	5.67374e-08	-4.24457	2.92284e-06	-3.25116	0.0420895	-1.57454	5.75135e-05	2.65035	0.0545253	1.53444	0.884303	1.03214	8.40894e-14	11.3373	1.43411e-11	7.61623	6.58015e-07	3.59596	1.07192e-07	4.06525	0.618569	-1.1145	0.00468574	-1.91172	0.0837701	1.46713	0.248255	-1.28811	0.910718	-1.02468	0.245542	-1.33128	0.244275	-1.33232	0.698535	-1.08793	0.40473	-1.19955	0.203022	-1.3692
NM_145457 // Mm.490243 // bone marrow| brain| embryonic tissue| eye| fertilized ovum| i	NM_145457 // Paip1 // polyadenylate binding protein-interacting protein 1 // 13 D2.3|13	NM_145457	Paip1	2685.13	934.81	2.87238	2.48926e-27	-4.22104	3.9286e-22	-2.82138	0.000471394	-1.21849	0.000156823	-1.24194	0.0370575	-1.11827	0.149821	1.07903	8.63058e-07	-1.35307	1.97437e-05	-1.2858	0.146358	-1.07975	0.000760431	-1.20821	2.39913e-15	1.92185	3.46302e-11	1.60169	0.0941131	1.0929	0.00724731	1.15803	0.00274336	-1.18009	1.04402e-06	1.39974	2.35669e-05	1.32203	0.000497449	-1.21734	0.793022	-1.01377	0.0265669	-1.1435
NM_008542 // Mm.325757 // blood| embryonic tissue| eye| intestine| kidney| liver| lung|	NM_008542 // Smad6 // SMAD family member 6 // 9|9 D // 17130 /// ENSMUST00000041029 //	NM_008542	Smad6	440.458	162.928	2.70339	6.32018e-14	-4.21771	1.80674e-07	-2.23163	0.248406	-1.16022	0.0219602	-1.35346	0.787452	-1.03503	0.568406	1.07569	0.0970949	-1.24061	0.57436	-1.07448	0.454329	-1.1006	0.915229	-1.01368	2.28513e-06	2.01791	0.014294	1.38438	5.99818e-13	3.79623	1.63625e-07	2.24044	0.91141	1.0143	7.72145e-09	-2.83976	0.000308813	-1.75818	0.000127526	-1.715	0.104985	-1.23429	0.430833	-1.12012
NM_001081085 // Mm.250293 // bone marrow| brain| embryonic tissue| extraembryonic tissu	NM_001081085 // 2010317E24Rik // RIKEN cDNA 2010317E24 gene // 2 A3|2 // 72080 /// ENSM	NM_001081085	2010317E24Rik	129.968	134.41	0.966953	1.45142e-17	-4.20655	2.93186e-12	-2.63222	0.000176618	-1.49658	0.00041534	-1.45553	0.159526	-1.14965	0.820481	1.02247	5.27589e-05	-1.55512	0.589508	-1.05433	0.00321699	-1.35711	0.000316237	-1.4686	0.0072904	1.31701	0.00210924	1.37755	0.342942	1.09786	0.049772	1.21764	0.39125	-1.08797	0.0310806	1.27689	0.00457776	1.38927	0.214758	-1.13048	0.835663	1.02052	0.0181953	-1.30916
NM_010852 // Mm.18535 // adrenal gland| bone marrow| brain| dorsal root ganglion| embry	NM_010852 // Myef2 // myelin basic protein expression factor 2, repressor // 2 F1|2 73.	NM_010852	Myef2	587.356	808.078	0.726855	9.45858e-10	-4.17409	0.0348398	-1.47777	0.244468	-1.23499	0.000483867	-1.97417	0.151381	-1.2987	0.193265	-1.26674	0.00709092	-1.66137	0.181524	-1.27503	0.0528143	-1.42863	0.365029	-1.17786	0.209748	1.25581	0.21682	1.25134	0.223225	1.2474	0.942938	-1.01295	0.583404	-1.10382	0.592893	1.11425	0.0586788	1.47826	0.486516	1.13369	0.325659	1.19458	0.711493	-1.07763
NR_038157 // Mm.17618 // embryonic tissue| stomach| cleavage| adult	NR_038157 // 2210019I11Rik // RIKEN cDNA 2210019I11 gene // 5|5 // 70147	NR_038157	2210019I11Rik	43.9491	19.0329	2.30912	2.07249e-12	-4.15955	2.90118e-11	-3.65397	8.20704e-07	-2.28999	4.19101e-05	-1.9211	0.00258774	-1.57701	0.138546	-1.23857	0.879418	-1.02184	0.750045	-1.04644	0.217959	1.19383	0.0887316	1.28017	0.732392	1.04993	0.854057	1.02654	0.768144	-1.0429	0.864106	1.02468	0.986393	1.00243	0.514947	-1.11012	0.250162	-1.20391	0.917787	-1.01481	0.961358	-1.00692	0.25687	1.20073
NR_027651 // Mm.289645 // adrenal gland| bladder| bone marrow| brain| connective tissue	NR_027651 // Meg3 // maternally expressed 3 // 12 F1|12 54.0 cM // 17263 /// NR_003633	NR_027651	Meg3	338.39	414.248	0.816879	2.96893e-10	-4.15373	1.10971e-07	-3.00878	0.00553755	-1.64721	0.496824	1.12362	0.00120627	-1.81028	0.046922	1.41724	0.131072	1.29964	0.0880515	-1.34624	0.00951945	1.58958	0.30002	-1.19541	3.91712e-05	-2.19869	4.62663e-07	-2.78873	0.482399	1.12809	0.000893018	-1.84289	0.548789	1.10825	0.931291	1.01671	0.201833	1.28131	0.000733478	1.86435	0.0405096	1.43346	0.303104	-1.2205
NM_001247984 // Mm.153911 // bladder| blood| bone| bone marrow| brain| dorsal root gang	NM_001247984 // Lcp1 // lymphocyte cytosolic protein 1 // 14 D3|14 42.0 cM // 18826 ///	NM_001247984	Lcp1	673.567	42.3297	15.9124	1.88652e-14	-4.14029	5.96798e-05	-1.71856	0.100251	-1.22453	0.00586141	1.42014	0.0204834	1.33731	0.26934	1.14433	0.957697	1.00644	0.602009	1.0653	0.0514645	1.27347	0.000459864	1.58447	0.416888	1.10376	0.560064	-1.07328	0.0813349	1.24021	0.892339	-1.01653	0.0204169	-1.33753	0.0443839	1.32426	0.00654958	1.47458	0.542543	1.07672	0.327904	1.1266	5.21425e-05	-1.8484
NM_153099 // Mm.292285 // testis| adult /// ENSMUST00000035715 // Mm.292285 // testis|	NM_153099 // Prss42 // protease, serine, 42 // 9 F3|9 // 235628 /// ENSMUST00000035715	NM_153099	Prss42	109.437	258.636	0.423132	1.17168e-11	-4.13726	1.94257e-06	-2.31122	0.000417128	-1.78358	0.63953	1.07335	0.0280558	1.40797	1.47257e-05	2.10038	9.81692e-11	-3.71283	5.38207e-07	-2.45464	0.000149166	-1.87778	3.73747e-06	-2.24118	0.96642	-1.00637	0.047422	-1.35934	0.222424	1.20435	0.81995	-1.03496	0.0171713	1.45254	0.0518761	1.40206	0.549871	1.10698	0.164576	1.23667	0.708586	1.05809	0.743645	1.05707
NM_009530 // Mm.10141 // adipose tissue| blood| bone| bone marrow| brain| connective ti	NM_009530 // Atrx // alpha thalassemia/mental retardation syndrome X-linked homolog (hu	NM_009530	Atrx	1716.02	990.23	1.73295	1.40416e-26	-4.12024	2.11704e-18	-2.30367	8.34397e-05	-1.26394	0.000144712	-1.25185	0.354075	-1.05129	0.37127	1.04943	0.00533023	-1.17048	0.0930746	-1.09617	0.0174494	-1.14158	0.0936315	-1.09599	0.0559958	1.11077	0.295255	-1.05822	0.000724029	1.21622	0.982836	-1.00116	0.909874	1.0061	5.75567e-05	-1.3105	0.138703	-1.09481	0.0018924	-1.19452	0.53751	-1.03374	0.893776	1.00809
NM_001081114 // Mm.159258 // brain| embryonic tissue| eye| inner ear| intestine| kidney	NM_001081114 // Clip3 // CAP-GLY domain containing linker protein 3 // 7 B1|7 // 76686	NM_001081114	Clip3	341.236	277.303	1.23055	5.03699e-18	-4.10755	1.46848e-13	-2.77959	0.00634762	-1.30642	0.117379	-1.15994	0.264674	1.11055	0.368918	1.08787	7.42186e-05	-1.50748	0.0244754	-1.24214	0.0849104	-1.17797	0.0576714	-1.19867	1.96423e-06	-1.67747	0.633283	-1.04556	0.000150357	-1.47558	0.281937	-1.10638	0.0454489	-1.21105	2.3838e-05	-1.64744	0.0100083	-1.32561	0.0465055	-1.20986	0.096239	-1.17108	0.916373	-1.01106
NM_007528 // Mm.12930 // brain| embryonic tissue| eye| heart| inner ear| kidney| mammar	NM_007528 // Bcl6b // B cell CLL/lymphoma 6, member B // 11|11 B4 // 12029 /// ENSMUST0	NM_007528	Bcl6b	241.568	154.207	1.56652	1.18792e-19	-4.10572	1.43304e-11	-2.18115	0.000116541	-1.42663	8.20194e-06	1.53101	1.39641e-05	1.50977	2.20469e-05	1.49169	1.66977e-10	-2.03609	1.36928e-11	-2.18398	2.89626e-09	-1.88457	2.71225e-14	-2.63306	5.87785e-17	-3.23743	1.26508e-08	-1.81233	0.00252778	-1.30711	3.7852e-05	-1.47044	0.833155	-1.01775	1.21242e-06	-1.70664	0.0145734	-1.26913	5.46384e-08	1.74412	0.0700497	1.16712	0.082345	1.18084
NM_001111021 // Mm.4081 // bladder| blood| bone| bone marrow| brain| connective tissue|	NM_001111021 // Runx1 // runt related transcription factor 1 // 16 C4|16 62.2 cM // 123	NM_001111021	Runx1	193.699	44.8644	4.31742	6.97761e-17	-4.09974	3.35709e-12	-2.69678	0.132925	-1.16617	0.0584165	-1.21567	0.101105	-1.18317	0.708449	-1.03845	0.300226	-1.11089	0.410676	-1.08687	0.0876035	-1.19185	0.0430825	-1.233	0.211299	1.13575	0.0421846	-1.23419	0.283763	-1.11501	1.68548e-05	-1.63457	0.438844	-1.08149	0.889315	-1.01589	0.346095	-1.11331	0.0329238	-1.24797	0.000957886	-1.43032	0.672498	-1.0491
NM_138683 // Mm.42202 // bladder| brain| embryonic tissue| epididymis| extraembryonic t	NM_138683 // Rspo1 // R-spondin homolog (Xenopus laevis) // 4 D2.2|4 // 192199 /// ENSM	NM_138683	Rspo1	80.6271	100.752	0.80025	9.7074e-15	-4.08242	2.16236e-09	-2.46319	9.67903e-06	-1.80836	0.234572	-1.15114	0.113	1.20807	0.0217296	1.32146	0.050534	-1.26521	0.0140703	-1.3495	0.00295211	-1.44736	1.59649e-08	-2.28633	0.932585	-1.00998	0.0848049	1.22896	0.006534	1.39798	0.39622	1.10518	0.192659	-1.16713	0.00100645	-1.59328	0.405094	1.11656	0.716396	1.04358	0.15853	1.18246	0.945866	1.00899
ENSMUST00000059667 // Mm.270641 // brain| embryonic tissue| eye| spinal cord| sympathet	ENSMUST00000059667 // Hpcal4 // hippocalcin-like 4 // 4 D2.2|4 // 170638 /// NM_174998	ENSMUST00000059667	Hpcal4	102.138	39.3674	2.59448	1.84622e-13	-4.05636	4.29856e-07	-2.17016	0.000579164	-1.61475	0.724639	-1.04642	0.0875647	1.25122	0.0382058	1.31571	0.286235	-1.1483	0.390363	-1.1175	0.0975666	1.24247	0.106626	1.23521	0.845812	1.02535	0.00966742	1.41627	0.0188333	1.36815	0.094104	1.2454	0.259985	-1.15741	0.00723866	-1.50274	0.510514	-1.10014	0.438295	1.10534	0.969073	-1.005	0.615135	1.07555
NM_015767 // Mm.24375 // brain| connective tissue| embryonic tissue| eye| kidney| liver	NM_015767 // Ttpa // tocopherol (alpha) transfer protein // 4 A3|4 22.7 cM // 50500 ///	NM_015767	Ttpa	35.695	282.503	0.126353	6.52762e-08	-4.05327	2.86631e-06	-3.15901	0.00673368	-1.82662	0.786513	1.05908	0.514849	1.14839	0.6402	1.10424	0.196189	-1.3189	0.0228061	-1.64701	0.00296444	-1.94889	0.00100322	-2.1143	9.01525e-05	-2.50714	0.252487	-1.27697	0.0177802	-1.68363	0.960701	1.01049	0.418479	1.18783	0.0668308	-1.56196	0.890552	1.0333	0.266063	1.26809	0.00965136	1.77349	0.0604096	1.57994
NM_019568 // Mm.30211 // bone marrow| brain| connective tissue| embryonic tissue| extra	NM_019568 // Cxcl14 // chemokine (C-X-C motif) ligand 14 // 13 B1|13 // 57266 /// ENSMU	NM_019568	Cxcl14	205.158	46.7068	4.39247	4.90941e-11	-4.05123	1.85531e-06	-2.393	0.0957549	-1.30466	0.0190784	1.46373	0.022348	1.44864	0.216924	1.21595	0.00188792	-1.68088	0.000702914	-1.77419	0.000369505	-1.83579	2.27748e-05	-2.11557	0.00198638	1.67611	0.396561	1.14287	0.00779242	1.5482	0.182805	1.23528	0.757273	-1.04968	0.671292	-1.07772	0.730707	1.06256	0.0604857	-1.35145	0.956671	-1.00856	0.271036	-1.21584
NM_001164034 // Mm.267570 // adrenal gland| bladder| bone marrow| brain| embryonic tiss	NM_001164034 // Ntf3 // neurotrophin 3 // 6 F3|6 61.0 cM // 18205 /// NM_001164035 // N	NM_001164034	Ntf3	135.644	28.2657	4.79889	1.29366e-13	-4.04344	3.05548e-13	-3.88507	1.5447e-09	-2.68754	1.55179e-14	-4.47443	2.95057e-08	-2.38653	0.56119	-1.0767	3.4457e-05	-1.80354	0.0100552	-1.40656	0.00616529	1.44071	0.0168381	1.3701	0.259755	-1.1551	0.771493	-1.03756	0.401234	-1.11294	0.559012	1.07714	0.937249	-1.01004	0.366166	-1.13829	0.990962	-1.00162	0.636917	-1.06182	0.267176	1.1525	0.875334	1.02262
NM_019461 // Mm.483107 // adrenal gland| brain| embryonic tissue| extraembryonic tissue	NM_019461 // Usp27x // ubiquitin specific peptidase 27, X chromosome // X A1.1|X 1.1 cM	NM_019461	Usp27x	246.645	116.152	2.12347	2.40145e-15	-4.04018	5.94557e-12	-2.92671	0.0346633	-1.27407	4.3054e-06	-1.80503	6.3828e-05	-1.64152	0.0655923	-1.23324	0.0574134	-1.24194	0.0607072	-1.23831	0.274464	-1.1305	0.923452	1.01076	3.89538e-06	1.81132	0.0307892	1.28145	0.000118329	1.6054	0.996492	-1.00049	0.00236892	-1.43309	0.0197616	1.3529	0.842781	1.02514	0.993297	-1.00094	0.000723503	-1.50104	9.15046e-05	-1.72002
NM_013864 // Mm.26722 // bladder| blood| bone| bone marrow| brain| dorsal root ganglion	NM_013864 // Ndrg2 // N-myc downstream regulated gene 2 // 14 C2|14 // 29811 /// ENSMUS	NM_013864	Ndrg2	584.849	703.95	0.83081	2.68598e-17	-4.01677	1.65883e-14	-3.11765	3.79971e-08	-1.92299	0.000158161	1.49338	0.00438323	1.33653	0.000274518	1.46738	1.43165e-06	-1.72434	7.57275e-07	-1.75759	0.00939045	-1.29958	2.85299e-07	-1.80979	5.68018e-07	1.77281	2.17162e-07	1.82467	0.315954	-1.10231	0.626333	-1.04819	0.873295	1.01551	2.05549e-05	1.68498	0.00317549	1.40329	0.27935	-1.11093	0.0083156	-1.30553	0.590733	1.06016
ENSMUST00000097423 // Mm.359991 // bone marrow| brain| connective tissue| embryonic tis	ENSMUST00000097423 // Rsph3a // radial spoke 3A homolog (Chlamydomonas) // 17 A1|17 //	ENSMUST00000097423	Rsph3a	128.062	29.8829	4.28545	3.78157e-13	-4.0057	8.9057e-11	-3.12741	0.000293287	-1.67611	0.266111	1.1578	0.0164001	1.38505	0.492889	1.09406	2.35608e-06	-2.04958	2.64509e-05	-1.85601	3.31144e-06	-2.02136	0.00148584	-1.55891	0.312926	1.14198	0.0410719	1.31571	0.616402	-1.06778	0.0936922	1.24998	0.895344	-1.01734	0.459129	1.11527	0.452499	1.11709	0.725338	-1.04703	0.433503	1.10824	0.859004	1.02644
NM_130450 // Mm.314113 // adipose tissue| bladder| bone marrow| brain| dorsal root gang	NM_130450 // Elovl6 // ELOVL family member 6, elongation of long chain fatty acids (yea	NM_130450	Elovl6	1675.37	2292.33	0.730859	4.52294e-27	-4.00563	7.70765e-15	-1.85206	0.00262608	-1.17699	0.358019	-1.04829	0.110736	1.08626	0.000702547	1.20514	0.188344	-1.07024	0.727541	-1.01795	0.794317	1.0134	0.0260966	-1.12441	0.190707	1.06984	0.521629	-1.03333	0.000744621	1.20392	0.128144	1.082	0.0120073	1.14293	0.219502	-1.07368	0.930878	1.00499	0.529244	-1.03271	0.465035	1.03812	0.34522	1.05594
NM_008211 // Mm.371563 // adipose tissue| bladder| blood| bone| bone marrow| brain| con	NM_008211 // H3f3b // H3 histone, family 3B // 11 E2|11 // 15081 /// BC021768 // H3f3b	NM_008211	H3f3b	132.794	112.52	1.18018	5.49358e-08	-4.00404	0.000482278	-2.19982	0.0165246	-1.67949	0.0391615	-1.55539	0.000313138	-2.26726	0.025353	-1.6181	0.382007	1.20081	0.34793	-1.2173	0.84437	-1.04175	0.674135	1.09164	0.0957751	1.42374	0.522927	-1.14273	0.0204288	1.64909	0.228517	-1.28815	0.634892	-1.10413	0.81827	1.05527	0.876887	1.03693	0.469566	1.16317	0.523922	-1.14236	0.526457	-1.16025
NM_133914 // Mm.290655 // bone| bone marrow| brain| embryonic tissue| epididymis| eye|	NM_133914 // Rasa4 // RAS p21 protein activator 4 // 5 G2|5 // 54153 /// ENSMUST0000004	NM_133914	Rasa4	47.2226	55.0832	0.857297	1.05431e-14	-4.00038	1.86996e-10	-2.67255	0.0376169	-1.28142	0.00669745	-1.39094	0.167919	-1.17571	0.0351293	-1.28593	1.22671e-05	-1.78032	0.199262	-1.16235	0.371124	1.10987	0.0905295	1.22135	1.042e-06	-1.94656	0.000494442	-1.5494	0.00493289	-1.40973	0.000630746	-1.53463	0.910065	-1.01318	3.87619e-05	1.82321	1.91941e-07	2.26342	7.73259e-06	1.8105	0.000106482	1.64346	0.0116297	-1.40883
NM_207204 // Mm.120911 // blood| bone| brain| embryonic tissue| eye| kidney| lymph node	NM_207204 // Ninl // ninein-like // 2 G3|2 // 78177 /// ENSMUST00000109896 // Ninl // n	NM_207204	Ninl	289.494	229.672	1.26047	1.50997e-20	-4.00033	4.46623e-15	-2.58397	1.06896e-05	-1.47336	6.53292e-07	-1.57596	0.0625452	-1.15851	0.434277	1.0625	1.08025e-09	-1.84156	2.11387e-05	-1.44908	5.75912e-06	-1.49559	1.03108e-05	-1.47465	0.00385167	-1.26598	2.42257e-05	-1.44426	0.00352891	1.26914	0.260658	-1.09154	0.657871	1.03484	0.00018568	-1.42768	0.107974	-1.15241	0.499465	1.0537	0.351731	1.07501	0.716188	-1.03208
NM_013813 // Mm.131135 // brain| dorsal root ganglion| embryonic tissue| extraembryonic	NM_013813 // Epb4.1l3 // erythrocyte protein band 4.1-like 3 // 17 E1.3|17 42.5 cM // 1	NM_013813	Epb4.1l3	114.471	132.43	0.864388	2.89085e-12	-3.98933	8.83791e-08	-2.48604	0.000112838	-1.81593	0.00201509	-1.58403	0.472838	-1.10598	0.709136	1.0536	0.687618	-1.05791	0.0875034	1.27579	0.940753	-1.01045	0.449958	1.11188	6.39266e-10	3.09401	1.16404e-08	2.71724	0.000453433	1.70274	0.050113	1.32436	0.000174572	-1.78006	0.469306	-1.12086	0.59314	-1.08775	0.000200939	-1.76857	2.65108e-05	-1.93798	0.0081312	-1.54572
NM_010020 // Mm.41993 // brain| embryonic tissue| pituitary gland| skin| thymus| gastru	NM_010020 // Slc6a3 // solute carrier family 6 (neurotransmitter transporter, dopamine)	NM_010020	Slc6a3	68.2831	36.653	1.86296	2.29734e-12	-3.98484	1.46411e-08	-2.66632	2.26568e-05	-1.93997	0.453983	-1.10979	0.27946	1.16306	0.320738	1.14857	0.576969	-1.08056	0.00175396	1.58841	0.00476613	1.51029	0.108499	1.25387	0.237908	-1.17949	0.336699	-1.14335	0.35416	-1.13786	0.898872	1.01777	0.0313377	1.36013	0.674754	-1.06762	0.877618	-1.02428	0.125369	-1.24074	0.672718	-1.06037	0.437613	1.12904
NM_178679 // Mm.268346 // bone| bone marrow| brain| embryonic tissue| eye| kidney| lung	NM_178679 // Zfp365 // zinc finger protein 365 // 10 B5.1|10 // 216049 /// ENSMUST00000	NM_178679	Zfp365	75.0387	108.941	0.688803	1.95126e-13	-3.95975	9.80051e-09	-2.49113	0.825207	1.02839	0.00212116	-1.51361	0.833868	1.02695	0.933154	1.01069	0.0792688	-1.25474	0.60257	1.06834	0.571132	-1.07458	0.871916	1.02065	5.86847e-06	-1.93436	0.00105292	-1.56172	0.00936513	-1.41094	0.954932	-1.00719	0.00443874	-1.46279	0.00127686	-1.63447	2.60947e-06	-2.17571	0.0477517	1.29354	0.457701	1.09906	0.710836	1.05426
ENSMUST00000029673 // Mm.331159 // brain| embryonic tissue| eye| mammary gland| nasopha	ENSMUST00000029673 // Efna3 // ephrin A3 // 3 F1|3 48.0 cM // 13638 /// NM_010108 // Ef	ENSMUST00000029673	Efna3	1210.49	397.417	3.04588	9.01273e-19	-3.9562	4.92823e-06	-1.57425	0.395522	1.07641	0.932546	-1.00733	0.391717	1.07706	0.700982	1.03371	0.00557632	-1.28595	0.217387	-1.11345	0.746032	-1.02835	0.00509479	-1.28973	1.39128e-05	1.53065	0.46845	-1.06476	0.424966	1.07155	0.0291877	-1.21419	0.00639962	-1.28017	0.000115381	1.51098	0.0752237	1.19248	0.0805301	1.16624	0.104844	1.15294	0.128944	-1.16112
NM_028386 // Mm.151745 // brain| embryonic tissue| epididymis| eye| lung| nasopharynx|	NM_028386 // Asphd2 // aspartate beta-hydroxylase domain containing 2 // 5 F|5 // 72898	NM_028386	Asphd2	110.305	84.7194	1.302	7.7586e-13	-3.94411	3.02053e-10	-3.01083	0.10354	-1.24533	5.38842e-10	-2.93638	0.00308248	-1.5149	0.24626	-1.16759	0.00050916	-1.64698	0.0513929	-1.30284	0.661301	-1.05983	0.244052	-1.16845	0.194642	1.18969	0.790341	1.03586	0.00948398	1.43214	0.193541	1.19022	0.0158801	-1.3936	0.234535	-1.19551	0.525905	-1.09928	0.231404	-1.17353	0.357063	-1.13051	0.0016912	-1.64676
NM_009856 // Mm.57175 // bone| bone marrow| brain| embryonic tissue| eye| heart| inner	NM_009856 // Cd83 // CD83 antigen // 13 A4-5|13 24.0 cM // 12522 /// ENSMUST00000015540	NM_009856	Cd83	216.552	41.5734	5.2089	2.02789e-10	-3.91457	1.53285e-05	-2.20766	0.67501	1.07013	0.000280835	1.89728	0.00967611	1.54736	0.190015	1.23862	0.00183649	-1.70988	0.000153488	-1.95935	5.55315e-06	-2.3243	3.81736e-05	-2.10685	0.562522	1.09825	0.697761	-1.06478	0.335295	1.16944	0.941317	1.01196	0.880535	1.02457	0.0664325	-1.40554	0.0460133	-1.44998	0.487431	-1.11905	0.416516	-1.14083	0.29988	1.20854
NM_016762 // Mm.396856 // adipose tissue| adrenal gland| bladder| blood| bone| bone mar	NM_016762 // Matn2 // matrilin 2 // 15|15 B3.3 // 17181 /// ENSMUST00000022947 // Matn2	NM_016762	Matn2	182.874	43.9585	4.16016	1.87525e-18	-3.86126	6.70377e-17	-3.36488	9.05616e-11	-2.12742	7.41127e-05	1.46399	1.36072e-06	1.63269	0.273968	1.10017	0.465139	1.06552	0.0137939	1.24843	0.0323364	-1.21041	0.00181951	-1.33367	0.0110499	1.25805	1.39179e-05	1.53311	0.0818726	1.1661	0.333338	1.08793	0.569877	-1.05054	0.0369736	1.23222	4.83263e-05	1.55529	0.476809	1.06376	0.750672	1.02791	0.22035	-1.12796
NM_009154 // Mm.260374 // bladder| bone marrow| brain| dorsal root ganglion| embryonic	NM_009154 // Sema5a // sema domain, seven thrombospondin repeats (type 1 and type 1-lik	NM_009154	Sema5a	157.611	43.1758	3.65046	2.21688e-11	-3.85396	5.4197e-06	-2.15499	0.442678	-1.11976	3.04374e-06	2.21273	8.05181e-07	2.35123	0.012515	1.46503	6.16329e-08	-2.64406	4.78924e-06	-2.16726	2.46392e-07	-2.48169	2.01466e-08	-2.78363	0.468558	1.11266	0.0241281	1.40806	0.00323352	-1.58038	0.0720741	-1.30949	0.71059	-1.05603	0.0232374	1.47277	0.00854619	1.5744	0.379132	-1.13854	0.453444	-1.11677	0.966251	-1.007
NM_025566 // Mm.2312 // bone marrow| brain| embryonic tissue| extraembryonic tissue| ey	NM_025566 // Tnfaip8l1 // tumor necrosis factor, alpha-induced protein 8-like 1 // 17|1	NM_025566	Tnfaip8l1	96.0903	35.7807	2.68553	1.1462e-13	-3.84636	9.38182e-11	-2.88923	0.000185976	-1.64859	0.166351	-1.18622	0.286137	-1.1399	0.992769	-1.0011	0.505094	-1.08486	0.347906	1.12192	0.00433282	1.44313	0.0100097	1.38796	0.489494	1.08815	0.0602263	1.26406	0.0630189	-1.26076	0.493114	1.08738	0.45353	1.09601	0.855403	-1.02527	0.44719	-1.11012	0.147297	-1.19605	0.447564	-1.09735	0.0696444	1.28892
ENSMUST00000089257 // Mm.379070 // brain| dorsal root ganglion| embryonic tissue| eye|	ENSMUST00000089257 // Insm1 // insulinoma-associated 1 // 2 G1|2 // 53626 /// NM_016889	ENSMUST00000089257	Insm1	92.3898	56.6919	1.62968	2.21386e-11	-3.84488	2.56612e-09	-3.05766	0.00090767	-1.68692	0.689317	1.06039	0.697755	1.05861	0.0865317	1.29173	0.00044389	-1.7483	2.95088e-05	-1.99009	0.040369	-1.36168	0.000952854	-1.68278	0.695616	-1.05906	0.98665	1.00245	0.00140219	1.64989	0.13209	1.25098	0.0108405	1.47633	0.00138325	-1.75661	0.0794383	-1.34259	0.836124	-1.03078	0.504176	-1.10313	0.0316779	1.43985
ENSMUST00000041544 // Mm.249146 // adipose tissue| bladder| bone| bone marrow| brain| c	ENSMUST00000041544 // Fbln2 // fibulin 2 // 6 D|6 37.2 cM // 14115 /// ENSMUST000001134	ENSMUST00000041544	Fbln2	79.2892	50.1341	1.58154	6.35703e-07	-3.84058	1.00946e-05	-3.15482	0.00331766	-2.03242	0.363707	-1.23164	0.67308	-1.10117	0.233717	-1.31548	0.000600845	-2.33149	0.00649288	-1.91938	0.0117169	-1.82132	0.457449	-1.18547	0.528626	-1.15503	0.639339	1.11301	0.0708036	-1.5236	0.889252	1.03228	0.332738	-1.24899	0.852273	-1.04891	0.934995	-1.02113	0.470413	-1.17967	0.781686	1.0653	0.806312	-1.0649
NM_134189 // Mm.271670 // bladder| bone| bone marrow| brain| connective tissue| embryon	NM_134189 // Galnt10 // UDP-N-acetyl-alpha-D-galactosamine:polypeptide N-acetylgalactos	NM_134189	Galnt10	474.349	145.993	3.24911	6.97133e-15	-3.83699	2.88765e-07	-1.97725	0.925309	-1.01046	0.220294	-1.14724	0.614123	-1.05764	0.518917	1.07441	0.000343828	-1.5413	0.00117486	-1.47124	0.00650189	-1.3731	0.00473589	-1.39145	0.0229916	1.29821	0.47969	1.08187	0.135402	1.18307	0.229602	-1.14405	0.0167925	-1.31718	0.0416149	1.29825	0.0227284	1.34159	0.194843	1.15655	0.602556	1.0596	0.0209196	-1.34743
NM_175523 // Mm.489618 // bone marrow| brain| embryonic tissue| eye| heart| mammary gla	NM_175523 // Ppm1k // protein phosphatase 1K (PP2C domain containing) // 6 B3|6 // 2433	NM_175523	Ppm1k	348.467	193.054	1.80502	1.41912e-14	-3.82506	1.83626e-12	-3.12315	4.0523e-06	-1.82735	8.40911e-05	1.63897	0.00288938	1.43029	0.0687443	1.23454	0.416766	-1.09679	0.228812	-1.14754	0.00343357	-1.42011	0.149971	-1.17975	3.22882e-05	1.69698	0.00369721	1.41574	0.51476	-1.07681	0.596516	-1.06193	0.768108	1.03399	5.0771e-06	1.95116	4.30399e-05	1.7906	0.99961	-1.00006	0.338026	1.11537	0.800335	-1.03273
NM_008689 // Mm.256765 // bladder| blood| bone| bone marrow| brain| connective tissue|	NM_008689 // Nfkb1 // nuclear factor of kappa light polypeptide gene enhancer in B cell	NM_008689	Nfkb1	322.925	322.166	1.00236	5.29873e-15	-3.81569	2.80527e-09	-2.299	0.038974	-1.26179	0.0392971	-1.26128	0.57728	1.06309	0.356177	-1.10698	0.0401481	-1.25996	0.527144	-1.07192	0.0288131	-1.28027	0.573008	1.06382	5.73603e-05	-1.63435	1.85716e-07	-1.98967	0.390617	-1.0991	7.06856e-06	-1.75749	0.944846	1.00761	0.00220582	-1.49306	0.0317039	-1.31324	0.525683	1.07218	0.496863	-1.07751	0.50985	1.08475
NM_207258 // Mm.87624 // testis| adult /// ENSMUST00000090487 // Mm.87624 // testis| ad	NM_207258 // Fam71f1 // family with sequence similarity 71, member F1 // 6 A3.3|6 // 33	NM_207258	Fam71f1	214.772	47.3417	4.53663	8.03178e-12	-3.81226	3.70915e-10	-3.18337	0.156565	-1.22308	0.272522	-1.16784	0.163642	1.21885	0.01209	1.44332	0.355951	-1.13909	0.655503	-1.06468	0.206587	1.19607	0.0537868	1.31946	0.897983	-1.01815	0.634264	-1.06913	0.947217	-1.00933	0.545736	-1.08868	0.316285	1.15202	0.621899	1.08098	0.567538	1.09451	0.58497	1.07979	0.656925	1.06438	0.405504	1.14079
NM_008105 // Mm.314757 // bladder| bone| bone marrow| brain| embryonic tissue| extraemb	NM_008105 // Gcnt2 // glucosaminyl (N-acetyl) transferase 2, I-branching enzyme // 13 A	NM_008105	Gcnt2	798.08	398.462	2.0029	1.73186e-17	-3.81007	9.42532e-09	-1.93663	7.42407e-05	-1.49668	0.00602761	1.30267	0.000613583	1.40393	0.344145	1.09109	0.018398	1.25107	0.454579	1.07118	0.0126354	-1.26871	0.392884	-1.08182	2.94245e-08	1.87404	1.11972e-05	1.58152	0.000355437	1.42783	8.97796e-05	1.48828	0.351682	1.0896	0.0793504	1.20234	0.326168	1.10706	0.132674	-1.15004	0.90284	-1.01125	0.743729	1.03425
NM_001128151 // Mm.333357 // bone marrow| brain| embryonic tissue| eye| fertilized ovum	NM_001128151 // Cecr2 // cat eye syndrome chromosome region, candidate 2 // 6 F1|6 54.0	NM_001128151	Cecr2	430.154	832.577	0.516654	1.60896e-22	-3.79589	2.22153e-17	-2.5782	8.46052e-05	-1.32964	0.00372535	-1.22187	0.88078	1.00985	0.474635	1.048	1.26427e-07	-1.51936	0.124507	-1.10733	0.0215319	-1.16826	4.2177e-06	-1.4148	0.056385	1.13622	0.00382923	1.22106	0.0437086	1.14496	0.0104113	1.19102	0.365758	1.06123	0.307627	-1.07835	0.132032	1.11879	0.426621	-1.05356	0.121028	1.10842	0.31022	1.0779
NM_178739 // Mm.55685 // bladder| brain| embryonic tissue| eye| intestine| lung| mammar	NM_178739 // Dcaf12l1 // DDB1 and CUL4 associated factor 12-like 1 // X A4|X // 245404	NM_178739	Dcaf12l1	98.5859	144.07	0.68429	4.32614e-10	-3.78867	6.38714e-11	-4.19788	0.00051743	-1.84174	3.48617e-11	-4.33876	0.000103723	-2.00798	0.674782	-1.07059	0.266354	-1.19954	0.0996555	1.31275	0.0842317	1.33092	0.631511	-1.08111	3.93433e-08	2.99946	0.788649	-1.04451	0.000182792	1.9485	0.00442216	-1.6283	0.00338234	-1.6547	0.576903	1.10738	0.0158862	-1.57947	0.0931494	-1.32008	5.41718e-06	-2.33824	0.0170203	-1.57136
NM_029441 // Mm.159575 // bone| bone marrow| brain| embryonic tissue| eye| liver| lung|	NM_029441 // Cdyl2 // chromodomain protein, Y chromosome-like 2 // 8 E1|8 // 75796 ///	NM_029441	Cdyl2	280.679	742.388	0.378076	3.30816e-20	-3.78453	1.7481e-19	-3.55508	4.75964e-10	-1.85835	0.108147	-1.13189	0.782707	1.02114	0.772166	1.02221	0.320689	-1.07873	0.849528	-1.01449	0.724839	1.02707	0.905781	1.00902	3.70141e-06	-1.50033	0.000575888	-1.32637	1.42658e-05	-1.45298	3.10674e-05	-1.42608	0.413588	1.06425	0.739711	1.02873	0.691455	1.03443	0.418764	1.06351	0.621922	-1.03816	0.458106	1.0655
NM_001159396 // Mm.105218 // adipose tissue| bone| bone marrow| brain| connective tissu	NM_001159396 // Irf1 // interferon regulatory factor 1 // 11 B1.3|11 29.0 cM // 16362 /	NM_001159396	Irf1	247.61	205.036	1.20764	1.07826e-12	-3.77999	9.44364e-06	-1.92815	0.239085	-1.16677	0.0659316	1.27645	0.896905	1.01697	0.965282	-1.00567	0.0291832	1.33928	0.737879	-1.04444	0.899637	1.01651	0.501555	-1.09146	0.728801	1.04608	0.159502	-1.20324	1.14327e-05	-1.91317	3.90474e-06	-1.99861	0.0863314	-1.25482	6.70745e-08	2.61831	4.53463e-05	1.94493	0.624688	1.06568	0.715798	-1.04845	0.0049307	-1.54047
NM_001002897 // Mm.332252 // blood| brain| embryonic tissue| eye| lung| mammary gland|	NM_001002897 // Atg9b // autophagy related 9B // 5 A3|5 9.0 cM // 213948 /// ENSMUST000	NM_001002897	Atg9b	80.8931	42.133	1.91995	2.22565e-14	-3.77998	1.854e-10	-2.62832	0.820033	-1.02627	0.000339812	1.55996	0.000588812	1.52737	0.0165648	1.32778	0.0033163	-1.42507	0.00832622	-1.36988	0.13929	-1.18634	0.0308353	-1.28871	0.0543374	-1.25183	0.959506	-1.0058	0.195572	-1.16077	0.380092	1.10574	0.460347	-1.08808	0.94176	-1.0094	0.781736	1.03613	0.727979	1.04046	0.314827	1.12219	0.388564	-1.11731
NM_016768 // Mm.239941 // adrenal gland| bladder| blood| brain| embryonic tissue| extra	NM_016768 // Pbx3 // pre B cell leukemia homeobox 3 // 2 B|2 22.0 cM // 18516 /// ENSMU	NM_016768	Pbx3	678.681	170.718	3.97545	1.09195e-14	-3.77825	2.1528e-10	-2.55597	0.000479525	-1.52418	1.20156e-05	-1.74086	0.00443602	-1.3966	0.367158	-1.10617	0.0123887	-1.33644	0.00106327	-1.47862	0.887589	-1.01586	0.815237	1.02636	0.688014	1.04575	0.0429601	1.26035	0.512697	1.0758	0.4208	1.09415	0.224642	-1.14619	0.0320933	-1.31811	0.322566	1.13257	0.0329214	-1.27708	0.902608	-1.01371	0.290512	-1.14241
NR_028261 // Mm.293263 // brain| connective tissue| embryonic tissue| extraembryonic ti	NR_028261 // Rian // RNA imprinted and accumulated in nucleus // 12 F1|12 54.5 cM // 75	NR_028261	Rian	851.546	1143.23	0.74486	3.95813e-15	-3.7631	1.71865e-10	-2.49315	0.000200653	-1.54946	0.00301308	-1.40164	0.0211614	-1.29219	0.217992	1.14295	0.71033	1.04073	0.370533	1.1015	0.331471	1.11065	0.301913	-1.11811	1.91339e-08	-2.11875	2.07197e-07	-1.95591	0.2809	-1.12377	0.0718119	-1.21833	0.732988	1.03735	0.0512516	-1.27271	0.339981	-1.12281	0.00208684	1.42175	0.0051374	1.37224	0.970718	-1.00444
NM_008161 // Mm.200916 // blood| bone| bone marrow| brain| connective tissue| embryonic	NM_008161 // Gpx3 // glutathione peroxidase 3 // 11|11 B3-B5 // 14778 /// U13705 // Gpx	NM_008161	Gpx3	350.911	178.893	1.96157	9.40331e-13	-3.75572	4.15222e-07	-2.17161	0.495463	-1.0919	0.0801097	-1.25808	0.0058994	1.4509	0.0417961	1.30859	0.0417863	-1.30861	0.033077	1.3262	0.00113914	1.56645	0.808032	1.03175	1.38307e-06	2.06969	0.00277277	1.50406	0.00216243	1.5215	0.275671	1.15173	0.290793	-1.14664	0.0864545	1.28725	0.333713	1.15088	0.631881	-1.06364	0.304759	-1.14211	0.324232	-1.15412
NM_172632 // Mm.254517 // brain| eye| inner ear| kidney| mammary gland| pancreas| spina	NM_172632 // Mapk4 // mitogen-activated protein kinase 4 // 18 E2|18 // 225724 /// ENSM	NM_172632	Mapk4	67.2336	114.864	0.585333	5.19363e-11	-3.75139	3.92921e-07	-2.45459	0.0237191	-1.41519	7.06269e-06	2.1477	1.49144e-07	2.56687	0.0352113	1.37975	1.26607e-08	-2.87881	1.90852e-05	-2.05022	0.000169025	-1.84746	0.0244246	-1.41258	0.0120695	1.47471	0.0273937	1.40234	0.724103	1.05386	0.0179095	-1.44008	0.223243	-1.20033	0.00174805	1.74573	4.4455e-06	2.41825	0.835193	1.03138	0.945986	-1.01011	0.0302169	-1.45189
NM_001081162 // Mm.441391 // bone marrow| brain| embryonic tissue| eye| inner ear| join	NM_001081162 // Slc4a11 // solute carrier family 4, sodium bicarbonate transporter-like	NM_001081162	Slc4a11	990.739	366.363	2.70425	5.95367e-14	-3.7506	1.2511e-09	-2.50799	0.148265	-1.18704	1.38132e-06	-1.93838	0.0621284	-1.25015	0.767495	1.03522	3.24841e-06	-1.87894	0.000441219	-1.56258	0.0130786	-1.353	0.0218932	-1.31993	8.66306e-05	-1.66386	0.000419295	-1.56572	1.15886e-06	-1.9508	8.74706e-08	-2.14309	8.05342e-05	-1.66846	0.375224	-1.12431	0.108026	-1.23969	0.00897507	-1.37679	1.59904e-05	-1.77225	0.000128038	-1.74262
ENSMUST00000044005 // Mm.108729 // brain| embryonic tissue| liver| lung| testis| cleava	ENSMUST00000044005 // Atf7ip2 // activating transcription factor 7 interacting protein	ENSMUST00000044005	Atf7ip2	581.945	551.547	1.05511	2.34143e-13	-3.75056	1.59837e-10	-2.84291	0.000750033	-1.56079	0.00235998	-1.48575	0.942815	1.00883	0.650446	1.05715	2.05608e-06	-1.96944	0.0181356	-1.35014	0.00234372	-1.4862	0.0130784	-1.37233	0.452435	1.09677	0.00432915	1.44591	0.0103657	1.38796	4.61759e-07	2.08465	0.183835	1.17901	0.000947064	-1.63096	0.0234795	-1.38053	0.596877	-1.06705	0.0637978	1.26136	0.0136	1.424
NM_172473 // Mm.458633 // bladder| bone| brain| connective tissue| embryonic tissue| ey	NM_172473 // Hace1 // HECT domain and ankyrin repeat containing, E3 ubiquitin protein l	NM_172473	Hace1	347.61	395.299	0.879359	1.87433e-19	-3.74264	2.31991e-15	-2.69751	1.53845e-08	-1.74746	0.00752199	1.24794	0.0176261	1.21496	0.379436	1.07234	0.00901856	-1.24101	6.28845e-05	-1.42224	0.00357933	-1.2758	8.90066e-05	-1.40968	6.01367e-09	1.78899	1.47817e-06	1.56141	0.0921383	1.14528	0.967226	1.00325	0.0288443	-1.19517	0.000173291	1.44269	0.000431346	1.40436	0.726085	1.02811	0.955069	1.00446	0.425578	-1.07366
NM_001177527 // Mm.480188 // brain| extraembryonic tissue| eye| pancreas| skin| fetus|	NM_001177527 // Zfp964 // zinc finger protein 964 // 8 B3.3|8 // 636741 /// ENSMUST0000	NM_001177527	Zfp964	232.354	88.9067	2.61346	8.26857e-17	-3.69427	1.23463e-12	-2.60303	8.53785e-07	-1.72451	0.688126	1.03843	0.897544	1.01216	0.163212	-1.14171	1.40524e-06	-1.69963	3.65896e-05	-1.54403	4.91332e-06	-1.63854	0.0172773	-1.261	1.03491e-06	1.71487	0.00137055	1.37918	0.925218	1.00885	0.0571935	-1.20052	0.384496	1.08548	0.00804428	1.34002	1.59631e-05	1.67504	0.00093146	-1.3967	0.369411	-1.08837	0.892492	-1.01436
NM_016673 // Mm.425178 // brain| embryonic tissue| eye| mammary gland| nasopharynx| pan	NM_016673 // Cntfr // ciliary neurotrophic factor receptor // 4 A5|4 19.9 cM // 12804 /	NM_016673	Cntfr	55.0335	114.791	0.479422	6.80322e-09	-3.68471	2.0596e-06	-2.68067	0.0138764	-1.57821	1.08091e-07	-3.15625	0.000455432	-1.96996	0.0299061	-1.49051	0.404098	-1.16111	0.140833	1.30501	0.0124091	1.59089	0.00464969	1.70198	4.09826e-09	-3.79204	4.79575e-10	-4.28898	9.08019e-08	-3.18697	2.68451e-11	-5.08643	0.00126269	-1.85082	4.16894e-05	-2.50564	0.0195676	-1.62339	1.21237e-05	-2.42849	5.90579e-05	-2.22021	0.000480594	-2.1344
NM_001099297 // Mm.108582 // embryonic tissue| mammary gland| vagina| organogenesis| ju	NM_001099297 // Duox1 // dual oxidase 1 // 2 E5|2 // 99439 /// ENSMUST00000099461 // Du	NM_001099297	Duox1	42.5041	36.5728	1.16218	1.21168e-10	-3.67181	2.24457e-07	-2.55637	0.39474	-1.13769	0.00300428	-1.60712	0.0916353	-1.29595	0.473445	1.11462	0.0298826	-1.40198	0.378228	-1.14294	0.282318	1.17753	0.10821	1.27946	0.564745	-1.09096	0.676439	-1.06506	0.94352	-1.01075	0.769463	-1.04523	0.26542	-1.18456	0.008001	-1.60132	0.00427217	-1.66717	0.733336	1.05278	0.758351	-1.04754	0.108668	1.31854
NM_133237 // Mm.391102 // adrenal gland| bone marrow| brain| dorsal root ganglion| embr	NM_133237 // Apcdd1 // adenomatosis polyposis coli down-regulated 1 // 18 E1|18 // 4945	NM_133237	Apcdd1	314.756	102.138	3.08167	1.00521e-11	-3.66931	5.99973e-10	-3.04199	1.44417e-06	-2.1714	0.981541	-1.00318	0.432699	1.11431	0.876015	1.02167	0.97584	-1.00417	0.824894	1.03088	0.437314	-1.1131	0.00688895	-1.47633	0.0378021	-1.34118	0.00542265	-1.49489	0.00148862	1.59468	0.612404	-1.07222	0.825379	-1.03079	0.00258133	-1.63891	0.481467	-1.1152	0.219524	1.18574	0.356227	1.13595	0.415875	-1.13445
NM_172701 // Mm.38907 // bladder| brain| embryonic tissue| eye| mammary gland| nasophar	NM_172701 // Oscp1 // organic solute carrier partner 1 // 4 D2.2|4 // 230751 /// AB2869	NM_172701	Oscp1	72.7741	71.6339	1.01592	2.08125e-08	-3.66859	3.45448e-06	-2.72509	0.0467632	-1.46349	0.211386	-1.2657	0.195352	1.27676	0.6101	-1.10002	7.03575e-05	2.2812	1.27027e-07	3.30093	2.99891e-06	2.74761	6.09623e-06	2.63632	0.819553	1.04351	0.114013	-1.34958	0.0756034	-1.40285	0.0144142	-1.60793	0.169481	-1.29638	0.046284	1.53554	0.47992	1.16023	0.628337	-1.0947	0.379631	-1.17915	0.0635901	-1.48861
NM_016917 // Mm.28756 // bone| bone marrow| brain| embryonic tissue| extraembryonic tis	NM_016917 // Slc40a1 // solute carrier family 40 (iron-regulated transporter), member 1	NM_016917	Slc40a1	1134.99	469.597	2.41695	9.99644e-08	-3.66053	3.01813e-06	-2.95998	0.000749005	-2.0723	0.0378957	1.53424	0.00885131	1.73138	0.270551	1.24933	0.894196	1.02702	0.588173	1.11488	0.0784842	-1.43319	0.0518524	-1.49108	1.12132e-10	5.6599	5.46291e-08	3.8016	1.8033e-05	2.6454	0.00362293	1.85273	0.187829	-1.30604	6.97206e-05	2.70723	0.0462116	1.58535	0.0299735	1.56627	0.82397	-1.04561	0.811816	-1.05511
NM_194334 // Mm.335347 // adipose tissue| bladder| blood| brain| embryonic tissue| extr	NM_194334 // Tbc1d2b // TBC1 domain family, member 2B // 9 E3.1|9 // 67016 /// ENSMUST0	NM_194334	Tbc1d2b	311.929	222.568	1.4015	3.13135e-14	-3.65533	0.000374694	-1.54442	0.929599	1.00997	0.0004424	-1.53476	0.269099	-1.13328	0.31113	-1.12134	0.225022	-1.1475	0.530506	-1.07318	0.0515171	-1.2513	0.184851	-1.16258	0.244519	-1.14096	0.892552	-1.01529	0.043498	1.26223	0.717313	-1.04154	0.162888	-1.17202	0.0161061	-1.37089	0.817534	1.02956	0.755282	1.03565	0.924435	-1.01071	0.175597	-1.18885
NM_033523 // Mm.266627 // bone| bone marrow| brain| dorsal root ganglion| embryonic tis	NM_033523 // Spred2 // sprouty-related, EVH1 domain containing 2 // 11|11 A3.2 // 11471	NM_033523	Spred2	765.285	521.271	1.46811	3.13338e-19	-3.65328	3.41207e-14	-2.47608	0.000157049	-1.38762	0.622379	-1.03963	0.554884	1.04773	0.878584	1.01211	4.93401e-05	-1.42923	0.000546011	-1.34298	0.000157952	-1.38742	7.6361e-06	-1.4973	0.275395	1.09046	0.000803401	1.32909	2.70438e-06	1.53606	1.999e-06	1.54749	0.551026	-1.04821	2.10452e-07	-1.73766	0.0285871	-1.22137	0.411491	-1.06715	0.222272	1.10197	0.272766	1.1028
NM_001159487 // Mm.2605 // brain| embryonic tissue| extraembryonic tissue| heart| intes	NM_001159487 // Rbp4 // retinol binding protein 4, plasma // 19 D1|19 38.0 cM // 19662	NM_001159487	Rbp4	195.742	78.611	2.49001	1.51218e-15	-3.62405	4.71187e-13	-2.90537	0.00228511	-1.38862	1.60518e-05	-1.64033	0.0433112	-1.23373	0.285085	-1.11516	0.000597946	-1.45599	9.28896e-05	-1.54982	0.111929	-1.17768	0.00178184	-1.40117	3.38614e-12	2.70663	2.42128e-14	3.24748	1.50227e-10	2.37593	9.47507e-10	2.23551	0.620497	1.05147	0.00139596	1.47522	0.000118171	1.62158	0.19088	1.14323	0.885026	-1.01474	0.513909	-1.07728
NM_172546 // Mm.37984 // bone marrow| brain| embryonic tissue| fertilized ovum| heart|	NM_172546 // Cnksr3 // Cnksr family member 3 // 10 A1|10 // 215748 /// ENSMUST000000153	NM_172546	Cnksr3	167.662	173.809	0.964632	4.32095e-20	-3.62062	1.78808e-17	-2.93747	1.90039e-09	-1.76937	0.0374651	-1.1713	0.893053	1.00998	0.278246	1.08406	0.12139	-1.12325	0.165994	-1.10917	0.0612888	-1.15194	0.0154789	-1.20425	3.88901e-05	1.40562	9.94476e-07	1.53026	0.782474	-1.02062	0.367978	-1.06914	0.00892099	-1.22393	3.44328e-06	1.56196	0.000212445	1.40057	0.015529	1.20413	0.460524	-1.05623	0.226426	-1.10668
NM_001253706 // Mm.260036 // bladder| blood| bone| bone marrow| brain| dorsal root gang	NM_001253706 // Sept6 // septin 6 // X|X A2 // 56526 /// ENSMUST00000053456 // Sept6 //	NM_001253706	Sept6	296.541	248.982	1.19101	2.37766e-14	-3.61889	1.27607e-09	-2.38045	0.000913644	-1.4828	6.27541e-06	1.773	6.85754e-06	1.76757	0.00305017	1.41444	0.040789	-1.26138	0.624944	-1.05557	0.209525	-1.1503	0.000309315	-1.54418	5.33361e-05	-1.64525	0.144282	1.17764	0.00211881	-1.43516	0.719338	-1.04052	0.738268	-1.03762	0.136196	-1.20637	0.00682986	1.42227	0.0779223	-1.21981	0.990387	1.00133	0.142375	-1.20277
NM_009662 // Mm.41072 // blood| bone| bone marrow| brain| embryonic tissue| heart| inne	NM_009662 // Alox5 // arachidonate 5-lipoxygenase // 6 F1|6 53.2 cM // 11689 /// ENSMUS	NM_009662	Alox5	82.6524	79.5241	1.03934	2.81537e-15	-3.61324	2.95892e-10	-2.35743	0.12546	1.17378	0.674297	1.04428	0.027527	1.26403	0.487787	1.07431	1.58765e-15	-3.69927	7.03633e-13	-2.91652	8.84352e-14	-3.15295	5.40414e-11	-2.49825	0.0177878	1.28817	6.41064e-05	1.58114	5.45172e-05	-1.58964	0.396173	-1.09176	0.00728079	-1.33614	8.2767e-06	1.80385	0.00889792	1.37249	0.885079	1.015	0.397098	-1.09157	0.205318	-1.15962
NM_001177945 // Mm.41583 // bone marrow| brain| connective tissue| embryonic tissue| ey	NM_001177945 // 1810020D17Rik // RIKEN cDNA 1810020D17 gene // 7 E2|7 // 66273 /// ENSM	NM_001177945	1810020D17Rik	225.99	76.1721	2.96683	1.75552e-16	-3.61276	1.22745e-13	-2.83276	0.000498243	-1.42801	8.83053e-05	-1.50718	1.7042e-05	-1.58384	0.866232	1.01603	0.00343151	-1.33952	0.00851158	-1.29688	0.161293	1.14332	0.485705	-1.06825	0.963264	-1.00436	0.0331245	-1.23023	0.0390047	1.22186	0.0951058	-1.17405	0.0849117	1.18037	0.0774374	1.21065	0.035034	1.25885	0.511345	1.06415	0.548661	-1.0584	0.119298	-1.18278
NM_030595 // Mm.384353 // bladder| brain| dorsal root ganglion| embryonic tissue| eye|	NM_030595 // Nbea // neurobeachin // 3 C|3 28.9 cM // 26422 /// ENSMUST00000029374 // N	NM_030595	Nbea	185.97	243.669	0.763205	5.38803e-17	-3.61215	2.0324e-12	-2.4892	0.00266143	-1.33685	0.00712042	1.29299	0.00139355	1.36523	0.690099	-1.03701	0.000162131	-1.45876	0.0248559	-1.23504	3.79438e-05	-1.52245	0.00204003	-1.34854	0.0035601	1.32399	0.102155	1.16348	0.0324887	1.22212	0.540609	1.05743	0.205714	-1.12346	9.84703e-05	1.5541	0.0310572	1.25533	5.83256e-07	1.71496	0.0014352	1.36394	0.544459	1.06412
NM_027399 // Mm.85429 // bone marrow| brain| embryonic tissue| kidney| lung| mammary gl	NM_027399 // Steap1 // six transmembrane epithelial antigen of the prostate 1 // 5 A1|5	NM_027399	Steap1	342.647	276.087	1.24108	1.6689e-14	-3.60407	0.000162242	-1.57044	0.305054	1.11895	3.41632e-06	-1.79493	0.0100782	-1.33976	0.11551	-1.19015	0.576871	-1.06274	0.427299	1.09062	0.885613	-1.01578	0.397541	1.09692	0.235792	1.13907	0.469711	1.08215	0.0137086	1.32202	0.14566	1.17416	0.0313582	1.27312	0.288738	-1.13961	0.65984	-1.05537	0.698783	-1.04306	0.763906	-1.03325	0.144249	1.19847
NM_001081009 // Mm.274466 // bone marrow| brain| connective tissue| dorsal root ganglio	NM_001081009 // Parp8 // poly (ADP-ribose) polymerase family, member 8 // 13 D2.3|13 71	NM_001081009	Parp8	246.934	67.6581	3.64973	3.38682e-12	-3.59836	1.79473e-10	-3.02	8.55798e-06	-1.93906	0.420386	-1.11106	0.824657	-1.02927	0.627065	-1.06538	3.59121e-06	2.00884	2.77382e-07	2.22821	1.01191e-07	2.32112	1.25719e-07	2.30077	0.111149	-1.23467	0.0440888	1.30875	5.32271e-06	-1.97696	0.00883638	-1.42832	2.47041e-05	-1.85648	0.16882	-1.22596	0.20119	-1.20795	0.0190452	-1.37214	0.0010872	-1.57834	0.0807056	-1.29766
NM_025639 // Mm.23596 // blood| bone marrow| brain| connective tissue| embryonic tissue	NM_025639 // Cenpm // centromere protein M // 15 E2|15 // 66570 /// ENSMUST00000089157	NM_025639	Cenpm	368.759	732.909	0.503144	3.76465e-18	-3.5974	2.49989e-11	-2.15223	0.0851657	-1.15837	0.000383988	-1.38192	0.63979	-1.04004	0.00844645	1.25974	0.00129388	-1.33459	0.00437864	-1.28636	0.714504	-1.03114	0.361617	-1.07986	0.00175767	-1.32257	0.170431	-1.12327	0.288746	-1.09365	0.593644	-1.04579	0.674775	1.03582	0.00267794	-1.34976	0.189789	-1.13292	0.495108	-1.05899	0.992518	-1.00079	0.353924	1.0917
ENSMUST00000026565 // Mm.141021 // adipose tissue| bladder| blood| bone| bone marrow| b	ENSMUST00000026565 // Ifitm3 // interferon induced transmembrane protein 3 // 7 F5|7 //	ENSMUST00000026565	Ifitm3	85.9296	1267.09	0.0678167	5.68909e-11	-3.59358	4.9332e-07	-2.36687	0.0370023	-1.36253	3.11739e-06	2.17915	0.000373519	1.74717	0.126594	1.25056	1.93649e-22	18.6707	1.37796e-19	11.3352	1.53727e-16	7.16585	3.39742e-17	7.86378	1.40224e-05	-2.03609	0.0344107	-1.36885	0.346448	1.14626	0.31577	1.15669	0.94123	1.01068	0.000731241	-1.80418	0.108603	-1.30249	0.0148554	1.44063	0.0408916	1.35379	0.466767	1.12556
ENSMUST00000026296 // Mm.8142 // bone marrow| brain| embryonic tissue| extraembryonic t	ENSMUST00000026296 // Fgd1 // FYVE, RhoGEF and PH domain containing 1 // X F3|X 64.0 cM	ENSMUST00000026296	Fgd1	327.846	568.608	0.576578	7.64351e-17	-3.59299	9.04401e-11	-2.22321	0.0253846	-1.23574	0.0103604	1.27798	0.0234855	1.23948	0.837094	-1.01903	0.500396	1.06389	0.912191	-1.01016	0.675488	-1.03915	0.123873	-1.15395	0.170631	1.13553	0.14998	-1.14306	2.12339e-05	1.55267	0.749101	1.02976	0.523317	-1.06039	0.20275	1.14173	0.0167784	1.2913	0.00436806	1.31726	0.00938814	1.28252	0.0313212	-1.25672
BC039993 // Mm.234165 // bone marrow| brain| embryonic tissue| eye| kidney| liver| lung	BC039993 // 2610318N02Rik // RIKEN cDNA 2610318N02 gene // 16 A3|16 // 70458 /// ENSMUS	BC039993	2610318N02Rik	414.554	1311.32	0.316136	1.23468e-21	-3.58923	3.17711e-16	-2.42463	4.02098e-08	-1.56526	2.66213e-09	-1.65695	0.00140185	-1.25431	0.965669	1.00286	0.859542	1.0118	0.872498	1.0107	0.338494	-1.06592	0.112044	-1.11305	3.02119e-07	-1.50136	0.54776	-1.04076	1.78714e-06	-1.44737	0.00097525	-1.26488	0.743933	1.02191	0.0839024	1.14031	0.0322198	1.1787	0.00105582	1.26257	0.602293	1.03522	0.247502	1.09079
NM_172961 // Mm.259315 // brain| dorsal root ganglion| embryonic tissue| extraembryonic	NM_172961 // Abat // 4-aminobutyrate aminotransferase // 16|16 A3 // 268860 /// ENSMUST	NM_172961	Abat	118.252	75.5333	1.56557	3.13565e-22	-3.58657	1.09641e-21	-3.43157	1.46136e-09	-1.6452	3.78311e-05	-1.34234	0.0321845	-1.15112	0.0671062	-1.12673	7.867e-08	-1.51813	7.48166e-06	-1.38689	0.163974	-1.09403	0.0732817	1.12368	0.582365	-1.03576	0.00045435	-1.27455	3.4006e-06	-1.40886	1.82992e-09	-1.63764	0.138719	1.10049	0.64479	-1.03362	0.870402	1.01176	1.82481e-07	-1.49297	3.01646e-05	-1.34853	0.618731	1.03635
NM_001164362 // Mm.9916 // bone marrow| brain| connective tissue| embryonic tissue| ext	NM_001164362 // Cep55 // centrosomal protein 55 // 19|19 C3 // 74107 /// NM_028760 // C	NM_001164362	Cep55	1070.83	1638.09	0.653707	3.46786e-23	-3.58624	1.4231e-20	-2.93895	4.56272e-06	-1.37278	4.88694e-07	-1.43119	0.0114166	-1.17137	0.648624	1.02773	0.0079262	1.18145	0.0125268	1.16878	0.653322	1.02733	0.000980094	1.23662	0.0133085	1.16708	8.07867e-06	1.35814	0.121627	1.09885	0.0191039	1.1568	0.593138	1.03261	0.0507306	1.14447	0.00114888	1.2648	0.695399	1.02378	0.698524	1.02352	0.776736	-1.0193
NM_027468 // Mm.339332 // bladder| brain| embryonic tissue| extraembryonic tissue| eye|	NM_027468 // Cpm // carboxypeptidase M // 10 D2|10 // 70574 /// ENSMUST00000020399 // C	NM_027468	Cpm	485.82	50.3978	9.6397	1.74151e-09	-3.57859	2.82385e-10	-3.94343	0.00136139	-1.75723	0.0462059	-1.40001	0.865417	-1.02827	0.123147	1.2937	0.0650538	-1.36373	0.182309	-1.24843	0.447753	-1.13351	0.00987857	-1.55782	1.39919e-05	2.25086	0.00353871	1.66089	0.0166015	1.5054	0.00141106	1.75359	0.872667	1.02671	0.0238231	-1.54007	0.00804756	-1.67005	0.000650664	-1.83261	0.166834	-1.25886	0.173263	1.29007
ENSMUST00000063091 // Mm.4848 // blood| bone marrow| brain| embryonic tissue| eye| fert	ENSMUST00000063091 // Fyn // Fyn proto-oncogene // 10 B1|10 25.0 cM // 14360 /// NM_001	ENSMUST00000063091	Fyn	422.542	324.027	1.30403	1.16126e-11	-3.57358	5.22938e-08	-2.46779	0.000403857	-1.68244	0.133355	-1.22889	0.788845	1.03692	0.649702	1.06347	0.085723	-1.2675	0.397316	-1.12195	0.0442372	-1.32251	0.484392	-1.09957	0.000114164	1.78021	0.000829512	1.62765	0.224424	1.18054	0.755729	-1.04302	0.079445	-1.27398	0.055531	1.34739	0.0945544	1.29546	0.921821	-1.01337	0.210739	-1.18659	0.350219	-1.15355
NM_001042660 // Mm.34407 // bladder| bone| bone marrow| brain| embryonic tissue| extrae	NM_001042660 // Smad7 // SMAD family member 7 // 18 E2|18 // 17131 /// ENSMUST000000269	NM_001042660	Smad7	1283.2	928.051	1.38269	1.17335e-17	-3.56072	6.4774e-16	-3.07468	2.17011e-06	-1.60677	0.00133247	-1.34357	0.00293051	-1.31145	0.0172394	-1.23676	0.00215501	-1.32403	0.00283046	-1.31288	0.180954	-1.1234	0.296981	-1.0945	1.47841e-08	1.83671	1.72865e-05	1.51946	9.62521e-06	1.54374	0.747228	1.02811	0.238689	-1.10762	6.10794e-06	1.65145	0.000480289	1.44157	0.001675	1.33428	0.455465	-1.06651	0.147854	-1.15224
NM_134437 // Mm.206726 // bladder| brain| embryonic tissue| extraembryonic tissue| eye|	NM_134437 // Il17rd // interleukin 17 receptor D // 14 A3|14 // 171463 /// ENSMUST00000	NM_134437	Il17rd	327.353	363.643	0.900203	5.80464e-13	-3.56047	5.26407e-08	-2.24783	0.000391699	-1.59659	0.00222778	1.48411	6.94738e-05	1.71053	0.000631714	1.56557	0.000131116	-1.66831	0.00656591	-1.41387	0.00396031	-1.44684	9.04317e-06	-1.85039	0.000430525	1.59044	1.0145e-08	2.39354	0.00169867	-1.50163	0.7062	1.04686	0.469207	-1.09214	1.4896e-07	2.37699	7.74111e-07	2.21661	0.84237	1.02444	0.986042	-1.00213	0.664239	-1.06106
ENSMUST00000028426 // Mm.222222 // blood| bone marrow| brain| dorsal root ganglion| emb	ENSMUST00000028426 // Lass6 // LAG1 homolog, ceramide synthase 6 // 2 C2|2 // 241447 //	ENSMUST00000028426	Lass6	1365.25	516.488	2.64334	1.05171e-17	-3.56025	8.07501e-08	-1.75123	0.469696	-1.06412	0.000689175	-1.36873	0.0123753	-1.25018	0.0522539	-1.18583	0.000903495	-1.35786	0.0307334	-1.21027	0.459108	-1.06572	0.558027	1.05159	0.00129449	-1.34339	0.0132101	-1.24738	7.66118e-08	-1.75369	3.90867e-08	-1.78559	0.93713	-1.00678	0.032032	1.23701	0.00223782	1.36753	0.0598296	-1.17942	0.0729384	-1.16987	0.224918	-1.12519
NM_133218 // Mm.212908 // bladder| bone marrow| brain| embryonic tissue| extraembryonic	NM_133218 // Zfp704 // zinc finger protein 704 // 3 A1|3 // 170753 /// ENSMUST000000411	NM_133218	Zfp704	161.118	290.942	0.553779	1.92855e-11	-3.56023	7.01013e-10	-3.02203	1.98672e-05	-1.94028	0.000864283	-1.637	0.208549	-1.19081	0.519726	1.09278	0.12069	-1.24194	0.75605	-1.04365	0.444617	1.11123	0.529157	1.09059	0.0182331	1.40014	0.190938	-1.19933	0.240329	-1.17685	0.000525073	-1.67576	0.0327054	-1.35315	0.0449599	1.37423	0.680367	1.06576	0.883093	-1.02042	0.4275	-1.11573	0.363361	-1.15158
NM_001172092 // Mm.371655 // blood| bone| bone marrow| connective tissue| dorsal root g	NM_001172092 // Depdc1a // DEP domain containing 1a // 3 H4|3 // 76131 /// NM_029523 //	NM_001172092	Depdc1a	1238.22	990.189	1.25049	1.84193e-23	-3.54547	1.91337e-19	-2.64854	1.77897e-07	-1.44406	7.05792e-10	-1.59942	0.527943	-1.03764	0.856203	1.01064	1.58448e-12	-1.80394	0.00422933	-1.19276	5.21661e-09	-1.54057	8.89228e-06	-1.34493	1.0017e-07	1.45922	7.99084e-11	1.66771	0.00131723	1.22239	6.75184e-09	1.53322	0.218875	1.07519	0.342736	1.06461	0.00348293	1.22478	0.322864	-1.05981	0.00446507	1.19135	0.0550766	1.13758
NM_021361 // Mm.247195 // brain| embryonic tissue| eye| mammary gland| pancreas| spinal	NM_021361 // Nova1 // neuro-oncological ventral antigen 1 // 12 B3|12 20.0 cM // 664883	NM_021361	Nova1	110.533	233.889	0.472589	2.8145e-10	-3.5449	9.6841e-09	-2.9829	0.00142786	-1.67758	0.682301	-1.06412	0.0744523	1.31815	0.577854	1.08826	0.0587258	-1.34106	0.369833	-1.14652	0.0676013	-1.32752	0.00195247	-1.64962	0.630004	1.07592	0.387077	-1.14091	0.0981448	1.29093	0.702155	1.05977	0.62334	-1.07746	0.125563	1.30353	0.483099	-1.12739	0.0186127	1.44789	0.96225	-1.0072	0.375619	-1.16388
NM_010585 // Mm.227912 // bladder| bone| bone marrow| brain| embryonic tissue| extraemb	NM_010585 // Itpr1 // inositol 1,4,5-trisphosphate receptor 1 // 6 E1-E2|6 48.0 cM // 1	NM_010585	Itpr1	248.656	374.645	0.66371	1.01954e-16	-3.53195	5.09914e-08	-1.83969	0.0214134	-1.24264	8.88526e-05	1.48611	4.4043e-06	1.62095	0.117681	1.15604	0.000390925	-1.42143	0.178583	-1.13217	0.00136791	-1.36683	0.0247704	-1.23569	0.761648	-1.02807	3.48465e-05	1.52741	0.00163624	-1.35898	0.184242	-1.13032	0.174792	1.13344	1.58574e-05	1.65123	5.73602e-08	1.9762	0.0786817	1.1778	0.405112	1.07926	0.517935	1.0687
NM_198249 // Mm.9239 // bladder| bone marrow| brain| dorsal root ganglion| embryonic ti	NM_198249 // Arhgef40 // Rho guanine nucleotide exchange factor (GEF) 40 // 14 C2|14 //	NM_198249	Arhgef40	120.793	32.2275	3.74814	1.82936e-14	-3.52005	3.05334e-13	-3.14558	1.00887e-07	-2.00032	0.0112732	-1.32741	0.722245	-1.03885	0.185558	1.15428	3.86247e-06	-1.77149	0.0156266	-1.30887	0.823301	1.02422	0.206451	-1.14658	0.563091	-1.06406	0.594666	1.05878	0.000199785	-1.54812	0.0703545	-1.21907	0.00421347	-1.38215	0.376864	-1.11286	0.985302	1.00222	0.000440234	-1.50508	0.0989635	-1.19716	0.0427227	-1.2848
NM_001024468 // Mm.4606 // blood| bone| bone marrow| brain| connective tissue| dorsal r	NM_001024468 // Bcat1 // branched chain aminotransferase 1, cytosolic // 6 G3|6 73.9 cM	NM_001024468	Bcat1	526.056	680.905	0.772583	5.43591e-14	-3.51531	2.23245e-12	-3.02691	0.0344941	-1.27315	0.577619	-1.06385	0.791954	-1.02971	0.535281	1.07138	0.00325872	1.4128	0.380233	-1.10277	0.173237	1.16522	0.613795	1.05768	0.075384	1.22306	0.580028	-1.06344	0.852157	1.02089	0.00114372	-1.47257	0.763099	-1.03402	0.156309	1.19604	0.634669	1.06111	0.747928	-1.03632	0.00961063	-1.35013	0.589009	-1.0698
NM_008804 // Mm.10812 // brain| dorsal root ganglion| embryonic tissue| extraembryonic	NM_008804 // Pde9a // phosphodiesterase 9A // 17 B1|17 // 18585 /// NM_001163748 // Pde	NM_008804	Pde9a	240.839	194.433	1.23868	8.41769e-11	-3.50659	3.15902e-07	-2.40508	0.0012016	-1.64573	3.43356e-06	2.16219	1.14542e-07	2.51653	0.000505497	1.71751	0.75216	1.04639	0.448291	1.11541	0.727874	-1.05124	0.704391	-1.05601	0.509914	1.09948	0.0214883	1.40719	0.000506772	1.7173	0.596335	1.07913	0.510048	-1.09944	4.69834e-05	-2.08223	0.61824	-1.08381	0.0193255	-1.41616	0.00695261	-1.50135	0.338563	-1.16793
NM_175503 // Mm.24204 // bladder| brain| embryonic tissue| eye| mammary gland| testis|	NM_175503 // Aard // alanine and arginine rich domain containing protein // 15 C|15 //	NM_175503	Aard	557.445	124.485	4.478	1.00542e-16	-3.48842	3.62386e-17	-3.62894	0.00313548	-1.32643	0.532748	-1.05808	0.191394	-1.12666	0.57926	-1.05143	0.0123804	1.26523	0.14887	1.14121	0.00853774	1.28206	0.000420151	1.41322	0.000417281	-1.41351	4.83667e-11	-2.23885	0.00165563	1.3542	0.114284	-1.15592	0.285525	1.102	2.89388e-09	-2.15942	1.6151e-09	-2.20076	0.00171975	-1.35256	0.00137225	-1.36232	0.407898	-1.08798
ENSMUST00000099195 // Mm.355614 // bone| bone marrow| brain| dorsal root ganglion| embr	ENSMUST00000099195 // Pde7a // phosphodiesterase 7A // 3 A2|3 7.0 cM // 18583 /// NM_00	ENSMUST00000099195	Pde7a	351.401	470.333	0.747132	3.36009e-18	-3.47838	5.47962e-13	-2.34485	0.000244668	-1.38558	0.00166489	-1.31374	0.384956	1.07355	0.410921	1.06944	9.08951e-09	-1.79927	0.137824	-1.13017	7.71622e-06	-1.51622	5.59523e-05	-1.4408	6.5591e-05	1.43482	0.000113502	1.41427	0.68694	1.03334	0.423001	1.06759	0.602871	1.04328	0.0425654	1.20958	1.19219e-06	1.68349	0.026062	-1.20545	0.0232681	1.21018	0.94314	-1.00654
NM_172465 // Mm.207367 // bladder| blood| bone marrow| brain| connective tissue| embryo	NM_172465 // Zdhhc9 // zinc finger, DHHC domain containing 9 // X A4|X // 208884 /// EN	NM_172465	Zdhhc9	889.244	422.612	2.10416	6.05803e-13	-3.47615	1.67122e-08	-2.31354	0.00153923	-1.49724	0.000791555	1.53915	0.00130846	1.50747	0.211275	1.16253	0.190724	-1.17091	0.941466	-1.0088	0.103726	-1.21824	0.239868	-1.15191	5.50477e-06	1.86492	0.000195951	1.62771	0.000146652	1.64629	0.0325613	1.30035	0.664371	-1.05317	5.53941e-08	2.44022	5.62843e-07	2.21526	9.50363e-05	1.67426	0.0104485	1.37548	0.0280256	-1.35503
NM_080555 // Mm.348326 // adipose tissue| bladder| bone| brain| embryonic tissue| extra	NM_080555 // Ppap2b // phosphatidic acid phosphatase type 2B // 4 C6|4 52.7 cM // 67916	NM_080555	Ppap2b	284.304	606.129	0.46905	1.55163e-16	-3.46463	1.2681e-11	-2.34803	2.86436e-05	-1.5345	8.58937e-05	-1.48614	0.0086505	-1.28397	0.948045	1.00595	4.75676e-09	-1.96624	2.15396e-08	-1.88264	1.64365e-10	-2.17115	2.90811e-10	-2.13438	3.48568e-13	2.63459	1.02819e-08	1.92299	2.62765e-10	2.14085	5.88991e-07	1.71392	0.780481	1.02569	0.00394005	1.36523	0.0370092	1.24529	0.567021	-1.05358	0.570478	-1.05309	0.206031	-1.13954
NM_010404 // Mm.281700 // brain| dorsal root ganglion| embryonic tissue| extraembryonic	NM_010404 // Hap1 // huntingtin-associated protein 1 // 11 D|11 60.0 cM // 15114 /// EN	NM_010404	Hap1	212.258	140.007	1.51604	2.04152e-15	-3.46426	2.19154e-11	-2.4759	0.000106201	-1.52583	0.307029	1.10672	0.421283	1.08288	0.400558	1.08683	0.00412604	1.34793	0.0913633	1.1848	0.330977	1.10124	0.154483	-1.15287	1.79711e-14	-3.18574	2.15286e-12	-2.67954	3.24988e-06	-1.70146	5.20128e-07	-1.79978	0.305812	1.107	7.93221e-07	-1.90748	0.00442917	-1.39454	0.0513536	-1.21767	0.256013	-1.11956	0.490074	-1.07972
NM_008924 // Mm.253102 // adipose tissue| bone marrow| brain| embryonic tissue| extraem	NM_008924 // Prkar2a // protein kinase, cAMP dependent regulatory, type II alpha // 9 F	NM_008924	Prkar2a	921.556	697.012	1.32215	5.05649e-15	-3.45653	2.87165e-05	-1.61074	0.127659	-1.16961	2.82805e-07	-1.86447	0.446811	-1.08043	0.869405	-1.0168	2.67775e-05	-1.61436	0.0490625	1.22688	0.0309358	-1.25278	0.308524	-1.10944	0.774814	1.02942	0.426874	1.08418	0.414916	1.08648	0.00291409	1.37673	0.01539	1.2906	0.000857332	-1.50452	0.209586	-1.15521	0.000119319	-1.53772	0.852641	1.019	0.120918	1.19641
ENSMUST00000162554 // Mm.253446 // bone marrow| brain| connective tissue| embryonic tis	ENSMUST00000162554 // Ttc26 // tetratricopeptide repeat domain 26 // 6 B1|6 // 264134 /	ENSMUST00000162554	Ttc26	383.684	551.853	0.695265	8.6656e-19	-3.44859	1.34771e-11	-2.06681	0.0023307	-1.28536	0.736426	-1.02647	0.0296238	1.19006	0.312172	1.0821	0.842676	-1.01552	0.00930947	1.23473	0.750723	-1.02496	0.0265748	1.19438	2.30873e-05	-1.44821	0.000526013	-1.33813	0.00139227	-1.30375	0.864253	1.01335	0.0319587	1.18701	0.111821	-1.15127	0.658998	-1.03926	0.402549	-1.06739	0.00388599	1.26692	0.109056	1.15258
ENSMUST00000039118 // Mm.390761 // brain| embryonic tissue| eye| testis| organogenesis|	ENSMUST00000039118 // Zic5 // zinc finger protein of the cerebellum 5 // 14 E5|14 // 65	ENSMUST00000039118	Zic5	141.822	181.185	0.782747	1.67934e-11	-3.43469	5.30434e-12	-3.62035	0.00126812	-1.58218	7.24168e-06	-1.97989	0.0213471	-1.37256	0.0524351	-1.30232	1.81956e-07	-2.30578	0.001977	-1.54954	0.00751899	-1.45105	0.113419	-1.2384	3.39174e-07	2.24721	4.57415e-13	4.06244	3.45684e-06	2.04166	6.92237e-10	2.91466	0.97556	-1.00408	0.978229	-1.00408	0.429463	1.12575	0.0555175	1.29773	0.272261	1.1584	0.0211022	1.42839
NM_001039472 // Mm.276135 // blood| bone marrow| brain| embryonic tissue| extraembryoni	NM_001039472 // Kif21b // kinesin family member 21B // 1 E4|1 76.0 cM // 16565 /// ENSM	NM_001039472	Kif21b	133.543	110.97	1.20342	2.45822e-14	-3.43218	9.36345e-11	-2.51708	3.03322e-06	-1.77492	4.76943e-06	1.74854	1.28585e-09	2.29841	5.7668e-05	1.60841	0.0502764	-1.23713	0.537942	1.06765	0.00740505	-1.34666	0.000245476	-1.5299	2.71264e-09	2.24075	5.29939e-11	2.56831	0.39042	1.0958	0.50403	-1.07362	0.00975699	-1.33145	1.8944e-05	1.77933	7.98985e-07	2.00192	0.8287	1.02321	0.141314	-1.17134	0.300322	-1.13229
NM_175214 // Mm.446094 // brain| embryonic tissue| eye| mammary gland| oviduct| testis|	NM_175214 // Kif27 // kinesin family member 27 // 13 B1|13 // 75050 /// ENSMUST00000043	NM_175214	Kif27	42.0996	23.9925	1.7547	2.51296e-16	-3.4236	1.83329e-15	-3.17889	1.95874e-09	-2.02506	1.99246e-18	-4.15567	9.46575e-16	-3.25722	9.5575e-07	-1.6953	0.0176065	1.25268	9.56052e-06	1.58749	1.48798e-12	2.52504	3.84715e-17	3.68231	0.882931	-1.01356	0.41202	-1.07827	0.105655	-1.16246	0.911785	-1.01019	0.883171	-1.01353	0.111019	-1.18117	0.424031	-1.086	0.0275596	-1.23127	0.394465	1.08139	0.42635	1.08555
ENSMUST00000108107 // Mm.330986 // adrenal gland| bone| brain| embryonic tissue| eye| i	ENSMUST00000108107 // Spry1 // sprouty homolog 1 (Drosophila) // 3 B|3 // 24063 /// NM_	ENSMUST00000108107	Spry1	494.941	528.394	0.936689	7.62764e-15	-3.39522	6.1155e-16	-3.75908	6.41133e-13	-2.87172	0.227894	1.13105	0.000379573	1.47855	0.000674551	1.44973	8.08681e-06	-1.67618	0.000445843	-1.47048	5.63874e-06	-1.69544	3.19864e-08	-1.99557	1.71619e-15	3.6036	2.26273e-16	3.91851	4.9137e-08	1.96861	4.22745e-07	1.83953	0.516238	-1.06807	3.72688e-08	2.16169	1.8129e-05	1.73581	0.00129078	1.41718	0.825251	-1.0226	0.308557	1.12359
ENSMUST00000110109 // Mm.38009 // bladder| brain| embryonic tissue| eye| fertilized ovu	ENSMUST00000110109 // Plcb4 // phospholipase C, beta 4 // 2 F3|2 77.0 cM // 18798 /// N	ENSMUST00000110109	Plcb4	211.107	350.187	0.602842	2.68844e-20	-3.38927	5.57159e-20	-3.30447	2.22388e-07	-1.53772	9.02048e-05	-1.34977	0.00520671	-1.22549	0.438559	-1.05523	8.33191e-09	-1.65109	5.1091e-07	-1.51049	0.000202578	-1.32533	0.017448	-1.18594	0.00155676	-1.26327	0.0209483	-1.17974	0.507317	1.04704	0.903471	-1.00842	0.189741	1.09601	0.000143182	-1.38448	0.690054	1.03149	0.147535	1.10683	1.83916e-05	1.39804	0.0036394	1.26976
NM_198622 // Mm.33796 // adipose tissue| blood| brain| embryonic tissue| eye| inner ear	NM_198622 // H1fx // H1 histone family, member X // 6 D1|6 // 243529 /// ENSMUST0000005	NM_198622	H1fx	205.186	573.898	0.357531	6.01394e-16	-3.37278	7.39456e-10	-2.10719	0.00048027	-1.42119	0.316229	-1.09818	0.000480589	1.42116	0.0021366	1.35443	0.72403	-1.03335	0.00545175	1.31187	0.118315	1.15872	0.052555	1.20254	5.90175e-05	1.51509	0.019216	1.25271	0.000887258	1.39382	0.740228	1.03128	0.764138	1.02826	0.141331	1.16836	0.131906	1.17292	0.929344	1.00827	0.289971	-1.10401	0.729681	-1.03673
NM_010441 // Mm.157190 // bone marrow| brain| connective tissue| dorsal root ganglion|	NM_010441 // Hmga2 // high mobility group AT-hook 2 // 10 D2|10 67.5 cM // 15364 /// EN	NM_010441	Hmga2	854.978	220.035	3.88564	4.54989e-14	-3.35543	4.77164e-07	-1.88856	0.11529	-1.18527	0.0505795	-1.23722	0.563911	-1.06334	0.237155	1.13506	0.0346114	-1.2599	0.0195522	-1.29301	0.904416	1.01284	0.0263843	-1.27577	0.420054	-1.0898	0.140216	-1.17219	8.47031e-06	-1.71712	2.0534e-09	-2.26521	0.00105582	-1.45273	1.08218e-08	-2.35285	0.00453368	-1.42927	1.1829e-11	-2.7151	5.97577e-08	-2.02284	0.604027	-1.06395
NM_153804 // Mm.291854 // bone marrow| brain| embryonic tissue| extraembryonic tissue|	NM_153804 // Plekhg3 // pleckstrin homology domain containing, family G (with RhoGef do	NM_153804	Plekhg3	864.795	217.357	3.97869	9.39922e-17	-3.35395	3.79606e-07	-1.69655	0.445511	-1.0691	0.013492	1.25154	0.167854	1.12956	0.173675	1.12766	0.13701	-1.14068	0.0179703	-1.23885	0.766516	1.02626	0.0779488	-1.16994	4.43129e-14	2.70608	7.11478e-05	1.46997	3.68884e-09	1.92604	0.268596	-1.10219	0.000279528	-1.41367	0.00707401	1.31911	0.00898921	1.30718	0.693191	-1.03506	0.0381517	-1.20448	0.00231464	-1.37379
NM_008816 // Mm.343951 // blood| bone| bone marrow| brain| dorsal root ganglion| embryo	NM_008816 // Pecam1 // platelet/endothelial cell adhesion molecule 1 // 11 E1|11 // 186	NM_008816	Pecam1	333.606	519.277	0.642444	8.12002e-12	-3.34061	7.11668e-09	-2.51904	0.0339673	-1.31818	3.53495e-05	1.7984	0.00130584	1.54569	0.785489	1.03505	2.85855e-08	2.38312	8.40051e-07	2.08581	2.17489e-10	2.90438	5.48099e-11	3.07745	0.00302686	1.48808	0.151142	1.20207	0.792425	1.03387	0.0257554	-1.33833	0.624107	1.06406	0.000319383	1.74655	0.0334648	1.36524	0.365265	1.12203	0.0610363	-1.27438	0.909089	-1.01636
NM_001081191 // Mm.390484 // adrenal gland| brain| embryonic tissue| eye| inner ear| li	NM_001081191 // Eml5 // echinoderm microtubule associated protein like 5 // 12 E|12 //	NM_001081191	Eml5	178.538	198.141	0.90107	1.39603e-15	-3.32769	4.39284e-09	-2.01959	0.0253873	-1.24326	2.81264e-06	-1.66927	0.00154219	-1.37573	0.927726	-1.00859	0.00942005	-1.29155	0.564678	-1.05591	0.615419	-1.04857	0.307715	-1.10165	0.238268	1.11871	0.709416	-1.03578	0.170827	-1.13961	0.00111398	-1.39059	0.337042	1.09531	0.0124963	1.31735	2.83923e-05	1.64672	0.370533	-1.08856	0.360841	1.09047	0.801995	-1.02693
NM_009465 // Mm.4128 // adipose tissue| bladder| blood| bone| bone marrow| brain| conne	NM_009465 // Axl // AXL receptor tyrosine kinase // 7 A3-B1|7 6.0 cM // 26362 /// ENSMU	NM_009465	Axl	291.74	202.164	1.44309	8.4423e-06	-3.32633	0.000148238	-2.68011	0.0201474	-1.76507	0.407808	-1.21683	0.636713	1.11811	0.81007	1.05839	0.099151	1.48612	0.0192748	1.77276	0.176907	1.38061	0.0123743	1.84991	0.0138563	-1.83018	0.0345547	-1.67138	0.000317629	-2.52549	1.39327e-05	-3.20492	0.0758896	-1.53367	0.216938	-1.39196	0.987993	1.004	0.238898	-1.32379	0.248388	-1.31628	0.834483	-1.057
NM_019413 // Mm.310772 // adrenal gland| bladder| bone marrow| brain| embryonic tissue|	NM_019413 // Robo1 // roundabout homolog 1 (Drosophila) // 16 C3.1|16 // 19876 /// ENSM	NM_019413	Robo1	147.23	384.441	0.382972	3.43518e-12	-3.32484	1.5413e-08	-2.36905	0.0755773	-1.24811	0.305403	-1.13438	0.244853	1.15413	0.951598	1.00744	4.98989e-05	-1.73915	0.00271378	-1.47516	0.00223826	-1.48773	0.000254046	-1.63012	1.44694e-07	-2.1746	0.000737477	-1.56016	3.28756e-07	-2.10783	0.000661415	-1.56727	0.721561	-1.04454	0.545072	-1.08684	0.532491	-1.08971	0.680369	-1.05168	0.469072	-1.09282	0.760475	-1.04277
NR_027652 // Mm.289645 // adrenal gland| bladder| bone marrow| brain| connective tissue	NR_027652 // Meg3 // maternally expressed 3 // 12 F1|12 54.0 cM // 17263 /// NR_046475	NR_027652	Meg3	414.991	388.707	1.06762	1.25993e-09	-3.30747	1.66818e-09	-3.26229	0.000693259	-1.74626	0.199644	1.2182	0.0292894	-1.40822	0.0132686	1.48073	0.218551	1.20826	0.106997	-1.28351	0.0191966	1.44712	0.55631	-1.09393	0.634492	-1.07518	0.0693912	-1.32642	0.596569	1.08409	0.0541911	-1.35028	0.374905	1.14544	0.0151273	1.54033	0.000538179	1.89863	0.0288762	1.40954	0.0159116	1.46424	0.535846	-1.11202
ENSMUST00000069926 // Mm.101707 // brain| embryonic tissue| eye| heart| lung| prostate|	ENSMUST00000069926 // Slitrk4 // SLIT and NTRK-like family, member 4 // X|X A5 // 24544	ENSMUST00000069926	Slitrk4	87.2837	32.6072	2.67682	6.07813e-10	-3.30653	1.5157e-07	-2.55348	0.20016	1.21088	1.71727e-05	-2.05333	0.00674334	-1.52224	0.0181003	-1.43665	7.89545e-06	2.12888	4.62846e-08	2.69705	4.32551e-10	3.36109	4.00017e-12	4.243	0.00297085	1.59257	0.00400444	1.56698	0.0005608	1.73633	0.00051127	1.74439	0.347008	-1.15001	0.970248	1.00621	0.40011	1.15069	0.734089	1.05152	0.170098	1.22781	0.276334	-1.1998
NM_021280 // Mm.44463 // bone marrow| brain| embryonic tissue| extraembryonic tissue| e	NM_021280 // Plcg1 // phospholipase C, gamma 1 // 2 H2|2 92.0 cM // 18803 /// ENSMUST00	NM_021280	Plcg1	814.236	735.188	1.10752	2.25984e-17	-3.30543	1.78813e-11	-2.14841	0.000242374	-1.39294	0.102787	1.14686	0.000445448	1.36976	0.00274713	1.29989	6.348e-07	-1.62725	8.75167e-05	-1.4318	2.04519e-05	-1.48782	1.05048e-05	-1.51385	0.568809	1.04826	0.00138351	1.32642	0.55736	-1.04974	0.76384	-1.02513	0.863529	1.01429	0.0301651	1.23042	3.04322e-05	1.54454	0.722446	1.02978	0.585534	1.04613	0.464091	-1.07052
ENSMUST00000028780 // Mm.35083 // bone| brain| embryonic tissue| eye| heart| kidney| lu	ENSMUST00000028780 // Chac1 // ChaC, cation transport regulator 1 // 2 E5|2 // 69065 //	ENSMUST00000028780	Chac1	80.4142	683.43	0.117663	4.83722e-06	-3.30031	0.000397069	-2.394	0.0224385	-1.7084	0.964642	-1.0101	0.0064537	1.91258	0.000416883	2.38513	0.000385724	-2.39929	6.98035e-05	-2.7249	0.000368558	-2.40761	0.627941	1.11633	1.20001e-06	3.64175	3.06127e-07	4.00959	0.58913	1.13053	0.0754036	1.5091	0.505622	-1.16341	1.98793e-05	3.41597	4.46605e-05	3.19911	0.443021	1.19075	0.18838	1.35203	0.889328	-1.03609
NM_181401 // Mm.394111 // adrenal gland| bladder| blood| bone| bone marrow| brain| embr	NM_181401 // Tmem64 // transmembrane protein 64 // 4 A2|4 // 100201 /// ENSMUST00000062	NM_181401	Tmem64	2246.79	2134.82	1.05245	2.32905e-21	-3.29777	1.38776e-15	-2.23452	0.000271149	-1.28494	0.0614362	-1.12818	0.791077	1.01684	0.917379	-1.00656	5.66474e-07	-1.45354	0.00114727	-1.24585	0.0167523	-1.16945	0.046586	-1.13737	0.493421	1.04425	0.093025	-1.11386	2.03719e-07	1.48295	0.0610573	1.12839	0.784595	1.01739	2.12008e-06	-1.47872	0.000318965	-1.32032	0.295687	-1.06863	0.237179	-1.07808	0.902259	-1.00874
ENSMUST00000064462 // Mm.309917 // brain| juvenile /// NM_001024702 // Mm.309917 // bra	ENSMUST00000064462 // C1ql4 // complement component 1, q subcomponent-like 4 // 15 F1|1	ENSMUST00000064462	C1ql4	34.2153	28.0479	1.21989	1.01028e-05	-3.2938	0.0203256	-1.76648	0.182303	1.37629	0.0789201	-1.52863	0.384851	-1.22964	0.81837	-1.05589	0.754435	-1.07691	0.0248552	1.73138	0.0511897	1.6051	0.132662	1.4351	0.984846	1.00451	0.254779	-1.31241	0.0454073	1.62613	0.758013	1.07571	0.115308	1.46061	0.825453	-1.06043	0.25458	1.35744	0.976079	1.00712	0.324897	1.26429	0.889153	-1.03777
NM_007706 // Mm.474283 // brain| embryonic tissue| eye| inner ear| kidney| mammary glan	NM_007706 // Socs2 // suppressor of cytokine signaling 2 // 10 C2|10 52.0 cM // 216233	NM_007706	Socs2	93.9121	141.649	0.66299	3.58959e-14	-3.2764	1.09315e-13	-3.13842	1.83045e-12	-2.8251	0.0532303	-1.22705	0.691994	1.04181	0.401995	1.09086	8.88898e-07	-1.81936	0.000709994	-1.45846	0.000918526	-1.44518	0.000150897	-1.53857	8.46586e-06	-1.69198	0.00328903	-1.37911	0.466698	1.07836	0.0219701	1.27752	0.0930457	1.19329	0.12914	-1.19577	0.0691169	-1.24056	0.00299046	1.38407	0.0180947	1.28823	0.496366	1.08241
NM_172994 // Mm.41694 // brain| embryonic tissue| extraembryonic tissue| eye| inner ear	NM_172994 // Ppp2r2c // protein phosphatase 2 (formerly 2A), regulatory subunit B (PR 5	NM_172994	Ppp2r2c	661.916	79.0986	8.36824	1.00946e-14	-3.25767	1.72039e-09	-2.14906	0.15371	-1.15325	1.57461e-12	-2.70986	8.41825e-06	-1.65256	0.0728666	-1.19802	7.99365e-06	-1.65521	0.00164436	-1.39309	0.0592309	-1.20978	0.0309742	-1.24529	5.62979e-05	-1.55724	0.00480981	-1.34051	4.33782e-12	-2.61651	1.06603e-11	-2.53756	5.57225e-07	-1.79638	0.00285641	-1.41987	0.140341	-1.18027	2.52978e-09	-2.12301	2.0606e-08	-1.98821	0.000124834	-1.59858
NM_026887 // Mm.426783 // bladder| bone marrow| brain| dorsal root ganglion| embryonic	NM_026887 // Ap1s2 // adaptor-related protein complex 1, sigma 2 subunit // X F5|X // 1	NM_026887	Ap1s2	209.112	162.364	1.28792	5.08681e-14	-3.25547	1.09385e-07	-1.95391	0.409646	-1.08988	0.131887	1.17224	0.00280539	1.39017	0.169206	1.15562	0.105996	-1.18634	0.293504	-1.11623	0.0276081	-1.26658	0.0471795	-1.2357	0.0375024	1.24907	0.102027	1.18877	2.52059e-05	1.63778	0.00854547	1.33111	0.816315	1.02444	0.0197144	-1.32599	0.0483813	-1.26675	0.85726	1.01887	0.371071	-1.09795	0.643824	1.05555
---	AK145614 // Gm807 // predicted gene 807 // 13 D1|13 // 328320	AK145614	Gm807	136.625	67.1395	2.03495	1.08022e-14	-3.25534	6.78931e-11	-2.38875	0.0197007	-1.26964	0.0361842	-1.23735	0.951568	-1.00602	0.562653	1.05899	4.34888e-07	-1.81178	0.00033237	-1.47147	9.66135e-06	-1.64683	0.00169289	-1.39241	0.0219781	1.26392	0.156642	1.15231	0.130715	-1.16362	0.367691	-1.09358	0.98414	-1.00197	1.29305e-05	1.73384	0.0132788	1.33129	0.857168	1.01794	0.354982	-1.09624	0.185159	-1.1604
NM_134000 // Mm.436686 // bladder| blood| bone marrow| brain| dorsal root ganglion| emb	NM_134000 // Traf3ip2 // TRAF3 interacting protein 2 // 10 B1|10 // 103213 /// ENSMUST0	NM_134000	Traf3ip2	257.059	124.91	2.05795	1.99332e-16	-3.25219	2.28513e-12	-2.38238	0.0093807	-1.26658	0.192774	1.12142	0.101801	1.15591	0.449053	1.06835	0.0598385	1.18246	0.0497182	1.19139	0.375828	1.08054	0.0234773	1.22617	0.0993942	-1.15714	0.000270783	-1.41366	5.23212e-11	-2.16976	1.22616e-09	-1.98266	0.0154612	-1.2448	0.00974475	1.30222	0.315381	1.10386	4.15209e-05	-1.49071	0.00296284	-1.31536	0.0127563	-1.2887
NM_028030 // Mm.29148 // adrenal gland| bladder| bone| bone marrow| brain| embryonic ti	NM_028030 // Rbpms2 // RNA binding protein with multiple splicing 2 // 9 C|9 // 71973 /	NM_028030	Rbpms2	1264.82	2857.43	0.442644	4.40899e-21	-3.25189	5.78502e-14	-2.0489	1.08752e-05	-1.37427	0.0109726	-1.18333	0.994185	-1.00046	0.0996935	1.11214	2.85252e-12	-1.87348	4.36936e-09	-1.60488	7.52501e-09	-1.5874	2.9238e-11	-1.78073	0.540806	-1.03965	0.793199	-1.01677	0.788432	1.01717	0.577561	-1.03603	0.836407	-1.01319	0.00044372	1.31224	0.00154858	1.27259	4.03072e-05	1.33858	0.00527544	1.20472	0.491776	-1.05037
NM_145466 // Mm.379358 // blood| brain| embryonic tissue| eye| intestine| kidney| liver	NM_145466 // A2ld1 // AIG2-like domain 1 // 14 E5|14 // 223267 /// ENSMUST00000038075 /	NM_145466	A2ld1	113.248	231.377	0.489454	1.28316e-18	-3.24554	9.30721e-13	-2.15561	0.643314	-1.03521	0.000462816	-1.32769	0.0101544	-1.22178	0.0376306	-1.17299	0.18626	-1.10489	0.688836	1.03036	0.130626	-1.12129	0.977544	-1.0021	6.51785e-08	-1.63715	0.0129389	-1.21303	0.000472124	-1.32703	0.430324	-1.06086	0.579627	1.04228	0.834668	1.01766	0.175859	-1.1217	0.0238639	1.19042	0.648917	-1.0346	0.888073	-1.01187
NM_145395 // Mm.247121 // intestine| lung| mammary gland| thymus| neonate| juvenile| ad	NM_145395 // Duoxa1 // dual oxidase maturation factor 1 // 2 E5|2 // 213696 /// ENSMUST	NM_145395	Duoxa1	75.4614	25.1105	3.00517	6.46338e-14	-3.23245	2.60895e-13	-3.06365	0.139472	-1.16891	3.73496e-08	-2.026	0.000440582	-1.48776	0.197674	-1.14521	0.00872663	-1.3307	0.00195635	-1.40996	0.587383	1.05824	0.746765	-1.03422	0.314178	-1.11126	0.108048	-1.18551	0.406073	-1.09078	0.0422824	-1.24262	0.738763	-1.03536	0.167345	-1.1777	0.665692	-1.05191	0.858138	-1.01879	0.783049	1.0291	0.435469	1.09593
NM_029999 // Mm.154109 // brain| embryonic tissue| eye| heart| intestine| kidney| lung|	NM_029999 // Lbh // limb-bud and heart // 17 E2|17 // 77889 /// ENSMUST00000024857 // L	NM_029999	Lbh	134.747	53.7432	2.50723	4.86449e-08	-3.22694	1.70672e-09	-3.88469	1.35053e-06	-2.69291	0.0419224	1.44132	0.0257324	1.49628	0.331129	1.18652	1.48342e-05	-2.3622	0.000515487	-1.931	0.00023645	-2.02113	1.70737e-06	-2.65879	0.463233	1.1374	0.696349	1.07071	0.693858	-1.07135	0.00758638	-1.63133	0.00413922	-1.69798	0.379952	1.18935	0.768784	1.05951	0.672937	1.07672	0.0261607	-1.49444	0.0331438	-1.53922
NM_182991 // Mm.23002 // brain| embryonic tissue| eye| heart| pineal gland| pituitary g	NM_182991 // Tmem59l // transmembrane protein 59-like // 8 B3.3|8 // 67937 /// ENSMUST0	NM_182991	Tmem59l	484.981	118.123	4.10572	1.69023e-07	-3.22439	8.98476e-05	-2.23722	0.103228	-1.36016	0.00310128	-1.78848	0.538068	-1.12134	0.786193	1.05164	0.204853	-1.26835	0.696227	1.07521	0.339706	1.19507	0.682028	1.07907	0.0762208	-1.39906	0.218378	1.25941	2.50619e-05	-2.41362	0.0389481	-1.4828	0.757747	-1.05894	0.146553	1.35915	0.253885	1.27111	0.117306	-1.3435	0.0215363	-1.55502	0.584996	-1.12083
NM_182927 // Mm.377262 // blood| brain| dorsal root ganglion| embryonic tissue| eye| in	NM_182927 // Spred3 // sprouty-related, EVH1 domain containing 3 // 7 B1|7 // 101809 //	NM_182927	Spred3	213.336	77.3983	2.75634	1.17873e-10	-3.22358	2.96475e-09	-2.79617	0.000171098	-1.75081	0.538221	1.08728	0.937631	1.01067	0.595172	-1.07486	0.491001	-1.09822	0.03006	-1.35445	0.903366	-1.0166	0.204665	-1.18984	0.249268	-1.1707	0.442026	-1.11033	0.0725381	-1.28237	0.00200721	-1.56241	0.00496617	-1.49379	0.0570689	-1.34566	0.674816	-1.0661	0.103978	-1.25148	0.0803717	-1.27368	0.12459	-1.26826
AK136676 // Mm.99385 // epididymis| mammary gland| adult /// XR_107526 // Mm.99385 // e	AK136676 // Gm10685 // predicted gene 10685 // 3 F2.1|3 // 100038359 /// XR_107526 // G	AK136676	Gm10685	38.5543	29.1594	1.32219	6.2793e-12	-3.21582	5.33965e-11	-2.94362	6.33009e-09	-2.4375	0.0282679	1.31623	0.980395	-1.00299	0.319468	1.12932	0.00434459	-1.44086	0.00035278	-1.60346	0.496211	-1.08637	0.0112707	-1.3783	0.397162	1.10877	0.518315	1.08179	0.854512	1.02251	0.466677	-1.0927	0.912941	-1.01336	0.131781	1.23196	0.0289312	1.35984	0.746882	1.03998	0.67063	1.05304	0.457522	-1.10704
AB063319 // Mm.293263 // brain| connective tissue| embryonic tissue| extraembryonic tis	NR_046304 // LOC100861570 // Im snoRNA 1 // --- // 100861570 /// AB063319 // Rian // RN	NR_046304	LOC100861570	246.878	388.546	0.635389	4.184e-15	-3.21422	4.71764e-14	-2.9425	6.96362e-05	-1.52071	0.00905376	-1.29529	0.00104559	-1.39606	0.148919	1.14876	0.238822	1.11926	0.924735	1.009	0.0027084	1.35212	0.150268	-1.14822	5.30716e-10	-2.16252	1.3932e-10	-2.25437	0.992338	1.00091	0.0593447	-1.20074	0.164449	1.14277	0.0327005	-1.2641	0.146061	-1.16995	9.15216e-05	1.50803	0.000717578	1.41334	0.951785	1.00646
NM_032007 // Mm.379271 // --- /// ENSMUST00000047888 // Mm.379271 // ---	NM_032007 // Mmp1b // matrix metallopeptidase 1b (interstitial collagenase) // 9 A1|9 /	NM_032007	Mmp1b	25.3504	22.6317	1.12013	1.33697e-12	-3.20964	1.18575e-11	-2.94148	3.6743e-10	-2.57849	0.974101	-1.00373	0.622359	-1.05822	0.310226	1.12434	0.750636	1.03716	0.73494	-1.03963	0.0371737	1.27883	0.567426	1.06795	0.601636	-1.06183	0.27481	1.13457	0.318365	1.12211	0.352607	1.1132	0.358766	-1.11167	0.43721	-1.10577	0.458509	-1.10065	0.509145	1.07891	0.324954	-1.12035	0.419153	-1.11025
NM_011607 // Mm.454219 // bladder| bone| brain| connective tissue| embryonic tissue| ey	NM_011607 // Tnc // tenascin C // 4 C1|4 32.2 cM // 21923 /// ENSMUST00000030056 // Tnc	NM_011607	Tnc	121.953	69.3335	1.75894	0.00133221	-3.20167	0.00150144	-3.15639	0.011915	-2.43003	0.0815853	-1.82523	0.38711	-1.3423	0.940062	-1.0258	0.229972	-1.5075	0.88898	1.04843	0.740572	1.11877	0.295571	1.4288	0.453012	1.29061	0.090707	1.79286	0.580555	-1.20628	0.908651	-1.03963	0.110028	-1.73394	0.964508	-1.01708	0.153499	1.73408	0.860084	1.06154	0.191758	1.56378	0.934918	-1.03157
NM_001134457 // Mm.490489 // bladder| bone marrow| brain| embryonic tissue| extraembryo	NM_001134457 // Fam55c // family with sequence similarity 55, member C // 16 C1.1|16 //	NM_001134457	Fam55c	433.965	133.957	3.23958	5.15273e-13	-3.20139	0.000203616	-1.56997	0.773137	-1.03246	0.00280094	-1.42068	0.16634	-1.16791	0.605371	-1.059	2.66162e-08	-2.14426	0.000416494	-1.52908	0.00113986	-1.47186	0.0469129	-1.25337	0.283072	1.12725	0.791872	1.02967	0.0946313	-1.20747	7.82276e-05	-1.62518	0.195721	-1.15589	0.000474785	1.60266	0.000180009	1.66839	0.37034	1.10488	0.548434	-1.06889	0.099756	-1.23182
NM_027872 // Mm.153218 // bladder| bone marrow| brain| embryonic tissue| eye| inner ear	NM_027872 // Slc46a3 // solute carrier family 46, member 3 // 5 G3|5 // 71706 /// ENSMU	NM_027872	Slc46a3	72.7498	104.85	0.693848	2.7955e-10	-3.1977	2.08172e-08	-2.63795	6.87497e-06	-2.0507	0.0026054	1.56083	5.77799e-05	1.8669	0.00231793	1.57003	0.561966	-1.08431	0.937369	1.011	0.363148	-1.1358	0.197319	1.19903	2.4522e-08	2.6191	9.789e-08	2.46579	0.00121103	-1.62114	0.000287268	-1.73559	0.102138	-1.26069	1.40084e-12	4.89497	3.35586e-13	5.30369	0.0199539	1.39912	0.00536108	1.50402	0.807906	-1.0388
---	NR_029744 // Mir29a // microRNA 29a // 6|6 // 387222	NR_029744	Mir29a	52.5048	29.3826	1.78693	1.47964e-08	-3.19699	1.5229e-08	-3.19222	1.16116e-06	-2.55622	0.00433437	-1.63994	3.53606e-05	-2.1435	0.602983	1.0894	0.0397891	1.4153	0.986629	1.00276	2.88496e-05	2.16644	0.124522	1.2922	0.581089	1.09512	0.686279	-1.06871	0.868749	-1.02753	0.00625084	-1.60325	0.502282	-1.11693	0.459481	1.14692	0.944909	1.01284	0.978387	1.00446	0.0169355	-1.50294	0.499104	-1.13335
NM_019737 // Mm.393827 // bone| bone marrow| brain| embryonic tissue| eye| fertilized o	NM_019737 // B4galt6 // UDP-Gal:betaGlcNAc beta 1,4-galactosyltransferase, polypeptide	NM_019737	B4galt6	2818.78	2083.22	1.35309	7.48773e-23	-3.19579	2.6627e-20	-2.67549	0.00151179	-1.20798	0.867314	-1.00935	0.193176	1.07607	0.318977	1.05748	0.247068	1.06723	0.0791578	1.10496	0.122012	1.09147	0.282221	1.06223	2.188e-14	1.9168	2.62411e-11	1.66359	0.312699	1.05826	0.0401698	-1.12472	0.0122008	-1.15666	1.22178e-06	1.42842	1.57182e-05	1.35876	0.00142704	-1.20935	1.5967e-05	-1.31333	0.122657	-1.10315
NM_023051 // Mm.38993 // bone| bone marrow| brain| connective tissue| embryonic tissue|	NM_023051 // Clstn1 // calsyntenin 1 // 4 E1|4 // 65945 /// ENSMUST00000039144 // Clstn	NM_023051	Clstn1	716.777	582.083	1.2314	9.95446e-20	-3.19485	3.01732e-10	-1.76556	0.274162	1.0782	0.810598	1.01651	0.0835986	1.1281	0.109193	1.11771	5.01671e-05	-1.36249	0.020479	-1.17821	0.131109	-1.11036	0.0158356	-1.18678	0.000136396	1.3327	0.127646	1.11145	0.31773	1.07112	0.00317775	-1.23794	0.0423016	-1.15317	0.00010544	1.38979	0.0752092	1.14961	0.447082	1.05352	0.0011507	-1.26896	0.0119923	-1.22264
NM_013871 // Mm.38343 // bladder| bone marrow| brain| embryonic tissue| extraembryonic	NM_013871 // Mapk12 // mitogen-activated protein kinase 12 // 15 E3|15 // 29857 /// ENS	NM_013871	Mapk12	703.528	568.832	1.23679	1.95921e-12	-3.19243	1.81705e-10	-2.67056	1.53966e-05	-1.76372	0.83572	1.0243	0.242535	1.14621	0.27625	1.13539	0.00240346	-1.45254	0.00399244	-1.42173	0.0411381	-1.2749	0.0553523	-1.255	2.59734e-12	3.15602	7.59401e-13	3.31925	0.235526	-1.1486	0.0727682	-1.23622	6.13603e-06	-1.82371	8.80551e-12	3.4426	1.04702e-10	3.08772	0.8582	-1.0209	0.0335104	-1.28842	7.86665e-05	-1.76813
NM_194269 // Mm.45208 // brain| connective tissue| embryonic tissue| kidney| lung| lymp	NM_194269 // Morn2 // MORN repeat containing 2 // 17 E3|17 // 378462 /// ENSMUST0000006	NM_194269	Morn2	405.982	489.02	0.830194	4.62243e-13	-3.18859	2.16839e-08	-2.14776	0.175301	-1.1628	0.615726	-1.05684	0.103892	1.19954	0.0496336	1.24779	0.0271608	-1.28508	0.195806	1.15466	0.985917	-1.00194	0.985249	-1.00204	0.275178	-1.12854	0.47786	-1.08145	0.53913	1.07004	0.00173503	1.44415	0.123706	1.18757	0.0562814	-1.2732	0.162495	-1.19098	0.695897	1.04396	0.00175955	1.44336	0.0352223	1.30714
NM_172814 // Mm.39874 // bladder| bone| bone marrow| brain| connective tissue| embryoni	NM_172814 // Lrp12 // low density lipoprotein-related protein 12 // 15 B3.1|15 // 23939	NM_172814	Lrp12	227.249	161.048	1.41106	9.29062e-08	-3.18332	8.44484e-07	-2.81674	0.0765555	-1.38017	0.0214618	-1.52864	0.189738	-1.26665	0.173842	-1.27806	0.000264632	-2.03494	0.00229554	-1.78233	0.0965612	-1.352	0.00470704	-1.70069	0.0196353	1.5388	0.00322315	1.74367	0.279018	1.21462	0.62801	1.09035	0.851038	-1.03405	0.372018	-1.19688	0.754154	1.06477	0.161129	-1.28787	0.177147	-1.27562	0.517996	1.13862
---	NR_028433 // AF357355 // snoRNA AF357355 // 12 F1|12 // 100303646 /// AF357355 // AF357	NR_028433	AF357355	263.131	387.199	0.679576	3.43204e-09	-3.17089	1.96149e-07	-2.6097	0.00402917	-1.59221	0.301244	-1.17283	0.0145826	-1.47553	0.325691	1.16354	0.152515	1.24863	0.813406	-1.03682	0.277657	1.18239	0.142422	-1.25585	5.51912e-07	-2.48432	6.72871e-07	-2.46101	0.0564834	1.34867	0.147396	-1.25224	0.609904	1.08141	0.0406712	-1.43621	0.225947	-1.23412	3.76914e-05	2.0287	0.0387171	1.3848	0.721236	-1.06338
ENSMUST00000020283 // Mm.272870 // bone marrow| brain| connective tissue| dorsal root g	ENSMUST00000020283 // H2afy2 // H2A histone family, member Y2 // 10 B4|10 // 404634 ///	ENSMUST00000020283	H2afy2	103.716	131.995	0.78576	0.00010759	-3.16608	0.692856	-1.1123	0.575636	-1.16299	0.774923	-1.08006	0.855993	1.05008	0.675924	-1.11925	0.869221	1.04533	0.836296	-1.05722	0.0937326	-1.58329	0.573735	-1.16386	0.615604	-1.14497	0.226	1.38963	0.964435	-1.01208	0.0607614	1.67617	0.449379	1.22677	0.436714	-1.26639	0.385743	-1.30165	0.942771	1.01951	0.835352	1.05756	0.269693	1.40004
ENSMUST00000032909 // Mm.430730 // adipose tissue| adrenal gland| bladder| bone marrow|	ENSMUST00000032909 // Pde3b // phosphodiesterase 3B, cGMP-inhibited // 7 F1|7 53.3 cM /	ENSMUST00000032909	Pde3b	68.8708	143.066	0.481391	1.22207e-10	-3.16584	1.45693e-10	-3.1413	3.5674e-06	-2.04803	9.93985e-09	-2.6179	0.0074934	-1.45466	0.48452	-1.0983	0.0211837	1.37585	4.93852e-07	2.22355	2.19049e-06	2.09007	0.00364581	1.50836	5.35775e-06	2.01354	0.000499568	1.65612	0.0333443	1.34055	0.526347	-1.08865	0.161875	-1.20856	0.000274265	1.81673	2.07175e-05	2.05961	0.481296	1.09907	0.780127	1.03805	0.063452	-1.33001
NM_030261 // Mm.325126 // bone marrow| brain| embryonic tissue| epididymis| eye| intest	NM_030261 // Sesn3 // sestrin 3 // 9|9 A3 // 75747 /// ENSMUST00000034507 // Sesn3 // s	NM_030261	Sesn3	190.785	450.34	0.423647	5.29802e-14	-3.16491	4.6668e-10	-2.29506	0.483477	-1.07402	6.45425e-05	-1.57095	0.480065	-1.07462	0.504871	-1.07029	1.86049e-08	-2.03608	4.37577e-05	-1.59098	1.52591e-05	-1.64596	0.000609398	-1.45703	6.99885e-05	1.56679	1.55501e-05	1.64497	0.514444	1.06866	0.41763	-1.0862	0.0377152	-1.24249	0.0301659	1.29067	0.00138525	1.47777	0.387138	-1.09229	0.143497	-1.16263	0.124735	-1.19474
NM_024188 // Mm.13445 // adipose tissue| adrenal gland| bladder| blood| bone| bone marr	NM_024188 // Oxct1 // 3-oxoacid CoA transferase 1 // 15 A1|15 // 67041 /// ENSMUST00000	NM_024188	Oxct1	1124.06	366.17	3.06977	1.25178e-18	-3.14218	1.45032e-18	-3.12663	4.10414e-08	-1.63158	0.00273416	-1.25925	0.0669803	-1.14541	0.986777	-1.0012	5.19826e-05	-1.38745	0.000481367	-1.31585	0.00385987	-1.24778	0.00439849	-1.24341	3.06592e-11	1.93189	2.92439e-10	1.8296	3.69397e-06	1.47399	4.3351e-05	1.39331	0.170531	-1.10583	0.000547196	1.35646	0.0198294	1.21734	0.0563342	1.15224	0.66327	1.03211	0.933869	1.00678
ENSMUST00000072740 // Mm.258939 // blood| bone| bone marrow| brain| connective tissue|	ENSMUST00000072740 // Abr // active BCR-related gene // 11 B5|11 45.0 cM // 109934 ///	ENSMUST00000072740	Abr	466.298	294.375	1.58403	1.13398e-11	-3.13005	8.42574e-10	-2.63116	4.40993e-06	-1.89919	0.00202394	1.48915	0.000128268	1.66808	0.138966	1.19938	0.0145755	-1.36031	0.791735	1.03252	0.766898	-1.03658	0.331932	1.12552	5.21121e-06	1.88723	0.0385121	1.29406	0.000158932	1.65398	0.223068	1.1607	0.0196007	-1.34042	0.312214	-1.14851	0.804161	1.03434	0.00437116	-1.43939	0.168591	-1.18393	0.00676551	-1.47229
NM_023066 // Mm.222206 // bladder| bone| bone marrow| brain| connective tissue| dorsal	NM_023066 // Asph // aspartate-beta-hydroxylase // 4 A1|4 // 65973 /// NM_001177849 //	NM_023066	Asph	503.051	245.567	2.04853	5.18465e-19	-3.12275	4.96926e-16	-2.5238	1.77781e-10	-1.81659	0.183168	-1.09924	0.0445757	1.15595	0.193806	1.09672	8.08126e-14	-2.1945	6.587e-09	-1.67354	2.31507e-09	-1.7132	1.66658e-06	-1.48204	0.00781464	1.21632	0.00197319	1.26068	0.655159	-1.03192	0.350979	1.06813	0.575811	-1.04018	3.7592e-05	1.44019	0.000234211	1.37426	0.434326	1.05671	0.32356	1.07231	0.128731	-1.12949
NM_198616 // Mm.329657 // adipose tissue| bladder| bone marrow| brain| embryonic tissue	NM_198616 // Ccdc85b // coiled-coil domain containing 85B // 19 A|19 // 240514 /// NM_0	NM_198616	Ccdc85b	270.791	30.3184	8.9316	7.28128e-11	-3.12065	2.77109e-09	-2.67597	0.0475175	-1.30109	7.14781e-07	-2.13573	0.00020953	-1.69213	0.000555473	-1.62218	0.676425	-1.05558	0.0907749	-1.24991	0.151431	-1.20708	0.024442	-1.35135	0.0087233	-1.42651	0.00134449	-1.55941	0.0561832	-1.2881	0.266632	-1.156	0.273131	-1.1537	0.159736	1.23017	0.327736	-1.15401	0.889056	1.01823	0.300203	-1.1446	0.00463921	-1.54363
NM_010217 // Mm.390287 // bladder| bone| brain| connective tissue| embryonic tissue| ex	NM_010217 // Ctgf // connective tissue growth factor // 10 A3-B1|10 17.0 cM // 14219 //	NM_010217	Ctgf	175.18	377.69	0.46382	9.80099e-06	-3.11364	0.00343248	-2.00776	0.0201623	-1.71922	0.0319879	-1.64468	0.00547189	-1.93086	0.154786	-1.38342	0.624945	1.11653	0.806466	1.05672	0.209623	1.33022	0.932142	1.01936	0.604841	-1.12378	0.174876	-1.36221	0.558751	-1.14102	0.00768742	-1.87532	0.219639	-1.32188	0.364563	-1.25933	0.725122	-1.0931	0.38627	-1.21653	0.116699	-1.43172	0.367308	-1.25766
NM_198191 // Mm.78923 // brain| eye| mammary gland| spinal cord| testis| fetus| neonate	NM_198191 // Pip5kl1 // phosphatidylinositol-4-phosphate 5-kinase-like 1 // 2 B|2 // 22	NM_198191	Pip5kl1	100.794	83.1572	1.21209	1.08105e-10	-3.10794	7.76837e-09	-2.59276	0.000358158	-1.66318	0.0262812	-1.35058	0.269032	1.15707	0.0405878	1.31732	2.05657e-05	-1.87773	0.000784332	-1.6063	0.0155113	-1.39005	1.38759e-06	-2.09715	0.00261259	1.51962	0.00114291	1.57914	0.423737	1.11092	0.00773241	-1.44116	0.0436616	-1.31165	0.205599	1.20706	0.0173587	1.43803	0.545803	1.08252	0.0574871	-1.29005	0.649697	-1.06921
NM_176996 // Mm.29279 // bone| bone marrow| brain| embryonic tissue| extraembryonic tis	NM_176996 // Smo // smoothened homolog (Drosophila) // 6 A3.3|6 7.2 cM // 319757 /// EN	NM_176996	Smo	196.086	362.649	0.540705	1.28429e-15	-3.10528	4.26243e-07	-1.70508	0.00103222	-1.36655	1.55634e-05	-1.54364	0.00543794	-1.29587	0.0687545	-1.17915	3.90461e-14	2.75987	1.73185e-15	3.07242	9.16714e-15	2.89877	1.00336e-12	2.48371	0.00215458	1.3355	0.00241108	1.33073	0.364423	-1.08415	0.0244078	-1.22894	0.00118117	-1.36088	0.0953059	1.18425	0.0313815	1.24716	0.224096	-1.1149	0.0491508	-1.19576	0.0351569	-1.24099
ENSMUST00000114548 // Mm.234832 // bone| bone marrow| brain| dorsal root ganglion| embr	ENSMUST00000114548 // Cadm1 // cell adhesion molecule 1 // 9|9 B-C // 54725 /// ENSMUST	ENSMUST00000114548	Cadm1	398.299	188.939	2.10808	2.43847e-09	-3.10359	0.0125988	-1.46969	0.885264	-1.02161	0.789213	-1.04042	0.694313	1.06002	0.800373	1.03819	0.067602	-1.31883	0.171991	-1.22731	0.172724	-1.22687	0.295663	-1.16887	0.23932	-1.19233	0.0720368	1.31285	0.000197198	-1.83112	0.436212	-1.12278	0.441369	-1.12131	0.613504	1.08787	0.561507	1.10171	0.0135288	-1.46348	0.0321257	-1.38702	0.368434	-1.16243
NM_026361 // Mm.260938 // bladder| blood| bone marrow| brain| connective tissue| embryo	NM_026361 // Pkp4 // plakophilin 4 // 2|2 C3 // 227937 /// NM_175464 // Pkp4 // plakoph	NM_026361	Pkp4	908.559	675.41	1.3452	1.30738e-12	-3.10317	8.51635e-10	-2.43184	0.0201471	-1.30731	0.000997029	-1.4824	0.162207	-1.17067	0.479477	1.08217	0.000338936	-1.54421	0.0114394	-1.34124	0.397426	-1.09926	0.0128197	-1.33447	0.0422453	-1.26146	0.68203	1.04671	0.528435	1.07289	0.026941	1.28955	0.376216	-1.10407	4.66125e-05	-1.76691	0.366254	-1.12031	0.039202	-1.26619	0.262987	1.13385	0.585129	-1.07081
ENSMUST00000103234 // Mm.271644 // bladder| brain| dorsal root ganglion| embryonic tiss	ENSMUST00000103234 // Fbn1 // fibrillin 1 // 2 F|2 71.0 cM // 14118 /// NM_007993 // Fb	ENSMUST00000103234	Fbn1	47.3272	45.7246	1.03505	2.6353e-07	-3.09041	1.86908e-06	-2.76491	0.000775316	-1.93944	0.00557528	-1.7041	0.265958	-1.22755	0.704857	-1.07177	0.00347014	-1.76	0.0158451	-1.58125	0.0346607	-1.48827	0.0860839	-1.37697	0.832116	1.03953	0.167507	1.29109	0.795605	1.04852	0.31741	1.20199	0.138035	-1.31661	0.59206	1.11659	0.757109	1.06564	0.0288599	1.51018	0.124245	1.33028	0.929133	1.01844
NM_053155 // Mm.244078 // bone marrow| brain| embryonic tissue| epididymis| extraembryo	NM_053155 // Clmn // calmin // 12|12 F1 // 94040 /// ENSMUST00000109937 // Clmn // calm	NM_053155	Clmn	76.6612	181.735	0.421831	3.52933e-12	-3.07829	1.39358e-11	-2.91565	1.16237e-06	-1.92246	0.954926	1.00649	0.256044	1.14007	0.472046	1.08609	0.0138493	-1.3406	0.00343625	-1.42522	0.00326449	-1.42829	0.0910316	-1.21782	7.29174e-13	3.28114	7.90631e-12	2.98129	0.050755	1.25764	0.00429209	1.41189	0.947435	-1.00757	9.48245e-10	2.77927	1.79361e-07	2.24585	0.713592	-1.04294	0.703318	-1.0446	0.382655	-1.11944
NM_207668 // Mm.19941 // blood| connective tissue| embryonic tissue| fertilized ovum| i	NM_207668 // Acpp // acid phosphatase, prostate // 9 F1|9 // 56318 /// ENSMUST000000627	NM_207668	Acpp	1114.67	52.0051	21.4339	1.51457e-12	-3.07095	2.11349e-12	-3.03117	7.54768e-05	-1.628	2.11445e-08	2.16305	4.30794e-06	1.80009	0.011729	1.33814	0.0194362	-1.30803	0.000433354	-1.52742	0.000115972	-1.60307	9.82634e-06	-1.74929	6.23425e-07	1.92421	0.279651	-1.12836	2.72526e-05	1.68792	0.644924	-1.05249	0.429688	-1.09188	0.948133	1.00814	0.081118	1.24809	0.0105799	-1.34422	0.289337	1.12561	0.0415786	-1.29797
NM_001077406 // Mm.266341 // bladder| bone| bone marrow| brain| embryonic tissue| eye|	NM_001077406 // Nrp2 // neuropilin 2 // 1 C2|1 // 18187 /// NM_001077407 // Nrp2 // neu	NM_001077406	Nrp2	444.483	372.47	1.19334	2.0006e-09	-3.06107	2.96037e-05	-1.97702	0.653113	-1.0675	0.000104877	-1.86381	0.576321	1.08466	0.458444	1.11404	9.40767e-10	-3.17096	0.00270777	-1.58716	0.00660135	-1.51267	0.0680524	-1.31083	0.0322575	-1.37747	5.8951e-07	-2.36191	2.92067e-07	-2.43791	9.77722e-12	-3.95365	0.0567514	-1.32733	7.22352e-05	2.05293	0.344101	1.16789	0.611143	1.07672	0.00453533	-1.54409	0.0332722	-1.42993
ENSMUST00000068262 // Mm.354635 // brain /// NM_001085502 // Mm.354635 // brain /// BC1	ENSMUST00000068262 // Nt5c1a // 5'-nucleotidase, cytosolic IA // 4 D2.2|4 // 230718 ///	ENSMUST00000068262	Nt5c1a	52.6396	24.8504	2.11826	3.89949e-12	-3.06059	1.09155e-12	-3.22147	1.12647e-07	-2.08648	0.843113	1.02288	0.00534913	1.39789	0.128695	1.19273	0.00926006	-1.36467	0.139646	1.18674	0.742238	1.03833	0.246796	1.14283	0.246924	1.14279	0.26742	1.13627	0.644782	-1.05417	0.910421	1.01294	0.63775	-1.05536	0.959432	-1.00655	0.950344	-1.00803	0.457054	-1.08903	0.892655	-1.01554	0.676797	1.05504
NM_001204201 // Mm.288474 // adipose tissue| bladder| blood| bone| bone marrow| brain|	NM_001204201 // Spp1 // secreted phosphoprotein 1 // 5 E5|5 56.0 cM // 20750 /// NM_001	NM_001204201	Spp1	46.1752	1799.4	0.0256614	4.77389e-05	-3.05472	1.82392e-06	-3.93182	0.000268197	-2.66058	0.0673563	1.58333	0.167653	1.40966	0.859828	1.04437	0.699349	1.09967	0.395585	-1.23341	0.193584	-1.38134	0.834946	-1.05256	0.144683	1.43834	0.721566	1.09162	0.267577	1.3161	0.58631	1.1434	0.545802	1.16046	0.446467	1.23496	0.880052	1.04256	0.646189	1.11961	0.748705	1.08197	0.613848	1.14979
NM_133687 // Mm.94560 // bone marrow| brain| embryonic tissue| extraembryonic tissue| e	NM_133687 // Cxxc5 // CXXC finger 5 // 18|18 B3 // 67393 /// ENSMUST00000060722 // Cxxc	NM_133687	Cxxc5	582.013	667.975	0.871309	1.26215e-18	-3.05093	6.95074e-14	-2.21282	0.0199821	-1.18571	0.000307784	1.32061	0.00183177	1.26466	0.0725163	1.13837	2.97338e-05	-1.39336	1.28564e-05	-1.41973	0.0517136	-1.15132	0.00420303	-1.238	0.522109	1.04639	0.00203759	-1.26127	0.278133	1.08028	0.00785977	-1.21744	0.161111	-1.1055	0.00853294	-1.24426	0.000202139	-1.382	0.225826	-1.09025	0.0108321	-1.20671	0.999775	-1.00002
NM_007407 // Mm.44245 // brain| embryonic tissue| mammary gland| muscle| pituitary glan	NM_007407 // Adcyap1r1 // adenylate cyclase activating polypeptide 1 receptor 1 // 6 B3	NM_007407	Adcyap1r1	133.304	48.9474	2.72342	5.59157e-10	-3.04901	4.15989e-09	-2.79034	0.000548569	-1.67142	3.67694e-06	-2.08513	0.0131323	-1.42555	0.0646446	-1.29616	0.00398244	-1.51828	0.00308511	-1.53797	0.00381024	-1.52169	0.00129924	-1.60461	0.0594807	-1.30321	0.489584	-1.09984	0.227418	-1.18211	0.201113	-1.19411	0.284477	-1.15957	0.657318	-1.07093	0.559918	-1.09432	0.949524	-1.00873	0.131693	-1.23375	0.232898	-1.20411
NM_023061 // Mm.275003 // adrenal gland| bladder| blood| bone marrow| brain| dorsal roo	NM_023061 // Mcam // melanoma cell adhesion molecule // 9 A5.1|9 // 84004 /// ENSMUST00	NM_023061	Mcam	642.967	402.814	1.59619	3.239e-17	-3.0482	4.51938e-09	-1.78492	0.360149	-1.0742	0.0290716	1.19144	2.06356e-05	1.45387	0.0176823	1.21104	1.27235e-10	-1.95318	3.39552e-05	-1.43609	6.11359e-05	-1.41521	0.000501108	-1.34103	1.51149e-21	-4.4412	9.42723e-19	-3.45101	9.8738e-18	-3.17464	1.31673e-15	-2.70213	0.333565	1.07862	0.00650438	-1.2837	1.10308e-06	-1.64968	0.035699	1.18315	0.030302	-1.18978	0.0767952	1.17102
NM_144551 // Mm.266679 // bladder| bone| bone marrow| brain| dorsal root ganglion| embr	NM_144551 // Trib2 // tribbles homolog 2 (Drosophila) // 12 A1.1|12 // 217410 /// ENSMU	NM_144551	Trib2	159.262	112.494	1.41574	1.57407e-10	-3.0448	7.76724e-11	-3.13936	7.71137e-08	-2.35145	4.92638e-08	2.3948	3.24446e-08	2.43601	0.000771852	1.60458	0.00254498	-1.5191	0.537398	-1.084	0.14269	-1.214	0.00323713	-1.50186	1.55797e-07	-2.28517	0.000254831	-1.68473	7.39931e-08	-2.35541	5.9793e-05	-1.79192	0.118224	-1.23007	0.0182485	1.43173	0.00196995	1.62138	0.0476403	1.30354	0.00870677	1.43056	0.0707403	-1.31074
NM_144795 // Mm.127731 // bone marrow| brain| connective tissue| embryonic tissue| eye|	NM_144795 // Pycr1 // pyrroline-5-carboxylate reductase 1 // 11 E2|11 // 209027 /// ENS	NM_144795	Pycr1	348.015	588.093	0.591768	1.22098e-07	-3.04315	0.0224361	-1.5069	0.0099979	-1.59533	0.408941	1.15486	0.00154863	1.79887	0.000672718	1.89154	1.36947e-05	-2.35732	5.29242e-06	-2.48263	4.40116e-05	-2.2105	0.000264407	-1.99762	3.23732e-08	3.27035	1.4819e-05	2.34717	0.134716	1.30143	0.685574	-1.07289	0.329703	1.1856	6.94744e-08	3.6138	1.2891e-06	3.02696	0.155862	1.28351	0.685954	1.07279	0.772099	1.05815
NM_001162946 // Mm.1845 // bladder| bone| brain| connective tissue| dorsal root ganglio	NM_001162946 // Pcx // pyruvate carboxylase // 19 A|19 0.0 cM // 18563 /// NM_008797 //	NM_001162946	Pcx	228.256	384.255	0.594021	9.29259e-13	-3.0366	4.37191e-12	-2.86304	0.000138848	-1.57298	0.0539968	1.23739	0.0207809	1.29478	0.119396	1.18614	8.98669e-09	-2.18152	2.02616e-07	-1.96347	1.14616e-05	-1.71437	6.81299e-05	-1.61268	0.0211824	1.29366	0.0882335	1.20618	0.106441	-1.19384	0.43071	-1.08911	0.585266	1.06077	1.77775e-06	1.96657	0.0019288	1.49276	0.0365935	1.26121	0.276865	1.1255	0.683838	1.05066
NM_001039485 // Mm.158720 // brain| embryonic tissue| eye| intestine| kidney| liver| ma	NM_001039485 // Fam38b // family with sequence similarity 38, member B // 18 E1|18 // 6	NM_001039485	Fam38b	62.974	28.7052	2.19382	8.4472e-15	-3.02775	7.69993e-13	-2.59391	0.000552272	-1.4105	0.00590989	-1.30497	0.407248	1.07958	0.234947	-1.11657	9.89253e-15	-3.01074	1.48246e-08	-1.91647	1.11229e-07	-1.80835	3.79309e-07	-1.74597	0.607033	-1.04853	0.538944	1.05829	5.26649e-10	-2.11428	8.80863e-11	-2.23189	0.0375259	-1.21754	0.712474	1.03886	0.430486	1.08525	3.54346e-08	-1.8688	7.098e-10	-2.0955	0.129818	-1.17226
NM_145974 // Mm.41760 // bladder| bone marrow| brain| embryonic tissue| extraembryonic	NM_145974 // N4bp3 // NEDD4 binding protein 3 // 11 B1.3|11 // 212706 /// ENSMUST000000	NM_145974	N4bp3	226.265	249.012	0.908652	1.77582e-15	-3.02471	7.71873e-13	-2.47433	3.12431e-05	-1.5055	0.293154	1.09701	0.275434	1.10088	0.310827	1.09332	0.00170435	-1.34018	0.00278629	-1.31968	0.921537	1.00865	0.0562825	-1.18641	7.9376e-05	-1.46666	0.000315307	-1.40978	0.569774	1.05107	0.590057	-1.04833	0.534567	-1.05595	0.0241772	-1.25732	0.000115253	-1.5196	0.00758855	1.27719	0.354808	-1.08476	0.890018	-1.01368
NM_146096 // Mm.28796 // bladder| bone| bone marrow| brain| dorsal root ganglion| embry	NM_146096 // Fam108b // family with sequence similarity 108, member B // 19 B|19 // 226	NM_146096	Fam108b	2079.11	594.791	3.49553	1.87298e-18	-3.02346	7.02154e-14	-2.21842	1.41288e-07	-1.57047	0.00968629	-1.21128	0.840708	1.01436	0.565178	1.04172	0.00037092	-1.31607	0.0912137	-1.12977	0.297199	-1.07728	0.213788	-1.09313	0.00162437	1.26953	0.000109725	1.3541	0.00643078	1.22496	0.00701438	1.22208	0.450018	1.05523	0.693605	1.03192	0.76176	-1.02446	0.317021	1.07403	0.473343	-1.05234	0.109921	1.13826
NR_015555 // Mm.135764 // bladder| brain| embryonic tissue| eye| kidney| lung| olfactor	NR_015555 // 4933404O12Rik // RIKEN cDNA 4933404O12 gene // --- // 66752	NR_015555	4933404O12Rik	135.274	204.872	0.660287	2.07196e-12	-3.02288	1.62062e-05	-1.71605	0.34817	-1.1099	3.33292e-07	-1.96195	0.000331361	-1.54062	0.468135	-1.08377	0.000979519	-1.47917	0.000409438	-1.5286	0.00280974	-1.41938	4.99982e-05	-1.64946	6.8977e-05	-1.63071	0.0273852	-1.28617	0.130133	-1.18504	0.316398	-1.11789	0.887601	-1.01574	0.264572	-1.14987	0.429452	-1.10352	0.0465706	1.25319	0.428632	1.0918	0.806143	1.03095
NM_026058 // Mm.35511 // adipose tissue| adrenal gland| blood| bone| bone marrow| brain	NM_026058 // Lass4 // LAG1 homolog, ceramide synthase 4 // 8|8 A1.2 // 67260 /// ENSMUS	NM_026058	Lass4	116.324	366.251	0.317607	2.75346e-12	-3.01955	1.29034e-09	-2.39942	0.00139256	-1.46425	0.00356647	-1.41013	0.37167	-1.10532	0.76183	1.03439	1.54986e-16	-4.58591	6.38337e-16	-4.29555	7.82539e-16	-4.25597	3.39257e-15	-3.98582	0.000559132	1.51659	0.0223764	1.30152	0.269972	1.132	0.145201	-1.17903	0.200724	-1.15512	0.0686128	1.26256	0.140919	1.20575	0.898595	1.01431	0.13847	-1.18244	0.573588	-1.07321
NM_031997 // Mm.329776 // bladder| bone| bone marrow| brain| dorsal root ganglion| embr	NM_031997 // Tmem2 // transmembrane protein 2 // 19 B|19 // 83921 /// ENSMUST0000009619	NM_031997	Tmem2	1507.84	1030.19	1.46365	5.40792e-23	-3.01849	6.50022e-18	-2.20234	0.000463417	-1.22072	1.3777e-07	-1.39745	0.0473588	-1.11275	0.0731107	1.10086	7.59349e-13	-1.72345	4.59929e-10	-1.53677	7.91494e-06	-1.30791	1.8098e-07	-1.39124	6.47222e-07	-1.3626	0.00116762	1.20058	0.116894	1.08726	0.000575734	1.21602	0.0192668	1.13585	0.0242601	-1.1473	0.0527128	1.12427	0.0287538	1.12578	0.890121	-1.00728	0.868285	-1.00983
ENSMUST00000096433 // Mm.295397 // adrenal gland| bone marrow| brain| embryonic tissue|	ENSMUST00000096433 // Deptor // DEP domain containing MTOR-interacting protein // 15 D1	ENSMUST00000096433	Deptor	354.751	437.488	0.810882	7.63866e-10	-3.011	0.0296107	-1.3613	0.648649	-1.06473	0.00632266	-1.48327	0.540642	1.08797	0.17112	1.20979	0.0172025	-1.40483	0.0920123	-1.2661	2.77556e-05	-1.91241	0.00201445	-1.57168	0.894765	-1.01835	0.0316463	1.3559	0.198123	-1.19581	0.211554	-1.18945	0.642726	1.06594	0.0338605	1.40147	5.02886e-05	2.01217	0.180545	1.20471	0.0993155	1.25938	0.635959	1.07597
NM_007901 // Mm.982 // bladder| bone| bone marrow| brain| connective tissue| embryonic	NM_007901 // S1pr1 // sphingosine-1-phosphate receptor 1 // 3 G1|3 // 13609 /// ENSMUST	NM_007901	S1pr1	459.499	30.649	14.9923	6.29943e-12	-3.00935	0.000177373	-1.60239	0.357685	1.1117	0.430512	-1.09486	0.885531	-1.01662	0.784205	-1.03187	1.68271e-05	1.74746	3.14448e-05	1.70825	0.000710985	1.51929	0.00445684	1.40979	2.06893e-08	2.22026	0.262999	1.13793	0.553562	1.07035	0.0355615	-1.2811	0.000443712	-1.5474	0.0969936	-1.24281	0.188389	-1.18665	1.16234e-06	-1.9229	0.0308335	-1.29031	0.26881	-1.15419
NM_176902 // Mm.489650 // blood| bone| brain| dorsal root ganglion| embryonic tissue| e	NM_176902 // Fam100b // family with sequence similarity 100, member B // 11 E2|11 // 31	NM_176902	Fam100b	124.061	142.133	0.872852	1.56636e-06	-3.00795	6.53204e-06	-2.75648	0.084271	-1.41209	0.722124	1.07226	0.929967	1.01738	0.0594444	1.45961	0.413033	-1.17488	0.0789184	-1.4211	0.0560756	1.46747	0.778371	-1.05675	4.84869e-07	3.23065	0.0741104	1.42969	0.00248299	1.87768	0.619685	1.10235	0.58403	-1.11353	2.99111e-06	3.29705	0.0332925	1.62083	0.0146208	1.64498	0.720205	1.0728	0.241679	-1.29718
NM_010499 // Mm.399 // bladder| blood| bone| bone marrow| brain| dorsal root ganglion|	NM_010499 // Ier2 // immediate early response 2 // 8 C3|8 38.4 cM // 15936 /// ENSMUST0	NM_010499	Ier2	85.5385	263.95	0.324071	2.47242e-10	-3.00315	4.06235e-09	-2.66715	0.0002526	-1.6899	2.42193e-06	-2.05207	0.0107804	-1.41754	0.73895	-1.0447	0.0183831	-1.37802	0.481479	-1.09702	0.542633	-1.08332	0.469607	-1.09981	0.159124	-1.20566	0.0117095	-1.41146	0.328095	-1.13773	0.0121601	-1.40868	0.681584	1.05534	0.603867	-1.07959	0.190079	-1.21559	0.304308	1.14525	0.766024	-1.03981	0.163173	1.2313
NM_019739 // Mm.29891 // adrenal gland| bladder| blood| bone| bone marrow| brain| embry	NM_019739 // Foxo1 // forkhead box O1 // 3 C|3 22.5 cM // 56458 /// ENSMUST00000053764	NM_019739	Foxo1	988.96	738.815	1.33858	2.31461e-20	-2.99846	7.58319e-12	-1.80743	0.0581019	-1.12764	4.46871e-05	-1.32666	0.0314322	-1.14721	0.902018	-1.00765	6.61758e-07	-1.43975	3.38812e-06	-1.39516	7.82939e-05	-1.31194	0.00151823	-1.23355	0.0235201	-1.1561	0.320791	1.06383	0.211429	-1.08131	0.00587214	-1.19642	0.117192	-1.1036	0.00169369	-1.26257	0.0767807	1.13392	0.0412726	-1.13868	0.206033	-1.08234	0.374039	-1.06414
NM_026037 // Mm.167671 // brain| embryonic tissue| extraembryonic tissue| eye| fertiliz	NM_026037 // Mboat2 // membrane bound O-acyltransferase domain containing 2 // 12 A1.3|	NM_026037	Mboat2	545.899	548.638	0.995009	5.62038e-16	-2.99784	1.18847e-15	-2.92247	9.4928e-08	-1.72099	0.50929	-1.05693	0.500788	-1.05812	0.0629351	-1.17249	0.199288	-1.11465	0.849682	-1.01599	0.663622	-1.0371	0.141679	1.13279	2.00959e-06	1.58962	1.18192e-08	1.81767	0.00683924	-1.26797	0.446418	-1.06603	0.00849656	-1.25913	1.98482e-09	2.06428	1.03352e-08	1.96483	0.423983	1.06947	0.495389	1.05888	0.0521104	-1.20578
ENSMUST00000117551 // Mm.18517 // bladder| bone| bone marrow| brain| connective tissue|	ENSMUST00000117551 // Rasa3 // RAS p21 protein activator 3 // 8 A1.1|8 // 19414 /// NM_	ENSMUST00000117551	Rasa3	443.536	143.115	3.09916	3.10081e-16	-2.99401	6.88058e-11	-2.05995	1.80757e-06	-1.5796	6.22318e-05	-1.44155	0.0213786	1.21584	0.0114435	1.24153	1.24829e-11	-2.1598	0.000880752	-1.34126	0.000258923	-1.38757	0.000858231	-1.34224	0.294026	1.09056	5.81312e-05	1.44414	8.21491e-07	-1.61169	0.0209715	-1.21664	0.00298813	-1.29451	0.000985087	1.38588	1.26063e-05	1.58046	0.811552	-1.01976	0.17658	1.11871	0.664202	-1.04087
NM_009767 // Mm.42223 // bone| bone marrow| brain| embryonic tissue| eye| fertilized ov	NM_009767 // Chic1 // cysteine-rich hydrophobic domain 1 // X D|X 42.3 cM // 12212 ///	NM_009767	Chic1	175.18	349.13	0.501761	4.57491e-09	-2.99252	5.76415e-07	-2.39407	0.13432	-1.25073	0.871301	-1.02415	0.207436	1.20631	0.899859	1.01871	0.0840119	-1.2962	0.479769	1.11004	0.00606315	-1.52908	0.952681	-1.00878	0.212009	-1.20401	0.80518	-1.037	0.0487786	1.34666	0.00745994	1.51133	0.00400575	1.56446	0.199052	-1.23959	0.712011	-1.06304	0.312723	1.16142	0.0732641	1.3091	0.0525767	1.38915
NM_007930 // Mm.241073 // bone marrow| brain| dorsal root ganglion| embryonic tissue| e	NM_007930 // Enc1 // ectodermal-neural cortex 1 // 13|13 D1 // 13803 /// ENSMUST0000004	NM_007930	Enc1	960.746	1407.87	0.68241	4.39232e-24	-2.99199	6.03679e-17	-1.98007	0.000449564	-1.2033	0.00073454	-1.19359	0.0683446	-1.09474	0.835404	1.01015	0.00358722	-1.16144	0.00146448	-1.17977	0.000313598	-1.21039	0.00155418	-1.17857	6.60917e-07	-1.33111	0.133059	-1.07689	0.715222	1.0179	0.513504	1.03235	0.626864	1.02394	0.000247326	-1.24465	5.72958e-06	-1.3293	0.285281	1.0537	8.72867e-05	-1.23533	0.869952	-1.00898
NM_001177832 // Mm.390595 // embryonic tissue| blastocyst| organogenesis /// NM_0011778	NM_001177832 // Gm10324 // predicted gene 10324 // 13 B3|13 // 628709 /// NM_001177832	NM_001177832	Gm10324	691.841	3064.21	0.225781	1.25206e-12	-2.99017	1.92318e-09	-2.29337	0.842295	-1.02163	0.0314301	-1.26925	0.117237	-1.18664	0.231534	-1.13863	0.000165899	-1.56061	0.451495	-1.08464	0.0016087	-1.43648	0.0729961	-1.21754	0.0208991	-1.29325	0.0415472	-1.25249	0.256251	1.13097	0.000675272	1.4838	0.0533966	1.23713	0.000144256	-1.65802	0.00199616	-1.4884	0.242228	-1.13524	0.0456192	1.2468	0.0861173	1.23533
NM_001195025 // Mm.100666 // bladder| blood| bone| bone marrow| brain| embryonic tissue	NM_001195025 // Nuak2 // NUAK family, SNF1-like kinase, 2 // 1 E4|1 // 74137 /// NM_028	NM_001195025	Nuak2	580.178	260.388	2.22813	2.41535e-11	-2.98968	1.21914e-05	-1.81276	0.0464977	-1.27661	8.12455e-09	-2.38203	0.00270286	-1.46302	0.718703	-1.04403	0.190204	-1.17156	0.252682	1.14785	0.304725	1.13148	0.0424665	1.28291	2.02484e-07	2.1117	1.22507e-05	1.81243	0.018723	-1.33828	0.166854	-1.18211	0.530611	-1.07804	1.21943e-06	2.14891	0.109444	1.24434	0.270393	-1.14201	0.00162634	-1.49517	0.623741	1.06821
ENSMUST00000022698 // Mm.243323 // bladder| blood| bone| bone marrow| embryonic tissue|	ENSMUST00000022698 // Dok2 // docking protein 2 // 14 D2-D3|14 39.0 cM // 13449 /// NM_	ENSMUST00000022698	Dok2	72.5456	71.22	1.01861	1.61387e-10	-2.98555	3.2024e-07	-2.18998	0.0693034	-1.2688	0.329078	-1.13425	0.255937	-1.1583	0.707146	-1.04942	0.700561	-1.05062	0.243149	-1.16305	0.563825	-1.07702	0.10489	-1.23566	0.000166067	-1.70065	0.00977321	-1.41382	0.00906017	-1.41921	0.0471888	-1.2985	0.112423	-1.22998	0.179585	-1.21617	0.636973	-1.07049	0.0855816	-1.2521	0.137912	-1.21295	0.00591396	-1.51743
NM_001081173 // Mm.30506 // bladder| bone marrow| brain| embryonic tissue| eye| intesti	NM_001081173 // Lrch2 // leucine-rich repeats and calponin homology (CH) domain contain	NM_001081173	Lrch2	211.28	407.168	0.5189	1.22446e-13	-2.98222	1.58164e-14	-3.21877	0.000465005	-1.45667	5.71711e-07	-1.79953	0.00840696	-1.31423	0.0426827	-1.22905	0.026088	-1.25566	0.188856	-1.14069	0.092326	-1.18513	0.318495	-1.10457	0.00123977	-1.4089	0.357355	-1.09601	0.15262	-1.15441	0.836184	-1.0207	0.851683	1.0187	0.0168174	-1.31819	0.417939	-1.09477	0.527887	1.0647	0.228648	1.12793	0.160396	1.17147
NM_013462 // Mm.278475 // bladder| embryonic tissue| eye| heart| intestine| kidney| mam	NM_013462 // Adrb3 // adrenergic receptor, beta 3 // 8 A2-A4|8 10.0 cM // 11556 /// ENS	NM_013462	Adrb3	289.465	196.75	1.47123	6.71231e-10	-2.98221	5.29245e-06	-2.03422	0.32532	-1.1436	0.902583	-1.01673	0.613076	-1.07108	0.0901152	1.26376	0.0146761	-1.41057	0.0260908	-1.36553	0.576826	-1.07875	0.00110599	-1.60724	0.000137373	-1.76755	2.15828e-07	-2.32809	0.696698	1.05432	0.066567	-1.28946	0.69035	1.05555	1.72945e-06	-2.34199	4.81519e-06	-2.23086	0.0359795	-1.3399	0.0475058	-1.31737	0.947586	-1.01006
NM_013914 // Mm.103673 // skin| spleen| testis| thymus| fetus| juvenile| adult /// ENSM	NM_013914 // Snai3 // snail homolog 3 (Drosophila) // 8 E1|8 // 30927 /// ENSMUST000000	NM_013914	Snai3	462.081	207.332	2.2287	2.10821e-13	-2.97588	1.57675e-06	-1.76026	0.523826	-1.06647	0.848918	1.01937	0.669609	1.04395	0.406627	-1.08756	0.554971	1.06139	0.0872575	1.19185	0.0166526	1.28444	0.0922434	1.1885	2.70513e-06	-1.73073	0.000451865	-1.46715	1.11753e-05	-1.65509	0.00129452	-1.41472	0.0116509	-1.30322	0.0180891	-1.31971	0.0052668	-1.39417	0.313335	-1.1076	0.106376	-1.17983	0.239408	-1.14374
NM_001242358 // Mm.196332 // bladder| blood| bone marrow| brain| embryonic tissue| extr	NM_001242358 // Trnt1 // tRNA nucleotidyl transferase, CCA-adding, 1 // 6|6 E2 // 70047	NM_001242358	Trnt1	652.175	432.882	1.50659	2.77219e-18	-2.97445	1.69884e-15	-2.44949	1.023e-06	-1.50143	2.22622e-17	-2.78474	1.01465e-12	-2.06553	0.0779794	-1.13556	2.55971e-08	-1.62848	2.54487e-08	-1.62869	0.638776	-1.03378	0.0056773	-1.22825	0.00913283	-1.2125	0.0016074	-1.26888	0.539826	1.04439	0.804219	-1.01768	0.924605	1.00671	0.824566	1.01777	0.0326475	-1.19101	0.000611626	1.29928	0.447504	1.05537	0.852454	1.01488
NM_001033270 // Mm.258893 // bladder| blood| bone| bone marrow| brain| dorsal root gang	NM_001033270 // Slc4a7 // solute carrier family 4, sodium bicarbonate cotransporter, me	NM_001033270	Slc4a7	1025.73	780.503	1.31419	2.36039e-13	-2.96962	1.15508e-10	-2.39019	6.35752e-08	-1.94895	5.91711e-05	-1.57052	0.992691	-1.00092	0.148618	1.15918	1.40919e-07	-1.90076	0.0660345	-1.20874	0.00124449	-1.41762	0.00106224	-1.42553	4.53362e-07	1.83235	6.96784e-08	1.94333	0.0600556	-1.21425	0.130758	-1.16734	0.781228	-1.02843	1.3279e-09	2.43183	2.47167e-11	2.82263	0.363267	-1.0966	0.711036	1.03812	0.0708638	-1.23264
NM_175696 // Mm.295327 // brain| embryonic tissue| eye| intestine| lung| mammary gland|	NM_175696 // C530028O21Rik // RIKEN cDNA C530028O21 gene // 6 F2|6 // 319352 /// NM_001	NM_175696	C530028O21Rik	69.4971	79.9064	0.86973	4.44811e-09	-2.9656	0.000447025	-1.74337	0.343254	-1.14919	0.979731	-1.00371	0.729993	1.05167	0.1479	1.23858	0.525777	-1.09723	0.03448	-1.37379	0.108335	-1.26895	0.00162889	-1.63359	1.45803e-05	-2.04969	0.0022325	-1.60704	0.040543	-1.35943	0.0252953	-1.40095	0.329893	-1.15373	0.103347	-1.31209	0.682373	-1.06945	0.382984	1.13642	0.686265	1.06076	0.349783	-1.16663
NM_008719 // Mm.2380 // brain| embryonic tissue| fertilized ovum| heart| inner ear| int	NM_008719 // Npas2 // neuronal PAS domain protein 2 // 1 B|1 20.0 cM // 18143 /// ENSMU	NM_008719	Npas2	137.68	36.5748	3.76433	2.35572e-09	-2.96541	0.0708559	-1.29954	0.926546	1.01318	0.169303	-1.21844	0.859824	1.0254	0.869493	-1.02361	3.97749e-05	-1.9221	0.00054439	-1.70164	2.94919e-06	-2.15913	0.000720115	-1.67876	0.0307714	1.37192	0.473219	1.10759	0.218819	1.19283	0.210511	1.19676	0.574761	-1.0831	0.23909	1.20867	0.745769	1.05313	0.712611	1.05374	0.35557	1.141	0.629352	-1.08017
NM_021457 // Mm.246003 // adrenal gland| bladder| bone| bone marrow| brain| connective	NM_021457 // Fzd1 // frizzled homolog 1 (Drosophila) // 5 A1|5 5.0 cM // 14362 /// ENSM	NM_021457	Fzd1	92.1232	32.4078	2.84262	1.02025e-10	-2.96478	1.34839e-09	-2.66742	0.0137687	-1.3785	0.00893749	-1.40838	0.0165658	-1.36559	0.194885	-1.17834	0.000208085	-1.66378	6.96641e-05	-1.73977	0.025952	-1.33386	0.424246	-1.1057	0.938058	-1.00978	0.940934	-1.00932	0.675179	-1.05394	0.523609	-1.08337	0.601566	1.0677	0.311835	-1.15402	0.086799	-1.27841	0.26809	-1.15004	0.0360662	-1.31016	0.428875	1.11825
ENSMUST00000044478 // Mm.222063 // blood| bone marrow| brain| embryonic tissue| extraem	ENSMUST00000044478 // Hibch // 3-hydroxyisobutyryl-Coenzyme A hydrolase // 1 C1.1|1 //	ENSMUST00000044478	Hibch	761.073	354.237	2.14849	3.29168e-18	-2.96191	9.72912e-15	-2.33576	3.86997e-08	-1.61457	1.64705e-06	-1.48652	0.0898732	-1.13009	0.948716	1.00456	0.00173261	-1.26687	0.186407	-1.09918	0.0309498	-1.17048	0.642207	-1.03347	2.43433e-06	1.47378	0.00595995	1.22696	0.898115	1.0091	0.909161	1.00811	0.00846175	1.21533	4.25477e-07	1.61427	4.3052e-07	1.6138	0.957321	1.00379	0.0117843	1.20419	0.219017	1.10373
NM_153098 // Mm.32955 // bone marrow| brain| embryonic tissue| extraembryonic tissue| e	NM_153098 // Cd109 // CD109 antigen // 9 E1|9 // 235505 /// ENSMUST00000093812 // Cd109	NM_153098	Cd109	87.4157	164.197	0.532384	6.70924e-06	-2.96177	4.49294e-05	-2.61008	0.558361	1.13126	0.461924	-1.16792	0.491781	1.15603	0.706869	-1.08236	0.0157917	-1.6943	0.0470029	-1.53501	0.0324855	-1.58926	0.891437	-1.02912	8.39895e-08	-3.94518	0.114014	-1.40178	4.44167e-06	-3.0432	0.00116167	-2.08005	0.0908682	-1.43649	0.0659988	-1.55895	0.0228181	1.74436	0.260369	-1.26948	0.609557	1.11356	0.0839083	-1.51646
NM_001081279 // Mm.103246 // bladder| blood| brain| embryonic tissue| extraembryonic ti	NM_001081279 // Mfhas1 // malignant fibrous histiocytoma amplified sequence 1 // 8 A4|8	NM_001081279	Mfhas1	32.6303	24.2639	1.34481	3.36965e-10	-2.9613	4.59938e-10	-2.92213	6.02158e-08	-2.38448	0.594575	1.07237	0.782209	1.03691	0.979055	1.00345	0.638644	1.06356	0.996188	-1.00063	0.765322	1.03991	0.271634	1.15626	0.971616	1.00467	0.711763	1.04965	0.958195	-1.00689	0.989998	-1.00164	0.820457	1.0302	0.172558	-1.22542	0.66294	-1.06636	0.603507	-1.07055	0.805494	1.03281	0.235204	1.1929
NM_008605 // Mm.2055 // bladder| blood| bone marrow| connective tissue| embryonic tissu	NM_008605 // Mmp12 // matrix metallopeptidase 12 // 9 A1|9 1.0 cM // 17381 /// ENSMUST0	NM_008605	Mmp12	41.4051	32.7547	1.2641	2.46573e-17	-2.96004	7.2827e-18	-3.08251	1.05172e-10	-1.91787	0.0727802	-1.14757	0.0963257	1.13564	0.636004	1.03625	6.40399e-08	1.64335	7.34497e-12	2.05212	9.93376e-10	1.8148	1.10691e-10	1.91543	0.0575084	-1.1573	0.262569	-1.08856	0.314238	-1.07907	0.763777	1.02285	0.309319	1.07992	0.0597552	-1.1766	0.00587152	-1.27692	0.410575	-1.06406	0.161743	-1.11234	0.207769	1.11342
ENSMUST00000071325 // Mm.255596 // bladder| bone marrow| brain| connective tissue| embr	ENSMUST00000071325 // Nf1 // neurofibromatosis 1 // 11 B4-5|11 46.06 cM // 18015 /// NM	ENSMUST00000071325	Nf1	467.875	321.51	1.45524	2.44392e-18	-2.95999	2.8202e-10	-1.79473	0.0272132	-1.17332	0.63237	1.03416	0.224885	1.08969	0.293983	-1.07691	0.00410767	-1.23664	0.198509	-1.09539	0.0436784	-1.15629	0.761651	1.0215	0.042355	1.15742	2.9386e-05	1.39006	0.206759	-1.09355	0.0646953	1.14158	0.414754	1.0591	0.445166	-1.06222	0.649813	1.03646	0.000170123	-1.33594	0.0321461	-1.1674	0.420148	1.06584
BC004797 // Mm.38143 // bladder| bone| brain| embryonic tissue| eye| fertilized ovum| i	BC004797 // 0610040J01Rik // RIKEN cDNA 0610040J01 gene // 5 C3.1|5 // 76261 /// NM_029	BC004797	0610040J01Rik	304.432	83.163	3.66067	2.025e-08	-2.95838	2.15146e-05	-2.10895	0.166252	-1.24363	0.0170575	1.46985	0.0285672	1.42107	0.191782	1.22789	0.104405	1.293	0.337752	1.16184	0.25931	1.19353	0.221936	-1.21147	0.0053774	1.57717	0.135574	1.26559	0.836583	1.03261	0.322624	-1.16746	0.344771	-1.15929	0.0647319	1.3911	0.42177	1.15142	0.577273	-1.09076	0.124265	-1.27481	0.420978	-1.1517
NM_001044384 // Mm.8245 // bone| brain| connective tissue| embryonic tissue| heart| joi	NM_001044384 // Timp1 // tissue inhibitor of metalloproteinase 1 // X A1.3|X 6.2 cM //	NM_001044384	Timp1	679.501	819.023	0.829648	0.000749404	-2.9484	3.88464e-06	-4.88891	0.00192066	-2.67369	0.86856	1.05047	0.888212	-1.04271	0.831941	-1.06518	0.335345	1.33418	0.851485	1.05729	0.541279	1.19981	0.505427	1.21979	0.0914705	-1.6677	0.126195	-1.58708	0.0748946	-1.71756	0.0486761	-1.82489	0.496414	-1.22499	0.727411	-1.12367	0.739355	-1.11771	0.827463	-1.067	0.569155	-1.18496	0.715947	-1.12945
ENSMUST00000105107 // Mm.221389 // embryonic tissue| eye| tongue| fetus| adult /// ENSM	ENSMUST00000105107 // Hist2h3b // histone cluster 2, H3b // 3 F2.1|3 // 319154 /// ENSM	ENSMUST00000105107	Hist2h3b	279.41	436.041	0.640787	2.10809e-06	-2.9339	0.00400241	-1.80777	0.75364	-1.06309	0.140248	-1.3383	0.000331995	-2.14196	0.0739377	-1.4268	0.000238789	2.18818	0.417925	1.17171	0.035276	1.52523	0.577684	1.1148	0.870163	-1.03236	0.0128832	-1.65622	0.0148952	1.63744	0.291812	1.22978	0.898044	1.02528	0.945097	1.01519	0.359729	-1.22331	0.0901455	1.39983	0.121838	1.35813	0.416147	-1.19571
---	XM_979107 // Gm7762 // predicted gene 7762 // 13 B3|13 // 665738 /// XM_979107 // Gm776	XM_979107	Gm7762	386.903	1852.3	0.208877	8.00379e-08	-2.92924	5.73961e-05	-2.08888	0.825916	-1.0368	0.0528164	-1.38538	0.370105	-1.15951	0.533546	-1.10797	0.235976	-1.21709	0.276975	1.19717	0.80584	1.04122	0.20328	1.23516	0.00426545	-1.64118	0.076064	-1.34642	0.769659	1.0493	0.0109216	1.54692	0.0937352	1.32366	0.0129596	-1.61222	0.0751903	-1.39831	0.861016	1.02918	0.0327767	1.43518	0.192453	1.27537
NM_001081071 // Mm.329194 // blood| bone marrow| brain| connective tissue| embryonic ti	NM_001081071 // Lclat1 // lysocardiolipin acyltransferase 1 // 17 E2|17 // 225010 /// N	NM_001081071	Lclat1	553.178	268.727	2.05851	7.41337e-13	-2.92782	2.33369e-13	-3.05733	9.6586e-08	-1.9569	0.0112474	1.31493	1.44105e-05	1.66499	0.127573	1.17371	1.76079e-08	-2.06794	1.45478e-05	-1.66447	1.1633e-10	-2.44511	6.04825e-11	-2.5009	7.67648e-08	1.97147	0.410568	-1.08935	0.00020151	1.52505	0.00112878	-1.43577	0.225261	-1.13515	2.95772e-07	2.04178	0.000197532	1.60795	0.214716	1.13855	0.219177	-1.1371	0.00033923	-1.57473
AJ005350 // Mm.442631 // ---	AJ005350 // Zfp125 // zinc finger protein 125 // --- // 22651	AJ005350	Zfp125	860.767	790.609	1.08874	2.67514e-12	-2.92759	5.02408e-07	-1.90892	0.833522	1.02303	0.000224345	-1.54883	0.023972	-1.28755	0.0322584	-1.26986	7.36809e-06	1.74364	8.20629e-09	2.19437	2.70322e-05	1.66795	5.77852e-06	1.75807	5.13372e-08	-2.06153	1.89513e-05	-1.6884	0.166917	-1.16361	0.00101442	1.46561	0.000448248	1.51058	0.00173982	-1.50156	4.74177e-05	-1.73851	0.166628	1.16374	0.00310319	1.40388	0.00208229	1.48991
NR_037996 // Mm.441435 // eye| intestine| mammary gland| ovary| skin| testis|oocyte| ju	NR_037996 // Hmga2-ps1 // high mobility group AT-hook 2, pseudogene 1 // 1|1 // 15365	NR_037996	Hmga2-ps1	95.0414	42.427	2.24012	2.10425e-09	-2.92545	6.91138e-10	-3.07579	3.26482e-06	-2.12145	0.0036103	-1.5365	0.00115528	-1.62644	0.100868	-1.26241	0.252448	-1.17478	0.00115984	-1.62613	0.010659	-1.45062	0.169005	-1.2145	0.624162	-1.07088	0.0862371	1.27643	0.205156	-1.19563	0.141126	1.23157	0.567842	1.08317	0.645625	-1.07488	0.235431	1.20655	0.0843612	-1.27838	0.525687	1.09286	0.915212	1.01684
NR_027800 // Mm.46270 // embryonic tissue| liver| mammary gland| muscle| testis| tongue	NR_027800 // Gm16516 // predicted gene, Gm16516 // 11 B2|11 // 24082 /// BC031537 // Gm	NR_027800	Gm16516	441.293	286.734	1.53903	2.43283e-18	-2.92383	6.16848e-11	-1.84602	0.000237342	-1.32142	0.00126533	-1.27037	0.593858	-1.03771	0.0715953	1.13601	6.91455e-07	-1.50216	2.50354e-05	-1.38972	0.0106331	-1.20295	6.55532e-06	-1.43097	0.00447292	1.23093	0.00382491	1.23589	0.00967056	1.20606	0.541674	1.0433	0.0929663	1.12589	0.00118936	1.31072	0.00497112	1.25908	0.0259966	1.17276	0.667222	-1.03028	0.721602	1.02816
NM_001111324 // Mm.288980 // adrenal gland| bladder| blood| bone| bone marrow| brain| c	NM_001111324 // Nedd9 // neural precursor cell expressed, developmentally down-regulate	NM_001111324	Nedd9	190.331	49.5684	3.83977	4.61596e-09	-2.92368	0.00112147	-1.65534	0.465167	1.11146	0.230038	-1.19087	0.155838	-1.23039	0.40474	-1.12826	0.412346	-1.12605	0.981937	1.00327	0.287379	-1.16711	0.433074	-1.12017	5.51181e-08	2.61209	0.00856659	1.48686	0.00389133	1.55232	0.586311	-1.08179	0.0155501	-1.43689	0.671681	-1.07116	0.814806	-1.03869	0.39937	-1.12984	0.748963	-1.04725	0.519676	1.11025
NM_172659 // Mm.41203 // bladder| blood| bone| bone marrow| brain| embryonic tissue| ey	NM_172659 // Slc2a6 // solute carrier family 2 (facilitated glucose transporter), membe	NM_172659	Slc2a6	114.545	38.5813	2.96893	9.44966e-12	-2.91362	3.46636e-08	-2.15409	0.115648	-1.19759	0.446313	-1.09004	0.375258	1.10573	0.379369	1.10477	0.0892911	-1.21563	0.367744	-1.10751	0.753899	1.03601	0.0676431	1.23445	0.440662	1.09122	0.101493	1.20677	0.89989	1.01429	0.433424	1.09275	0.398566	-1.10037	0.148696	-1.20382	0.64045	-1.06106	0.135989	-1.186	0.532905	-1.07305	0.951995	-1.00766
ENSMUST00000088552 // Mm.271770 // bladder| bone| brain| connective tissue| dorsal root	ENSMUST00000088552 // Myl9 // myosin, light polypeptide 9, regulatory // 2 H1|2 // 9893	ENSMUST00000088552	Myl9	66.0607	304.64	0.216849	8.67053e-06	-2.91087	0.0073019	-1.80613	0.100006	-1.42169	0.343744	-1.22159	0.706471	-1.08245	0.677699	1.09138	0.222677	-1.29535	0.832957	1.04534	0.863542	-1.03679	0.59184	-1.11952	0.39837	-1.19521	0.861745	1.03729	0.841291	-1.043	0.734058	-1.07407	0.0491534	-1.52814	0.764415	1.07338	0.216224	-1.34306	0.124399	1.38812	0.184517	-1.32592	0.203989	-1.35411
NM_013666 // Mm.365178 // brain| epididymis| extraembryonic tissue| eye| inner ear| joi	NM_013666 // St8sia5 // ST8 alpha-N-acetyl-neuraminide alpha-2,8-sialyltransferase 5 //	NM_013666	St8sia5	66.7655	61.5343	1.08501	3.84183e-11	-2.90786	2.69744e-09	-2.46521	0.0133063	-1.35725	0.668851	-1.05207	0.147256	1.19024	0.531015	1.07729	8.41462e-25	-16.4007	1.77508e-23	-13.0943	1.53589e-24	-15.6675	7.26024e-24	-13.9644	1.5084e-07	2.12145	0.00064974	1.54748	0.00260155	1.46076	0.909329	-1.01359	0.0486746	-1.27085	6.77958e-05	1.80418	4.93932e-05	1.82879	0.00504976	1.41908	0.0196509	1.33185	0.425209	-1.11254
NM_013511 // Mm.306026 // bladder| blood| bone| bone marrow| brain| connective tissue|	NM_013511 // Epb4.1l2 // erythrocyte protein band 4.1-like 2 // 10 A4|10 18.0 cM // 138	NM_013511	Epb4.1l2	907.89	582.846	1.55769	1.7538e-14	-2.90666	1.29878e-09	-2.03782	0.00901026	-1.28121	0.0864069	1.17183	7.80674e-05	1.48861	0.191156	1.1274	2.64363e-05	-1.53616	0.164525	-1.13621	0.00725715	-1.29098	0.0160669	-1.25466	0.00537858	1.3044	0.0143311	1.25996	0.00157234	1.35849	0.22524	1.11748	0.450633	-1.0711	0.0248041	-1.26676	0.475275	-1.07575	0.121212	-1.15351	0.128476	-1.15028	0.877848	-1.01579
ENSMUST00000067924 // Mm.319847 // bladder| blood| bone| bone marrow| brain| embryonic	ENSMUST00000067924 // Lrrc8c // leucine rich repeat containing 8 family, member C // 5	ENSMUST00000067924	Lrrc8c	880.954	202.06	4.35986	1.49207e-09	-2.89499	6.37339e-05	-1.83377	0.498989	-1.09679	0.0639351	-1.2945	0.28894	-1.15666	0.164137	-1.21162	0.872765	-1.02206	0.829275	1.02982	0.989717	1.00176	0.31613	1.14737	2.08168e-05	1.92516	0.00031648	1.70732	0.328158	1.14345	0.177114	1.20452	1.39865e-05	-1.95839	0.256094	-1.19162	0.436682	-1.12698	0.533073	-1.08887	0.298155	1.15344	0.690642	-1.06289
NM_145587 // Mm.29660 // bone| brain| dorsal root ganglion| embryonic tissue| extraembr	NM_145587 // Sbk1 // SH3-binding kinase 1 // 7|7 F1-F3 // 104175 /// ENSMUST00000056028	NM_145587	Sbk1	79.9384	296.556	0.269556	3.19797e-07	-2.89469	0.000586574	-1.90924	0.329734	1.18596	0.554793	-1.10843	0.142612	1.29508	0.64264	1.08417	0.0525831	-1.41267	0.780434	-1.0497	0.332453	-1.18482	0.271518	-1.21257	0.0682102	1.3828	0.582655	-1.10049	0.701746	1.06894	0.00291815	-1.73115	0.0266191	-1.48913	0.564718	1.11938	0.717993	1.07319	0.0610698	1.39555	0.583398	1.10028	0.683436	1.08304
NM_018884 // Mm.321654 // adrenal gland| bone| brain| connective tissue| embryonic tiss	NM_018884 // Pdzrn3 // PDZ domain containing RING finger 3 // 6 D3|6 // 55983 /// ENSMU	NM_018884	Pdzrn3	185.33	34.583	5.35899	2.86428e-17	-2.89426	8.52517e-14	-2.28205	0.00347026	-1.25673	3.2277e-07	-1.57056	0.21831	-1.09623	0.685383	-1.03043	0.0870954	-1.13755	0.789951	-1.01989	0.0155735	-1.20412	0.292258	-1.08155	5.68153e-15	2.46309	9.0975e-15	2.42994	1.88907e-11	1.98034	1.64543e-14	2.38925	0.0135122	-1.20924	0.00409031	1.28624	0.0050721	1.2777	0.902419	-1.0091	0.0156814	1.20386	0.00751904	-1.26192
NM_153788 // Mm.288671 // bladder| blood| bone| bone marrow| embryonic tissue| epididym	NM_153788 // Acap1 // ArfGAP with coiled-coil, ankyrin repeat and PH domains 1 // 11 B3	NM_153788	Acap1	856.105	210.779	4.06162	2.90368e-13	-2.8935	4.89588e-08	-1.94267	0.00243677	-1.3763	4.67147e-05	1.57029	0.0327116	1.24384	0.131791	1.16379	0.718584	1.03641	0.640546	-1.04746	0.484229	1.07207	0.162264	-1.15069	5.61358e-08	-1.93445	0.472913	-1.07403	2.42109e-05	-1.60324	0.126651	-1.16625	0.862961	1.01727	0.591424	-1.06176	0.382615	1.10271	0.23959	1.12488	0.958195	1.00521	0.950425	1.00695
NM_009829 // Mm.333406 // adipose tissue| adrenal gland| bladder| blood| bone| bone mar	NM_009829 // Ccnd2 // cyclin D2 // 6 F3|6 61.1 cM // 12444 /// ENSMUST00000000188 // Cc	NM_009829	Ccnd2	29.9986	202.729	0.147974	0.000175375	-2.89124	0.000555735	-2.61837	0.00951956	-2.0098	0.900382	1.03277	0.732753	1.09201	0.770989	1.0779	0.697925	-1.10525	0.793087	1.06993	0.883574	-1.03845	0.522392	-1.17963	6.84605e-12	-11.836	2.86279e-10	-8.56593	2.05998e-05	-3.45295	6.29583e-06	-3.80115	0.474512	1.20301	1.14351e-08	-7.92727	3.36859e-05	-3.84669	0.0552173	-1.65836	0.434385	-1.22404	0.079735	1.67765
NM_019636 // Mm.286353 // bladder| blood| bone| bone marrow| brain| embryonic tissue| e	NM_019636 // Tbc1d1 // TBC1 domain family, member 1 // 5 C3.1|5 // 57915 /// ENSMUST000	NM_019636	Tbc1d1	581.72	324.209	1.79428	7.19957e-16	-2.88909	5.46824e-11	-2.06271	0.000237721	-1.38767	0.207079	1.10944	0.16928	1.12005	0.518983	1.0541	0.920915	-1.00812	0.1309	1.13305	0.55739	1.04907	0.768017	1.02434	0.0079487	1.2542	0.00220797	1.30381	0.715798	-1.03013	0.30596	-1.0876	0.856471	-1.01485	0.474134	1.06795	0.0125124	1.26892	0.0312677	-1.19826	0.217289	-1.10685	0.955048	-1.00517
NM_001081267 // Mm.43977 // bladder| blood| bone marrow| brain| embryonic tissue| extra	NM_001081267 // Rsf1 // remodeling and spacing factor 1 // 7 E2|7 // 233532 /// ENSMUST	NM_001081267	Rsf1	446.347	426.825	1.04574	8.16451e-18	-2.8864	4.9225e-14	-2.24121	0.00143071	-1.27387	0.215654	-1.09282	0.141476	1.11165	0.959941	-1.00357	0.00213317	-1.26112	0.00356068	-1.24459	4.19966e-06	-1.45781	0.00701629	-1.22231	0.0274714	1.17533	0.0195284	1.18743	0.0142694	1.19832	0.00310654	1.24901	0.972215	1.00248	0.0135368	-1.2275	0.801671	1.02024	0.0148058	-1.19705	0.285584	1.07935	0.917857	1.00826
NM_027238 // Mm.5540 // blood| bone| bone marrow| brain| connective tissue| embryonic t	NM_027238 // Ttc39b // tetratricopeptide repeat domain 39B // 4 C3|4 // 69863 /// ENSMU	NM_027238	Ttc39b	108.801	324.593	0.335193	9.54544e-12	-2.88594	3.28057e-08	-2.14411	0.0293391	-1.28571	0.0708892	-1.22912	0.19146	1.15915	0.308765	1.12139	0.198816	-1.15629	0.662809	1.05002	0.242171	-1.14104	0.283986	1.12828	0.396094	-1.10002	0.552539	-1.06883	0.546612	1.0699	0.159951	1.17252	0.102502	1.20414	0.0885511	-1.24364	0.927731	-1.01146	0.57	-1.06572	0.0715064	1.22854	0.16351	1.19396
NM_001252438 // Mm.37332 // bladder| blood| bone marrow| brain| embryonic tissue| epidi	NM_001252438 // D16Ertd472e // DNA segment, Chr 16, ERATO Doi 472, expressed // 16 C3.1	NM_001252438	D16Ertd472e	514.68	343.349	1.499	1.28364e-14	-2.88229	1.98779e-08	-1.8623	0.230112	-1.11397	0.0182261	-1.24382	0.185439	-1.12675	0.334666	-1.09033	0.140307	-1.14255	0.0212122	-1.23685	0.383027	-1.08124	0.423644	-1.07421	1.80017e-15	-3.08729	1.86163e-13	-2.6354	1.36559e-06	-1.65589	8.14072e-08	-1.79046	0.0334645	1.2155	2.43427e-05	-1.61017	0.000843966	-1.43305	0.0005536	1.39524	0.0208501	1.23764	0.000445357	1.46463
NM_172589 // Mm.316553 // bladder| blood| bone| brain| embryonic tissue| extraembryonic	NM_172589 // Lhfpl2 // lipoma HMGIC fusion partner-like 2 // 13 D1|13 // 218454 /// ENS	NM_172589	Lhfpl2	209.742	47.1714	4.44637	5.89061e-05	-2.88169	0.324355	-1.26429	0.604095	1.13068	0.938409	1.01844	0.945773	-1.01621	0.515871	-1.16655	0.294484	1.28359	0.358515	1.24397	0.433233	1.20447	0.0154735	1.8129	0.188929	1.3691	0.324694	1.26408	0.96404	1.01072	0.828152	-1.05268	0.673547	1.10487	0.325377	1.30075	0.13079	1.50299	0.873297	-1.03843	0.598864	1.1327	0.699732	1.10801
NM_001145960 // Mm.440037 // blood| bone| brain| embryonic tissue| intestine| joint| li	NM_001145960 // Slc37a2 // solute carrier family 37 (glycerol-3-phosphate transporter),	NM_001145960	Slc37a2	119.783	40.8768	2.93033	9.83222e-10	-2.87974	2.57808e-06	-2.07095	0.140857	1.22023	0.0129657	-1.41175	0.220729	-1.17916	0.305519	-1.14739	5.02318e-09	-2.68595	6.88688e-08	-2.40652	3.79504e-07	-2.24201	6.05739e-06	-1.99864	0.000198462	1.72266	0.138359	1.22182	0.309562	1.14606	0.577319	1.07726	0.826849	1.02959	0.0568311	1.33915	0.554305	1.0928	0.499524	-1.09445	0.92872	-1.01199	0.716572	1.05592
ENSMUST00000000573 // Mm.431947 // embryonic tissue| eye| fertilized ovum| mammary glan	ENSMUST00000000573 // Ovgp1 // oviductal glycoprotein 1 // 3|3 F3 // 12659 /// NM_00769	ENSMUST00000000573	Ovgp1	109.624	56.8954	1.92676	6.67268e-08	-2.86793	0.00082442	-1.77725	0.193073	-1.23379	0.158797	-1.25595	0.584127	-1.0915	0.103247	1.30298	0.000852716	-1.77395	0.000562061	-1.81479	0.0213527	-1.46293	0.000392508	-1.85025	0.00800087	1.55805	0.0468094	1.38498	0.303257	1.17997	0.641986	1.07716	0.126172	1.28134	0.000314315	2.02327	0.00277208	1.76717	0.230086	1.21337	0.596594	1.08834	0.935395	1.01465
NM_030110 // Mm.169893 // adrenal gland| bone marrow| brain| embryonic tissue| eye| hea	NM_030110 // Efha2 // EF-hand domain family, member A2 // 8 A4|8 // 78506 /// ENSMUST00	NM_030110	Efha2	233.761	667.466	0.350222	1.10807e-11	-2.86631	1.57408e-09	-2.38577	0.00221088	-1.43856	0.0212554	-1.30523	0.0179456	-1.31553	0.803951	1.02813	0.00239924	-1.43385	0.220579	-1.14816	0.0220676	-1.30294	0.0925447	-1.21092	4.08237e-09	2.30586	8.51589e-11	2.65401	0.372876	1.10522	1.50606e-05	1.7305	0.321789	1.11781	0.00433936	1.45892	1.43417e-06	2.03089	0.363739	-1.10737	2.10842e-05	1.71007	0.00543746	1.44353
NM_001135192 // Mm.358946 // brain| embryonic tissue| eye| fertilized ovum| inner ear|	NM_001135192 // Asap2 // ArfGAP with SH3 domain, ankyrin repeat and PH domain 2 // 12 A	NM_001135192	Asap2	389.587	142.632	2.73142	9.9128e-15	-2.86382	5.86261e-12	-2.33314	1.52443e-06	-1.63901	0.264289	1.10388	0.0317484	1.21455	0.418505	1.07396	7.22196e-06	-1.57063	2.22506e-05	-1.5225	5.4704e-06	-1.58267	7.02697e-06	-1.57182	0.00154197	1.34605	1.76476e-07	1.73836	0.294837	-1.09708	0.371238	-1.08213	0.038009	-1.20612	0.00106591	1.41435	3.90387e-05	1.57566	0.433426	-1.07151	0.0252146	-1.2252	0.0357056	-1.23777
ENSMUST00000146730 // Mm.311840 // brain| embryonic tissue| eye| heart| lung| oviduct|	ENSMUST00000146730 // Dlgap1 // discs, large (Drosophila) homolog-associated protein 1	ENSMUST00000146730	Dlgap1	39.3874	27.5989	1.42714	1.79183e-15	-2.86248	2.31084e-12	-2.29051	0.0105413	1.24844	5.00753e-06	-1.54774	0.000260197	-1.39338	0.142884	-1.13143	1.62426e-08	-1.79554	5.75736e-07	-1.6368	0.323585	-1.08606	0.433781	-1.06749	0.579875	1.04718	0.87361	1.01331	0.866019	-1.01412	0.233242	-1.10516	0.45443	-1.06438	0.348567	1.09203	0.187083	1.1327	0.902346	-1.01025	0.747945	-1.02709	0.285367	-1.10573
NM_027975 // Mm.85162 // bladder| bone| bone marrow| brain| connective tissue| dorsal r	NM_027975 // Fam83d // family with sequence similarity 83, member D // 2 H1|2 // 71878	NM_027975	Fam83d	1154.07	1297.3	0.889592	5.22661e-17	-2.86182	1.35636e-14	-2.41851	0.000323673	-1.33885	0.0015665	-1.28605	0.970103	-1.00279	0.9877	-1.00115	0.0983094	-1.1335	0.709733	1.02813	0.284412	-1.08362	0.045021	-1.1656	0.00653788	1.2369	0.971042	-1.00271	0.421597	1.06194	0.227116	1.09505	0.237117	-1.0929	0.284569	1.0944	0.0236123	-1.21633	0.767591	-1.02226	0.406803	-1.06401	0.562615	-1.04975
NM_011141 // Mm.297371 // bone marrow| brain| embryonic tissue| eye| skin| testis| gast	NM_011141 // Pou3f1 // POU domain, class 3, transcription factor 1 // 4 D2.2|4 56.1 cM	NM_011141	Pou3f1	858.065	274.949	3.12081	4.80566e-08	-2.8606	8.20385e-05	-1.98416	0.135316	-1.26825	0.375379	-1.14996	0.643979	-1.07527	0.643696	1.07534	0.454551	-1.12491	0.588424	-1.08874	0.94552	-1.01077	0.282306	-1.18516	0.000578789	-1.79294	0.434998	-1.13078	0.0705261	-1.33607	0.0684876	-1.33904	0.0186273	-1.46613	0.636975	-1.08684	0.856164	1.03246	0.126783	1.27522	0.505098	-1.11051	0.052376	-1.41957
NM_029413 // Mm.490398 // brain| embryonic tissue| epididymis| extraembryonic tissue| e	NM_029413 // Morc4 // microrchidia 4 // X F1|X // 75746 /// ENSMUST00000033811 // Morc4	NM_029413	Morc4	4450.34	190.13	23.4069	4.13414e-12	-2.85535	4.23954e-06	-1.76839	0.773598	-1.0314	0.0368883	-1.2594	0.23446	-1.13755	0.89102	1.01483	0.00441833	-1.3806	0.0148639	-1.31257	0.392845	-1.0966	0.174334	-1.15912	4.7639e-25	13.1249	5.05901e-21	7.30911	2.77307e-23	9.99539	2.63608e-18	5.25392	0.414769	-1.09196	0.00179038	1.49481	0.00570244	1.42025	0.615612	-1.0555	0.134869	-1.17697	0.0291433	-1.31207
NM_001033420 // Mm.436572 // bone| bone marrow| brain| connective tissue| dorsal root g	NM_001033420 // Dock1 // dedicator of cytokinesis 1 // 7 F3|7 // 330662 /// ENSMUST0000	NM_001033420	Dock1	519.746	628.191	0.827369	1.32006e-20	-2.84973	1.83587e-11	-1.71236	0.00296156	-1.20089	0.236954	1.07182	0.00524736	1.18622	0.986708	-1.00097	0.00042835	-1.24892	0.340614	-1.05729	0.12049	-1.096	0.0900511	1.10559	0.196024	-1.07892	0.0128645	-1.16248	9.89117e-07	-1.39763	2.09295e-05	-1.3222	0.382454	1.05233	0.0813943	1.12307	0.0947366	1.11752	0.401639	-1.05018	0.194906	1.07913	0.0314532	1.1558
NM_177335 // Mm.119759 // brain| embryonic tissue| inner ear| intestine| ovary| testis|	NM_177335 // D930020B18Rik // RIKEN cDNA D930020B18 gene // 10 D2|10 // 216393 /// ENSM	NM_177335	D930020B18Rik	45.8076	31.5188	1.45334	1.80237e-12	-2.84911	4.97602e-10	-2.33744	2.03413e-05	-1.65062	0.051655	1.23074	0.409233	1.0901	0.592883	1.05734	0.657439	1.0473	0.481757	-1.07622	0.417691	1.0884	0.123933	1.17658	0.953356	-1.00611	0.146816	1.16543	0.743665	1.03465	0.429618	1.08604	0.709625	1.03955	0.389883	1.10632	0.0159211	1.34029	0.297743	1.11532	0.0733819	1.2096	0.953973	1.00677
ENSMUST00000037636 // Mm.276251 // brain| dorsal root ganglion| embryonic tissue| eye|	ENSMUST00000037636 // Ina // internexin neuronal intermediate filament protein, alpha /	ENSMUST00000037636	Ina	44.1047	1988.27	0.0221824	1.14792e-09	-2.8439	0.000262032	-1.69666	0.194485	1.18986	4.45189e-06	-2.01651	0.0151809	-1.39719	0.00261318	-1.52728	0.0358416	-1.33144	0.787844	-1.03633	0.132159	-1.22446	0.00047132	-1.65305	2.06548e-06	-2.08151	0.0154763	-1.39574	0.0104107	-1.42543	0.849317	-1.0255	0.881382	1.01997	0.27019	-1.17997	0.920585	-1.01496	0.0805214	1.26652	0.0210739	1.37237	0.773292	1.04385
ENSMUST00000022639 // Mm.1956 // brain| dorsal root ganglion| embryonic tissue| eye| mu	ENSMUST00000022639 // Nefl // neurofilament, light polypeptide // 14|14 D3 // 18039 ///	ENSMUST00000022639	Nefl	94.3163	351.427	0.268381	1.76025e-06	-2.84322	1.99128e-06	-2.82287	0.00022083	-2.13278	3.52594e-05	-2.38387	0.0205695	-1.56684	0.203705	-1.27185	1.78578e-06	-2.84084	2.08256e-05	-2.4597	0.000227661	-2.12876	6.60314e-07	-3.01014	0.00639873	-1.70927	0.109832	-1.35578	0.000180317	-2.15962	8.06954e-06	-2.60115	0.00477101	-1.74509	5.50672e-07	3.49058	1.25551e-10	6.11746	1.13655e-07	3.3348	9.88863e-09	3.84888	0.085652	-1.4457
ENSMUST00000015889 // Mm.458147 // bladder| bone| bone marrow| brain| embryonic tissue|	ENSMUST00000015889 // Plekho1 // pleckstrin homology domain containing, family O member	ENSMUST00000015889	Plekho1	348.041	135.093	2.57631	1.54393e-08	-2.83877	4.92721e-05	-1.95444	0.00331846	-1.58328	0.0209966	1.42374	0.0255217	1.40649	0.726522	1.0531	0.000575642	-1.7343	0.053371	-1.33993	0.000370543	-1.77283	0.0346428	-1.37922	0.00159388	1.64622	0.0104741	1.48442	0.684026	-1.06207	0.153535	-1.23834	0.00765247	-1.51152	0.704767	1.06501	0.984352	-1.00326	0.0171338	-1.4416	0.00217629	-1.61946	0.0941346	-1.32731
NM_172507 // Mm.100125 // bladder| bone| brain| connective tissue| embryonic tissue| ex	NM_172507 // Sh3bgrl2 // SH3 domain binding glutamic acid-rich protein like 2 // 9 E2|9	NM_172507	Sh3bgrl2	456.868	181.968	2.51071	1.15481e-11	-2.83458	1.15206e-05	-1.73806	0.185942	-1.15959	0.0506686	-1.24827	0.0490175	-1.25038	0.258399	-1.13443	0.78812	1.03021	0.0308269	-1.2794	0.410271	1.09586	0.484943	1.08063	0.447339	1.08808	0.124352	1.18854	0.0786596	-1.21969	0.000565887	-1.51121	0.100015	-1.20356	0.0190089	1.35307	0.00216349	1.50058	0.987875	1.00168	0.0803084	-1.21831	0.108514	-1.22503
ENSMUST00000020546 // Mm.32506 // blood| brain| embryonic tissue| eye| kidney| liver| l	ENSMUST00000020546 // Stc2 // stanniocalcin 2 // 11 A4|11 // 20856 /// NM_011491 // Stc	ENSMUST00000020546	Stc2	150.41	171.18	0.878665	1.42258e-11	-2.83295	7.32679e-10	-2.44794	3.12582e-07	-1.9778	0.000229462	1.56759	0.000543279	1.51797	0.00244485	1.4317	0.0208144	-1.30579	0.0247062	-1.29531	0.0680567	-1.23102	0.000421213	-1.53259	1.24456e-12	3.11385	1.63527e-08	2.19184	0.000592675	1.51298	0.814931	1.02644	0.612032	1.05826	2.71415e-10	2.84759	6.16352e-06	1.91568	0.0203154	1.30726	0.143544	-1.17978	0.999153	-1.00013
NM_133769 // Mm.154358 // adrenal gland| blood| bone| bone marrow| brain| dorsal root g	NM_133769 // Cyfip2 // cytoplasmic FMR1 interacting protein 2 // 11|11 B1.2 // 76884 //	NM_133769	Cyfip2	163.915	267.848	0.611972	1.26297e-13	-2.83031	1.51521e-10	-2.24132	0.00296749	-1.3463	0.228688	1.12157	0.0674767	1.19298	0.752649	1.03022	1.3497e-05	-1.59497	0.000446951	-1.43302	0.00611995	-1.31253	0.729332	-1.03324	2.13939e-05	1.57321	1.10688e-06	1.71707	0.0195038	-1.2568	9.45724e-07	-1.72501	1.75731e-06	-1.69393	8.22208e-08	2.00015	2.56896e-07	1.92627	0.0791495	1.18428	0.00599963	-1.31346	0.00116455	-1.44694
ENSMUST00000113516 // Mm.285 // bone marrow| brain| dorsal root ganglion| embryonic tis	ENSMUST00000113516 // Kdr // kinase insert domain protein receptor // 5 C3.3|5 42.0 cM	ENSMUST00000113516	Kdr	922.659	44.6476	20.6654	1.5782e-12	-2.82863	2.98494e-10	-2.35483	0.000759875	-1.45278	0.00259098	1.3897	3.36484e-05	1.61437	0.0068505	1.33899	0.0206913	-1.27958	0.548806	-1.06378	0.743333	-1.03429	0.0217524	-1.27682	0.514824	-1.06951	1.37571e-06	-1.78986	6.5888e-10	2.29309	0.49944	-1.07218	0.0342134	1.25151	8.51581e-08	-2.12572	0.00169188	-1.47315	0.754632	-1.0327	0.626722	-1.05139	0.670837	1.05042
NM_001142731 // Mm.329299 // bladder| brain| embryonic tissue| extraembryonic tissue| e	NM_001142731 // Kctd1 // potassium channel tetramerisation domain containing 1 // 18 A1	NM_001142731	Kctd1	400.87	68.1121	5.88544	4.10146e-14	-2.82214	0.000237935	-1.44011	0.92483	-1.0086	0.343719	-1.09022	0.294246	-1.10056	0.634631	-1.04411	0.0522978	1.19771	0.325795	1.09383	0.49422	-1.06417	0.330335	1.0929	4.18302e-08	-1.84381	2.73877e-11	-2.28684	0.092953	-1.16791	0.0666004	-1.18539	0.0197585	1.24493	2.65917e-12	-2.74906	2.71439e-08	-2.01633	2.00598e-07	-1.76381	0.530657	-1.05867	0.0485045	1.22906
NM_207255 // Mm.286232 // bone| bone marrow| brain| connective tissue| embryonic tissue	NM_207255 // Zfp532 // zinc finger protein 532 // 18 E1|18 // 328977 /// ENSMUST0000004	NM_207255	Zfp532	179.127	1060.99	0.16883	3.5121e-16	-2.81916	1.16515e-10	-1.9582	0.339183	-1.0777	0.000702299	1.32927	5.57092e-06	1.50146	0.029823	1.19051	3.8443e-09	-1.79255	1.28534e-06	-1.55583	4.61226e-09	-1.78448	2.38627e-09	-1.81394	2.35308e-09	-1.81457	0.0176458	-1.21122	0.0520425	-1.16763	0.512758	1.05241	0.060282	1.1614	0.692547	-1.03522	0.82153	-1.01993	1.38622e-05	1.4684	0.013168	1.2225	0.15017	1.13603
NM_133772 // Mm.6667 // bladder| blood| brain| embryonic tissue| extraembryonic tissue|	NM_133772 // Ssbp4 // single stranded DNA binding protein 4 // 8|8 // 76900 /// ENSMUST	NM_133772	Ssbp4	394.891	290.392	1.35985	4.5685e-13	-2.81638	3.3287e-05	-1.57974	0.000702394	-1.43183	0.0450305	1.22381	0.145834	1.15573	0.0603922	1.20758	0.163914	-1.1484	0.675614	-1.04198	0.137791	1.15925	0.405408	-1.08549	0.960632	-1.00486	0.116105	1.16968	0.812818	-1.02352	0.179486	1.1426	0.582959	1.05548	0.952731	1.00656	0.194274	1.15573	0.429156	-1.08104	0.574237	1.05681	0.912981	-1.01213
NM_009328 // Mm.3881 // bone| embryonic tissue| lung| mammary gland| blastocyst| organo	NM_009328 // Tcf15 // transcription factor 15 // 2 G3|2 83.9 cM // 21407 /// ENSMUST000	NM_009328	Tcf15	121.916	1662.57	0.0733298	7.64633e-12	-2.81446	4.56371e-12	-2.86945	1.08489e-05	-1.72098	0.0406574	1.25587	3.2038e-05	1.65833	0.0141851	1.31822	8.62051e-06	-1.73449	0.619108	1.0554	0.424295	1.09077	0.273157	-1.12704	0.369519	-1.10262	0.0361735	1.26298	3.22499e-09	2.26631	4.95894e-09	2.23291	0.0150137	1.31494	5.63693e-05	-1.72694	0.00136526	-1.51735	0.00261762	1.41338	0.236526	1.1381	0.0451035	1.28439
NM_026178 // Mm.277518 // blood| bone marrow| brain| connective tissue| dorsal root gan	NM_026178 // Mmd // monocyte to macrophage differentiation-associated // 11 C|11 // 674	NM_026178	Mmd	153.237	70.6222	2.16982	3.08154e-13	-2.81112	4.07927e-05	-1.55904	0.0024702	-1.36461	0.741881	1.03237	0.507415	1.06637	0.415967	1.08217	0.525281	1.0635	0.530179	1.06273	0.530786	1.06263	0.738135	1.03287	2.94802e-05	1.57472	0.000575054	1.43349	0.0526798	-1.21161	0.0168784	-1.27098	0.00426444	-1.33851	0.107539	1.19456	0.0299491	1.27528	0.00146486	-1.3894	0.0292849	-1.24279	0.166455	-1.16437
ENSMUST00000150779 // Mm.5077 // brain| dorsal root ganglion| embryonic tissue| eye| in	ENSMUST00000150779 // Msi1 // Musashi homolog 1(Drosophila) // 5 E3-F|5 // 17690 /// NM	ENSMUST00000150779	Msi1	47.0989	110.284	0.427069	7.7176e-15	-2.80473	2.54181e-09	-1.91862	2.72092e-07	-1.69236	5.4909e-07	-1.66113	0.00579468	-1.28109	0.65914	1.03843	0.0810567	1.1641	0.00735869	1.27115	0.00259884	1.31393	0.720371	1.03106	1.22698e-05	1.52922	2.60142e-07	1.69438	1.39764e-05	-1.52388	0.0004303	-1.38606	0.0420922	-1.1952	0.0227743	1.25361	7.60889e-06	1.63504	2.80182e-10	-2.03925	4.00655e-06	-1.57571	0.00710025	-1.31114
NM_029321 // Mm.37581 // bone marrow| brain| embryonic tissue| extraembryonic tissue| f	NM_029321 // Ttc32 // tetratricopeptide repeat domain 32 // 12|12 A1.3 // 75516 /// ENS	NM_029321	Ttc32	203.596	268.43	0.758469	2.17786e-07	-2.79858	0.00054716	-1.85533	0.122354	-1.29585	0.72357	-1.06021	0.843729	1.0331	0.626914	-1.08373	0.0643593	-1.3667	0.370978	-1.16013	0.097721	-1.32107	0.372335	-1.15964	0.180242	1.25097	0.39578	1.15132	0.0116856	1.54375	0.313101	1.1826	0.204907	1.23562	0.948549	-1.01205	0.837322	1.03885	0.00836377	1.57762	0.0565396	1.38059	0.0150187	1.59867
NM_183300 // Mm.196776 // bone| brain| embryonic tissue| eye| intestine| lung| molar| s	NM_183300 // Zfyve9 // zinc finger, FYVE domain containing 9 // 4 C7|4 // 230597 /// EN	NM_183300	Zfyve9	60.3564	225.676	0.267447	7.11903e-14	-2.77846	9.45081e-09	-1.92766	0.00448868	-1.31347	1.1658e-06	-1.68116	0.442319	-1.07269	0.545291	-1.05671	9.55079e-13	2.5491	1.63393e-16	3.45779	3.49169e-12	2.44521	1.31463e-15	3.19832	0.000490882	1.41032	0.0186258	1.24856	0.0004871	1.41066	0.629304	1.04497	0.438007	-1.07341	0.290131	-1.11509	0.0046931	1.35619	0.143434	-1.14452	0.273654	1.10559	0.344832	-1.10201
NM_009210 // Mm.209650 // bladder| blood| bone| bone marrow| brain| dorsal root ganglio	NM_009210 // Hltf // helicase-like transcription factor // 3 A2|3 12.0 cM // 20585 ///	NM_009210	Hltf	969.877	910.831	1.06483	7.89119e-18	-2.77612	8.91692e-14	-2.14128	0.047668	-1.14886	0.000242806	-1.31546	0.0391593	-1.15586	0.433799	-1.05514	3.73016e-06	-1.44086	0.000100153	-1.3418	0.00466006	-1.22598	0.00151323	-1.26059	1.34373e-05	-1.40187	0.629113	-1.03359	0.0257772	-1.17037	0.124222	-1.11252	0.729751	-1.02389	0.314178	-1.08085	0.0495342	1.16715	0.0877682	1.1262	0.160511	1.10196	0.922098	-1.00753
NM_175136 // Mm.29532 // bone marrow| brain| dorsal root ganglion| embryonic tissue| ey	NM_175136 // Rnf122 // ring finger protein 122 // 8 A3|8 // 68867 /// ENSMUST0000004694	NM_175136	Rnf122	159.09	356.567	0.44617	1.12355e-08	-2.77225	2.18968e-07	-2.42846	0.00399892	-1.54185	0.247233	-1.18087	0.368979	-1.13727	0.140123	1.23756	0.892104	-1.01951	0.440381	-1.11664	0.301562	1.15971	0.127157	-1.24681	0.385545	-1.13224	0.527451	1.09444	5.95018e-05	-1.89095	1.6142e-05	-2.00618	0.0713749	-1.29995	0.00353837	1.63841	3.18106e-05	2.11252	0.375672	-1.13522	0.307754	-1.1575	0.0252633	-1.44774
NM_201518 // Mm.341948 // brain| connective tissue| embryonic tissue| eye| heart| intes	NM_201518 // Flrt2 // fibronectin leucine rich transmembrane protein 2 // 12 E|12 // 39	NM_201518	Flrt2	24.6478	29.0958	0.847124	0.00474134	-2.77019	0.00190824	-3.10349	0.00297654	-2.93796	0.98692	1.00563	0.881607	-1.05231	0.855211	-1.06447	0.708349	-1.13675	0.843647	-1.06987	0.552057	-1.22635	0.717651	-1.13189	0.300236	-1.42918	0.357056	-1.37302	0.717681	-1.13187	0.953267	-1.02026	0.997636	-1.00101	0.413461	-1.37154	0.637412	-1.19907	0.82871	-1.0769	0.717354	1.13204	0.984225	1.00763
NR_033241 // Mm.27757 // adipose tissue| blood| bone| bone marrow| brain| dorsal root g	NR_033241 // Bmp1 // bone morphogenetic protein 1 // 14 D2|14 32.5 cM // 12153 /// NM_0	NR_033241	Bmp1	1985.88	183.668	10.8123	2.15404e-10	-2.76804	2.14605e-06	-1.94747	0.426278	-1.10127	0.720996	1.0441	0.737348	1.04136	0.764002	-1.03694	0.252307	-1.1496	0.373703	-1.11401	0.839019	-1.02484	0.698265	-1.04797	0.163295	-1.18587	0.108114	-1.21812	8.08015e-13	-3.48724	1.4211e-12	-3.40364	9.45814e-06	-1.84147	0.00078771	-1.6337	0.23687	-1.1758	1.71951e-10	-2.79297	3.59502e-06	-1.91003	0.615829	-1.07057
NM_001081103 // Mm.265985 // bone marrow| brain| embryonic tissue| extraembryonic tissu	NM_001081103 // Stim2 // stromal interaction molecule 2 // 5 C1|5 34.0 cM // 116873 ///	NM_001081103	Stim2	423.65	359.972	1.1769	2.14461e-17	-2.75958	6.03497e-14	-2.20391	5.6966e-05	-1.36883	2.22927e-09	-1.71073	0.000821589	-1.28677	0.556964	-1.04205	0.114894	-1.11865	0.848934	1.01342	0.958051	1.00369	0.500402	1.04843	0.0192086	-1.18511	0.0778902	-1.13416	0.11746	1.11774	0.154848	-1.10613	0.0173267	-1.18865	0.000155607	-1.387	0.0727859	-1.15495	0.774529	1.02026	0.45072	-1.0544	0.179582	-1.11267
NR_033520 // Mm.297552 // bone marrow| brain| embryonic tissue| eye| heart| liver| lung	NR_033520 // Tmem181b-ps // transmembrane protein 181B, pseudogene // 17 A1|17 // 54712	NR_033520	Tmem181b-ps	1089.14	295.928	3.68041	3.45967e-10	-2.75781	2.33817e-08	-2.33771	0.000427641	-1.59822	1.82608e-10	-2.82967	4.37656e-10	-2.73197	0.477002	-1.09139	1.57555e-06	-1.99046	1.83637e-05	-1.81149	0.975488	-1.00377	0.0799998	-1.24473	0.139793	1.2015	0.787052	1.03368	2.03847e-05	-1.80417	0.00348506	-1.46056	0.029444	1.31694	0.256623	1.17064	0.0388795	1.33979	1.18189e-09	-2.62618	0.000428189	-1.59814	0.59131	-1.0769
NM_019425 // Mm.312945 // bone marrow| brain| connective tissue| dorsal root ganglion|	NM_019425 // Gnpnat1 // glucosamine-phosphate N-acetyltransferase 1 // 14 C1|14 // 5434	NM_019425	Gnpnat1	1600.76	1633.44	0.979994	2.90278e-19	-2.74986	6.84213e-16	-2.2267	3.55479e-06	-1.38976	0.00055789	-1.25768	0.876761	-1.00956	0.899655	-1.00777	0.0326781	-1.14462	0.0473165	1.13304	0.0815643	-1.1152	0.864914	-1.0105	0.0707316	-1.11997	0.718877	-1.02236	0.200491	1.08265	0.000597549	1.25588	0.188223	1.0851	0.21014	-1.09123	0.60865	-1.036	0.0317629	1.14549	0.000259837	1.27763	0.109889	1.11862
NM_001204276 // Mm.384027 // adipose tissue| adrenal gland| bladder| bone| bone marrow|	NM_001204276 // Hdac7 // histone deacetylase 7 // 15|15 F2 // 56233 /// NM_001204275 //	NM_001204276	Hdac7	252.864	57.0265	4.43415	8.33236e-11	-2.74765	3.08954e-08	-2.20454	4.10578e-05	-1.70002	0.0350294	-1.28505	0.814633	1.02748	0.0235694	1.31073	0.000675764	-1.5283	0.00891653	-1.37181	0.18433	-1.16788	0.0129799	-1.34847	0.671948	1.05022	0.143282	-1.18712	6.05593e-05	-1.67572	3.33676e-09	-2.39133	0.00161025	-1.47595	0.150111	-1.20854	0.951971	1.00785	1.42283e-05	-1.76737	7.69101e-05	-1.66087	0.121674	-1.22647
NM_013508 // Mm.4454 // bladder| blood| bone marrow| brain| connective tissue| dorsal r	NM_013508 // Elk3 // ELK3, member of ETS oncogene family // 10 C-D1|10 51.0 cM // 13713	NM_013508	Elk3	428.744	117.346	3.65366	3.11669e-09	-2.74759	4.3753e-09	-2.70817	6.63231e-05	-1.80913	0.599736	1.07275	0.211075	1.18385	0.617922	1.06902	0.000263761	-1.70336	0.0213977	-1.37468	0.00726993	-1.45643	0.0607183	-1.29223	0.0366925	-1.33265	0.00184721	-1.55816	9.68884e-05	-1.77977	3.84162e-05	-1.85193	0.0263415	-1.35861	0.0191677	-1.43972	0.166834	-1.2338	0.0875709	-1.26188	0.774254	1.03908	0.446477	1.12154
NM_026681 // Mm.156217 // bladder| bone marrow| brain| embryonic tissue| eye| heart| in	NM_026681 // Ccdc88c // coiled-coil domain containing 88C // 12 E|12 // 68339 /// ENSMU	NM_026681	Ccdc88c	136.346	299.226	0.455663	2.3017e-16	-2.74658	5.22464e-10	-1.83984	0.00926996	-1.22594	0.0099045	-1.22356	0.350792	-1.07279	0.869274	1.0124	0.0369386	-1.17439	0.000996201	-1.30323	0.0243686	-1.19038	1.25396e-05	-1.45063	4.5771e-08	-1.6537	0.000264122	-1.34787	1.76972e-07	-1.60228	1.93185e-08	-1.68756	0.223809	-1.09634	0.261188	-1.10001	0.787465	1.02295	0.694685	1.02986	0.151256	-1.11507	0.988864	1.00118
NM_026599 // Mm.99961 // adrenal gland| bladder| blood| bone marrow| brain| embryonic t	NM_026599 // Cgnl1 // cingulin-like 1 // 9 D|9 // 68178 /// ENSMUST00000072899 // Cgnl1	NM_026599	Cgnl1	230.869	86.3905	2.67239	4.49372e-10	-2.73708	3.93401e-05	-1.76144	0.100524	-1.2281	0.166044	-1.18815	0.797565	-1.03205	0.343953	1.12414	0.037686	-1.30056	0.150718	-1.19607	0.822081	-1.02804	0.35957	1.1199	0.00413716	-1.45083	0.0331257	-1.30971	0.0244099	1.33109	0.208966	-1.16888	0.38393	-1.11356	1.72114e-05	-1.95886	0.0312364	-1.35893	0.8614	1.0217	0.205547	-1.17028	0.603486	-1.07451
NM_028924 // Mm.390521 // bladder| embryonic tissue| eye| intestine| mammary gland| nas	NM_028924 // Tc2n // tandem C2 domains, nuclear // 12|12 F1 // 74413 /// ENSMUST0000011	NM_028924	Tc2n	46.0913	159.096	0.289708	9.95358e-09	-2.73468	3.93715e-08	-2.57421	0.000138376	-1.79857	0.422939	-1.11905	0.918183	1.01446	0.642489	-1.06714	0.53117	-1.09172	0.128018	1.24107	0.211941	1.19275	0.422362	-1.11921	9.78619e-10	3.03315	2.78058e-11	3.57525	0.0405724	1.34207	0.00829599	1.47152	0.000480406	-1.69764	0.00372301	1.61864	8.64649e-07	2.48763	0.96065	-1.00692	0.0158011	1.41978	0.20242	-1.22425
NM_001081956 // Mm.116704 // bone marrow| brain| embryonic tissue| eye| fertilized ovum	NM_001081956 // Akap17b // A kinase (PRKA) anchor protein 17B // X A3.3|X // 338351 ///	NM_001081956	Akap17b	822.84	181.864	4.52447	1.59919e-11	-2.73303	2.00459e-09	-2.30023	0.000108499	-1.58794	2.40318e-10	-2.4779	0.00036909	-1.52014	0.285905	-1.12321	1.48066e-09	-2.32455	0.000224641	-1.54753	0.0131873	-1.32171	0.0806892	-1.21237	0.0239717	1.28696	0.000904696	1.47087	0.000221152	1.54839	0.000114944	1.58472	0.00861233	1.34597	0.257364	-1.14878	0.680922	1.05126	0.485572	1.07854	0.159737	1.1664	0.0100537	1.3861
NM_029478 // Mm.390398 // bladder| blood| bone| bone marrow| brain| connective tissue|	NM_029478 // Vmp1 // vacuole membrane protein 1 // 11 C|11 // 75909 /// ENSMUST00000018	NM_029478	Vmp1	1105.56	510.49	2.16568	4.15587e-11	-2.7312	2.18597e-10	-2.56757	5.9704e-06	-1.78951	0.000787312	-1.49907	9.5993e-06	-1.75995	0.40594	1.09792	0.150872	-1.17693	0.000838527	-1.49544	0.718999	1.04112	0.209166	-1.15255	0.00112803	-1.47835	0.000227414	-1.57088	0.000105098	-1.61597	1.28185e-05	-1.74213	0.0161317	-1.32265	0.0139467	-1.37939	0.0766612	-1.25507	0.000352443	-1.54547	0.00276119	-1.42667	0.0195235	-1.3557
ENSMUST00000096433 // Mm.295397 // adrenal gland| bone marrow| brain| embryonic tissue|	ENSMUST00000096433 // Deptor // DEP domain containing MTOR-interacting protein // 15 D1	ENSMUST00000096433	Deptor	476.394	599.672	0.794425	2.20334e-14	-2.72925	0.000212372	-1.41774	0.0650771	-1.17612	1.92155e-08	-1.8242	0.7646	-1.0261	0.0120376	1.25244	1.80437e-06	-1.61507	0.00206696	-1.32589	5.68586e-06	-1.5661	8.62099e-05	-1.45412	0.577845	1.04913	0.000180858	1.42421	0.327655	-1.0884	0.79268	-1.02287	0.760144	-1.02662	0.00626349	1.31981	6.78871e-08	1.89123	0.0229844	1.2242	0.00061425	1.37501	0.747008	1.03169
NM_001162909 // Mm.227456 // brain| embryonic tissue| extraembryonic tissue| eye| lung|	NM_001162909 // Ncrna00085 // non-protein coding RNA 85 // 17 A3.2|17 // 75202 /// ENSM	NM_001162909	Ncrna00085	224.368	103.657	2.16452	2.81964e-08	-2.72453	1.49472e-05	-2.04782	0.069224	-1.31113	0.128976	-1.25216	0.000156702	-1.83455	0.531739	1.09579	0.773755	1.04286	0.10826	-1.26911	0.318643	1.15772	0.558203	-1.0894	0.146597	-1.23954	0.00448529	-1.54857	0.158367	1.23184	0.231769	-1.19257	0.474407	-1.1104	0.000177506	-1.96423	0.436952	-1.13649	0.000690545	-1.70653	0.309346	-1.16106	0.0224207	-1.47304
NM_011204 // Mm.3414 // bladder| bone| bone marrow| brain| dorsal root ganglion| embryo	NM_011204 // Ptpn13 // protein tyrosine phosphatase, non-receptor type 13 // 5 E-F|5 56	NM_011204	Ptpn13	941.11	217.009	4.33674	1.72952e-10	-2.72374	1.71981e-05	-1.77463	0.84335	1.02356	0.847124	1.02298	0.182986	1.17201	0.484699	1.0861	0.617458	-1.06072	0.615699	1.06103	0.874004	-1.01886	0.326322	1.12342	2.82164e-09	2.44789	1.03341e-08	2.33174	1.15071e-07	2.13308	0.000419614	1.57065	0.318066	-1.1257	0.00789721	1.44542	0.000372776	1.66956	0.0830967	1.2315	0.422369	1.09958	0.290659	-1.15133
NM_028030 // Mm.29148 // adrenal gland| bladder| bone| bone marrow| brain| embryonic ti	NM_028030 // Rbpms2 // RNA binding protein with multiple splicing 2 // 9 C|9 // 71973 /	NM_028030	Rbpms2	2047.25	3201.65	0.639437	5.83876e-22	-2.72312	4.46045e-13	-1.71135	2.97228e-05	-1.26986	0.098872	-1.08925	0.577304	-1.02883	0.0453042	1.11024	4.58778e-05	-1.26094	2.01383e-05	-1.27786	0.300154	-1.05453	5.12407e-05	-1.25867	0.439035	1.04032	0.683468	-1.02099	0.643746	-1.02385	0.0047112	-1.16368	0.0227467	-1.1274	0.000242273	1.25807	0.0204627	1.14714	0.000102699	1.24439	0.253393	1.06037	0.240252	-1.0701
NM_023523 // Mm.281738 // bone marrow| brain| connective tissue| embryonic tissue| fert	NM_023523 // Pecr // peroxisomal trans-2-enoyl-CoA reductase // 1 C3|1 36.1 cM // 11117	NM_023523	Pecr	250.305	746.697	0.335217	7.3899e-13	-2.7209	1.46594e-07	-1.84586	8.40134e-05	-1.52309	0.748595	-1.03142	0.0187956	1.26491	0.222373	1.12621	0.783061	1.02693	4.64317e-07	1.78313	0.727965	1.03415	0.875602	-1.01522	0.0143799	-1.27836	0.714048	-1.03601	0.349081	-1.0951	0.752384	1.03092	0.0361687	1.23119	0.46868	-1.082	0.111646	1.1916	0.766944	1.02902	0.0500713	1.21387	0.143795	1.17429
NR_015585 // Mm.440257 // adrenal gland| bladder| brain| embryonic tissue| eye| kidney|	NR_015585 // 4933439C10Rik // RIKEN cDNA 4933439C10 gene // 11 B1.3|11 // 74476 /// BC0	NR_015585	4933439C10Rik	214.685	63.8166	3.36409	8.44445e-08	-2.71998	5.63907e-08	-2.77308	4.63923e-06	-2.24678	0.0415352	1.37866	0.332802	-1.16114	0.00500661	1.57343	0.958828	-1.00795	0.00945846	-1.51574	0.816825	1.03617	0.00269983	-1.62931	1.65613e-08	2.94142	0.000117962	1.91913	6.43242e-09	3.07938	0.00754937	1.53622	0.663576	-1.06906	0.593944	1.09639	0.965731	1.00743	0.211509	1.21352	0.301676	-1.17289	0.948615	-1.01117
NM_001012667 // Mm.378231 // bone marrow| brain| connective tissue| embryonic tissue| e	NM_001012667 // AI316807 // expressed sequence AI316807 // 8 A2|8 // 102032 /// ENSMUST	NM_001012667	AI316807	515.508	415.574	1.24047	3.36388e-10	-2.71717	6.86651e-08	-2.21469	3.35862e-06	-1.91382	0.00017786	1.6433	0.000104576	1.67806	0.012751	1.36749	0.646645	1.05694	0.844714	1.02392	0.760171	1.03754	0.863662	-1.02094	6.39348e-10	2.6494	5.82493e-07	2.04386	0.315915	-1.12951	0.477267	-1.08983	0.722345	-1.04384	3.54953e-07	2.27974	0.00976056	1.44199	0.656403	-1.05521	0.0786007	-1.24175	0.200442	1.19174
NM_026066 // Mm.41614 // brain| mammary gland| pituitary gland| skin| spinal cord| fetu	NM_026066 // Cmtm5 // CKLF-like MARVEL transmembrane domain containing 5 // 14 C3|14 //	NM_026066	Cmtm5	352.706	33.4182	10.5543	4.47624e-11	-2.71237	8.42116e-08	-2.06957	0.7502	-1.03614	0.722471	-1.04041	0.926773	-1.0103	0.360746	-1.10783	0.0386652	1.26739	0.133216	1.18507	0.124127	1.19008	0.0848527	1.21627	0.00897872	-1.356	0.00427745	-1.3993	0.467189	1.0847	0.784642	1.03094	0.705025	-1.04313	0.0288571	-1.32623	0.338913	-1.12801	0.596176	-1.06095	0.456277	1.08689	0.107629	-1.22739
NM_010942 // Mm.7414 // bone| bone marrow| brain| connective tissue| dorsal root gangli	NM_010942 // Nsg1 // neuron specific gene family member 1 // 5 B3|5 21.0 cM // 18196 //	NM_010942	Nsg1	58.1347	38.0918	1.52617	9.62475e-12	-2.71083	3.8718e-11	-2.57908	0.00190975	-1.41643	0.00578573	-1.35711	0.109073	-1.18705	0.350631	-1.10383	2.95887e-05	-1.6392	0.000263537	-1.52136	0.00140193	-1.43283	9.94861e-06	-1.6997	0.0440091	1.24314	0.0044948	1.37072	0.715135	-1.03919	0.0297954	1.26597	0.66113	-1.04727	0.334198	-1.12174	0.661759	1.05316	0.0162618	-1.30037	0.445381	1.08395	0.599922	1.0641
ENSMUST00000074752 // Mm.370338 // embryonic tissue /// BC119335 // Mm.370338 // embryo	ENSMUST00000074752 // Hist1h2ak // histone cluster 1, H2ak // 13 A2-A3|13 // 319169 ///	ENSMUST00000074752	Hist1h2ak	679.886	3415.07	0.199084	8.85019e-11	-2.70929	7.22449e-09	-2.30167	7.84064e-06	-1.79366	4.21772e-07	-1.99019	0.0211624	-1.31339	0.0998441	-1.21083	4.70175e-11	2.77552	4.81875e-15	4.05752	2.49159e-12	3.11421	1.6926e-07	2.05577	0.0973011	1.21265	0.0172949	1.32602	0.842426	-1.02297	0.565107	1.06807	0.453644	-1.0897	0.0792969	1.25832	0.0124608	1.39671	0.56158	-1.06871	0.745603	1.03778	0.199028	-1.18129
NM_011122 // Mm.37371 // adipose tissue| bladder| blood| bone| bone marrow| brain| conn	NM_011122 // Plod1 // procollagen-lysine, 2-oxoglutarate 5-dioxygenase 1 // 4 E2|4 76.5	NM_011122	Plod1	963.044	233.62	4.12227	2.53778e-11	-2.70895	7.48678e-07	-1.8911	0.0891725	-1.20773	0.108524	1.19463	0.416793	1.09293	0.519635	1.07289	0.955025	-1.00616	0.524694	-1.07197	0.996447	1.00049	0.870332	-1.01795	1.70817e-05	-1.70012	0.0191798	-1.30284	2.20983e-06	-1.82302	0.000459776	-1.51314	0.00657399	-1.36464	0.0835459	-1.24117	0.392346	-1.11096	0.0402348	-1.2583	0.0739965	-1.21992	0.0427616	-1.29021
NM_009810 // Mm.34405 // brain| dorsal root ganglion| embryonic tissue| extraembryonic	NM_009810 // Casp3 // caspase 3 // 8 B1.1|8 26.0 cM // 12367 /// ENSMUST00000093517 //	NM_009810	Casp3	439.553	405.891	1.08293	6.15575e-12	-2.69836	6.41458e-07	-1.83611	0.00633533	-1.34384	0.912102	1.01144	0.461028	1.07923	0.926245	-1.00959	0.283505	-1.11781	0.365033	-1.09841	0.0131989	-1.30469	0.95324	1.00606	8.20865e-06	-1.69176	0.000315518	-1.49901	0.0177385	-1.28862	4.10658e-06	-1.72997	0.172361	-1.15301	0.00878814	-1.37365	0.981302	1.00272	0.843668	-1.02054	0.26574	-1.12259	0.313786	-1.12461
NM_017401 // Mm.260194 // blood| brain| dorsal root ganglion| embryonic tissue| extraem	NM_017401 // Polm // polymerase (DNA directed), mu // 11 A1|11 // 54125 /// ENSMUST0000	NM_017401	Polm	297.096	128.502	2.31199	1.26967e-13	-2.6971	4.20376e-13	-2.59291	1.75258e-07	-1.76339	0.177858	-1.13064	0.766806	-1.02708	0.655504	1.04105	0.178856	-1.13032	0.273984	-1.10438	0.193375	-1.12573	0.0432093	-1.20563	0.00475698	1.30728	0.0329991	1.21873	0.00764432	1.28625	0.114135	1.1556	0.803828	1.02263	0.0996119	1.18484	0.150604	1.15884	0.0994978	1.163	0.311078	1.09619	0.843436	1.02019
NM_183276 // Mm.335481 // bone| bone marrow| brain| dorsal root ganglion| embryonic tis	NM_183276 // Nbeal2 // neurobeachin-like 2 // 9 F2|9 // 235627 /// ENSMUST00000167320 /	NM_183276	Nbeal2	150.329	95.5087	1.57398	3.6732e-13	-2.69581	8.75209e-11	-2.25817	0.000257005	-1.45182	1.50197e-06	-1.69114	0.103009	-1.16741	0.410382	-1.08021	2.98565e-06	-1.65773	0.0975878	-1.17043	0.0980305	-1.17018	0.0542856	-1.20198	4.09785e-06	-1.64252	0.0492094	-1.20709	0.763508	1.02849	0.0217766	-1.24805	0.689986	-1.03796	0.0254826	-1.27379	0.824536	1.02352	0.0124599	1.27497	0.596279	-1.05077	0.4662	-1.07967
NM_178081 // Mm.269793 // bladder| blood| bone| bone marrow| brain| connective tissue|	NM_178081 // Mfsd6 // major facilitator superfamily domain containing 6 // 1 C1.1|1 //	NM_178081	Mfsd6	123.99	57.4952	2.15653	4.30425e-12	-2.68942	1.12198e-11	-2.60066	0.000228231	-1.50566	0.184612	-1.1458	0.997746	-1.00029	0.808675	-1.02487	0.054822	1.2208	0.0102613	1.31241	0.39991	1.08956	0.0949047	1.18826	8.17636e-07	1.80447	0.0118854	1.30468	0.201305	1.13995	0.3981	-1.08992	0.7757	1.02934	5.93425e-07	1.9632	0.000743448	1.51367	0.045112	1.23197	0.582952	1.05738	0.845358	1.02248
NM_007453 // Mm.186185 // adipose tissue| bladder| bone| bone marrow| brain| connective	NM_007453 // Prdx6 // peroxiredoxin 6 // 1 H2.1|1 83.6 cM // 11758 /// AF004670 // Prdx	NM_007453	Prdx6	422.213	448.993	0.940354	1.08223e-12	-2.6894	4.03436e-07	-1.79223	0.00102795	-1.40584	5.80067e-08	-1.89992	1.46236e-05	-1.60842	0.960326	1.00482	0.18906	-1.13691	0.0262906	-1.24821	0.371428	-1.09068	0.00164828	-1.38355	2.58327e-06	-1.69503	1.70565e-08	-1.97171	0.231878	1.12365	0.00301093	-1.35493	0.3334	1.09858	0.000996419	-1.46802	0.0013975	-1.44933	0.778324	1.02758	0.0219486	-1.25748	0.204665	-1.14928
NM_022419 // Mm.276383 // blood| bone marrow| brain| dorsal root ganglion| embryonic ti	NM_022419 // Abhd8 // abhydrolase domain containing 8 // 8|8 C1 // 64296 /// ENSMUST000	NM_022419	Abhd8	97.6647	80.58	1.21202	1.24979e-08	-2.68531	0.0029774	-1.5472	0.462116	-1.10772	0.54387	-1.08801	0.102395	1.25912	0.0353266	1.35033	0.960363	1.00691	0.00541609	1.50039	0.544364	1.0879	0.633983	-1.06834	0.0307333	1.36181	0.453309	1.10998	0.314625	1.15065	0.0426257	-1.33471	0.280466	-1.16272	0.233875	1.20581	0.208942	1.21865	0.716611	1.05166	0.242107	-1.17776	0.446387	-1.12644
NM_133685 // Mm.29274 // bladder| blood| bone| bone marrow| brain| connective tissue| d	NM_133685 // Rab31 // RAB31, member RAS oncogene family // 17 E1.1|17 // 106572 /// ENS	NM_133685	Rab31	1437.28	580.974	2.47391	6.76666e-23	-2.68384	4.81515e-18	-2.04694	3.91003e-06	-1.28634	2.35311e-07	1.34053	1.23691e-07	1.35325	2.58282e-05	1.25078	0.934866	-1.00387	0.465973	-1.03515	0.692134	1.01889	0.10711	-1.08045	0.325556	-1.04782	0.282671	1.05244	0.000181553	-1.21419	0.0318243	-1.11011	0.298224	-1.05071	0.537871	-1.03331	0.070159	-1.10313	0.129135	-1.07544	0.00340585	-1.15757	0.278536	1.05964
NM_009397 // Mm.116683 // blood| bone| bone marrow| brain| connective tissue| embryonic	NM_009397 // Tnfaip3 // tumor necrosis factor, alpha-induced protein 3 // 10 A3|10 13.0	NM_009397	Tnfaip3	176.547	53.2268	3.31688	5.02233e-10	-2.67615	7.83065e-07	-2.02215	0.923567	-1.01165	2.24519e-05	-1.78152	1.16215e-05	-1.82679	0.0214672	-1.33295	0.623497	1.06115	0.565243	-1.07205	0.880858	-1.01826	0.32979	1.12566	3.06723e-06	1.9211	0.0222649	1.33048	0.0738589	1.24648	0.838819	-1.02486	0.0186859	-1.34228	0.537593	1.08743	0.434802	1.11221	0.0790045	-1.24153	0.555422	-1.07395	0.236698	-1.17582
NM_177545 // Mm.118004 // bladder| bone| bone marrow| brain| connective tissue| embryon	NM_177545 // Vangl1 // vang-like 1 (van gogh, Drosophila) // 3 F2.2|3 // 229658 /// NM_	NM_177545	Vangl1	458.298	414.053	1.10686	2.67934e-11	-2.67577	4.10413e-07	-1.91685	0.00141001	-1.4453	0.342465	1.10846	0.0406679	1.25466	0.00131402	1.44916	5.9443e-05	-1.61991	0.000185044	-1.55671	0.0040767	-1.38686	1.13902e-07	-2.00107	0.743194	-1.03599	2.23508e-05	-1.67534	0.335575	1.11012	0.000148777	-1.56877	0.991027	-1.00121	0.324119	1.12776	0.09248	1.23079	0.153925	1.1686	0.122537	1.18427	0.386393	-1.11123
ENSMUST00000074525 // Mm.133132 // bone| bone marrow| brain| embryonic tissue| eye| hea	ENSMUST00000074525 // Gulp1 // GULP, engulfment adaptor PTB domain containing 1 // 1|1	ENSMUST00000074525	Gulp1	187.885	153.186	1.22651	1.34424e-08	-2.67028	6.704e-08	-2.49044	0.00287222	-1.54833	0.441856	-1.11267	0.0671314	-1.29536	0.179296	-1.20672	0.557787	1.08463	0.38821	1.12739	0.0769791	1.28353	0.162828	1.21588	4.02266e-11	3.46685	2.7097e-07	2.34503	0.00228937	1.56599	0.483873	-1.102	4.40251e-05	-1.88121	1.02389e-05	2.18546	3.58238e-07	2.57067	0.321409	1.14798	0.295671	1.1568	0.00343849	-1.6177
NM_010362 // Mm.378931 // adipose tissue| bladder| blood| bone| bone marrow| brain| con	NM_010362 // Gsto1 // glutathione S-transferase omega 1 // 19 D1|19 // 14873 /// ENSMUS	NM_010362	Gsto1	3073.04	866.052	3.54833	1.09557e-16	-2.66894	1.09637e-11	-1.95563	0.010809	-1.20823	1.68762e-08	-1.64867	0.033108	-1.16894	0.613766	1.03661	0.08466	-1.13317	0.686402	1.02916	0.799771	-1.01821	0.895069	-1.00942	0.477897	1.05194	0.00288183	1.25198	0.0228967	-1.1822	0.735193	-1.02436	0.0551313	-1.14993	0.0359592	1.18825	0.19858	1.10942	0.301347	1.07682	0.721001	-1.02574	0.800872	-1.02037
NM_018825 // Mm.425294 // adipose tissue| bone marrow| brain| embryonic tissue| inner e	NM_018825 // Sh2b2 // SH2B adaptor protein 2 // 5|5 G1 // 23921 /// ENSMUST00000005188	NM_018825	Sh2b2	343.363	79.9591	4.29423	1.31457e-13	-2.66626	1.50041e-11	-2.29553	0.000150246	-1.45041	4.26539e-05	1.50399	0.031331	1.21868	0.487642	-1.06401	0.000289436	1.42271	0.00768782	1.28263	0.000122114	1.45919	0.0033158	1.31924	0.0182132	-1.24392	0.989821	1.00114	0.0421904	-1.20443	0.00540682	-1.29806	0.358261	1.08581	1.24018e-05	1.64508	1.79898e-08	2.01776	0.0108963	1.26715	0.105609	1.15801	0.0403997	-1.23486
ENSMUST00000021164 // Mm.33118 // bladder| bone| bone marrow| brain| connective tissue|	ENSMUST00000021164 // Fam64a // family with sequence similarity 64, member A // 11 B4|1	ENSMUST00000021164	Fam64a	343.181	193.133	1.77692	3.47536e-13	-2.66501	1.99448e-08	-1.90091	0.00018743	-1.45849	0.000415143	-1.42341	0.0151033	-1.26177	0.00075287	1.39718	0.0107144	-1.27785	0.00135192	-1.37131	0.151353	1.14323	0.00264479	-1.34146	8.15839e-09	1.95092	7.02881e-07	1.7161	0.00440887	1.3185	0.19346	-1.12866	0.0041598	-1.32112	1.86922e-05	1.65002	0.000102448	1.55967	0.271699	1.10736	0.019115	-1.25059	0.00837077	-1.3304
NM_001083945 // Mm.29830 // adipose tissue| bone marrow| brain| embryonic tissue| eye|	NM_001083945 // Rsph3b // radial spoke 3B homolog (Chlamydomonas) // 17 A1|17 // 100037	NM_001083945	Rsph3b	266.98	41.3418	6.45788	1.10426e-07	-2.66459	2.59765e-09	-3.18946	0.0453147	-1.36697	0.148608	1.2495	0.229311	1.20274	0.559686	1.09301	0.0963493	-1.29377	0.0350339	-1.39116	0.0134033	-1.47934	0.0776159	-1.31517	4.95056e-06	2.22568	0.000854667	1.72648	0.865347	1.02614	0.249102	-1.19345	0.177382	-1.23077	0.00112385	1.81735	0.00054474	1.8963	0.580035	-1.088	0.95018	1.00955	0.501952	-1.12199
NM_025705 // Mm.62982 // bone marrow| brain| embryonic tissue| eye| intestine| kidney|	NM_025705 // Dcbld1 // discoidin, CUB and LCCL domain containing 1 // 10 B3|10 // 66686	NM_025705	Dcbld1	171.2	610.239	0.280546	1.94283e-11	-2.65787	8.93858e-08	-1.99135	0.00217211	-1.41235	6.16365e-07	-1.86871	0.0106909	-1.32575	0.628302	-1.05266	0.000245674	-1.52877	0.0129536	-1.31507	0.302758	-1.11608	0.55315	-1.06493	8.09819e-07	-1.85201	4.09727e-06	-1.7557	1.07745e-05	-1.70032	4.57794e-05	-1.61978	0.648615	1.04948	0.152227	-1.18833	0.227307	-1.15597	0.143671	-1.16991	0.209463	-1.14362	0.856263	-1.02178
NM_011111 // Mm.271870 // blood| bone marrow| brain| connective tissue| embryonic tissu	NM_011111 // Serpinb2 // serine (or cysteine) peptidase inhibitor, clade B, member 2 //	NM_011111	Serpinb2	23.6964	21.8538	1.08432	0.00114807	-2.65748	0.0016067	-2.57105	0.000417821	-2.92795	0.938423	1.02189	0.890477	-1.03935	0.755493	-1.09126	0.965609	1.01216	0.904857	-1.03407	0.869313	-1.0472	0.880931	-1.04288	0.945199	-1.01945	0.730586	1.1014	0.912449	-1.0313	0.928808	-1.02536	0.778367	-1.08212	0.944924	-1.02199	0.762905	-1.09972	0.864581	1.04897	0.629121	-1.14518	0.99444	1.0022
NM_144804 // Mm.288805 // bladder| bone marrow| connective tissue| embryonic tissue| ep	NM_144804 // Depdc7 // DEP domain containing 7 // 2 E2|2 // 211896 /// ENSMUST000000285	NM_144804	Depdc7	92.691	485.168	0.191049	4.83325e-12	-2.65666	6.48417e-09	-2.0908	0.00199665	-1.39255	0.804675	1.0252	0.0302344	1.25203	0.178716	1.14666	1.63595e-11	2.54689	2.79993e-12	2.70804	1.46631e-09	2.1931	2.09622e-12	2.73586	0.213874	1.1346	0.826625	-1.02228	1.02798e-09	2.21851	1.85108e-05	1.62792	0.102424	1.18193	0.000199585	-1.58567	0.00109985	-1.4856	0.0830279	1.19458	0.418202	1.08521	0.235155	1.145
ENSMUST00000019862 // Mm.286120 // bladder| brain| connective tissue| embryonic tissue|	ENSMUST00000019862 // 2810055F11Rik // RIKEN cDNA 2810055F11 gene // 12 C3|12 // 67217	ENSMUST00000019862	2810055F11Rik	116.8	93.5782	1.24815	2.20394e-05	-2.65177	0.0169213	-1.65674	0.0793078	-1.43984	0.189439	-1.31023	0.669835	-1.09081	0.460523	1.16276	0.00884196	-1.74657	0.124247	-1.37417	0.399722	-1.18798	0.0341507	-1.55918	0.148322	-1.34764	0.092838	-1.41702	0.508083	-1.1447	0.0406046	-1.53494	0.269044	1.25463	0.220999	1.32676	0.162527	-1.3821	0.0831508	1.43301	0.0202516	-1.63186	0.539652	1.15104
NM_001205369 // Mm.292109 // adrenal gland| bone marrow| brain| dorsal root ganglion| e	NM_001205369 // Casc4 // cancer susceptibility candidate 4 // 2 E5|2 // 319996 /// ENSM	NM_001205369	Casc4	585.78	946.96	0.61859	1.68122e-13	-2.65025	1.99878e-06	-1.6404	0.00564744	-1.29687	1.20482e-06	-1.66362	0.0787809	-1.17372	0.124336	-1.14956	0.319908	-1.09352	0.0265408	1.22702	0.143726	1.14157	0.00163996	1.35022	0.637232	1.04308	0.442162	-1.07133	0.0805218	-1.1726	0.00296665	-1.32481	0.395661	-1.07919	0.250603	1.12331	0.0383229	1.23834	0.684456	-1.037	0.574952	1.05146	0.78468	-1.02781
NR_033520 // Mm.297552 // bone marrow| brain| embryonic tissue| eye| heart| liver| lung	NR_033520 // Tmem181b-ps // transmembrane protein 181B, pseudogene // 17 A1|17 // 54712	NR_033520	Tmem181b-ps	114.886	51.2152	2.24321	4.85539e-13	-2.65009	3.16456e-12	-2.49172	6.7727e-06	-1.61252	1.07038e-11	-2.39624	1.48918e-09	-2.05928	0.00672873	-1.30122	8.57838e-09	-1.95549	2.26201e-05	-1.55682	0.0586487	-1.19624	0.646099	-1.04349	0.0370036	1.21977	0.702528	-1.03602	0.1653	-1.1389	0.0224083	-1.2445	0.738633	-1.03139	0.354015	1.1018	0.314601	1.11104	0.00190104	-1.35853	0.104983	-1.16495	0.313502	-1.11131
NM_146239 // Mm.490399 // adipose tissue| bladder| bone| bone marrow| brain| embryonic	NM_146239 // Cdk17 // cyclin-dependent kinase 17 // 10 C2|10 // 237459 /// ENSMUST00000	NM_146239	Cdk17	635.422	542.478	1.17133	5.64265e-13	-2.64912	2.8527e-09	-2.02673	0.000704049	-1.4051	0.505122	1.06415	0.15866	1.14205	0.495821	-1.06561	0.0819318	-1.17944	0.0781903	-1.18197	0.000585193	-1.41336	0.105423	-1.16557	0.705622	1.0358	0.550969	-1.05717	0.049426	-1.20616	0.0102802	-1.28309	0.196315	-1.1292	0.706393	1.0402	0.216118	1.13948	0.30089	-1.10175	0.803108	1.02347	0.736442	-1.03583
NM_013632 // Mm.17932 // blood| bone| bone marrow| brain| dorsal root ganglion| embryon	NM_013632 // Pnp // purine-nucleoside phosphorylase // 14 B-C1|14 19.5 cM // 18950 ///	NM_013632	Pnp	75.3931	81.1922	0.928575	3.83033e-05	-2.6485	6.48063e-05	-2.55592	0.0216587	-1.65168	0.00420808	-1.89218	0.0690733	-1.48014	0.0027209	-1.95715	0.088339	-1.44288	0.168218	1.34246	0.0698333	-1.47849	0.229355	1.29194	0.168195	-1.34248	0.333956	-1.22777	0.939708	-1.0161	0.386974	-1.20144	0.301068	1.24587	0.773487	-1.07069	0.821885	1.05487	0.758708	1.06704	0.73944	-1.07279	0.753704	1.07731
NM_009021 // Mm.296366 // bone marrow| brain| embryonic tissue| extraembryonic tissue|	NM_009021 // Rai1 // retinoic acid induced 1 // 11|11 B2 // 19377 /// NM_001037764 // R	NM_009021	Rai1	247.468	161.521	1.53211	2.34474e-15	-2.6473	6.13602e-14	-2.40081	0.000121965	-1.38963	0.577292	1.04429	0.427594	1.06376	0.731548	-1.027	4.23155e-08	-1.68729	0.0193045	-1.20704	0.796252	1.02025	0.0634271	-1.1587	0.790816	-1.0208	0.366269	-1.07302	0.223262	1.10012	0.377859	-1.07119	0.0701895	-1.15435	0.106766	-1.15376	0.0153589	1.24561	0.00213893	-1.28858	0.94656	-1.00521	0.000120458	-1.44783
NM_009630 // Mm.333734 // bone marrow| brain| embryonic tissue| eye| inner ear| joint|	NM_009630 // Adora2a // adenosine A2a receptor // 10 B5.3|10 // 11540 /// ENSMUST000001	NM_009630	Adora2a	49.0976	32.1679	1.52629	5.66041e-09	-2.64725	1.21848e-10	-3.11958	4.37859e-07	-2.21166	0.13458	-1.22188	0.15686	-1.20841	0.673567	-1.05724	0.0131066	-1.40627	0.00126603	-1.57741	0.017899	-1.38293	0.000370758	-1.66734	0.102267	1.24539	0.109049	1.23995	0.0445737	1.31285	0.546147	1.08312	0.456174	1.10374	0.551813	-1.09248	0.238313	1.193	0.171229	-1.20058	0.424404	-1.11168	0.744303	-1.04959
NM_172803 // Mm.341423 // brain| embryonic tissue| eye| fertilized ovum| heart| liver|	NM_172803 // Dock4 // dedicator of cytokinesis 4 // 12 B1|12 21.0 cM // 238130 /// ENSM	NM_172803	Dock4	205.231	131.718	1.55811	4.96262e-14	-2.63922	2.33858e-10	-2.04947	0.00662732	-1.27549	2.59825e-15	2.90883	8.46184e-16	3.02292	4.42006e-08	1.77616	0.00052853	-1.37782	0.184496	-1.12143	1.01947e-05	-1.53679	0.00319345	-1.30552	5.0836e-06	-1.56567	0.641126	-1.04066	5.65169e-08	-1.76454	4.88513e-07	-1.66621	0.97034	-1.00318	0.195561	1.13375	2.12213e-06	1.69871	0.635756	-1.04133	0.881614	1.0128	0.605565	-1.05088
NM_207221 // Mm.23846 // adrenal gland| bladder| bone marrow| brain| embryonic tissue|	NM_207221 // Jmjd1c // jumonji domain containing 1C // 10 B5.1|10 // 108829 /// NM_0012	NM_207221	Jmjd1c	1148.91	1578.24	0.727972	2.61352e-21	-2.63868	2.75924e-19	-2.33662	1.77661e-08	-1.43428	0.140369	1.07993	0.0306452	1.12143	0.272541	-1.05851	0.000142506	-1.2404	0.00308207	-1.17495	0.000633501	-1.20907	0.0355183	-1.1177	0.092888	-1.092	0.00158735	1.18943	7.53123e-05	1.25368	0.000894085	1.20175	0.282644	1.05724	3.31648e-05	-1.30894	0.17542	-1.08245	0.488042	1.03641	0.13478	-1.08115	0.422301	1.04766
NM_133983 // Mm.5356 // brain| connective tissue| embryonic tissue| eye| intestine| joi	NM_133983 // Cd276 // CD276 antigen // 9 B|9 // 102657 /// ENSMUST00000039788 // Cd276	NM_133983	Cd276	649.12	693.379	0.936169	1.42153e-12	-2.63798	5.21904e-08	-1.89355	0.00957029	-1.29557	0.222858	-1.12491	0.921595	-1.00946	0.155923	1.14738	0.455557	-1.07424	0.432119	-1.07834	0.914233	1.01035	0.0801108	-1.18617	0.000549199	-1.43009	3.23873e-05	-1.56258	0.000955312	-1.40439	2.74525e-07	-1.80214	0.00558033	-1.32153	0.19763	-1.1502	0.0683112	-1.22161	0.927638	1.00872	0.0312497	-1.23655	0.172695	-1.15986
NM_022723 // Mm.40393 // adrenal gland| bone| brain| embryonic tissue| eye| heart| kidn	NM_022723 // Scube1 // signal peptide, CUB domain, EGF-like 1 // 15 E1|15 // 64706 ///	NM_022723	Scube1	38.0655	36.4885	1.04322	1.64865e-07	-2.63582	1.61182e-06	-2.36431	0.000187596	-1.87561	0.160176	-1.2439	0.23756	-1.20063	0.0942969	-1.29876	0.793616	1.04097	0.089004	1.30457	0.330545	-1.16206	0.279367	1.18202	0.824236	1.03467	0.658203	1.07032	0.751577	-1.0498	0.695019	1.06206	0.868977	-1.02563	0.544325	1.11044	0.270245	1.21113	0.290721	-1.17735	0.991973	-1.00154	0.226091	-1.23449
NM_145443 // Mm.103362 // bone| bone marrow| brain| connective tissue| embryonic tissue	NM_145443 // L2hgdh // L-2-hydroxyglutarate dehydrogenase // 12 C2|12 // 217666 /// ENS	NM_145443	L2hgdh	166.918	354.654	0.470648	1.21726e-11	-2.63564	1.00807e-06	-1.81047	0.00086077	-1.44775	0.00146394	-1.42039	0.00250107	-1.3927	0.18769	-1.14732	0.000292565	1.50333	0.0646426	1.21517	0.440373	1.08317	0.697294	1.04098	0.0173661	-1.29001	0.228949	-1.13345	0.975107	1.00322	0.340558	1.10394	0.0837173	1.1995	0.173747	-1.17299	0.339376	1.11783	0.790866	-1.02774	0.047366	1.23351	0.628055	1.05784
NM_178143 // Mm.48638 // bladder| brain| embryonic tissue| extraembryonic tissue| eye|	NM_178143 // Prkaa2 // protein kinase, AMP-activated, alpha 2 catalytic subunit // 4 C6	NM_178143	Prkaa2	272.118	560.982	0.485074	1.42561e-06	-2.63009	0.353796	-1.17313	0.814768	1.04095	2.42441e-10	-4.20889	8.48201e-05	-2.10929	0.112462	-1.31824	0.000272139	-1.97576	0.670943	-1.07556	0.388279	-1.16004	0.666275	1.07674	0.00800735	1.60896	0.00042016	1.92724	0.572893	-1.10158	0.870665	1.02828	0.944208	-1.01206	0.300374	1.22221	0.0349249	1.51865	0.765056	-1.05254	0.521433	1.11637	0.114684	1.36136
NM_016701 // Mm.331129 // bone marrow| brain| dorsal root ganglion| embryonic tissue| e	NM_016701 // Nes // nestin // 3 F1|3 42.5 cM // 18008 /// ENSMUST00000090973 // Nes //	NM_016701	Nes	258.261	125.385	2.05974	2.89772e-09	-2.6224	0.00130366	-1.54863	0.291425	-1.14453	0.0016346	-1.53304	0.883711	-1.01876	0.770708	1.03774	5.95317e-07	-2.12089	0.00162354	-1.53351	3.36505e-05	-1.80644	2.09022e-05	-1.84148	0.00191179	-1.52225	0.00684155	-1.43404	3.35593e-09	-2.60682	4.77369e-12	-3.43689	9.62798e-13	-3.69188	0.00135144	-1.63172	1.75366e-05	-2.00164	0.000164978	-1.69239	2.39908e-10	-2.90549	1.46925e-06	-2.23603
NM_010221 // Mm.3894 // adipose tissue| bladder| bone| bone marrow| brain| connective t	NM_010221 // Fkbp10 // FK506 binding protein 10 // 11 D|11 58.0 cM // 14230 /// NM_0011	NM_010221	Fkbp10	565.47	546.258	1.03517	1.79949e-06	-2.61987	0.000433654	-1.93499	0.00782009	-1.61835	0.0804444	-1.36084	0.266136	-1.2137	0.497624	-1.12471	0.65235	1.08105	0.3392	1.1807	0.144849	1.29098	0.122383	1.31138	0.00111541	-1.82988	0.0593887	-1.39566	0.00169249	-1.78417	0.0267419	-1.48472	0.229573	-1.2331	0.221495	-1.2708	0.285669	-1.2322	0.795618	-1.04579	0.559371	-1.10637	0.836976	-1.04076
ENSMUST00000041370 // Mm.371732 // adipose tissue| bladder| bone marrow| brain| connect	ENSMUST00000041370 // Txlng // taxilin gamma // X F4|X // 353170 /// NM_178935 // Txlng	ENSMUST00000041370	Txlng	103.626	210.266	0.492832	0.000128851	-2.61582	0.00595213	-1.93152	0.13286	-1.41526	0.52991	-1.1542	0.00155292	-2.15982	0.69745	1.09266	0.0395147	-1.61931	0.000246052	-2.49217	0.885737	1.03327	0.198846	-1.34412	0.0040693	-1.99524	0.0037754	-2.00787	0.840719	1.04684	0.0615013	-1.54595	0.772434	1.06811	0.877175	-1.04034	0.707709	1.10078	0.365812	1.23002	0.561529	-1.14168	0.103325	-1.52816
NM_198193 // Mm.439724 // embryonic tissue| eye| liver| ovary|oocyte| organogenesis| fe	NM_198193 // Raet1e // retinoic acid early transcript 1E // 10 A3|10 // 379043 /// ENSM	NM_198193	Raet1e	177.591	86.4042	2.05535	7.42552e-09	-2.60732	4.93752e-06	-1.99667	0.000627788	-1.62547	0.0837562	-1.26088	0.69436	1.05307	0.998416	1.00026	0.752246	1.0424	0.000163193	1.72452	0.837094	1.02741	0.911018	1.0148	0.909347	1.01508	0.0367364	1.32648	0.016741	1.38615	4.38253e-07	2.2046	0.0104808	1.42089	0.767597	-1.04464	0.100809	1.27976	0.686095	1.05463	0.000183022	1.716	0.357779	1.14635
NM_016972 // Mm.276831 // bone| bone marrow| brain| embryonic tissue| extraembryonic ti	NM_016972 // Slc7a8 // solute carrier family 7 (cationic amino acid transporter, y+ sys	NM_016972	Slc7a8	166.469	42.2975	3.93568	6.66453e-07	-2.60676	0.000107942	-2.00782	0.0615896	-1.36538	0.0345154	-1.42544	0.0241511	-1.46172	0.110465	-1.30249	0.094839	1.31919	0.006842	1.58746	6.11865e-07	2.61806	6.95137e-09	3.28893	0.810093	-1.03993	0.0731532	-1.34714	0.331651	1.17242	0.015024	-1.50937	0.0136969	-1.51859	0.405547	-1.16519	0.721915	-1.06735	0.413241	-1.14319	0.0328402	-1.43052	0.00217078	-1.81656
ENSMUST00000015498 // Mm.46016 // bone marrow| brain| connective tissue| embryonic tiss	ENSMUST00000015498 // Pcolce2 // procollagen C-endopeptidase enhancer 2 // 9 E3.3|9 //	ENSMUST00000015498	Pcolce2	160.952	425.487	0.378277	3.16231e-09	-2.60311	7.06652e-05	-1.74878	0.178114	-1.18815	2.09225e-05	-1.83692	0.725066	-1.04554	0.301505	-1.1407	0.226934	1.16689	0.00205256	1.51483	0.852314	1.02384	0.966703	1.0053	0.391533	1.11508	0.4021	1.11238	0.00516587	1.45141	0.145633	1.20523	0.37736	-1.1188	0.135746	-1.24009	0.449193	-1.11403	0.130646	1.21424	0.354207	1.12511	0.814141	1.034
NM_016920 // Mm.340818 // blood| bone| bone marrow| brain| connective tissue| embryonic	NM_016920 // Atp6v0a1 // ATPase, H+ transporting, lysosomal V0 subunit A1 // 11 D|11 55	NM_016920	Atp6v0a1	623.419	264.58	2.35626	4.09002e-10	-2.6017	1.6642e-05	-1.76361	0.189872	-1.1667	0.572999	-1.06789	0.743836	1.03876	0.841634	-1.02352	0.00334755	-1.43498	0.0358552	-1.28556	0.218661	-1.15543	0.990806	-1.00134	0.00034564	1.57335	0.194894	1.16464	0.13328	1.19385	0.0130406	-1.35075	0.534963	-1.07502	0.00100001	1.58723	0.00421075	1.48399	0.00713926	1.38838	0.472457	1.08746	0.593756	1.07233
NM_008981 // Mm.431266 // bone| bone marrow| brain| dorsal root ganglion| embryonic tis	NM_008981 // Ptprg // protein tyrosine phosphatase, receptor type, G // 14 A2|14 2.0 cM	NM_008981	Ptprg	327.312	425.487	0.769265	4.28821e-14	-2.59982	5.14847e-11	-2.10662	0.00285878	-1.30289	0.29928	-1.09138	0.0140921	1.23818	0.416395	1.07066	4.6586e-08	-1.75322	0.00427498	-1.28688	4.81865e-05	-1.46202	4.07162e-05	-1.46862	0.220395	-1.10907	0.859998	1.01487	0.514312	1.05623	0.941172	-1.00619	0.602428	1.04462	7.06647e-06	-1.62231	0.101733	-1.16944	0.000482423	-1.37246	0.0496002	-1.18345	0.575938	1.05409
NM_178061 // Mm.32968 // bone marrow| brain| embryonic tissue| inner ear| liver| lung|	NM_178061 // Mob3b // MOB kinase activator 3B // 4 A5|4 42.6 cM // 214944 /// ENSMUST00	NM_178061	Mob3b	370.042	113.062	3.27291	5.45672e-07	-2.59687	0.00474019	-1.61248	0.601718	-1.08755	0.189621	1.23728	0.259156	1.20036	0.393398	-1.14756	0.378691	-1.15259	0.719872	-1.0593	0.017335	-1.48645	0.423751	-1.13761	0.000741329	1.79325	0.0198856	1.47295	0.0125382	1.51812	0.0316149	-1.42698	0.245459	-1.20691	0.726053	-1.06528	0.33103	1.1929	0.170093	-1.24972	0.00115211	-1.74992	0.318199	-1.19864
NM_028295 // Mm.71015 // blood| bone| bone marrow| brain| embryonic tissue| extraembryo	NM_028295 // Pdia5 // protein disulfide isomerase associated 5 // 16 B3|16 // 72599 ///	NM_028295	Pdia5	736.039	606.894	1.2128	6.41455e-19	-2.59575	1.81861e-16	-2.2368	7.86942e-05	-1.29642	0.308932	-1.06255	0.118813	-1.09842	0.0236775	-1.14864	0.041563	1.13205	0.0684873	1.11659	0.373582	1.05441	0.0113103	1.16941	2.09111e-08	1.51051	0.0463143	1.12877	0.0193262	1.15445	0.0656583	-1.11792	0.637102	-1.02838	0.00448821	1.22075	0.00144166	1.25458	0.00801339	-1.1788	0.0943041	-1.1062	0.0701964	-1.13102
NM_029585 // Mm.250541 // bone marrow| brain| embryonic tissue| eye| fertilized ovum| h	NM_029585 // Det1 // de-etiolated homolog 1 (Arabidopsis) // 7|7 D2 // 76375 /// ENSMUS	NM_029585	Det1	161.241	217.485	0.741392	4.74476e-15	-2.594	1.88296e-08	-1.72215	0.055357	-1.16473	0.515698	-1.05195	0.168909	1.11429	0.78159	1.02179	0.00925358	-1.23543	0.793057	1.0206	0.191213	-1.10814	0.861035	1.0137	0.299313	1.0846	0.0178894	1.2103	0.0562303	-1.16406	0.54008	1.04888	0.74073	-1.02606	0.00559228	1.28974	0.00940437	1.26744	0.14297	1.12234	0.0195877	1.20677	0.435324	1.07077
NM_197996 // Mm.416781 // brain| dorsal root ganglion| embryonic tissue| epididymis| ey	NM_197996 // Tspan15 // tetraspanin 15 // 10 B4|10 // 70423 /// ENSMUST00000047883 // T	NM_197996	Tspan15	105.081	131.08	0.801655	1.3372e-10	-2.59376	2.13959e-09	-2.34654	0.00360034	-1.40724	0.313717	-1.11911	0.662055	-1.04976	0.173505	1.16516	0.00388857	-1.40281	0.000676346	-1.50268	0.0804051	-1.21886	0.0136603	-1.3295	0.668009	-1.0488	0.272279	1.13064	0.0476445	-1.25292	0.170961	-1.16625	0.273266	-1.13035	0.727868	1.04438	0.137205	1.20684	0.276226	-1.12948	0.495163	-1.07888	0.38058	-1.11614
NM_001081328 // Mm.84007 // embryonic tissue| lymph node| testis| fetus| juvenile| adul	NM_001081328 // Chsy3 // chondroitin sulfate synthase 3 // 18 D3|18 // 78923 /// ENSMUS	NM_001081328	Chsy3	97.4508	38.2914	2.54498	9.99042e-11	-2.59204	5.30929e-07	-1.92108	0.0161646	-1.31514	0.00822282	-1.35448	0.0364068	-1.26631	0.0724989	-1.22278	0.0985317	-1.2025	0.701666	-1.04294	0.00533179	-1.37928	0.186832	-1.15766	0.991997	1.0011	0.0935594	1.20597	0.301135	-1.12095	0.0613196	1.23359	0.818642	-1.02547	0.66146	-1.05551	0.0681752	1.25816	0.00334774	-1.40568	0.461283	1.08445	0.116773	-1.21698
ENSMUST00000106026 // Mm.245648 // bone marrow| brain| embryonic tissue| lung| mammary	ENSMUST00000106026 // 2210404O09Rik // RIKEN cDNA 2210404O09 gene // 17 A3.2|17 // 7008	ENSMUST00000106026	2210404O09Rik	99.0807	96.2777	1.02911	0.00535788	-2.59076	0.00124821	-3.07506	0.112385	-1.68915	0.309223	-1.39449	0.804723	-1.08366	0.374639	-1.33625	0.338438	-1.36725	0.131642	-1.64384	0.0131382	-2.31352	0.637934	1.16542	0.494867	-1.24907	0.951592	-1.01992	0.106648	-1.70414	0.396549	1.31874	0.682271	-1.14239	0.550769	-1.2439	0.975545	-1.01125	0.19529	-1.53004	0.235568	1.47526	0.93559	-1.02994
NM_007910 // Mm.16332 // brain| embryonic tissue| epididymis| extraembryonic tissue| ey	NM_007910 // Efna4 // ephrin A4 // 3 F1|3 48.0 cM // 13639 /// ENSMUST00000029674 // Ef	NM_007910	Efna4	512.329	279.406	1.83364	1.08255e-09	-2.58999	7.39656e-05	-1.69892	0.830141	-1.02617	0.771515	1.0356	0.688888	1.04943	0.269614	-1.14333	0.134136	-1.20079	0.133793	-1.20099	0.157136	-1.18832	0.0295221	-1.31029	0.0987242	1.22423	0.0687378	-1.25094	0.938897	-1.00927	0.000107158	-1.67454	0.00011137	-1.67202	0.0994752	1.25458	0.248303	-1.17059	0.178333	1.17814	0.0162475	-1.3505	0.00973595	-1.44102
NM_001166065 // Mm.483490 // bone marrow| eye| liver| mammary gland| ovary| testis|oocy	NM_001166065 // Gcnt4 // glucosaminyl (N-acetyl) transferase 4, core 2 (beta-1,6-N-acet	NM_001166065	Gcnt4	92.5916	34.3443	2.69598	6.13696e-09	-2.58823	1.4559e-06	-2.0746	0.00158611	-1.54732	0.000887668	1.58842	0.012311	1.40137	0.460524	-1.10056	0.0332895	1.32801	0.000166198	1.70839	0.00284258	1.50605	0.000348778	1.65497	0.153438	1.20581	0.246663	1.16323	0.519611	-1.08713	0.488663	-1.09403	0.407032	-1.11377	0.297561	1.16475	0.147325	1.23807	0.509384	-1.08938	0.968746	1.00508	0.60573	-1.07807
NM_020007 // Mm.255723 // adrenal gland| bladder| blood| bone| bone marrow| brain| conn	NM_020007 // Mbnl1 // muscleblind-like 1 (Drosophila) // 3 E1|3 // 56758 /// NM_0012537	NM_020007	Mbnl1	250.149	178.912	1.39816	1.36214e-10	-2.586	5.51405e-06	-1.78327	0.0283149	-1.28468	0.000644533	-1.50393	0.0497614	-1.24947	0.0204661	-1.30442	0.343614	-1.11121	0.0873821	1.21272	0.0398651	1.26348	0.0220363	1.29995	0.000315644	-1.54455	7.31536e-05	-1.62867	0.252197	1.13637	0.436515	-1.09032	0.863853	-1.01917	0.00108409	-1.5469	0.0113569	-1.38876	0.153292	1.17373	0.337745	1.11266	0.90474	1.015
NM_001003948 // Mm.187470 // bladder| bone| bone marrow| brain| connective tissue| dors	NM_001003948 // Pid1 // phosphotyrosine interaction domain containing 1 // 1 C5|1 // 98	NM_001003948	Pid1	228.026	292.664	0.779141	7.39754e-09	-2.58417	1.08658e-07	-2.31531	0.0139521	1.39527	0.362728	1.12655	0.0688849	1.27387	0.147534	1.21068	0.00245389	1.52054	0.110535	1.23525	0.275277	1.15392	0.00781053	1.43749	0.251427	1.16256	3.22843e-05	-1.83656	0.000131744	-1.73136	6.12407e-08	-2.36989	0.0755696	-1.26644	0.00628696	1.52185	0.878431	-1.02264	0.431034	-1.10843	0.44121	-1.10591	0.684338	-1.06136
NM_011161 // Mm.91969 // brain| embryonic tissue| extraembryonic tissue| eye| heart| in	NM_011161 // Mapk11 // mitogen-activated protein kinase 11 // 15 E3|15 // 19094 /// ENS	NM_011161	Mapk11	622.35	253.923	2.45094	7.77636e-07	-2.58244	6.12099e-07	-2.61384	0.00146077	-1.73893	0.0831642	-1.33277	0.765481	-1.04972	0.900195	1.0206	0.611051	-1.08635	0.758163	-1.05136	0.855677	1.03002	0.725169	-1.05887	0.48684	-1.12009	0.044545	1.39842	0.175518	-1.24969	0.334636	-1.17095	0.652565	-1.07604	0.196711	1.26922	0.064894	1.41172	0.522326	1.10992	0.290852	-1.18884	0.59264	-1.10287
NM_001204915 // Mm.41272 // bladder| blood| bone| bone marrow| brain| connective tissue	NM_001204915 // Reep3 // receptor accessory protein 3 // 10 B5.1|10 30.0 cM // 28193 //	NM_001204915	Reep3	1298.29	432.741	3.00016	1.28944e-17	-2.57959	3.51105e-13	-1.98331	0.000134195	-1.311	0.00201569	1.23562	0.03425	1.15056	0.612902	1.03314	0.128532	-1.10435	0.00576302	-1.20533	0.0790013	-1.1222	0.0459693	-1.14084	4.84589e-16	2.33531	3.60009e-08	1.548	1.3795e-06	1.43898	0.580939	1.03622	0.000562299	-1.27142	7.63927e-05	1.37367	0.000651229	1.305	0.0181726	-1.17072	0.0557059	-1.13435	0.00260857	-1.25989
NM_011394 // Mm.323901 // blood| bone| bone marrow| brain| connective tissue| embryonic	NM_011394 // Slc20a2 // solute carrier family 20, member 2 // 8 A2|8 9.0 cM // 20516 //	NM_011394	Slc20a2	1398.24	1209.25	1.15629	1.26678e-24	-2.5778	4.00495e-19	-1.93964	1.18638e-08	-1.33614	0.979101	1.00106	0.0198645	1.10287	0.479801	1.02918	1.31205e-10	-1.41732	4.58429e-08	-1.3133	0.000816185	-1.15754	0.0428616	-1.08807	0.923342	1.00391	0.0137624	1.10962	0.262958	1.04686	0.160895	1.05932	0.608929	-1.02101	0.32673	-1.04602	0.107867	1.0774	0.875588	1.00637	0.356579	1.03833	0.803714	-1.0114
NM_001164036 // Mm.788 // blood| bone| bone marrow| brain| embryonic tissue| extraembry	NM_001164036 // Ly6e // lymphocyte antigen 6 complex, locus E // 15 D3|15 41.7 cM // 17	NM_001164036	Ly6e	563.558	374.803	1.50361	5.88826e-12	-2.57313	8.89455e-10	-2.1833	0.00496647	-1.33636	0.0399149	-1.22993	0.0274284	-1.24992	0.530996	-1.06348	0.0529974	1.21445	0.720588	-1.0357	0.565042	1.05812	0.625272	1.0491	0.715789	-1.03635	0.0912471	-1.18363	0.195589	1.13678	0.00542665	-1.332	0.0322476	-1.24136	0.974882	-1.00347	0.369958	1.10431	0.164525	1.14789	0.673059	-1.04226	0.0351763	-1.26963
NM_175164 // Mm.329396 // bone marrow| brain| embryonic tissue| eye| intestine| kidney|	NM_175164 // Arhgap26 // Rho GTPase activating protein 26 // 18 B3|18 // 71302 /// ENSM	NM_175164	Arhgap26	42.9701	56.0981	0.765981	7.75637e-12	-2.57305	3.661e-09	-2.10356	6.44586e-09	-2.06643	0.1552	-1.15318	0.781847	1.0278	0.897701	1.01281	7.47576e-06	-1.66141	0.0184371	-1.27362	0.0013486	-1.40429	0.000104041	-1.52921	0.949401	1.0063	0.308016	1.1069	0.0114343	-1.29825	0.0225749	-1.26301	0.841247	1.02002	2.30088e-05	1.70069	0.000926642	1.48592	0.0556809	1.21402	0.928916	-1.00887	0.653533	-1.05124
NM_130796 // Mm.33721 // adrenal gland| bladder| blood| bone| bone marrow| brain| dorsa	NM_130796 // Snx18 // sorting nexin 18 // 13 D2.2|13 // 170625 /// ENSMUST00000109241 /	NM_130796	Snx18	574.332	675.855	0.849786	2.75209e-14	-2.57144	3.86577e-12	-2.22105	1.79722e-05	-1.48525	0.776807	-1.02338	0.357712	1.07828	0.842196	1.01636	4.94569e-05	-1.44678	0.00766074	-1.25574	0.00855335	-1.25138	0.0658438	-1.16562	0.0145867	-1.22998	0.000108091	-1.41734	0.334465	-1.08235	0.010359	-1.24376	0.383648	1.07395	0.00484325	-1.31235	0.0612376	-1.19167	0.125602	-1.13513	0.735973	-1.02788	0.33635	1.0926
NM_134255 // Mm.430736 // bladder| blood| bone| bone marrow| brain| connective tissue|	NM_134255 // Elovl5 // ELOVL family member 5, elongation of long chain fatty acids (yea	NM_134255	Elovl5	1429.37	840.02	1.70159	3.53856e-14	-2.57064	6.08392e-07	-1.62514	0.189421	-1.11517	0.048349	1.18099	0.321649	1.08538	0.147817	1.12808	0.704828	-1.03164	0.000123971	-1.41608	0.626463	-1.04085	0.0282679	-1.20436	0.441802	-1.06548	0.0254686	-1.20879	0.162418	1.12324	0.000880081	-1.34183	0.58159	1.0464	0.735308	-1.03172	0.572777	-1.05354	0.256725	1.0985	0.0135687	-1.23496	0.921334	-1.00916
NM_175184 // Mm.254914 // bladder| bone marrow| brain| dorsal root ganglion| embryonic	NM_175184 // Fam125b // family with sequence similarity 125, member B // 2 B|2 // 72543	NM_175184	Fam125b	147.946	150.896	0.98045	7.05021e-07	-2.56778	0.0053142	-1.60263	0.434251	-1.13452	0.614986	-1.08436	0.357883	1.16024	0.785758	-1.04469	1.42852e-08	3.12276	2.70435e-11	4.33548	4.26537e-10	3.74175	1.34813e-11	4.5037	1.0378e-14	6.84342	1.67084e-12	5.06087	0.406215	-1.14354	0.014259	1.50656	0.00083234	-1.78349	1.08641e-10	4.77771	1.41476e-06	2.77463	0.0441974	-1.394	0.852424	-1.03037	0.0253731	-1.51784
XR_104776 // Mm.302783 // brain| embryonic tissue| mammary gland| juvenile	XR_104776 // Gm19426 // predicted gene, 19426 // --- // 100502874	XR_104776	Gm19426	141.17	168.456	0.83802	1.82929e-07	-2.56661	0.0146959	-1.46297	0.942988	-1.01078	0.129185	-1.25985	7.20216e-07	-2.4078	0.146077	1.24733	0.183717	1.22345	0.00288999	-1.60602	0.00202613	1.63714	0.319263	-1.16222	0.0249409	-1.41558	3.89699e-05	-1.99594	0.00331019	1.59413	0.0533491	-1.34569	0.315373	1.16365	0.039738	-1.42796	0.0526181	-1.3975	0.167964	1.23288	0.21279	-1.20774	0.566856	-1.10154
NM_009437 // Mm.15312 // bone| brain| embryonic tissue| extraembryonic tissue| eye| int	NM_009437 // Tst // thiosulfate sulfurtransferase, mitochondrial // 15 E1|15 45.3 cM //	NM_009437	Tst	218.725	301.221	0.726128	5.3298e-08	-2.56632	6.63097e-06	-2.07557	0.000855728	-1.66061	0.150172	1.22886	0.0684591	1.30095	0.0116864	1.4499	0.0229663	-1.39432	0.0708217	-1.29795	0.684887	-1.05908	0.000115947	-1.82494	6.97144e-05	-1.86793	0.000273185	-1.75371	0.00343691	-1.54874	0.0372545	-1.35365	0.589706	-1.07934	0.677735	-1.06828	0.0454246	-1.38552	0.202911	1.19941	0.962429	-1.00668	0.920493	-1.01598
NM_177606 // Mm.215159 // brain| connective tissue| embryonic tissue| eye| inner ear| k	NM_177606 // Plekhh2 // pleckstrin homology domain containing, family H (with MyTH4 dom	NM_177606	Plekhh2	279.945	163.261	1.7147	8.7301e-14	-2.56399	7.29647e-12	-2.24311	0.00326462	-1.30066	1.89801e-13	-2.50268	0.000389719	-1.38473	0.981065	-1.00201	0.603272	1.04492	0.000123195	1.42995	0.000377112	1.38603	0.000763326	1.35833	0.233208	-1.10689	0.390892	-1.07548	0.000112098	-1.43366	4.55671e-10	-1.99559	0.446902	-1.06656	0.000285867	1.45581	0.000645272	1.41845	0.160706	1.1274	0.00299004	-1.30419	0.518426	-1.06333
NM_010128 // Mm.182785 // bladder| blood| bone| bone marrow| brain| connective tissue|	NM_010128 // Emp1 // epithelial membrane protein 1 // 6 G1|6 65.0 cM // 13730 /// ENSMU	NM_010128	Emp1	1245.04	362.074	3.43864	8.12646e-05	-2.56111	5.19229e-05	-2.6418	0.000223437	-2.38541	0.782189	1.0613	0.891584	-1.02975	0.963159	-1.00998	0.542738	1.14024	0.766176	-1.06609	0.595662	1.12114	0.573211	1.12909	0.00678076	-1.84249	0.0580898	-1.51781	0.39814	-1.20032	0.123424	-1.40007	0.741865	1.07347	0.00967259	-1.9221	0.496845	-1.17904	0.79583	-1.05726	0.692138	1.08899	0.323534	1.27138
NM_178676 // Mm.76648 // bladder| brain| embryonic tissue| eye| inner ear| joint| lung|	NM_178676 // Entpd3 // ectonucleoside triphosphate diphosphohydrolase 3 // 9 F4|9 // 21	NM_178676	Entpd3	199.945	39.0273	5.12321	1.47677e-08	-2.55853	9.29437e-07	-2.15491	1.22908e-05	-1.93612	0.0948294	-1.25352	0.0791724	1.2686	0.0039338	1.49868	5.56423e-07	-2.20102	8.37232e-08	-2.38021	1.70332e-07	-2.31126	1.80725e-08	-2.537	0.425534	1.11214	0.253854	1.16515	0.978394	1.0036	0.191716	1.19165	0.886606	1.01912	0.132984	1.25553	0.160377	1.23642	0.246196	1.16811	0.0514299	1.30373	0.740531	1.0507
NM_146126 // Mm.371580 // bladder| bone| bone marrow| brain| embryonic tissue| extraemb	NM_146126 // Sord // sorbitol dehydrogenase // 2 E5|2 66.0 cM // 20322 /// ENSMUST00000	NM_146126	Sord	226.741	92.8217	2.44276	2.56578e-07	-2.55648	0.000161177	-1.87804	0.881244	1.02295	0.00177346	-1.65939	0.264094	-1.18649	0.175575	-1.23146	0.00021141	-1.85276	0.187064	-1.22466	0.1455	-1.25126	0.150609	1.24766	0.70538	1.05916	0.581948	1.08739	0.805866	-1.03805	0.706756	-1.05886	0.344808	1.15525	0.000648626	1.87526	0.00376459	1.68638	0.637744	1.07425	0.59584	-1.08405	0.068252	-1.37437
NM_145590 // Mm.220880 // bone marrow| brain| connective tissue| embryonic tissue| extr	NM_145590 // BC017158 // cDNA sequence BC017158 // 7 F3|7 // 233913 /// ENSMUST00000033	NM_145590	BC017158	208.682	151.935	1.3735	1.01835e-10	-2.55407	6.78868e-08	-2.03888	0.00343839	-1.39714	0.0972048	-1.20013	0.930675	1.00944	0.13931	-1.17587	0.191657	-1.15331	0.717421	-1.03991	0.166974	-1.1632	0.187116	-1.15505	5.41292e-05	1.62663	0.0296324	1.27426	0.713471	-1.0405	0.00300589	-1.40458	0.0166889	-1.30798	3.15814e-05	1.76394	0.000669507	1.56193	0.378854	1.10027	0.44973	-1.08542	0.0834629	-1.23895
NM_172532 // Mm.393311 // bone| bone marrow| brain| dorsal root ganglion| embryonic tis	NM_172532 // Aldh5a1 // aldhehyde dehydrogenase family 5, subfamily A1 // 13 A3.1 // 21	NM_172532	Aldh5a1	128.909	174.909	0.737007	2.90794e-12	-2.55352	2.94417e-05	-1.56086	0.00561575	-1.31795	0.399743	-1.08348	0.067768	1.19354	0.313047	-1.10103	0.0140041	1.27417	8.58645e-05	1.51091	0.0834953	1.18208	0.0498043	1.21004	1.95421e-10	2.23038	2.54603e-09	2.06105	0.620128	-1.04818	0.0150975	-1.2705	0.0156173	-1.26884	3.06036e-08	2.07254	2.39969e-09	2.25834	0.110128	-1.16644	0.0612391	-1.19902	0.0142114	-1.31208
NM_028610 // Mm.35597 // embryonic tissue| extraembryonic tissue| testis| cleavage| mor	NM_028610 // Dppa4 // developmental pluripotency associated 4 // 16 B5|16 // 73693 ///	NM_028610	Dppa4	467.981	848.87	0.551298	5.61493e-14	-2.55058	9.33401e-14	-2.51089	0.000500696	-1.36616	0.776324	-1.02379	0.123411	-1.13816	0.127993	1.13633	0.000583212	-1.36032	9.47766e-08	-1.71051	0.249965	-1.10073	2.85758e-06	-1.56702	7.73268e-06	-1.52721	0.000756177	-1.35038	0.167812	-1.12244	0.0473821	-1.18326	0.241432	1.10269	0.613736	-1.04811	0.75677	-1.02922	0.0173876	1.22649	0.574676	1.04761	0.659837	1.04181
NM_001253381 // Mm.123843 // bone marrow| brain| embryonic tissue| eye| heart| kidney|	NM_001253381 // B4galt2 // UDP-Gal:betaGlcNAc beta 1,4- galactosyltransferase, polypept	NM_001253381	B4galt2	144.438	105.769	1.36561	0.000154487	-2.53597	8.55968e-05	-2.6473	0.576491	-1.13325	0.229304	-1.31159	0.853286	1.04221	0.183016	1.35131	0.0796169	-1.49144	0.246193	-1.29885	0.351034	-1.23322	0.0239573	-1.68506	0.00454367	1.952	0.00257639	2.04501	0.3316	1.24402	0.571109	-1.13527	0.00895194	-1.84244	0.0227489	1.80723	0.0291869	1.75956	0.733349	1.07918	0.131341	-1.40817	0.00995664	-1.96634
NM_001145162 // Mm.23960 // brain| dorsal root ganglion| embryonic tissue| eye| spinal	NM_001145162 // Ube2ql1 // ubiquitin-conjugating enzyme E2Q family-like 1 // 13 C1|13 /	NM_001145162	Ube2ql1	330.381	55.2648	5.97813	9.19261e-11	-2.53555	1.29414e-10	-2.50499	2.94009e-07	-1.92585	0.000812068	-1.46988	0.396232	-1.09528	0.717192	1.03947	5.28303e-07	-1.88877	9.94555e-06	-1.71297	1.10636e-06	-1.84302	5.86743e-09	-2.19543	0.29181	1.12006	0.00414504	1.3815	0.417558	-1.09082	0.463688	1.08168	0.877887	-1.01654	0.254148	-1.14795	0.23015	1.15641	0.00738587	-1.3497	0.569103	-1.06282	0.85458	1.02224
ENSMUST00000114018 // Mm.256966 // brain| dorsal root ganglion| embryonic tissue| eye|	ENSMUST00000114018 // Mtap2 // microtubule-associated protein 2 // 1 C3|1 33.7 cM // 17	ENSMUST00000114018	Mtap2	82.9973	96.7225	0.858097	1.80458e-11	-2.53096	1.6402e-11	-2.53923	1.31033e-05	-1.6433	0.0103267	-1.30802	0.88621	1.01445	0.412216	1.08608	0.00391382	-1.35744	0.802848	-1.02536	0.24619	-1.12445	0.0641974	-1.20897	0.33569	-1.10198	0.115949	1.17372	0.27882	-1.11563	0.825627	-1.02234	0.671711	-1.04346	0.953183	-1.00664	0.784603	1.03129	0.663043	-1.04471	0.0846301	-1.19278	0.550802	-1.06969
---	NR_015602 // F730043M19Rik // RIKEN cDNA F730043M19 gene // 12|12 // 320046	NR_015602	F730043M19Rik	167.199	40.5747	4.12076	2.76407e-08	-2.52989	5.06308e-05	-1.84195	0.270534	-1.16175	0.703388	-1.0528	0.532774	-1.08809	0.000291797	1.70523	7.52032e-06	-1.99835	0.000263601	-1.71303	0.571924	-1.07946	0.000107745	-1.78233	0.170752	-1.20586	0.410529	-1.11805	0.82629	-1.03008	0.959011	1.00696	0.621786	1.06898	0.433086	-1.12681	0.797392	1.03973	0.748202	-1.04432	0.574494	1.07891	0.92211	-1.01494
NM_153790 // Mm.194950 // bone marrow| brain| dorsal root ganglion| embryonic tissue| e	NM_153790 // Scarf2 // scavenger receptor class F, member 2 // 16 A3|16 // 224024 /// E	NM_153790	Scarf2	623.204	30.4948	20.4364	7.62351e-13	-2.52729	5.69991e-07	-1.69994	0.000130823	-1.45829	0.294389	1.09907	0.222884	1.11637	0.0630198	1.1854	0.00074786	-1.3843	0.00122943	-1.36316	0.799942	1.02294	0.00800771	-1.282	0.35594	1.08657	0.27529	1.10334	2.2978e-05	-1.53301	2.85908e-06	-1.62538	0.210051	-1.11993	0.355069	1.09797	0.394229	1.08984	0.000256729	-1.42964	1.53334e-05	-1.55065	0.59251	-1.05537
NM_029770 // Mm.290433 // bladder| blood| bone| brain| embryonic tissue| extraembryonic	NM_029770 // Unc5b // unc-5 homolog B (C. elegans) // 10 B4|10 32.0 cM // 107449 /// BC	NM_029770	Unc5b	1949.35	354.399	5.50043	1.15261e-12	-2.52648	0.000602757	-1.39998	0.956123	1.005	0.314235	1.09624	0.815772	1.02137	0.443334	-1.07229	0.142877	-1.14427	0.0271233	-1.22992	0.274113	-1.10514	0.645222	-1.04271	7.67496e-08	1.81241	5.46237e-05	1.50412	0.459056	1.06972	0.179509	-1.1311	7.92786e-05	-1.48784	0.00063985	-1.45641	0.00613231	-1.34109	6.53158e-07	-1.70613	1.04236e-05	-1.57756	0.781166	-1.02873
ENSMUST00000016143 // Mm.472750 // brain| embryonic tissue| extraembryonic tissue| eye|	ENSMUST00000016143 // Wasf3 // WAS protein family, member 3 // 5 G3|5 // 245880 /// NM_	ENSMUST00000016143	Wasf3	90.7936	481.827	0.188436	4.75034e-12	-2.52364	3.79894e-11	-2.35842	1.49503e-05	-1.59651	5.86059e-05	-1.53178	0.509382	-1.06504	0.307617	-1.10277	0.0269024	-1.24311	0.100704	1.17245	0.197571	-1.13206	0.430676	-1.07826	1.2831e-05	1.60385	0.00137576	1.38555	0.00698866	-1.30929	0.000420835	-1.44027	0.618688	-1.04862	2.57896e-09	2.26165	4.19577e-08	2.05796	0.966019	-1.00407	0.61874	-1.04861	0.24414	-1.13398
NM_010305 // Mm.254629 // bone| bone marrow| brain| embryonic tissue| extraembryonic ti	NM_010305 // Gnai1 // guanine nucleotide binding protein (G protein), alpha inhibiting	NM_010305	Gnai1	113.086	760.629	0.148675	2.69184e-09	-2.52286	6.73845e-09	-2.43481	0.0218384	-1.33445	2.48443e-08	-2.31595	3.25982e-05	-1.76314	0.0748341	-1.24743	9.78543e-11	-2.87671	6.47641e-09	-2.43854	4.83516e-05	-1.73636	1.63985e-06	-1.97615	0.0275819	1.31845	0.0260653	1.32235	0.000353513	1.60444	0.0643136	1.25855	0.919281	-1.0124	0.0438276	-1.32674	0.81521	-1.03245	0.725437	-1.04365	0.75664	-1.03841	0.818426	1.03186
NM_001145924 // Mm.140749 // brain| embryonic tissue| eye| heart| inner ear| intestine|	NM_001145924 // 5730528L13Rik // RIKEN cDNA 5730528L13 gene // 4|4 B2 // 66665 /// NM_0	NM_001145924	5730528L13Rik	220.264	299.327	0.735863	2.90722e-14	-2.52041	5.97629e-10	-1.90998	0.594111	-1.04358	9.17794e-09	-1.78096	0.00179338	-1.30491	0.0790224	-1.15396	0.240869	1.09917	0.000250424	1.37708	0.0727785	1.15768	0.595324	1.04344	4.81955e-12	-2.17345	1.70211e-09	-1.85906	0.000488141	-1.35272	1.99916e-06	-1.55713	0.882782	1.01185	4.98125e-06	-1.60323	0.000330106	-1.42086	0.495224	1.05619	0.133865	-1.12925	0.475581	1.06638
NM_007863 // Mm.20449 // brain| embryonic tissue| eye| inner ear| intestine| joint| lun	NM_007863 // Mpp3 // membrane protein, palmitoylated 3 (MAGUK p55 subfamily member 3) /	NM_007863	Mpp3	45.9554	34.6089	1.32785	1.72467e-08	-2.5145	1.19355e-05	-1.92362	0.000685533	-1.61801	0.032611	-1.33514	0.121048	-1.22967	0.860727	1.02331	0.000368209	-1.6633	0.00698169	-1.44996	0.143286	-1.21513	0.0088417	-1.43269	0.350351	1.13123	0.0480905	1.30499	0.429375	1.10979	0.186393	1.19178	0.687098	-1.05436	0.705365	1.05741	0.172112	1.22615	0.989988	-1.00165	0.569707	1.07766	0.53708	-1.09557
NM_001103157 // Mm.274956 // adipose tissue| bladder| blood| bone| bone marrow| brain|	NM_001103157 // Steap2 // six transmembrane epithelial antigen of prostate 2 // 5 A1|5	NM_001103157	Steap2	496.821	429.948	1.15554	4.36821e-11	-2.51334	1.96137e-05	-1.64267	0.000106202	-1.5538	6.90646e-05	-1.5762	0.000734288	-1.45427	0.0157552	-1.29431	0.270571	-1.12097	0.201783	-1.14187	0.0142291	-1.29982	0.214077	1.13775	0.0087141	1.32607	0.00582583	1.34731	4.9053e-05	1.59412	0.175755	1.15131	0.882592	1.01531	0.507015	-1.07992	0.00188064	1.46648	0.941039	-1.00764	0.28473	1.1172	0.390777	-1.10477
NM_010139 // Mm.2581 // bone| bone marrow| brain| embryonic tissue| extraembryonic tiss	NM_010139 // Epha2 // Eph receptor A2 // 4 D-E|4 73.2 cM // 13836 /// ENSMUST0000000661	NM_010139	Epha2	365.068	669.356	0.545402	2.05816e-10	-2.50855	6.79967e-05	-1.61986	0.693055	1.04396	2.1437e-15	-3.93546	2.66895e-05	-1.67347	0.00342866	-1.40097	5.63083e-10	-2.42019	0.0293456	-1.27727	0.00468865	-1.3834	0.036395	-1.26422	0.426846	-1.09076	0.35155	1.10739	0.868563	-1.01819	0.509271	-1.07472	0.718526	-1.04006	0.30298	1.1353	0.794623	-1.03237	0.0536871	1.24017	0.0927686	-1.20494	0.871595	-1.01998
---	AK016855 // 4933421A08Rik // RIKEN cDNA 4933421A08 gene // 4|4 // 71097	AK016855	4933421A08Rik	34.4935	21.9829	1.5691	2.15452e-12	-2.50606	3.83944e-07	-1.74445	0.0042338	-1.31973	0.0229383	-1.24139	0.0452781	-1.20789	0.515507	1.06176	0.0874268	-1.17362	0.346911	-1.09083	0.949726	1.00581	0.0271128	-1.2333	0.344914	-1.09123	0.790401	1.02474	0.838893	1.01887	0.033337	1.22317	0.0734253	1.18293	0.420638	-1.0871	0.586725	1.05785	0.950367	-1.00574	0.0304812	1.22758	0.180875	1.15003
NM_138751 // Mm.490421 // bladder| brain| connective tissue| embryonic tissue| eye| fer	NM_138751 // Tmem47 // transmembrane protein 47 // X|X A7.2 // 192216 /// ENSMUST000001	NM_138751	Tmem47	68.8324	2352.05	0.0292649	9.67447e-05	-2.50521	2.20601e-05	-2.77074	0.00370358	-1.92107	0.004342	-1.89715	0.508373	-1.15158	0.531972	1.14263	0.000210449	-2.37331	0.101164	-1.42615	0.160404	-1.35331	0.00236944	-1.98873	0.382081	1.20553	0.975574	1.00654	0.762485	-1.06646	0.0972932	-1.4322	0.373865	-1.20949	0.245151	1.32356	0.179933	1.38318	0.348203	1.22233	0.541115	1.13924	0.93832	-1.01867
NM_175105 // Mm.29756 // brain| connective tissue| embryonic tissue| extraembryonic tis	NM_175105 // Aqp11 // aquaporin 11 // 7 E2|7 // 66333 /// ENSMUST00000084986 // Aqp11 /	NM_175105	Aqp11	219.302	149.537	1.46654	1.54222e-08	-2.50116	0.000364965	-1.65488	0.00169628	-1.54512	0.611747	1.06826	0.0775433	1.26358	0.110947	1.23425	0.000130765	-1.72941	0.00761353	-1.43796	0.0172657	-1.37842	0.0102302	-1.41662	6.08041e-05	-1.78602	0.00838986	-1.43096	0.0253121	-1.35006	0.164903	-1.20038	0.0710627	1.27057	0.133048	-1.24914	0.352536	1.14617	0.639643	-1.06279	0.141094	1.21392	0.408354	1.12884
NM_054045 // Mm.358797 // bone marrow| brain| embryonic tissue| extraembryonic tissue|	NM_054045 // Hist2h3c2 // histone cluster 2, H3c2 // 3 F2.1|3 // 97114 /// ENSMUST00000	NM_054045	Hist2h3c2	274.127	231.335	1.18498	8.64559e-06	-2.49974	0.0151965	-1.57568	0.301572	-1.20616	0.001893	-1.81603	2.88137e-06	-2.65935	0.0940358	-1.35974	0.139217	1.31032	0.107955	-1.34254	0.0118684	1.60417	0.333767	1.19151	0.613156	1.09554	0.174702	-1.28083	0.0731252	1.39062	0.863131	1.03156	0.971156	1.00654	0.563895	1.12422	0.951778	1.01232	0.286566	1.21343	0.476562	1.13734	0.443848	-1.16838
ENSMUST00000161002 // Mm.140765 // bone| brain| dorsal root ganglion| eye| heart| pancr	ENSMUST00000161002 // Ecel1 // endothelin converting enzyme-like 1 // 1 D|1 // 13599 //	ENSMUST00000161002	Ecel1	40.2359	28.3402	1.41974	2.58628e-11	-2.49903	7.65784e-09	-2.07425	0.294225	-1.11168	5.25738e-06	-1.69077	0.139027	-1.16229	0.336481	-1.10175	0.000139893	-1.52272	0.00763448	-1.32337	1.76262e-06	-1.7495	2.19788e-06	-1.7375	0.807655	1.02471	0.10042	1.18242	0.0718992	-1.20228	0.763973	-1.03057	0.493142	-1.07132	0.74581	1.0372	0.561524	1.06771	0.0477065	-1.22578	0.108375	-1.17778	0.375193	-1.10558
NM_080634 // Mm.291533 // blood| bone| bone marrow| brain| embryonic tissue| extraembry	NM_080634 // Hps3 // Hermansky-Pudlak syndrome 3 homolog (human) // 3 A2|3 12.5 cM // 1	NM_080634	Hps3	459.016	248.92	1.84403	1.15081e-13	-2.4972	2.56045e-11	-2.13179	0.000128058	-1.41877	0.00248811	-1.3048	0.735475	1.02839	0.117732	1.14066	2.25035e-05	-1.48589	0.0117415	-1.24299	0.063214	-1.17036	0.000798365	-1.34872	0.183734	1.11777	0.00650981	1.26685	0.745233	1.02729	0.611273	-1.04305	0.872125	-1.01342	1.82577e-05	1.57008	1.61298e-07	1.80103	0.000434371	1.37204	0.00311838	1.29597	0.49456	-1.06582
AK048812 // Mm.127699 // brain /// XR_104701 // Mm.127699 // brain	AK048812 // Gm16488 // predicted gene 16488 // 2 E3|2 // 791267 /// XR_104701 // Gm1648	AK048812	Gm16488	31.5935	24.5571	1.28653	8.26826e-11	-2.49674	9.50592e-09	-2.12598	0.513932	-1.07085	0.00556622	-1.35662	0.00106863	-1.44389	0.680615	-1.04404	0.000854484	-1.45563	0.000271212	-1.5159	0.223566	-1.13715	0.0396356	-1.24761	0.850356	1.01993	0.427848	-1.08683	0.0310251	1.2618	0.253743	1.12792	0.215645	1.13973	0.26763	-1.14032	0.430937	-1.09738	0.634908	-1.05099	0.844598	-1.02072	0.9971	-1.00043
NM_010158 // Mm.17964 // bone marrow| brain| connective tissue| embryonic tissue| epidi	NM_010158 // Khdrbs3 // KH domain containing, RNA binding, signal transduction associat	NM_010158	Khdrbs3	327.379	665.521	0.491914	5.15894e-15	-2.49546	7.72004e-13	-2.16922	4.14324e-06	-1.4877	1.92679e-10	-1.88312	0.000842033	-1.30823	0.0449051	-1.16636	2.89795e-12	-2.09462	5.41761e-08	-1.64561	5.59261e-09	-1.73597	6.72482e-08	-1.63733	0.116648	-1.12655	0.272333	-1.0862	0.0815556	-1.142	0.010943	-1.2195	0.856691	1.01359	0.372138	1.07825	0.0271677	1.21112	0.765879	-1.02252	0.912617	-1.00824	0.403388	-1.07303
NM_001163170 // Mm.482147 // bladder| blood| bone marrow| brain| dorsal root ganglion|	NM_001163170 // Lix1l // Lix1-like // 3 F2.1|3 // 280411 /// ENSMUST00000062058 // Lix1	NM_001163170	Lix1l	710.854	222.184	3.1994	2.06088e-06	-2.4865	1.3205e-05	-2.25966	0.000152475	-1.98609	0.638621	-1.08051	0.522663	1.1113	0.149149	1.27219	0.14525	-1.27525	0.364641	-1.1619	0.36913	-1.16026	0.441176	-1.13576	0.215312	-1.22882	0.090281	-1.32864	0.0409219	-1.41327	0.000163594	-1.97856	0.193975	1.24137	0.297837	-1.21404	0.757338	1.05886	0.0747693	-1.3492	0.0683053	-1.35896	0.180748	1.28468
NM_001033481 // Mm.329716 // blood| bone marrow| brain| embryonic tissue| eye| intestin	NM_001033481 // Gm98 // predicted gene 98 // 19 A|19 // 225908 /// ENSMUST00000088013 /	NM_001033481	Gm98	60.3508	544.659	0.110805	2.80431e-11	-2.48492	5.85189e-14	-3.09364	2.03554e-05	-1.61767	0.318958	-1.1054	0.196366	1.13937	0.659257	-1.04509	0.000360551	-1.47385	0.728834	-1.03527	0.835641	-1.02095	0.932047	-1.00856	1.53419e-14	-3.25455	8.69146e-05	-1.54437	6.42145e-05	-1.55952	0.745052	-1.03304	0.119757	1.17104	0.279263	-1.13018	0.337972	-1.11427	1.1432e-06	1.77002	0.0153766	1.28609	0.306438	1.12253
NM_028804 // Mm.274715 // bladder| brain| connective tissue| dorsal root ganglion| embr	NM_028804 // Ccdc3 // coiled-coil domain containing 3 // 2 A1|2 // 74186 /// ENSMUST000	NM_028804	Ccdc3	51.5833	34.8518	1.48008	4.70071e-07	-2.47769	0.0230793	-1.42746	0.189899	-1.2223	0.88721	1.02171	0.660561	-1.06885	0.914042	-1.01648	0.5236	-1.10168	0.747556	-1.04998	0.98269	-1.00329	0.265165	1.18542	0.546032	1.09597	0.612464	1.07986	0.362122	1.14883	0.692252	1.06183	0.943537	-1.01078	0.185477	-1.25592	0.599602	-1.09361	0.862982	1.02648	0.507775	1.10581	0.252948	1.21674
---	AY140896 // Gm3579 // predicted gene 3579 // 4 D2.3|4 // 100041932 /// AY140896 // Gm35	AY140896	Gm3579	29.8741	17.5826	1.69907	2.7498e-10	-2.47559	7.66621e-08	-2.03727	0.101903	-1.19801	0.112826	1.19118	0.79207	-1.02904	0.0930013	1.20407	0.106558	1.19503	0.927784	1.00989	0.124435	1.18453	0.2712	1.12792	0.862781	-1.01894	0.389099	1.09849	0.896395	-1.01424	0.0468903	1.24775	0.790908	1.02921	0.383366	1.11275	0.346754	1.12234	0.804169	1.02729	0.150227	1.17149	0.64802	-1.05733
NM_008706 // Mm.252 // bladder| bone marrow| brain| embryonic tissue| heart| intestine|	NM_008706 // Nqo1 // NAD(P)H dehydrogenase, quinone 1 // 8 D3|8 53.3 cM // 18104 /// EN	NM_008706	Nqo1	191.566	290.834	0.65868	4.10818e-09	-2.47457	1.60723e-07	-2.15206	0.204718	-1.16799	0.00152211	-1.50768	0.624651	-1.06117	0.91477	1.01305	0.001224	-1.52173	0.00694443	-1.40939	0.073366	-1.248	0.393801	-1.10939	2.09104e-10	-2.78101	1.88619e-10	-2.79248	1.69086e-05	1.80488	0.0142366	1.362	0.0901828	1.23268	1.37602e-12	-3.98494	9.30971e-10	-2.9533	0.539404	1.07739	0.42663	1.10155	0.69763	1.05437
ENSMUST00000108511 // Mm.48648 // brain| embryonic tissue| eye| inner ear| lung| skin|	ENSMUST00000108511 // Wscd1 // WSC domain containing 1 // 11 B4|11 // 216881 /// ENSMUS	ENSMUST00000108511	Wscd1	73.4834	69.9906	1.0499	2.88106e-13	-2.47292	2.84045e-13	-2.474	1.98331e-07	-1.69704	0.00278757	-1.30735	0.6847	-1.03494	0.974759	1.00268	8.59061e-12	-2.23427	6.84785e-09	-1.85533	1.48015e-07	-1.71015	7.79904e-07	-1.63712	0.247351	-1.10361	0.481986	-1.06141	0.049007	-1.18599	0.029485	-1.20891	0.147103	-1.13222	0.576684	1.05454	0.0373536	1.22546	0.718828	-1.03091	0.46718	1.06358	0.158126	-1.14538
NM_026301 // Mm.45980 // brain| embryonic tissue| extraembryonic tissue| eye| liver| lu	NM_026301 // Rnf125 // ring finger protein 125 // 18 A2|18 // 67664 /// ENSMUST00000050	NM_026301	Rnf125	493.187	548.463	0.899218	1.71302e-12	-2.46891	8.94867e-09	-1.91262	3.97281e-07	-1.71953	0.513211	-1.06057	0.00960656	1.27471	0.00393925	1.31406	0.000300254	1.42432	1.16598e-05	1.56451	4.32576e-06	1.60872	5.79902e-06	1.59556	1.52393e-14	-2.88526	2.05884e-10	-2.13297	4.1948e-09	-1.95433	9.75036e-05	-1.47231	0.00273924	1.32983	0.0121641	-1.30123	0.157088	-1.15541	0.085381	1.17033	0.00631257	1.29338	0.00307231	1.37175
NM_011640 // Mm.222 // blood| bone| bone marrow| brain| connective tissue| dorsal root	NM_011640 // Trp53 // transformation related protein 53 // 11 B2-C|11 39.0 cM // 22059	NM_011640	Trp53	1176.83	1678.9	0.700954	4.56182e-15	-2.46736	0.000417512	-1.32559	0.612612	1.038	0.00010586	-1.3705	0.347616	-1.07192	0.0555922	-1.15506	0.38416	-1.06641	0.958647	1.00382	0.835741	1.01537	0.704266	1.02833	0.706595	-1.02809	0.080695	-1.13997	0.4584	-1.05624	0.00813125	-1.22601	0.0186589	-1.19643	0.332306	1.08392	0.598272	-1.04457	0.0234791	1.188	0.974682	1.00234	0.464467	-1.06252
NM_001160415 // Mm.284059 // bladder| bone| bone marrow| brain| embryonic tissue| eye|	NM_001160415 // Apobec3 // apolipoprotein B mRNA editing enzyme, catalytic polypeptide	NM_001160415	Apobec3	364.849	1554.46	0.234711	1.36466e-17	-2.46653	5.61386e-17	-2.37495	1.10157e-09	-1.62416	0.256802	1.07272	0.0285404	1.1488	0.727473	-1.02164	0.0132287	-1.17158	0.000355789	-1.26952	1.55948e-10	-1.68907	5.26753e-10	-1.64818	0.0592499	-1.12584	0.508453	-1.04155	0.622019	-1.03078	0.00594236	1.19425	0.301065	1.06602	0.246749	1.08394	0.703938	-1.02659	0.0496817	1.13152	0.0209892	1.15805	0.786613	1.01886
BC021353 // Mm.277864 // bladder| blood| bone| bone marrow| brain| connective tissue| d	BC021353 // Fam107b // family with sequence similarity 107, member B // 2 A1|2 // 66540	BC021353	Fam107b	198.813	73.4011	2.70858	6.54765e-05	-2.46484	0.000741872	-2.09364	0.546249	-1.1307	0.0448139	-1.51944	0.971323	-1.00733	0.720387	-1.07547	0.128391	-1.36818	0.961991	-1.00973	0.0274775	-1.5876	0.291021	-1.2411	0.576265	1.12045	0.325365	1.22262	0.727806	-1.0733	0.77969	-1.05848	0.390303	-1.19161	0.948262	-1.01492	0.852494	1.04335	0.495285	-1.14902	0.446954	-1.16769	0.61505	-1.12181
NM_030715 // Mm.311585 // bladder| bone| bone marrow| brain| embryonic tissue| inner ea	NM_030715 // Polh // polymerase (DNA directed), eta (RAD 30 related) // 17|17 C // 8090	NM_030715	Polh	580.014	363.59	1.59524	3.42688e-15	-2.46319	4.48409e-06	-1.46917	0.0125779	-1.2081	7.40845e-06	-1.45248	0.105513	-1.1272	0.853654	-1.01351	0.000208762	-1.34388	0.374983	-1.06699	0.0116793	-1.2107	0.0081135	-1.22335	0.00566683	1.23562	0.00742165	1.22641	0.807664	-1.01787	0.0204901	-1.19071	0.518797	-1.04817	1.35671e-06	1.58832	1.48055e-07	1.68023	0.162653	1.1083	0.89358	1.00978	0.0347561	-1.19436
NM_001081097 // Mm.40896 // brain| embryonic tissue| eye| mammary gland| pituitary glan	NM_001081097 // Grik3 // glutamate receptor, ionotropic, kainate 3 // 4 D2.2|4 57.2 cM	NM_001081097	Grik3	575.306	596.836	0.963927	1.34977e-06	-2.46076	0.801891	-1.04071	0.183405	1.23856	0.194667	-1.23177	0.993007	-1.00139	0.80353	-1.04036	0.00307764	-1.64637	0.00225136	-1.67626	0.00433863	-1.6136	0.0884465	-1.31787	0.000742181	1.78318	0.00719451	1.56532	0.537268	-1.10332	0.183063	-1.23877	0.109008	-1.29575	0.196462	1.2627	0.54321	1.11501	0.0236911	-1.45047	0.00410277	-1.61893	0.297258	-1.20624
NM_025788 // Mm.289698 // blood| brain| embryonic tissue| extraembryonic tissue| eye| h	NM_025788 // Nacc1 // nucleus accumbens associated 1, BEN and BTB (POZ) domain containi	NM_025788	Nacc1	634.83	2000.02	0.317412	8.96403e-15	-2.45717	5.79151e-08	-1.64363	0.0390628	-1.17198	0.000202308	-1.3563	0.0198011	-1.19792	0.61342	-1.03857	0.0460851	1.16546	0.348437	1.07308	0.162063	1.11172	0.70099	-1.02916	5.50707e-07	-1.55966	0.00140178	-1.29125	0.426099	-1.06159	0.142366	-1.1177	0.733031	-1.02586	4.20017e-05	-1.47001	0.00618095	-1.27347	0.207466	1.09995	0.983239	-1.00157	0.404959	1.07283
NM_020604 // Mm.143761 // bone| brain| embryonic tissue| liver| mammary gland| muscle|	NM_020604 // Jph1 // junctophilin 1 // 1|1 A4 // 57339 /// ENSMUST00000038382 // Jph1 /	NM_020604	Jph1	200.447	120.904	1.6579	1.79221e-11	-2.44909	2.10939e-06	-1.70616	0.0075287	-1.31107	0.563143	-1.05763	0.358983	-1.09328	0.560998	1.05795	0.511123	-1.06579	0.0208721	-1.26029	0.495277	-1.06837	0.405923	-1.08407	7.04863e-05	1.53298	1.4031e-08	1.98461	0.73164	1.03374	0.38329	1.08841	0.11536	-1.16734	1.81796e-08	2.14102	7.2683e-09	2.20944	0.000851922	1.4151	0.0812047	1.18766	0.113496	-1.19098
NR_045696 // Mm.471548 // brain| embryonic tissue| eye| kidney| mammary gland| spinal c	NR_045696 // 9330133O14Rik // RIKEN cDNA 9330133O14 gene // 8 E1 // 100689703 /// NR_04	NR_045696	9330133O14Rik	50.9829	35.0815	1.45327	1.99066e-06	-2.44572	0.0869467	-1.32511	0.759993	1.05055	0.798247	1.04212	0.474975	-1.1226	0.521006	-1.10941	0.246624	1.20751	0.40177	1.14556	0.00791196	1.56648	0.259918	1.20114	0.289324	-1.18792	0.954607	-1.00923	0.304159	-1.18167	0.813195	1.03888	0.394429	-1.14803	0.402051	-1.16486	0.289411	-1.21344	0.980623	1.00393	0.974763	1.00512	0.941991	1.01328
NM_145140 // Mm.76543 // bone| bone marrow| brain| embryonic tissue| eye| inner ear| in	NM_145140 // Abcc10 // ATP-binding cassette, sub-family C (CFTR/MRP), member 10 // 17 C	NM_145140	Abcc10	115.586	90.3354	1.27952	1.8937e-10	-2.43942	0.0100079	-1.32725	0.835764	-1.02206	0.0714529	1.2138	0.270325	1.12403	0.427307	1.0875	0.0694868	-1.21553	7.84998e-05	-1.58612	0.0345388	-1.25738	0.00230058	-1.40651	0.0434902	1.24384	0.408584	-1.09128	0.289766	1.11876	0.0291885	-1.26714	0.506011	-1.07271	0.583726	1.06707	0.241286	1.15004	0.890035	1.01466	0.662434	1.04707	0.901932	-1.01468
NM_009824 // Mm.194339 // bone marrow| brain| embryonic tissue| extraembryonic tissue|	NM_009824 // Cbfa2t3 // core-binding factor, runt domain, alpha subunit 2, translocated	NM_009824	Cbfa2t3	163.493	32.2005	5.07735	1.66727e-11	-2.43941	4.04634e-07	-1.78558	0.495065	1.06791	0.279375	1.11032	0.0978902	1.1756	0.450185	-1.07548	0.070868	1.19382	0.00233358	1.36441	3.42659e-05	1.56266	0.000175867	1.48533	0.00215453	1.36817	0.0414875	1.22277	0.00577301	1.32136	0.0743744	1.19113	0.00380015	-1.34134	0.335143	-1.11027	0.773069	1.03161	0.224954	-1.12482	0.781046	1.02706	0.0153141	-1.31243
NM_001025573 // Mm.440221 // eye| intestine| thymus| fetus| juvenile| adult /// ENSMUST	NM_001025573 // 2010107G12Rik // RIKEN cDNA 2010107G12 gene // 6 B1|6 // 243753 /// ENS	NM_001025573	2010107G12Rik	42.6893	43.251	0.987015	4.62038e-09	-2.43623	4.46165e-07	-2.05242	0.233948	1.15461	0.533675	1.07753	0.51814	1.08063	0.601591	1.0646	0.24659	-1.15014	0.0691981	-1.24883	0.365923	-1.11492	0.154555	-1.18844	0.0428285	-1.28271	0.00018865	-1.63297	0.11339	1.21238	0.783749	-1.03341	0.00176534	-1.49071	0.000321445	-1.6943	6.19133e-07	-2.21269	0.208879	1.1641	0.410096	-1.10408	0.233767	-1.17539
---	XR_141763 // LOC100862317 // uncharacterized LOC100862317 // --- // 100862317	XR_141763	LOC100862317	78.1509	36.586	2.13609	6.0146e-07	-2.4361	1.59493e-06	-2.32747	0.00916245	-1.50707	0.0053382	-1.5548	0.143914	-1.24989	0.0717199	-1.31901	0.00352713	-1.5913	0.0343728	-1.38809	0.00539857	-1.55381	0.595151	-1.08343	0.0307361	1.39835	0.0302441	1.39983	0.432464	1.12596	0.368624	1.14573	0.567742	-1.09001	0.209287	1.23929	0.356764	1.16968	0.709042	1.05783	0.921896	1.01487	0.869233	-1.02824
ENSMUST00000119423 // Mm.246595 // brain| juvenile| adult /// NM_198959 // Mm.246595 //	ENSMUST00000119423 // Hcrtr1 // hypocretin (orexin) receptor 1 // 4 D2.2|4 // 230777 //	ENSMUST00000119423	Hcrtr1	138.342	33.6928	4.10597	3.15661e-11	-2.4312	1.40771e-08	-2.00189	0.0450726	-1.2232	2.48281e-10	2.27309	5.3656e-05	1.55468	0.000214097	1.48766	0.431094	-1.08049	0.0445053	-1.22389	0.134951	-1.16014	0.00259513	-1.36777	0.433965	1.07996	0.657399	1.04445	0.705664	1.03771	0.262995	1.11685	0.787257	1.02679	0.0459796	1.25279	0.295056	1.12304	0.748954	1.03186	0.767574	1.02938	0.250026	-1.13617
NM_007578 // Mm.334658 // bone marrow| brain| embryonic tissue| extraembryonic tissue|	NM_007578 // Cacna1a // calcium channel, voltage-dependent, P/Q type, alpha 1A subunit	NM_007578	Cacna1a	43.5903	116.523	0.374092	2.60851e-11	-2.43001	0.0042372	-1.3409	0.004417	1.33889	0.00364427	-1.34819	0.189539	-1.13762	0.704083	-1.03764	0.0044909	-1.33809	0.60762	1.05126	0.320783	-1.10198	0.581053	-1.05521	2.27824e-07	-1.82976	0.0015004	-1.3907	0.000427234	-1.45035	0.00302958	-1.35708	0.347761	-1.09612	0.0013889	-1.45287	0.284675	-1.12491	0.273463	-1.11323	0.542474	-1.06113	0.596757	-1.05959
NM_011925 // Mm.334648 // blood| bone| bone marrow| brain| connective tissue| embryonic	NM_011925 // Cd97 // CD97 antigen // 8 C2|8 38.0 cM // 26364 /// NM_001163030 // Cd97 /	NM_011925	Cd97	1427.22	912.765	1.56362	5.09472e-11	-2.42195	1.3724e-06	-1.75378	0.950265	1.00621	0.683598	-1.04133	0.599542	-1.0536	0.225464	-1.12917	1.68984e-06	1.74255	1.52514e-05	1.62747	4.57324e-06	1.6897	5.6181e-05	1.56183	0.276272	1.11507	0.203212	-1.13616	0.0121366	-1.29627	0.00251699	-1.37516	0.24632	1.12311	0.197206	1.15651	0.588021	1.06241	0.000794129	-1.4317	0.0102237	-1.30505	0.859393	-1.01996
NM_212444 // Mm.246682 // adrenal gland| blood| bone marrow| brain| connective tissue|	NM_212444 // Gyk // glycerol kinase // X C-D|X 33.0 cM // 14933 /// ENSMUST00000156390	NM_212444	Gyk	112.144	265.101	0.423022	1.30172e-09	-2.41864	1.60362e-06	-1.88053	0.000187726	-1.58637	0.0615839	-1.2402	0.34366	1.11318	0.146499	1.18023	2.96728e-13	-3.33711	8.91022e-09	-2.25712	1.95542e-08	-2.19499	6.02863e-09	-2.2888	0.245799	-1.14087	0.266305	1.13444	0.422995	-1.0948	0.0226817	1.30394	0.360314	1.10908	0.0769178	1.25651	0.0216671	1.35071	0.0401203	1.26807	0.000776185	1.50352	0.57286	1.07408
NM_011701 // Mm.268000 // adipose tissue| adrenal gland| bladder| blood| bone| bone mar	NM_011701 // Vim // vimentin // 2 A2|2 7.0 cM // 22352 /// ENSMUST00000028062 // Vim //	NM_011701	Vim	685.083	371.503	1.84408	0.00201437	-2.41771	0.00191388	-2.42959	0.017837	-1.9342	0.747798	-1.0902	0.797396	-1.07137	0.711032	-1.10465	0.428422	-1.2379	0.895286	-1.03596	0.872132	1.04416	0.263451	1.35338	0.00025386	-2.92572	0.136948	-1.49928	8.60043e-06	-3.91647	0.014714	-1.97549	0.0516484	-1.70817	0.13059	-1.58847	0.150401	-1.55208	0.0811311	-1.61209	0.108143	-1.55044	0.393548	-1.29503
NM_001033336 // Mm.40537 // blood| bone marrow| brain| embryonic tissue| extraembryonic	NM_001033336 // Abcc4 // ATP-binding cassette, sub-family C (CFTR/MRP), member 4 // 14	NM_001033336	Abcc4	171.82	801.129	0.214472	1.83547e-13	-2.40697	2.02898e-12	-2.24491	0.0275008	-1.20165	0.0111268	1.23837	0.000190962	1.39161	0.749565	1.02612	3.51559e-08	-1.73137	3.70213e-06	-1.54012	2.0836e-06	-1.56255	7.31532e-06	-1.51388	0.045524	1.18022	0.000505905	1.35557	0.00751268	-1.2538	0.243267	-1.09969	0.268032	1.09431	2.68819e-05	1.53528	0.000198111	1.44804	0.734668	1.02776	0.63397	-1.03924	0.376173	1.08402
AK129406 // Mm.29270 // bone| bone marrow| brain| embryonic tissue| extraembryonic tiss	AK129406 // BC034090 // cDNA sequence BC034090 // 1 G3|1 // 207792 /// BC034090 // BC03	AK129406	BC034090	151.568	42.7627	3.54441	1.58142e-09	-2.40584	1.00404e-08	-2.25118	0.000145239	-1.60298	0.0210323	-1.3093	0.974916	1.00355	0.900033	-1.01427	0.0942954	-1.21191	0.710095	1.04286	0.898623	-1.01448	0.243525	1.14192	0.0480281	1.25705	0.791584	-1.03027	0.757008	-1.03554	0.0837235	-1.22008	0.7692	1.03367	0.00388504	1.47198	4.17781e-07	2.14685	0.44646	1.09002	1.33114e-05	1.7475	0.977311	-1.00361
NM_029482 // Mm.221520 // bone| bone marrow| brain| embryonic tissue| extraembryonic ti	NM_029482 // 4930579G24Rik // RIKEN cDNA 4930579G24 gene // 3|3 F1 // 75939 /// ENSMUST	NM_029482	4930579G24Rik	329.232	153.094	2.15053	5.66891e-14	-2.40548	1.19504e-10	-1.95242	0.00446378	-1.26189	1.25823e-05	-1.46994	0.0434979	-1.17447	0.133623	-1.12531	1.13995e-06	-1.55798	0.000101528	-1.39589	2.76292e-05	-1.44185	3.9365e-05	-1.42929	0.0308314	1.18847	0.895284	-1.01026	3.02776e-06	1.52167	0.185422	1.10948	0.105527	1.13622	0.300579	-1.0951	0.271075	-1.1015	0.0033517	1.27229	0.193606	1.10732	0.01884	1.23642
NM_013494 // Mm.31395 // adrenal gland| bladder| bone| brain| connective tissue| dorsal	NM_013494 // Cpe // carboxypeptidase E // 8 B3.1|8 32.6 cM // 12876 /// ENSMUST00000048	NM_013494	Cpe	59.113	64.187	0.920949	0.00195573	-2.40321	0.00413433	-2.23558	0.00542847	-2.1759	0.000438619	2.75731	0.000697831	2.64422	0.0702312	1.63473	0.0817812	1.60274	0.00997656	2.04464	0.0483312	1.71293	0.37616	1.26664	0.415884	-1.2425	0.559858	1.16798	9.75505e-06	-3.82303	0.00852289	-2.07835	0.080677	-1.6056	0.712898	-1.11624	0.901774	-1.03754	0.000145198	-3.03955	0.00426055	-2.22895	0.24349	-1.42095
NM_001167936 // Mm.301798 // embryonic tissue| liver| lung| morula /// ENSMUST000000437	NM_001167936 // Zyg11a // zyg-11 homolog A (C. elegans) // 4 C7|4 // 230590 /// ENSMUST	NM_001167936	Zyg11a	102.504	292.094	0.350928	3.34169e-07	-2.40317	5.74953e-06	-2.11589	0.00655828	-1.50737	1.18358e-08	-2.79262	0.00778928	-1.49313	0.19184	-1.20895	2.94138e-10	-3.31235	2.21915e-06	-2.20821	2.15856e-08	-2.71763	3.38091e-06	-2.16695	0.000104315	1.85345	0.00572574	1.51859	0.388373	-1.13273	0.192848	-1.20842	0.617941	-1.07448	6.51411e-06	2.30667	1.57342e-06	2.47785	0.592201	-1.08022	0.372096	1.13769	0.137963	-1.27522
ENSMUST00000072425 // Mm.31630 // adrenal gland| bladder| bone| bone marrow| brain| emb	ENSMUST00000072425 // Tcf7 // transcription factor 7, T cell specific // 11 B1.3|11 28.	ENSMUST00000072425	Tcf7	1332.04	945.059	1.40948	2.31548e-16	-2.40166	1.90137e-12	-1.91963	2.6171e-06	-1.42546	0.212022	1.08533	0.0607073	1.13275	0.0324252	1.15391	0.00961357	-1.19215	0.30554	-1.0693	0.946962	1.00433	0.00927894	-1.19323	0.209178	1.0859	0.00141343	1.24829	1.39639e-06	-1.44368	0.00864704	-1.19536	0.301167	-1.06996	1.74367e-07	1.5837	3.78538e-06	1.47686	0.845475	-1.01274	0.610564	-1.03369	0.219703	-1.09467
NM_001038999 // Mm.153230 // blood| bone| bone marrow| brain| dorsal root ganglion| emb	NM_001038999 // Atp8a1 // ATPase, aminophospholipid transporter (APLT), class I, type 8	NM_001038999	Atp8a1	169.388	372.297	0.45498	4.11534e-10	-2.40151	0.00241446	-1.41008	0.0980942	-1.1966	0.232745	1.13698	0.0349011	1.26047	0.960669	1.00527	4.22983e-08	-2.05159	1.81285e-05	-1.67716	1.59143e-05	-1.68453	0.000458968	-1.49961	1.17496e-11	2.72576	5.66263e-11	2.57533	0.965731	-1.00459	0.19934	1.14829	0.0267819	-1.27604	1.4005e-09	2.55192	1.73918e-10	2.76832	0.946443	1.00719	0.00967291	1.334	0.170616	-1.18071
NM_001025250 // Mm.282184 // adrenal gland| bladder| blood| bone marrow| brain| connect	NM_001025250 // Vegfa // vascular endothelial growth factor A // 17 C|17 24.2 cM // 223	NM_001025250	Vegfa	861.979	446.64	1.92992	2.48683e-07	-2.40133	7.76435e-05	-1.86061	0.114324	-1.25501	0.000491265	1.70709	0.273585	1.16902	0.760708	1.04407	0.0958842	-1.27121	0.00259687	-1.57237	0.397353	-1.12789	0.19879	1.20181	6.36642e-14	4.93095	1.55411e-08	2.71476	0.00108886	1.64244	0.895382	1.01879	0.409737	-1.12433	1.36069e-08	3.092	4.85912e-05	2.05777	0.405368	-1.12558	0.00628369	-1.50115	0.101578	-1.30337
NM_001100452 // Mm.37642 // brain| embryonic tissue| eye| heart| intestine| liver| lung	NM_001100452 // BC032203 // cDNA sequence BC032203 // 17 C|17 // 210982 /// ENSMUST0000	NM_001100452	BC032203	430.943	955.923	0.450814	2.38054e-14	-2.40014	8.78001e-05	-1.38661	0.00222895	-1.27708	0.0502434	1.16293	6.42143e-05	1.39718	0.134304	1.12102	3.59423e-07	-1.57898	0.113373	-1.12862	0.00236159	-1.27508	0.173547	-1.10912	6.0523e-08	-1.64623	3.1844e-06	-1.50047	0.000722617	-1.31552	0.000138243	-1.37131	0.100778	1.1338	0.115994	-1.14447	0.461424	-1.06443	0.690066	1.03047	0.673441	-1.03223	0.434567	1.06852
NM_007801 // Mm.2277 // bladder| blood| bone| bone marrow| brain| connective tissue| em	NM_007801 // Ctsh // cathepsin H // 9 E3.1|9 50.0 cM // 13036 /// ENSMUST00000034915 //	NM_007801	Ctsh	58.408	57.1701	1.02165	1.12004e-09	-2.39087	1.50361e-05	-1.71975	0.0123206	-1.33369	0.006198	1.37368	0.0273869	1.28589	0.421204	1.09328	5.5654e-06	-1.78004	1.92751e-05	-1.70492	3.87035e-08	-2.11166	4.28616e-08	-2.10422	1.48445e-07	2.01604	1.17162e-05	1.73474	0.101396	1.20209	0.00397955	1.39911	0.910238	1.01253	3.27353e-08	2.33119	0.00223424	1.49697	0.0361821	1.26875	0.381265	1.10203	0.526294	-1.08201
NM_001145803 // Mm.8149 // brain| embryonic tissue| eye| oviduct| testis| morula| gastr	NM_001145803 // Mak // male germ cell-associated kinase // 13 A3.3|13 23.0 cM // 17152	NM_001145803	Mak	95.7184	98.3362	0.97338	6.01535e-09	-2.3906	3.39572e-07	-2.05818	2.89727e-06	-1.90192	9.55563e-05	-1.66826	0.00754523	-1.3934	0.933264	-1.00997	0.838216	-1.02449	0.381766	1.10975	0.985777	1.00211	0.550161	-1.07353	0.0167707	1.34202	0.000105294	1.66204	0.623544	1.05997	0.041828	1.28112	0.527918	-1.07785	0.607279	-1.07094	0.0950342	1.25395	0.357284	-1.1159	0.179769	1.17445	0.370468	1.12732
NM_009636 // Mm.4665 // bladder| bone| bone marrow| brain| connective tissue| embryonic	NM_009636 // Aebp1 // AE binding protein 1 // 11 A1|11 // 11568 /// ENSMUST00000102923	NM_009636	Aebp1	457.039	48.3743	9.44797	1.34232e-10	-2.38654	7.75757e-07	-1.80604	4.72974e-08	-1.97259	2.602e-05	1.61575	0.0011984	1.42151	0.45239	1.07939	0.136303	-1.16543	0.163436	-1.15367	0.717866	-1.03731	0.0713168	-1.20513	0.336331	-1.10293	0.478552	-1.07467	0.0118471	-1.30439	0.427743	-1.084	0.0122482	-1.30264	0.00347654	-1.42168	0.00405244	-1.41256	0.0177623	-1.2829	0.411408	-1.08716	0.957318	1.00611
NM_001163763 // Mm.11434 // bladder| bone| bone marrow| brain| connective tissue| dorsa	NM_001163763 // Tcf19 // transcription factor 19 // 17 B1|17 // 106795 /// NM_001163764	NM_001163763	Tcf19	186.419	230.72	0.807988	3.46666e-10	-2.38348	1.25776e-05	-1.68419	0.852704	1.01968	9.18902e-05	-1.57574	0.0163044	-1.2993	0.760553	-1.03252	0.000162517	-1.5453	0.000144668	-1.55149	0.000987569	-1.44993	9.76015e-05	-1.57251	1.2299e-06	-1.81758	0.0238526	-1.27789	1.5825e-05	-1.67144	0.00732139	-1.34328	0.0583174	-1.22558	0.315409	1.12656	0.230381	1.15346	0.177923	1.15381	0.75375	1.03349	0.0303466	-1.30127
ENSMUST00000022099 // Mm.284649 // blood| bone| bone marrow| brain| connective tissue|	ENSMUST00000022099 // Lpcat1 // lysophosphatidylcholine acyltransferase 1 // 13 C1|13 /	ENSMUST00000022099	Lpcat1	710.472	830.635	0.855336	2.22955e-19	-2.38253	1.67688e-16	-2.03846	1.33659e-06	-1.34478	0.00479443	1.16809	0.00314153	1.17767	0.254857	1.06186	0.00110402	1.20082	0.000305805	1.22855	0.364077	1.04885	0.119248	1.08625	0.062851	1.10457	0.654081	-1.02373	0.00544684	1.16517	0.000222556	-1.23534	0.379948	-1.0472	0.191784	-1.0806	0.0226145	1.1486	0.296543	-1.05649	0.130695	-1.08349	0.194931	-1.08
NM_011249 // Mm.244671 // bone marrow| brain| embryonic tissue| eye| fertilized ovum| i	NM_011249 // Rbl1 // retinoblastoma-like 1 (p107) // 2 H1|2 92.0 cM // 19650 /// ENSMUS	NM_011249	Rbl1	581.491	724.61	0.802489	2.56959e-17	-2.38169	1.59233e-13	-1.93022	0.000303317	-1.26746	0.495319	1.042	0.0830419	1.11218	0.123693	-1.0986	0.00075617	-1.24414	0.219286	-1.07747	0.0183158	-1.15856	0.911581	1.0067	2.46003e-14	2.01306	3.45657e-12	1.80637	0.251401	1.07206	0.0130866	1.16814	0.37012	1.05569	1.79664e-09	1.68753	1.37315e-08	1.61533	0.129688	-1.09693	0.338418	1.05963	0.314104	1.07088
NM_172595 // Mm.79837 // brain| connective tissue| embryonic tissue| eye| heart| intest	NM_172595 // Arl15 // ADP-ribosylation factor-like 15 // 13 D2.2|13 // 218639 /// ENSMU	NM_172595	Arl15	785.286	1291.02	0.608266	9.04386e-15	-2.3802	2.06669e-08	-1.65328	0.0429755	-1.16186	0.133963	-1.11599	0.488208	-1.05146	0.287664	1.08036	0.00156642	-1.2761	0.0167169	-1.19637	0.635153	-1.03489	0.236757	-1.08998	0.85021	1.01373	0.0411306	-1.16352	0.0223876	-1.18594	3.21305e-05	-1.40075	0.866542	1.0122	0.00283927	1.29263	0.105718	1.14275	0.6223	-1.03625	0.0312463	-1.17378	0.24074	-1.10074
NM_177073 // Mm.40336 // bone marrow| brain| connective tissue| embryonic tissue| inner	NM_177073 // Relt // RELT tumor necrosis factor receptor // 7 E3|7 // 320100 /// ENSMUS	NM_177073	Relt	104.707	74.0481	1.41404	2.89084e-09	-2.37963	0.00207521	-1.45422	0.426093	1.09558	1.25778e-07	-2.07761	9.60047e-05	-1.63763	0.00448986	-1.40819	8.89312e-07	-1.93822	0.000439525	-1.54634	0.00516396	-1.39979	0.00601562	-1.39061	0.0011118	1.49125	0.00925927	1.36448	0.0267014	-1.2987	0.00767861	-1.37585	0.000191837	-1.59587	0.0424171	1.30677	0.000568023	1.61387	0.0195332	-1.31842	0.76457	-1.03482	0.0090317	-1.41968
NM_207625 // Mm.391337 // adrenal gland| bladder| blood| brain| connective tissue| dors	NM_207625 // Acsl4 // acyl-CoA synthetase long-chain family member 4 // X F2|X // 50790	NM_207625	Acsl4	1428.9	1112.43	1.28448	1.4958e-15	-2.37843	4.24549e-14	-2.17682	7.81368e-12	-1.91562	7.1477e-07	1.49044	4.72055e-10	1.74465	3.57244e-06	1.4405	2.15056e-06	-1.45609	0.0251906	-1.17056	3.4048e-05	-1.37256	2.61949e-06	-1.45001	8.40056e-05	1.34574	2.99262e-07	1.51813	0.360694	1.06457	0.607295	1.03567	0.00171404	-1.25588	0.217455	1.09997	0.000297969	1.35241	0.191691	-1.09404	0.645833	-1.03183	0.0239262	-1.19557
NM_001033399 // Mm.441399 // blood| brain| embryonic tissue| extraembryonic tissue| eye	NM_001033399 // Gfod1 // glucose-fructose oxidoreductase domain containing 1 // 13 A4|1	NM_001033399	Gfod1	120.133	96.7748	1.24137	9.33833e-10	-2.37624	4.02564e-05	-1.64934	0.296105	1.12133	0.00103488	1.46733	9.62786e-05	1.59975	0.774308	-1.03171	0.0271542	-1.28176	0.956166	-1.006	0.119893	-1.1876	0.21361	-1.1465	1.0037e-11	-2.80017	1.36963e-07	-2.00128	1.56455e-05	-1.70407	0.000184526	-1.56319	0.317507	1.11571	0.000381642	-1.6039	0.118818	-1.21382	0.339802	1.11015	0.224154	1.14289	0.1264	1.20896
NM_178589 // Mm.200792 // bladder| blood| bone| bone marrow| brain| embryonic tissue| e	NM_178589 // Tnfrsf21 // tumor necrosis factor receptor superfamily, member 21 // 17|17	NM_178589	Tnfrsf21	1827.62	461.389	3.96112	1.06193e-14	-2.37551	7.13799e-07	-1.52848	0.548912	-1.04444	1.5455e-06	-1.50215	2.27288e-05	-1.41333	0.479743	-1.05266	1.73556e-06	-1.49824	0.00135729	-1.28168	0.528402	-1.04681	0.461474	-1.05494	0.00207674	1.26778	6.78331e-07	1.53024	0.000168639	1.34884	0.000198659	1.34359	0.954863	1.00411	0.570989	-1.04726	0.667681	1.03557	0.130801	1.11739	0.999237	1.00007	0.226553	1.10438
NM_001099217 // Mm.482110 // bone marrow| embryonic tissue| intestine| lymph node| musc	NM_001099217 // Ly6c2 // lymphocyte antigen 6 complex, locus C2 // 15 D3|15 // 10004154	NM_001099217	Ly6c2	72.1399	38.5666	1.87053	0.00261938	-2.37378	0.00370779	-2.29365	0.0203047	-1.91657	0.742685	-1.09297	0.371201	1.27537	0.548375	1.1768	0.153236	-1.4794	0.176349	-1.4481	0.000540388	-2.75598	0.149024	-1.48558	0.763762	-1.08478	0.963457	-1.01248	0.867501	1.04619	0.433458	1.23714	0.413522	1.24887	0.164782	-1.53375	0.536164	-1.20751	0.841987	1.05544	0.153082	1.47962	0.0633526	1.78137
NM_001134480 // Mm.380993 // bone marrow| brain| embryonic tissue| eye| kidney| liver|	NM_001134480 // Plcxd2 // phosphatidylinositol-specific phospholipase C, X domain conta	NM_001134480	Plcxd2	521.928	62.218	8.3887	6.08164e-10	-2.37128	5.73877e-05	-1.61361	0.468842	-1.08064	7.24226e-08	-2.01661	0.000143567	-1.56326	0.589259	-1.05941	0.065536	-1.22249	0.222966	-1.1403	0.413471	-1.09159	0.699698	1.04206	0.00612397	1.35974	0.0985334	1.19653	0.000282161	1.52654	0.710926	1.04037	0.605794	1.05671	0.00542252	1.4202	0.19624	1.16956	0.000122042	1.57213	0.979803	1.0027	0.732021	1.04194
ENSMUST00000120095 // Mm.155573 // brain| embryonic tissue| eye| intestine| kidney| mam	ENSMUST00000120095 // Wdr31 // WD repeat domain 31 // 4|4 C1 // 71354 /// NM_023597 //	ENSMUST00000120095	Wdr31	92.7171	645.628	0.143608	1.7913e-11	-2.37122	1.69638e-07	-1.80035	1.13898e-06	-1.70374	0.999444	1.00006	0.0021609	1.35555	0.136262	1.15129	1.97986e-13	-2.74991	6.49466e-11	-2.27711	1.91953e-14	-2.98307	5.52969e-16	-3.39994	0.491586	-1.06641	0.24053	1.11669	0.0451904	-1.21122	0.450672	-1.07311	0.603287	1.04972	0.0169044	1.29654	0.00559165	1.35692	0.172886	1.13721	0.200857	1.12805	0.669657	1.04575
NM_001114339 // Mm.24742 // bone| bone marrow| brain| embryonic tissue| extraembryonic	NM_001114339 // Pank1 // pantothenate kinase 1 // 19 G1-G3|19 // 75735 /// NM_023792 //	NM_001114339	Pank1	92.0423	198.235	0.464308	2.98808e-06	-2.36996	0.00356474	-1.63395	0.276914	-1.19069	0.312087	-1.17598	0.24477	1.20553	0.295341	1.18281	0.39649	-1.14534	0.453378	1.12736	0.780706	-1.04537	0.58372	-1.0914	0.0213409	-1.46176	0.00896621	-1.54561	0.189312	-1.23547	0.000592544	-1.80724	0.0823199	-1.32613	0.510198	-1.12547	0.626662	-1.09111	0.492245	1.11598	0.252503	-1.20182	0.218317	-1.24922
NM_010206 // Mm.265716 // adipose tissue| bladder| bone| bone marrow| brain| connective	NM_010206 // Fgfr1 // fibroblast growth factor receptor 1 // 8 A2|8 10.0 cM // 14182 //	NM_010206	Fgfr1	758.623	438.125	1.73152	1.78499e-17	-2.36835	1.16239e-10	-1.66597	1.58773e-06	-1.39347	0.0718065	-1.11481	0.00404741	-1.19651	0.0646572	-1.11814	0.380012	1.05353	0.116183	-1.09896	0.51054	1.03977	0.747828	-1.0192	0.00175483	1.21812	0.836829	1.01225	7.94204e-06	1.3527	0.823766	-1.01325	0.0034782	-1.20047	9.94373e-06	-1.3976	0.166574	-1.09748	0.000174512	-1.27598	0.0301979	-1.14124	0.00497824	-1.21709
NM_146040 // Mm.281149 // bone| bone marrow| brain| embryonic tissue| eye| inner ear| i	NM_146040 // Cdca7l // cell division cycle associated 7 like // 12 F2|12 // 217946 ///	NM_146040	Cdca7l	244.596	760.482	0.321632	2.54644e-09	-2.36826	6.79061e-06	-1.79148	0.387934	-1.10299	0.0278402	-1.29242	0.983017	-1.00241	0.869124	1.01879	0.0597711	-1.24318	0.309547	1.12253	0.36371	1.10869	0.860672	1.02003	8.60197e-05	-1.63548	0.222851	-1.1492	0.00763845	-1.37143	0.529193	1.07388	0.186505	1.16295	0.497813	-1.09016	0.886214	1.01834	0.916281	1.01195	0.187436	1.16257	0.565704	1.07581
NM_148941 // Mm.83949 // bladder| brain| connective tissue| embryonic tissue| eye| mamm	NM_148941 // Elovl4 // elongation of very long chain fatty acids (FEN1/Elo2, SUR4/Elo3,	NM_148941	Elovl4	85.0117	328.477	0.258805	4.53948e-07	-2.36555	6.316e-07	-2.331	0.444152	-1.11648	5.5949e-05	-1.90486	0.00725248	-1.49757	0.0305978	-1.37684	1.20424e-05	-2.04294	1.51998e-05	-2.02155	5.4723e-07	-2.34594	9.00488e-07	-2.29445	0.294491	1.16352	0.00216983	1.59674	0.786617	1.03961	0.156125	1.22889	0.460607	-1.11206	0.281538	1.19109	0.296599	1.18461	0.131026	1.24588	0.65022	1.0673	0.750137	1.0527
ENSMUST00000101492 // Mm.333006 // brain| connective tissue| embryonic tissue| eye| fer	ENSMUST00000101492 // E330009J07Rik // RIKEN cDNA E330009J07 gene // 6 B1|6 // 243780 /	ENSMUST00000101492	E330009J07Rik	101.964	132.072	0.772032	2.20299e-10	-2.36484	1.42222e-10	-2.39997	0.00166944	-1.40899	0.0804662	-1.19984	0.760336	1.03168	0.111237	1.1799	1.77302e-05	-1.64277	0.000188599	-1.51994	0.00152464	-1.41361	2.47724e-05	-1.62509	0.503586	-1.07094	0.0462227	1.23247	0.0958314	-1.18917	0.338882	-1.10329	0.731277	-1.03574	0.488551	1.08303	0.0076838	1.37803	0.535182	1.06558	0.322038	1.10719	0.642508	1.05481
ENSMUST00000020113 // Mm.440656 // bladder| bone| bone marrow| brain| embryonic tissue|	ENSMUST00000020113 // Poc1b // POC1 centriolar protein homolog B (Chlamydomonas) // 10|	ENSMUST00000020113	Poc1b	317.764	325.441	0.976411	8.15878e-11	-2.36468	5.74703e-11	-2.39205	5.22973e-07	-1.79657	0.00747364	-1.31744	0.636264	1.04767	0.35055	1.0967	0.018158	-1.27244	0.942605	1.0071	0.00764426	-1.31631	0.0919053	-1.1839	8.70418e-10	2.19073	0.00135622	1.40097	0.48372	1.07152	0.441607	-1.07891	0.638518	1.04734	8.01906e-06	1.75828	0.000366825	1.53467	0.329888	-1.10119	0.480297	1.07211	0.364687	1.10592
NM_011290 // Mm.262021 // bladder| blood| bone| bone marrow| brain| dorsal root ganglio	NM_011290 // Rpl6 // ribosomal protein L6 // 5 F|5 // 19988 /// ENSMUST00000031617 // R	NM_011290	Rpl6	798.13	889.019	0.897765	0.000649474	-2.35948	0.0302459	-1.68321	0.511735	1.16571	0.00598373	-1.96049	0.0038491	-2.03739	0.259338	-1.30347	0.468638	-1.18466	0.356064	-1.24142	0.602	1.12947	0.865923	1.04014	0.219323	-1.33517	0.0941426	-1.48776	0.931272	-1.0203	0.393986	1.22089	0.853609	1.04395	0.145498	-1.47171	0.990271	1.0032	0.0541918	-1.58352	0.272246	1.29415	0.257166	-1.34875
ENSMUST00000015278 // Mm.140988 // brain| connective tissue| embryonic tissue| extraemb	ENSMUST00000015278 // Aldh1a3 // aldehyde dehydrogenase family 1, subfamily A3 // 7 C|7	ENSMUST00000015278	Aldh1a3	78.4198	32.542	2.40981	1.96364e-07	-2.35818	1.38833e-07	-2.39329	0.00517457	-1.49663	2.12318e-10	-3.17587	6.74204e-06	-2.02818	0.0337715	-1.34914	0.870107	-1.02266	0.271342	1.164	0.171609	1.2087	0.981335	1.00321	0.250207	1.17217	0.0492053	1.31824	0.370841	-1.13113	0.0325376	1.35216	0.61487	1.07147	0.0945344	-1.2996	0.40075	-1.13874	0.000131309	-1.78167	0.317091	-1.1479	0.817075	1.03625
NM_027769 // Mm.38390 // adrenal gland| bladder| blood| bone| bone marrow| brain| embry	NM_027769 // Cpne3 // copine III // 4 A3|4 // 70568 /// ENSMUST00000029885 // Cpne3 //	NM_027769	Cpne3	3265.53	923.239	3.53704	8.81757e-18	-2.35751	1.99828e-14	-1.96224	0.000109556	-1.27902	0.000710163	-1.23402	0.497536	-1.03994	0.351726	-1.05538	4.78339e-05	-1.29885	0.00709351	-1.1765	0.00624649	-1.17979	0.100277	-1.10107	0.0696254	1.1126	7.74447e-05	1.28732	0.283292	-1.0642	0.0234099	1.14446	0.436984	1.04594	0.132225	1.10385	0.000285757	1.29192	0.736466	-1.01957	0.00202276	1.20832	0.144688	1.10037
NM_009866 // Mm.1571 // bone| brain| dorsal root ganglion| embryonic tissue| extraembry	NM_009866 // Cdh11 // cadherin 11 // 8 D2|8 46.5 cM // 12552 /// ENSMUST00000075190 //	NM_009866	Cdh11	33.4771	36.7645	0.910583	0.00425482	-2.35212	0.00224726	-2.51278	0.0277372	-1.9043	0.961671	-1.01372	0.635345	1.14413	0.96588	1.0122	0.383858	-1.28159	0.661361	1.1324	0.62652	-1.14818	0.498608	-1.21218	0.5591	-1.18056	0.762482	-1.08952	0.518761	-1.20134	0.943758	1.0202	0.580047	-1.17021	0.511109	-1.23358	0.395143	-1.31279	0.486596	1.2188	0.363875	1.29539	0.40225	1.30741
NM_172409 // Mm.394427 // bladder| bone marrow| brain| embryonic tissue| extraembryonic	NM_172409 // Fmnl2 // formin-like 2 // 2 C1.1|2 // 71409 /// ENSMUST00000049483 // Fmnl	NM_172409	Fmnl2	152.225	382.435	0.398041	1.46324e-10	-2.35109	7.53306e-07	-1.79287	0.286543	-1.11319	0.209942	1.13486	0.0104238	1.30617	0.0638181	1.20842	0.0023297	-1.38168	0.00102803	-1.42212	9.30975e-05	-1.5408	0.000441236	-1.46378	0.470977	1.07492	0.250827	-1.12264	0.176101	1.14653	0.567541	-1.05889	0.306458	1.10831	0.551748	-1.06923	0.206138	1.15415	0.715592	-1.03709	0.0987472	1.18276	0.540438	1.07129
NM_010288 // Mm.378921 // adrenal gland| bone| bone marrow| brain| connective tissue| d	NM_010288 // Gja1 // gap junction protein, alpha 1 // 10 B4|10 29.0 cM // 14609 /// ENS	NM_010288	Gja1	108.813	3276.86	0.0332064	0.00142967	-2.34925	0.0014594	-2.345	0.14727	-1.44473	0.468696	-1.19971	0.703517	-1.10009	0.547749	1.16287	2.98188e-05	3.23945	0.000100009	2.9391	1.08042e-06	4.20279	1.88055e-08	5.76654	0.350995	1.26476	0.208942	1.37424	0.988812	-1.00352	0.843737	-1.05061	0.519153	-1.17571	0.10148	1.59831	0.159022	1.49397	0.307186	1.29364	0.80742	1.06297	0.631977	-1.1445
NM_176833 // Mm.230296 // blood| bone| brain| connective tissue| embryonic tissue| extr	NM_176833 // Ppm1f // protein phosphatase 1F (PP2C domain containing) // 16 A3|16 // 68	NM_176833	Ppm1f	586.197	356.058	1.64635	4.33844e-12	-2.34924	1.80848e-09	-1.96979	0.0457674	-1.19671	0.448263	-1.06894	0.478274	1.06429	0.75557	1.02766	0.0850083	-1.16625	0.945277	-1.00603	0.856028	-1.01602	0.674855	1.03747	0.00688893	-1.28186	0.000724479	-1.37626	0.0114592	1.25978	0.774116	1.02547	0.588266	1.04865	0.000235783	-1.48589	0.00787338	-1.31515	0.569915	1.05113	0.671478	1.03789	0.885864	1.01423
NM_183024 // Mm.185636 // bone marrow| brain| embryonic tissue| eye| fertilized ovum| l	NM_183024 // Raver2 // ribonucleoprotein, PTB-binding 2 // 4 C6|4 // 242570 /// ENSMUST	NM_183024	Raver2	169.207	329.355	0.513753	2.57291e-07	-2.34884	0.000262715	-1.73527	0.52565	-1.09192	0.897341	1.01799	0.115585	1.24732	0.200261	1.1959	2.60109e-05	-1.92445	0.00190784	-1.57967	0.00283905	-1.54876	5.58035e-05	-1.86073	0.0237707	1.38137	9.02965e-06	2.01533	0.518629	-1.09356	0.914821	-1.01489	0.698979	-1.05495	0.000974555	1.73387	0.00277591	1.63689	0.0922172	1.26749	0.373683	-1.13153	0.768635	1.04676
NM_009801 // Mm.1186 // bladder| blood| bone| bone marrow| brain| embryonic tissue| ext	NM_009801 // Car2 // carbonic anhydrase 2 // 3 A1|3 10.5 cM // 12349 /// ENSMUST0000002	NM_009801	Car2	2813.26	2680.9	1.04937	5.23871e-15	-2.34426	2.68553e-18	-2.93135	1.46023e-05	-1.4088	3.64494e-13	-2.09725	4.87521e-06	-1.443	0.795708	-1.01821	0.000222367	-1.32537	0.00610285	-1.2223	0.920222	-1.007	0.145056	-1.10842	0.234592	1.08716	0.124857	1.11468	0.00025661	1.321	0.838944	-1.01426	0.00425669	-1.23388	0.000378642	-1.35344	0.747331	1.02556	0.295926	-1.07609	0.368298	-1.06503	0.0295758	-1.19205
NM_009528 // Mm.306946 // bladder| brain| embryonic tissue| extraembryonic tissue| eye|	NM_009528 // Wnt7b // wingless-related MMTV integration site 7B // 15 E2|15 46.9 cM //	NM_009528	Wnt7b	817.336	116.428	7.02012	5.84153e-09	-2.33987	0.0012401	-1.49089	0.829012	1.02525	0.846532	-1.02259	0.801544	-1.02945	0.86742	1.01946	0.202262	-1.16036	0.111104	-1.20556	0.436617	1.09432	0.277333	-1.13466	0.83566	1.02424	0.00494755	-1.4073	0.487804	-1.08364	8.31557e-08	-2.12486	3.18943e-06	-1.86413	1.17245e-06	-2.09628	0.0166995	-1.3802	2.94918e-09	-2.3994	6.07084e-08	-2.14909	9.95896e-06	-1.92241
NM_001114332 // Mm.186778 // blood| bone| bone marrow| brain| embryonic tissue| heart|	NM_001114332 // Slc16a10 // solute carrier family 16 (monocarboxylic acid transporters)	NM_001114332	Slc16a10	148.674	129.049	1.15207	5.98489e-10	-2.33942	2.80184e-12	-2.82794	3.0305e-05	-1.63574	6.60962e-05	1.59346	0.383437	1.09629	0.165514	-1.1588	0.0538011	1.23045	0.826164	1.02333	0.782822	-1.02937	0.195028	1.14741	2.02668e-12	2.86191	3.67966e-15	3.6625	0.524555	-1.06926	0.0208014	1.28565	0.000151994	-1.54889	2.52056e-14	3.93813	4.62304e-14	3.83301	0.0980647	1.19334	0.0402646	1.24767	8.70189e-05	-1.67034
NM_194355 // Mm.208723 // bone| bone marrow| brain| dorsal root ganglion| embryonic tis	NM_194355 // Spire1 // spire homolog 1 (Drosophila) // 18 E1|18 // 68166 /// ENSMUST000	NM_194355	Spire1	503.249	369.464	1.36211	3.0526e-08	-2.33771	3.55049e-05	-1.77793	0.00461166	-1.44858	0.862503	1.02172	0.126017	1.21257	0.378427	1.11609	0.000218462	-1.65269	0.0961013	-1.23395	0.0376525	-1.30381	0.330905	-1.12905	0.0167915	1.36073	0.000163302	1.67245	0.216249	-1.16761	0.203417	-1.17289	0.0179706	-1.35603	0.000881656	1.64697	5.67976e-06	2.06924	0.398334	-1.11102	0.480481	-1.09179	0.00259704	-1.56173
NM_008515 // Mm.45039 // bladder| bone| bone marrow| brain| connective tissue| embryoni	NM_008515 // Lrrfip1 // leucine rich repeat (in FLII) interacting protein 1 // 1 D|1 //	NM_008515	Lrrfip1	461.688	80.0151	5.77001	1.5031e-11	-2.33763	0.0177253	-1.25117	0.179241	1.13175	0.0334501	-1.22079	0.00702045	-1.29376	0.157296	-1.13938	0.25275	1.11077	0.108243	-1.16039	0.269793	1.10661	0.769309	-1.02709	0.00073	1.39356	0.000578488	1.40367	0.919298	-1.00927	0.0737672	-1.1809	0.000240469	-1.44181	0.0963277	1.18918	0.0025656	1.38775	0.241288	-1.11369	0.201623	-1.12472	0.00459968	-1.35765
ENSMUST00000095097 // Mm.354634 // eye| thyroid| juvenile| adult	ENSMUST00000095097 // Foxe1 // forkhead box E1 // 4 B1|4 21.5 cM // 110805	ENSMUST00000095097	Foxe1	39.1857	35.7589	1.09583	1.72474e-08	-2.332	9.03524e-09	-2.39008	0.000499238	-1.57597	0.0559922	-1.26611	0.151982	-1.19128	0.644591	-1.05727	0.0270566	-1.31676	0.0134982	-1.3634	0.094525	-1.22786	0.0806331	-1.23967	0.341896	-1.12216	0.816245	1.02842	0.936227	-1.00969	0.250324	1.15002	0.504549	1.08403	0.594819	1.07485	0.908749	-1.01565	0.471479	1.09101	0.963297	1.00556	0.94117	-1.01005
NM_026138 // Mm.390264 // adrenal gland| brain| dorsal root ganglion| embryonic tissue|	NM_026138 // 6330407J23Rik // RIKEN cDNA 6330407J23 gene // 10 A4|10 // 67412 /// ENSMU	NM_026138	6330407J23Rik	143.688	74.196	1.9366	1.53924e-05	-2.33072	1.66235e-06	-2.62829	0.00320007	-1.7139	9.15997e-08	-3.07061	0.00032238	-1.96706	0.53646	1.11288	0.0105981	-1.58471	0.000779972	-1.86813	0.421916	-1.14933	0.684052	-1.07284	7.85881e-16	-9.40501	5.39833e-09	-3.58065	0.408486	1.15406	0.00859409	1.60733	4.85599e-05	2.1884	1.06195e-12	-7.29379	2.00744e-11	-5.98257	0.0258351	1.48787	0.821769	-1.03966	0.000226124	2.18805
NM_134028 // Mm.142348 // blood| bone marrow| brain| embryonic tissue| eye| fertilized	NM_134028 // Tubg2 // tubulin, gamma 2 // 11 D|11 // 103768 /// ENSMUST00000043654 // T	NM_134028	Tubg2	66.9726	64.2222	1.04283	2.15364e-06	-2.3299	6.16042e-06	-2.21569	0.000644641	-1.75943	0.289161	1.1778	0.163764	1.24127	0.958702	-1.00797	0.403303	1.13732	0.0744748	1.32195	0.0360203	1.39198	0.0625548	1.33906	0.0069823	1.54302	3.98011e-06	2.26254	0.0125898	-1.48941	0.47268	-1.11676	0.930281	1.0135	1.97518e-08	3.32739	1.33726e-07	3.00163	0.814187	1.03669	0.294558	-1.17562	0.0684651	-1.37799
NM_010284 // Mm.3986 // adrenal gland| bone| bone marrow| brain| connective tissue| emb	NM_010284 // Ghr // growth hormone receptor // 15 A1|15 4.6 cM // 14600 /// ENSMUST0000	NM_010284	Ghr	275.011	109.592	2.50941	8.60784e-06	-2.32631	0.000199804	-1.96815	0.0386482	-1.42335	2.4477e-05	-2.20245	0.00212664	-1.72078	0.272646	-1.20146	0.0241894	-1.47234	0.0826993	-1.34147	0.752315	-1.05382	0.519869	1.11307	0.0779953	1.34792	0.0142923	1.52656	0.00834185	-1.58155	0.329679	-1.17682	0.000969049	-1.80164	0.228934	1.25424	0.02276	1.5519	0.860707	-1.02956	0.0376536	1.4261	0.639863	-1.09133
NR_028425 // Mm.441426 // embryonic tissue| cleavage| blastocyst	NR_029642 // Mir292 // microRNA 292 // 7|7 // 100049711 /// NR_029645 // Mir295 // micr	NR_029642	Mir292	486.578	447.204	1.08804	3.66158e-06	-2.32566	0.223496	-1.21382	0.479746	1.11827	3.44971e-05	-2.08065	8.4603e-09	-3.13551	0.130536	-1.27374	0.0579107	-1.3581	0.000524223	-1.80809	0.00836017	1.54532	0.419549	1.13633	0.0219666	-1.45328	6.97159e-06	-2.25301	0.000837851	1.76301	0.355231	-1.15785	0.56841	1.0943	2.57493e-05	-2.31573	0.000271336	-2.02306	0.451942	-1.1264	0.106213	-1.29571	0.464482	-1.13886
ENSMUST00000019608 // Mm.474430 // brain| embryonic tissue| extraembryonic tissue| eye|	ENSMUST00000019608 // Ptger1 // prostaglandin E receptor 1 (subtype EP1) // 8 C2|8 38.0	ENSMUST00000019608	Ptger1	294.153	215.816	1.36298	1.01687e-12	-2.32295	2.06787e-09	-1.88169	0.0841336	-1.15562	0.0186921	1.22173	0.0989981	1.14788	0.95175	-1.00498	3.85113e-12	2.23514	2.0873e-11	2.13091	6.77465e-13	2.35081	5.27348e-15	2.72963	1.65843e-09	1.89267	2.8062e-08	1.75818	0.0111909	-1.24275	0.271576	1.09528	0.598225	1.04431	5.25048e-05	1.51658	0.0143249	1.265	0.00229889	-1.30505	0.426474	-1.06778	0.0236245	1.24107
NM_013825 // Mm.2074 // bone| bone marrow| embryonic tissue| eye| heart| inner ear| liv	NM_013825 // Ly75 // lymphocyte antigen 75 // 2 C1.1|2 // 17076 /// ENSMUST00000028362	NM_013825	Ly75	82.3837	419.507	0.196382	1.63594e-05	-2.32152	0.00204469	-1.76171	0.00393016	-1.69102	1.1795e-06	-2.67514	0.0923459	-1.34403	0.986585	1.0029	0.926114	-1.01612	0.0462403	1.423	0.19513	1.25341	0.0108301	1.58182	0.553676	-1.10779	0.333346	-1.18275	1.12805e-07	-3.03386	0.000125941	-2.07401	0.232405	1.23104	0.00285041	1.84611	0.104139	1.37762	0.085116	-1.35352	0.387956	-1.16137	0.127846	1.34922
ENSMUST00000037872 // Mm.20437 // brain| embryonic tissue| extraembryonic tissue| eye|	ENSMUST00000037872 // Dnajb5 // DnaJ (Hsp40) homolog, subfamily B, member 5 // 4|4 B1 /	ENSMUST00000037872	Dnajb5	82.434	99.5066	0.828427	9.75878e-13	-2.32112	3.01979e-07	-1.65235	0.03403	-1.19585	0.0096328	-1.24815	0.137321	-1.13146	0.72667	-1.02908	0.0283717	-1.20364	0.194597	-1.11343	0.454094	-1.06349	0.221702	-1.10639	7.31373e-07	-1.61557	5.83324e-10	-1.94284	0.00649223	-1.26384	2.78199e-07	-1.65581	0.446196	-1.06466	0.131734	-1.15123	0.00659851	-1.30022	0.193875	1.11363	0.227888	-1.10488	0.517674	-1.06154
NM_001110843 // Mm.159842 // adrenal gland| bladder| bone| brain| dorsal root ganglion|	NM_001110843 // Cacna2d1 // calcium channel, voltage-dependent, alpha2/delta subunit 1	NM_001110843	Cacna2d1	68.2138	103.076	0.661779	1.90624e-08	-2.31836	1.11036e-07	-2.16958	0.00222149	-1.47894	0.0152852	-1.35415	0.207931	-1.16533	0.0603866	-1.25999	0.000606595	-1.56175	0.136348	-1.1993	0.00165015	-1.4979	0.000593453	-1.56315	8.81844e-09	2.38717	2.89387e-06	1.92054	4.95517e-05	1.72452	0.00720269	1.4034	0.140777	-1.1968	0.000621444	1.64839	0.0148763	1.40795	0.427141	1.10064	0.675948	-1.05161	0.0615939	-1.29486
ENSMUST00000025319 // Mm.27131 // bone marrow| brain| embryonic tissue| extraembryonic	ENSMUST00000025319 // Rpp21 // ribonuclease P 21 subunit (human) // 17|17 B3 // 67676 /	ENSMUST00000025319	Rpp21	199.547	131.771	1.51435	2.74452e-06	-2.31634	0.0283102	-1.41799	0.78424	-1.04318	0.595529	1.08553	0.836681	1.03233	0.329771	1.16338	0.122526	-1.27384	0.163987	-1.24297	0.977545	-1.00435	0.0623773	-1.34203	0.417942	1.13375	0.209531	-1.21609	0.0542121	1.35576	0.134677	-1.26394	0.36381	-1.1513	0.0747456	1.37089	0.499538	1.1246	0.0834354	1.31313	0.356595	-1.15379	0.0417253	-1.43731
NM_001113421 // Mm.331064 // bladder| bone| brain| connective tissue| dorsal root gangl	NM_001113421 // Schip1 // schwannomin interacting protein 1 // 3|3 E2 // 30953 /// NM_0	NM_001113421	Schip1	217.858	272.626	0.799107	4.06805e-12	-2.31408	4.71863e-08	-1.77855	0.016421	-1.23849	0.494186	-1.06063	0.165453	1.12812	0.207837	1.11543	0.0216132	-1.22645	0.714717	1.0319	0.180491	-1.12334	0.0557499	-1.18315	0.00387593	-1.29944	0.604953	-1.04549	0.210459	-1.11472	0.002748	-1.31356	0.448907	-1.06742	0.952016	1.00582	0.0105129	1.29384	0.152574	1.13251	0.950379	-1.00536	0.303444	-1.10511
AY149175 // Mm.425832 // embryonic tissue| testis /// AY149175 // Mm.425832 // embryoni	AY149175 // Zfp640 // zinc finger protein 640 // 13 B3|13 // 386626 /// AY149175 // Zfp	AY149175	Zfp640	949.869	6407.3	0.148248	7.28922e-07	-2.31381	0.000561729	-1.70718	0.871153	-1.02351	0.0481492	-1.33698	0.252329	-1.17987	0.261122	-1.17624	0.000985856	-1.66065	0.802923	-1.03642	0.0486783	-1.33602	0.912171	1.01593	0.0267086	-1.38793	0.0569282	-1.32219	0.138619	1.24014	0.00435671	1.53872	0.165616	1.22278	0.000745618	-1.79571	0.00309204	-1.65625	0.871394	-1.02347	0.122279	1.25214	0.176268	1.24645
NR_033625 // Mm.394705 // brain| liver| thymus| fetus| juvenile| adult /// NR_033625 //	NR_033625 // D5Ertd605e // DNA segment, Chr 5, ERATO Doi 605, expressed // 5 G3|5 82.0	NR_033625	D5Ertd605e	385.824	150.847	2.55772	3.02106e-09	-2.31149	0.0217289	-1.3005	0.169315	-1.16636	3.95779e-09	2.28956	1.43389e-06	1.86705	0.000713295	1.49763	0.645525	-1.05226	0.0197418	-1.30628	0.035319	-1.27076	0.12642	-1.18724	2.78193e-13	3.27606	2.81646e-09	2.31723	1.37334e-16	4.55481	1.10463e-13	3.40127	0.131024	1.18473	0.0318221	-1.31644	0.888684	1.01755	0.1539	1.17328	4.2804e-05	1.65924	0.0319564	1.31614
NM_207205 // Mm.489667 // bladder| bone| brain| dorsal root ganglion| embryonic tissue|	NM_207205 // Igsf3 // immunoglobulin superfamily, member 3 // 3 F2.2|3 48.5 cM // 78908	NM_207205	Igsf3	804.921	271.436	2.96541	3.15001e-10	-2.30943	2.1998e-05	-1.62037	0.0148742	-1.29063	0.000117031	1.53515	0.000183534	1.51255	0.0253306	1.26217	0.18588	-1.14433	0.495536	1.07131	0.381791	-1.0926	0.359306	-1.09732	2.95362e-06	1.7266	8.32953e-05	1.55232	0.0121264	1.30136	0.040528	1.23631	0.514812	-1.06803	0.0783426	1.22553	0.0118757	1.3457	0.0378985	-1.24005	0.510535	-1.06875	0.0808805	-1.22335
NM_175353 // Mm.24865 // bladder| blood| bone| bone marrow| brain| embryonic tissue| ex	NM_175353 // Exoc6 // exocyst complex component 6 // 19 C2|19 26.0 cM // 107371 /// ENS	NM_175353	Exoc6	1189.56	1300.63	0.914599	3.03883e-18	-2.30868	2.14176e-15	-1.98273	2.7735e-07	-1.39774	0.00263608	1.18965	0.00360522	1.18228	0.804504	1.01356	9.59656e-13	-1.74957	1.39692e-09	-1.53046	6.29507e-15	-1.93737	3.72583e-09	-1.50452	4.06005e-07	1.38876	5.30066e-07	1.38252	0.0455187	1.11814	2.82119e-05	1.29211	0.790416	1.01457	0.00160404	1.22873	0.000681213	1.25128	0.925558	-1.0051	0.00467055	1.17612	0.741856	1.02035
NM_178798 // Mm.46749 // bladder| blood| bone marrow| brain| connective tissue| dorsal	NM_178798 // Slc7a6 // solute carrier family 7 (cationic amino acid transporter, y+ sys	NM_178798	Slc7a6	1692.1	1236.29	1.36869	2.52435e-18	-2.30812	1.41666e-09	-1.52633	0.0101654	-1.15623	0.000376294	-1.23271	0.0390477	-1.12161	0.576779	1.03071	0.595781	-1.02916	0.347427	-1.05244	0.696161	-1.02137	0.0243331	-1.13417	0.0322475	-1.12675	0.466858	-1.04028	0.66464	-1.02375	0.0089379	-1.15939	0.00220288	-1.19262	0.00450128	-1.19968	0.604802	1.032	0.11226	-1.09124	0.154509	-1.08115	0.00555243	-1.19396
NR_038050 // Mm.440198 // brain| connective tissue| kidney| liver| ovary| spleen| testi	NR_038050 // D130020L05Rik // RIKEN cDNA D130020L05 gene // 12 E|12 // 319760 /// NR_03	NR_038050	D130020L05Rik	53.567	61.3295	0.873429	7.58938e-06	-2.30722	0.000671488	-1.82036	0.325409	-1.17518	0.516536	1.11194	0.0555773	-1.37688	0.221067	1.22331	0.845183	1.03237	0.0340104	-1.42777	0.715435	-1.06133	0.304936	-1.18352	0.138125	-1.27808	0.00385087	-1.64563	0.543839	1.10434	0.444916	-1.13324	0.836286	1.03429	0.421413	1.15948	0.939477	1.01401	0.880086	1.02492	0.620011	-1.08438	0.0220582	-1.54381
---	NM_001177525 // EU599041 // expressed sequence EU599041 // --- // 100170401 /// NM_0011	NM_001177525	EU599041	187.049	1117.22	0.167423	1.13365e-06	-2.30705	0.0210832	-1.41786	0.0788869	-1.29967	0.00831648	-1.49761	0.0907967	-1.28646	0.573553	-1.08594	4.44112e-07	-2.40735	6.83267e-07	-2.36071	1.08099e-08	-2.8529	1.82637e-06	-2.25757	0.0116617	-1.46882	0.491687	-1.10609	0.150652	1.23733	0.0107039	1.47613	0.0519305	1.3381	0.00385973	-1.65117	0.656262	-1.07595	0.52177	1.09845	0.00682123	1.51442	0.0841935	1.3354
ENSMUST00000028129 // Mm.305754 // bladder| bone marrow| brain| embryonic tissue| extra	ENSMUST00000028129 // Slc2a8 // solute carrier family 2, (facilitated glucose transport	ENSMUST00000028129	Slc2a8	192.602	203.628	0.945855	1.65708e-09	-2.30666	2.51826e-05	-1.66656	0.00872086	-1.34345	0.00114432	1.45548	0.000744175	1.47895	0.00702079	1.35561	0.00716614	-1.35447	0.007361	-1.35297	0.00379573	-1.38976	3.11775e-05	-1.65444	0.0617963	-1.22824	0.328995	-1.11146	0.0785679	-1.21302	0.00612561	-1.36323	0.783117	-1.03007	0.462135	1.09331	0.0271817	1.31745	0.75939	1.03352	0.979081	1.00283	0.417986	-1.10333
ENSMUST00000155364 // Mm.288510 // bone| bone marrow| brain| embryonic tissue| extraemb	ENSMUST00000155364 // Brp44l // brain protein 44-like // 17 A1|17 7.8 cM // 55951 /// N	ENSMUST00000155364	Brp44l	61.5203	60.3725	1.01901	8.66582e-11	-2.30642	2.04146e-10	-2.24464	5.79618e-06	-1.64633	0.0061585	-1.31706	0.222065	-1.12523	0.0971966	-1.17538	0.460892	-1.07338	0.371315	1.0898	0.435364	-1.07782	0.582337	1.05415	0.651691	-1.0442	0.235787	-1.12131	0.522039	1.06335	0.279046	1.11002	0.29122	1.10709	0.889481	-1.01506	0.0934957	-1.20163	0.617315	1.04906	0.944565	-1.00668	0.578309	1.06172
NM_027419 // Mm.272859 // brain| embryonic tissue| eye| intestine| lung| mammary gland|	NM_027419 // 2810408A11Rik // RIKEN cDNA 2810408A11 gene // 11|11 // 70419 /// ENSMUST0	NM_027419	2810408A11Rik	156.685	215.534	0.726963	1.98439e-11	-2.30584	1.80728e-11	-2.31249	5.33548e-08	-1.82895	1.48537e-07	1.77683	2.10853e-07	1.75938	0.00010227	1.47559	1.34794e-08	-1.90188	1.77795e-09	-2.01614	2.16659e-08	-1.87633	3.96069e-09	-1.96991	0.000592462	1.39977	0.00483447	1.30838	0.029939	-1.22468	0.000680159	-1.39382	0.363287	1.08626	2.76495e-06	1.73919	3.77224e-05	1.59966	0.930769	-1.0079	0.0961796	-1.16573	0.553269	1.06231
NM_001177753 // Mm.490335 // blood| bone| bone marrow| brain| connective tissue| embryo	NM_001177753 // Pfkfb3 // 6-phosphofructo-2-kinase/fructose-2,6-biphosphatase 3 // 2 A1	NM_001177753	Pfkfb3	230.363	102.894	2.23885	9.22983e-08	-2.30488	0.0170151	-1.37482	0.711442	-1.04873	3.92747e-07	2.17521	0.00966631	1.41547	0.00668898	1.44163	0.473178	-1.0969	0.00156976	-1.54347	0.748699	1.04205	0.291476	-1.1463	0.00256448	1.50908	0.224477	1.17069	0.0679032	-1.27094	0.00736786	-1.43478	0.184189	-1.18841	0.225169	1.1934	0.217549	1.19699	0.0029669	-1.49886	0.0415785	-1.30873	0.477619	-1.10835
ENSMUST00000047632 // Mm.245577 // bladder| bone marrow| brain| connective tissue| dors	ENSMUST00000047632 // Surf6 // surfeit gene 6 // 2 A3|2 15.5 cM // 20935 /// NM_009298	ENSMUST00000047632	Surf6	131.033	148.638	0.881555	3.05118e-14	-2.30304	3.18493e-13	-2.16273	9.23403e-05	-1.36726	1.63296e-05	-1.42302	0.00555278	-1.23453	0.215227	-1.09462	6.32668e-06	-1.45398	8.50866e-05	-1.36988	0.0996678	-1.12867	0.000148338	-1.3521	6.83266e-05	-1.3769	0.0405232	-1.16423	0.110481	1.12435	0.584827	1.04033	0.684065	1.02986	0.687413	1.03323	0.7914	-1.02171	2.6393e-06	1.48293	0.19598	1.09902	0.569261	-1.04737
NM_146178 // Mm.482157 // brain| embryonic tissue| eye| fertilized ovum| inner ear| lun	NM_146178 // Ccdc106 // coiled-coil domain containing 106 // 7 A1|7 // 232821 /// ENSMU	NM_146178	Ccdc106	62.5994	82.1569	0.76195	4.64816e-07	-2.30241	0.000182247	-1.77107	0.0884477	-1.27317	0.199183	1.19784	0.531793	1.09111	0.253448	1.17376	0.0189606	-1.40266	0.00030906	-1.72851	0.0153201	-1.41985	0.000151381	-1.78613	0.0571707	-1.31114	0.335134	-1.1444	0.845092	1.02756	0.675683	1.05999	0.965912	-1.00596	0.487256	-1.11507	0.283873	-1.18383	0.330826	1.1458	0.836748	-1.02909	0.706039	-1.06078
NR_028265 // Mm.260543 // brain| embryonic tissue| extraembryonic tissue| eye| pancreas	NR_028265 // Mirg // miRNA containing gene // 12 F1|12 // 100040724 /// NR_030272 // Mi	NR_028265	Mirg	183.468	221.19	0.829462	5.58974e-08	-2.30111	3.56651e-07	-2.14064	0.00468001	-1.45261	0.0518604	-1.28348	0.0345266	-1.31334	0.316108	1.1347	0.000793546	1.57261	0.0166399	1.36529	7.38079e-05	1.73576	0.0628664	1.26905	0.000118496	-1.70272	2.09519e-05	-1.82543	0.784119	1.03492	0.208131	-1.17265	0.87747	1.0195	0.0759844	-1.2903	0.944006	1.00993	0.0508215	1.28498	0.00316212	1.4792	0.767499	-1.0425
ENSMUST00000006112 // Mm.6972 // bone| bone marrow| brain| embryonic tissue| extraembry	ENSMUST00000006112 // Ephb3 // Eph receptor B3 // 16|16 B1-B4 // 13845 /// NM_010143 //	ENSMUST00000006112	Ephb3	144.757	269.868	0.536399	2.37188e-16	-2.29993	4.41759e-09	-1.58504	0.0229976	1.1564	6.89835e-06	-1.37511	0.0614218	-1.12551	0.918694	1.00633	0.0064308	-1.19339	0.0965671	-1.1102	0.666135	-1.02705	0.866598	1.01044	8.97991e-07	1.43017	0.02863	1.14973	0.153268	1.09354	0.0210953	-1.15899	0.00484017	-1.20133	1.59382e-07	1.55165	0.000300202	1.31496	0.0229081	1.15651	0.530931	-1.03958	0.00433425	-1.2324
---	NR_035417 // Mir669i // microRNA 669i // --- // 100316668	NR_035417	Mir669i	895.853	304.935	2.93785	0.00317067	-2.29882	0.169009	-1.449	0.514929	-1.18996	3.47116e-06	-4.17994	0.000108563	-3.12539	0.621476	1.14079	0.440566	-1.22902	0.629341	-1.13741	0.297579	1.32234	0.248988	-1.36304	0.000863224	-2.59917	0.00225707	-2.37546	0.0137028	1.98031	0.253994	-1.35853	0.378394	-1.26592	5.71735e-05	-3.82831	0.150302	-1.54702	0.787007	1.07466	0.70322	-1.10691	0.130097	-1.5838
ENSMUST00000161502 // Mm.334477 // bladder| bone marrow| brain| connective tissue| embr	ENSMUST00000161502 // Fut10 // fucosyltransferase 10 // 8 A3|8 // 171167 /// ENSMUST000	ENSMUST00000161502	Fut10	162.424	49.0285	3.31285	1.65516e-10	-2.29638	8.92853e-06	-1.64087	0.146001	-1.1547	0.00295389	-1.36004	0.00792531	-1.31184	0.281314	-1.11175	0.0521766	-1.21436	0.0252544	-1.25312	0.40418	-1.08521	0.255349	-1.11845	0.0996715	-1.17768	0.44693	-1.07735	0.0484061	-1.21846	0.135211	-1.15942	0.445169	-1.07766	0.00410055	-1.39419	0.914401	-1.01186	0.0591	-1.20748	0.345378	1.09705	0.350137	1.10853
NM_001168502 // Mm.305561 // brain| embryonic tissue| eye| fertilized ovum| inner ear|	NM_001168502 // Zfp57 // zinc finger protein 57 // 17 B3|17 // 22715 /// ENSMUST0000008	NM_001168502	Zfp57	388.81	758.329	0.512719	1.00296e-11	-2.29551	6.56977e-07	-1.6771	0.0491915	-1.19382	0.00262422	-1.32379	6.55506e-06	-1.57483	0.349281	1.08618	0.543015	-1.05501	0.000466737	-1.39565	0.0667381	1.1789	0.0519647	-1.19117	6.40797e-14	-2.69073	1.34401e-15	-3.06919	0.43825	1.07073	2.29861e-08	-1.83837	0.0146846	1.2496	1.19858e-07	-1.88358	7.11882e-07	-1.7834	0.0236285	1.22817	0.00224539	-1.33034	0.972709	1.00338
NM_146257 // Mm.125942 // brain| embryonic tissue| eye| heart| mammary gland| pituitary	NM_146257 // Slc29a4 // solute carrier family 29 (nucleoside transporters), member 4 //	NM_146257	Slc29a4	108.154	290.123	0.372786	1.7693e-11	-2.29456	6.07753e-08	-1.81126	0.121185	-1.15151	2.82321e-10	-2.112	1.00552e-06	-1.67495	0.086577	-1.16946	2.88155e-07	-1.73425	1.49903e-05	-1.55292	0.0607662	-1.18761	1.22814e-05	-1.56168	0.00170152	-1.35003	0.450739	1.07019	0.0682881	-1.18171	0.207041	-1.12103	0.0244139	1.23181	0.00324341	1.36868	3.76317e-05	1.59225	8.47799e-05	1.47786	0.0149861	1.25438	0.136611	1.16423
NM_020490 // Mm.159670 // heart| liver| thymus| vagina| fetus| adult /// ENSMUST0000004	NM_020490 // Ltb4r2 // leukotriene B4 receptor 2 // 14|14 C1 // 57260 /// ENSMUST000000	NM_020490	Ltb4r2	79.693	66.7053	1.1947	1.35243e-10	-2.29325	0.00315533	-1.35296	0.00010336	1.51461	0.00248453	1.36436	5.34992e-05	1.54605	0.0108205	1.29318	0.420659	1.08131	0.00958922	1.29914	0.127605	1.1613	0.876848	1.0151	0.00735191	-1.31216	0.33111	-1.09915	0.0363377	-1.2315	0.00332567	1.35045	0.793364	-1.02566	0.219607	-1.14414	0.000166644	-1.56759	0.86513	-1.01656	0.99813	1.00023	0.786345	1.0299
NM_013614 // Mm.34102 // adrenal gland| bladder| blood| bone| bone marrow| brain| conne	NM_013614 // Odc1 // ornithine decarboxylase, structural 1 // 12 A1.1|12 6.0 cM // 1826	NM_013614	Odc1	2509.84	2678.11	0.937167	6.30076e-18	-2.29231	1.04708e-14	-1.93326	0.0417694	-1.1222	0.000116779	-1.2643	0.327393	-1.05582	0.641887	-1.026	0.0364586	-1.12597	0.158479	1.08192	0.34204	1.05409	0.889002	-1.00772	9.98266e-06	-1.32018	0.00183872	-1.20091	0.471376	-1.04064	0.231349	1.06886	0.788583	1.0149	2.3074e-05	-1.34411	0.021913	-1.15825	0.241359	-1.06733	0.0894033	1.1001	0.904556	1.00745
NM_010111 // Mm.209813 // bladder| brain| dorsal root ganglion| embryonic tissue| extra	NM_010111 // Efnb2 // ephrin B2 // 8 A1.1|8 2.0 cM // 13642 /// ENSMUST00000001319 // E	NM_010111	Efnb2	946.006	176.686	5.35418	1.49618e-07	-2.29216	1.24883e-05	-1.91426	0.0113838	-1.41186	0.000102705	-1.75321	0.0335327	-1.33123	0.187609	-1.19023	0.000116136	-1.74408	0.104783	-1.24065	0.0992157	-1.2452	0.277897	-1.15359	0.00264881	-1.51731	0.00892992	-1.4296	0.675085	1.05637	0.204225	-1.18253	0.0925568	-1.25094	0.0045553	-1.55152	0.0245917	-1.40655	0.63938	-1.06324	0.0663461	-1.27797	0.0355114	-1.37405
ENSMUST00000043204 // Mm.311026 // adrenal gland| bone| brain| embryonic tissue| eye| i	ENSMUST00000043204 // Fbxo33 // F-box protein 33 // 12 C1|12 // 70611 /// NM_001033156	ENSMUST00000043204	Fbxo33	431.88	299.986	1.43967	1.8995e-16	-2.29181	2.42249e-15	-2.15086	4.51503e-06	-1.38142	1.72143e-12	-1.85089	1.42299e-10	-1.68804	3.27178e-05	-1.32976	5.15574e-05	-1.318	0.00296338	-1.21224	0.0056076	-1.19485	0.0976938	-1.10852	0.000394186	-1.26544	4.83922e-05	-1.31964	0.934608	1.00503	0.0204886	-1.15797	0.399677	1.05306	0.0125686	-1.19543	0.0382584	-1.15756	0.416742	1.0511	0.650527	-1.02811	0.564891	1.0404
NM_009390 // Mm.438712 // embryonic tissue| eye| fertilized ovum| intestine| ovary| ski	NM_009390 // Tll1 // tolloid-like // 8 B3.1|8 32.4 cM // 21892 /// ENSMUST00000066166 /	NM_009390	Tll1	21.5662	24.0081	0.898287	0.00152174	-2.29149	0.000803251	-2.41966	0.00312819	-2.15104	0.960758	-1.01211	0.929077	-1.02202	0.87981	1.0377	0.676245	-1.10772	0.711876	-1.09468	0.784906	-1.0691	0.856151	-1.04537	0.859203	1.04437	0.98754	1.00383	0.873285	-1.03981	0.819892	-1.05732	0.969143	-1.00951	0.63969	-1.13757	0.995141	1.00168	0.64822	-1.11828	0.864802	1.04255	0.743351	1.09427
NM_030750 // Mm.280199 // adrenal gland| bladder| blood| bone| bone marrow| brain| conn	NM_030750 // Sgpp1 // sphingosine-1-phosphate phosphatase 1 // 12 C3|12 // 81535 /// EN	NM_030750	Sgpp1	205.406	105.797	1.94152	6.40444e-16	-2.2906	8.71602e-16	-2.27245	3.59923e-07	-1.46994	0.0727728	-1.12321	0.288993	-1.07008	0.298756	1.06861	3.21104e-12	1.86833	2.13978e-11	1.7925	2.37466e-12	1.8809	2.45907e-09	1.62351	2.20981e-11	1.79126	8.99794e-07	1.44364	1.15118e-11	1.8167	4.89258e-05	1.33325	0.756244	-1.01989	0.979841	-1.0018	0.90689	-1.00837	0.782906	-1.01763	0.0693538	-1.12487	0.488753	-1.05073
NM_001159284 // Mm.188516 // bladder| blood| bone| bone marrow| brain| connective tissu	NM_001159284 // Smtn // smoothelin // 11|11 A2-A3 // 29856 /// NM_013870 // Smtn // smo	NM_001159284	Smtn	587.147	227.205	2.58422	6.8773e-10	-2.29049	5.53714e-11	-2.49482	0.00215377	-1.39941	0.828371	-1.02257	0.00967379	-1.32083	0.153049	-1.1607	0.00107477	1.43519	0.375558	1.096	0.0597388	1.21934	0.828022	1.02262	0.636367	1.04994	0.051636	1.22792	0.318172	-1.10894	0.101269	-1.18725	0.00115444	-1.43151	0.974308	1.00373	0.751044	1.0374	0.697497	-1.04086	0.0289829	-1.26097	0.0354471	-1.28449
NM_001168562 // Mm.62083 // bone marrow| brain| embryonic tissue| eye| intestine| kidne	NM_001168562 // Zfp446 // zinc finger protein 446 // 7 A1|7 // 269870 /// ENSMUST000001	NM_001168562	Zfp446	171.451	131.564	1.30318	2.88842e-11	-2.28772	1.31091e-09	-2.04049	0.00166541	-1.35691	0.055507	-1.19522	0.728649	-1.03207	0.0694031	1.18375	0.838237	1.01874	0.117085	1.15579	0.0195635	1.24607	0.774273	-1.02643	0.000411979	1.4176	1.81277e-05	1.55443	6.33656e-06	1.60186	3.16622e-11	2.28127	0.363178	1.08668	0.73145	1.03571	0.75082	1.033	0.472493	-1.06774	0.0387394	1.2132	0.17659	-1.14994
ENSMUST00000052927 // Mm.485085 // bone marrow| brain| dorsal root ganglion| embryonic	ENSMUST00000052927 // Ppp1r16b // protein phosphatase 1, regulatory (inhibitor) subunit	ENSMUST00000052927	Ppp1r16b	32.4385	35.4472	0.915121	1.1793e-11	-2.28623	1.23876e-06	-1.64915	0.00977971	-1.26782	0.8196	-1.02026	0.673456	1.03778	0.0117081	1.25992	0.0244047	-1.22695	0.0780485	-1.17125	0.0261739	-1.22373	0.000905046	-1.36865	0.00933172	-1.26987	0.283183	-1.09972	0.0500217	-1.19322	0.592202	-1.04831	0.777861	-1.02512	0.50235	-1.06871	0.767856	1.0296	0.234067	-1.11135	0.782091	-1.02463	0.206113	-1.1345
ENSMUST00000026580 // Mm.334321 // bone| brain| embryonic tissue| eye| heart| inner ear	ENSMUST00000026580 // Lrdd // leucine-rich and death domain containing // 7 F5|7 // 579	ENSMUST00000026580	Lrdd	130.059	265.703	0.48949	1.57164e-12	-2.28446	8.88292e-07	-1.6057	0.104619	1.14446	0.158194	-1.12394	0.392638	-1.07272	0.462411	1.06213	0.0936041	-1.14978	0.447509	-1.0643	0.712497	1.0306	0.179537	-1.11739	3.91081e-06	-1.54629	1.20146e-05	-1.50248	9.75004e-06	-1.51056	0.000360644	-1.37346	0.0730582	-1.16137	0.390681	1.08243	0.0188107	-1.25069	0.0880238	1.15269	0.252173	-1.09899	0.234908	-1.11637
ENSMUST00000107749 // Mm.101909 // brain| dorsal root ganglion| extraembryonic tissue|	ENSMUST00000107749 // Gabbr2 // gamma-aminobutyric acid (GABA) B receptor, 2 // 4 B1|4	ENSMUST00000107749	Gabbr2	76.093	28.5859	2.66191	7.12095e-12	-2.28365	1.90695e-09	-1.94592	0.00225042	-1.32325	4.81934e-16	-3.11632	2.05846e-09	-1.94181	0.0108014	-1.25773	4.179e-11	-2.16801	1.47857e-10	-2.09069	1.38767e-08	-1.84288	2.12307e-06	-1.60977	0.122854	1.14462	0.223617	1.11173	0.519156	1.0573	0.041503	1.19788	0.867043	-1.01454	0.275532	-1.1123	0.60311	-1.05174	0.204973	-1.11673	0.252073	1.1047	0.530224	1.06284
NM_010900 // Mm.1389 // bone marrow| brain| connective tissue| embryonic tissue| eye| f	NM_010900 // Nfatc2ip // nuclear factor of activated T cells, cytoplasmic, calcineurin	NM_010900	Nfatc2ip	283	1002.1	0.282407	7.61267e-11	-2.28117	3.28543e-08	-1.89833	0.0163356	-1.26408	0.0502366	-1.20762	0.883663	1.01385	0.599653	1.05065	0.0560431	-1.20187	0.141975	-1.15021	0.214765	-1.12496	0.0332889	-1.2288	6.54459e-06	1.62579	0.277223	1.10837	0.0316032	1.23143	0.558614	1.05663	0.448633	-1.07408	0.878945	-1.01621	0.0110847	-1.32286	0.00638487	-1.30884	0.00242269	-1.35371	0.658604	-1.04782
NM_019637 // Mm.202561 // blood| bone marrow| brain| embryonic tissue| extraembryonic t	NM_019637 // Styx // serine/threonine/tyrosine interaction protein // 14 C1|14 // 56291	NM_019637	Styx	344.123	320.902	1.07236	9.34305e-08	-2.28092	0.00105196	-1.56306	8.50137e-07	-2.09047	0.728311	-1.04513	0.967137	-1.00524	0.529124	1.08341	0.480459	-1.09404	0.245211	-1.16049	0.340993	1.12932	0.604913	-1.06801	0.594169	1.07012	0.379414	1.11869	0.237125	1.16354	0.932639	-1.01079	0.123168	-1.21992	0.878114	1.02212	0.156037	1.22757	0.174995	1.19039	0.239034	1.16282	0.364415	-1.13892
NM_008701 // Mm.129420 // embryonic tissue /// ENSMUST00000072631 // Mm.129420 // embry	NM_008701 // Nkx2-9 // NK2 transcription factor related, locus 9 (Drosophila) // 12 C1|	NM_008701	Nkx2-9	170.531	116.005	1.47003	0.00015068	-2.28016	0.233424	-1.26824	0.150159	1.334	0.0653202	-1.45112	0.0644573	-1.45294	0.136996	-1.34729	0.246417	1.2599	0.19753	1.29354	0.546769	1.12677	0.128023	1.35702	0.00359998	-1.83732	0.0197702	-1.61158	0.0771457	-1.42822	0.305013	1.22638	0.959069	-1.01019	0.77329	1.06608	0.294523	-1.26414	0.112734	1.37515	0.02752	1.56765	0.973226	-1.00748
ENSMUST00000036954 // Mm.204730 // bone| bone marrow| dorsal root ganglion| embryonic t	ENSMUST00000036954 // Gbx2 // gastrulation brain homeobox 2 // 1 C5-E1|1 65.0 cM // 144	ENSMUST00000036954	Gbx2	81.8171	293.576	0.278691	3.94646e-09	-2.27897	1.08741e-07	-2.03189	0.0167975	-1.31389	0.00411091	-1.39537	0.0306647	-1.2777	0.500607	-1.07711	0.0361454	-1.2676	0.262287	-1.13234	0.173567	-1.16353	0.233991	-1.14121	8.02061e-09	-2.2232	0.878647	1.01693	0.0399834	1.26135	5.23617e-11	2.6614	7.367e-07	1.90322	1.59099e-10	-2.86955	2.28168e-07	-2.15566	0.032517	-1.27411	0.81841	-1.02558	0.00133673	1.52856
ENSMUST00000043208 // Mm.249575 // connective tissue| embryonic tissue| heart| inner ea	ENSMUST00000043208 // Six4 // sine oculis-related homeobox 4 homolog (Drosophila) // 12	ENSMUST00000043208	Six4	125.082	553.462	0.225999	5.04229e-08	-2.27587	1.64637e-06	-1.99165	0.0318363	-1.31265	7.99066e-08	-2.23597	0.00114897	-1.53548	0.552025	-1.07606	0.0433785	-1.29064	0.696755	-1.04914	0.856487	-1.02249	0.781205	-1.03477	0.0372552	1.30152	0.528708	1.08077	0.000441307	1.59862	0.197868	1.17359	0.813069	1.02952	0.825492	-1.03095	0.97197	1.00487	0.252267	1.15257	0.660305	1.05561	0.97665	-1.00405
ENSMUST00000111639 // Mm.442075 // blood| brain| embryonic tissue| eye| liver| ovary| t	ENSMUST00000111639 // Arntl2 // aryl hydrocarbon receptor nuclear translocator-like 2 /	ENSMUST00000111639	Arntl2	159.591	83.6753	1.90727	2.71693e-06	-2.27454	0.000171635	-1.86446	0.336606	-1.15703	0.766333	1.04589	0.881732	-1.0227	0.239389	1.19617	0.00037032	-1.79408	1.19147e-05	-2.12119	0.00100185	-1.70462	0.016183	-1.45772	0.0197068	-1.43996	0.0199687	-1.43876	0.563622	-1.09125	0.0155513	-1.46129	0.00397132	-1.58258	0.785167	-1.04732	0.725572	1.06137	0.336507	-1.15707	0.0322533	-1.39504	1.40837e-05	-2.30712
NM_138741 // Mm.398690 // bladder| blood| bone| bone marrow| brain| connective tissue|	NM_138741 // Sdpr // serum deprivation response // 1 C1.1|1 // 20324 /// ENSMUST0000005	NM_138741	Sdpr	24.3445	23.5582	1.03338	0.000752768	-2.27181	0.000445611	-2.36512	0.00557539	-1.93186	0.959776	1.01146	0.999045	-1.00027	0.641436	-1.11107	0.522019	1.15602	0.875414	-1.03605	0.484472	-1.17163	0.800574	1.05873	0.940015	-1.01714	0.87676	1.03565	0.824443	-1.05139	0.567832	1.13802	0.976944	1.00655	0.676808	-1.1117	0.647079	-1.12337	0.790933	-1.06173	0.8007	1.05869	0.735937	1.08942
NM_007707 // Mm.3468 // bladder| blood| bone| bone marrow| brain| dorsal root ganglion|	NM_007707 // Socs3 // suppressor of cytokine signaling 3 // 11 E2|11 // 12702 /// ENSMU	NM_007707	Socs3	249.845	232.96	1.07248	1.05505e-12	-2.27116	6.86246e-08	-1.69466	7.13525e-05	-1.42375	2.07445e-07	1.64855	5.70284e-05	1.43199	0.0532136	1.1718	0.225886	1.1028	0.698553	1.03151	0.438835	-1.06418	0.428183	-1.06574	0.00315624	-1.28435	1.18749e-06	-1.57855	0.0930683	1.14672	0.0136781	-1.22797	0.606555	-1.04215	4.36722e-06	-1.61037	0.000199962	-1.44307	0.398275	-1.07028	0.243115	-1.09883	0.824863	-1.02011
ENSMUST00000041783 // Mm.179704 // bladder| brain| embryonic tissue| eye| inner ear| jo	ENSMUST00000041783 // Iqce // IQ motif containing E // 5|5 G1 // 74239 /// NM_028833 //	ENSMUST00000041783	Iqce	85.3419	103.829	0.821944	5.16771e-08	-2.27102	7.85709e-06	-1.87399	0.0466864	-1.28488	0.0598024	-1.26687	0.906531	-1.01452	0.993934	-1.00093	0.362936	-1.11888	0.190609	1.17647	0.51929	1.08258	0.13257	-1.20616	0.131821	-1.20661	0.011316	-1.38322	0.604488	1.06579	0.860932	1.02175	0.817676	1.02872	0.237891	-1.17861	0.600529	-1.07506	0.632664	-1.06055	0.302209	1.13607	0.396032	-1.12486
ENSMUST00000026569 // Mm.41075 // brain| eye| mammary gland| pineal gland| juvenile| ad	ENSMUST00000026569 // Drd4 // dopamine receptor D4 // 7 F5|7 70.1 cM // 13491 /// NM_00	ENSMUST00000026569	Drd4	28.5451	23.4064	1.21954	1.86881e-15	-2.26969	2.91428e-07	-1.48923	0.595404	-1.03511	0.000535554	1.2753	0.00470768	1.21316	0.00971666	-1.19154	5.68298e-08	1.53924	2.57139e-05	1.35999	0.334623	-1.06498	0.0178788	1.17275	1.53064e-05	1.37455	0.303007	-1.06958	6.00208e-07	1.4677	0.540015	1.04065	0.307916	1.06885	0.912388	1.00805	0.652258	-1.03343	0.856284	1.01182	0.848637	1.01246	0.9482	1.00475
NM_020576 // Mm.34201 // skin| adult /// ENSMUST00000025273 // Mm.34201 // skin| adult	NM_020576 // Psors1c2 // psoriasis susceptibility 1 candidate 2 (human) // 17 B1|17 //	NM_020576	Psors1c2	43.6462	91.6282	0.47634	0.000631956	-2.26909	0.00786033	-1.85479	0.236152	-1.30375	0.727686	-1.08038	0.927863	1.02029	0.146281	1.3865	0.139137	-1.39494	0.460964	-1.17839	0.247249	1.29558	0.995505	-1.00125	3.23626e-06	-3.30775	0.000766486	-2.2361	0.277046	-1.2751	0.00176232	-2.09655	0.410428	-1.20133	0.687015	-1.10578	0.17911	1.40337	0.000548387	2.29351	0.0920925	1.46331	0.41056	-1.22881
NM_021447 // Mm.143796 // bone| embryonic tissue| eye| heart| joint| testis| fetus| adu	NM_021447 // Trim54 // tripartite motif-containing 54 // 5 B1|5 // 58522 /// ENSMUST000	NM_021447	Trim54	55.6525	39.3418	1.41459	1.19808e-08	-2.2683	0.0103265	-1.35969	0.117802	1.20002	7.84367e-05	-1.65362	0.0962077	-1.21451	0.384793	-1.1054	0.000484443	-1.54354	0.000215394	-1.59223	0.000322163	-1.568	0.0342064	-1.28428	0.000170834	1.60623	0.139552	1.18761	0.64053	-1.05512	0.0222356	-1.31188	0.081603	-1.22605	0.00989373	1.41539	0.0551503	1.28818	0.402383	-1.10132	0.355735	-1.11243	0.353923	-1.12769
NM_023146 // Mm.383775 // bone marrow| brain| dorsal root ganglion| embryonic tissue| e	NM_023146 // Ranbp17 // RAN binding protein 17 // 11 A5|11 // 66011 /// ENSMUST00000169	NM_023146	Ranbp17	1714.37	1220.37	1.4048	2.78915e-20	-2.26765	2.09711e-18	-2.05829	2.78083e-08	-1.37584	4.10789e-10	-1.46459	1.60817e-05	-1.25478	0.169088	1.06676	2.9686e-07	-1.32945	8.8313e-06	-1.26582	0.918733	-1.00475	0.0313118	-1.10852	8.93626e-11	1.49917	0.000339094	1.19864	1.84414e-13	1.65703	1.19834e-06	1.30297	0.327385	1.04681	0.501872	1.03575	0.986065	1.00091	0.056008	1.0951	0.391452	1.04078	0.979297	1.00135
ENSMUST00000001202 // Mm.210343 // adrenal gland| bladder| bone| bone marrow| brain| co	ENSMUST00000001202 // Ocrl // oculocerebrorenal syndrome of Lowe // X A4|X // 320634 //	ENSMUST00000001202	Ocrl	327.642	288.831	1.13437	3.06454e-10	-2.26707	1.86794e-06	-1.72899	0.00493799	-1.33838	0.968842	1.00385	0.160224	1.15028	0.587777	-1.05491	0.0137666	-1.28698	0.623704	-1.04955	0.131751	-1.16248	0.604112	-1.05245	0.000818833	1.42584	0.00340105	1.35672	0.58754	-1.05494	0.689213	-1.04019	0.817512	1.02298	0.00105549	1.47537	5.44266e-05	1.64512	0.112963	-1.17184	0.886057	1.01421	0.2955	-1.12358
NM_001135559 // Mm.3770 // bladder| bone| bone marrow| brain| embryonic tissue| extraem	NM_001135559 // Sos2 // son of sevenless homolog 2 (Drosophila) // 12 C3-D|12 30.0 cM /	NM_001135559	Sos2	831.572	246.38	3.37517	1.85637e-13	-2.26515	6.43162e-12	-2.06015	2.33059e-06	-1.51135	0.202578	-1.10164	0.221992	-1.09713	0.0744022	-1.14675	0.394524	1.06642	0.519432	1.04976	0.569109	-1.04382	0.0111544	1.2202	8.41894e-14	2.31543	4.88624e-11	1.95593	0.000764026	1.31355	0.947876	-1.00493	0.00205051	-1.27988	0.998114	-1.0002	0.000808831	1.35635	4.86599e-09	-1.7473	2.02987e-05	-1.43619	0.00725793	-1.26843
NM_001098799 // Mm.207709 // brain| embryonic tissue| eye| ovary|oocyte| fetus| neonate	NM_001098799 // Tox2 // TOX high mobility group box family member 2 // 2 H3|2 // 269389	NM_001098799	Tox2	151.884	38.6603	3.92868	8.61982e-09	-2.26515	2.19239e-10	-2.58888	0.068394	-1.23398	0.323468	-1.11871	0.958412	1.0059	0.745256	-1.03739	0.00459121	-1.40128	0.0676093	-1.23475	0.553522	1.06934	0.564847	-1.0673	0.0375845	1.27313	0.000586762	1.52163	0.324739	1.11837	0.0068052	1.37796	0.662717	-1.05054	0.20715	-1.17548	0.857387	-1.02306	0.0464099	-1.25954	0.586928	-1.06338	0.929466	1.01129
ENSMUST00000080511 // Mm.221314 // blood| embryonic tissue| prostate| organogenesis| fe	ENSMUST00000080511 // Hist1h1b // histone cluster 1, H1b // 13|13 A2-A3 // 56702 /// NM	ENSMUST00000080511	Hist1h1b	250.786	4851.79	0.0516894	1.15826e-10	-2.26213	2.39664e-07	-1.79698	0.281917	-1.1079	3.89274e-06	-1.65562	0.110995	-1.1655	0.480585	-1.06917	2.10379e-20	5.3688	2.37458e-21	5.97988	2.05803e-21	6.02345	2.69845e-19	4.76399	0.499283	1.06614	0.0149294	1.27021	0.534078	-1.06069	0.806953	-1.02337	0.313317	-1.10068	0.0178704	1.29814	0.00483817	1.37067	0.19028	1.13336	0.670769	1.04105	0.309214	-1.11485
ENSMUST00000046470 // Mm.214953 // brain| embryonic tissue| epididymis| extraembryonic	ENSMUST00000046470 // Mettl22 // methyltransferase like 22 // 16 A1|16 // 239706 /// NM	ENSMUST00000046470	Mettl22	823.98	763.027	1.07988	8.05697e-09	-2.26006	0.00118763	-1.47719	0.135486	-1.18533	0.369932	1.10647	0.147245	1.17931	0.553346	1.06896	5.72481e-05	-1.65445	0.0161403	-1.32379	0.623988	-1.05666	0.884882	1.01639	2.80062e-11	2.7811	3.45233e-08	2.14672	0.057884	1.24353	0.221512	-1.14863	0.361493	-1.10848	1.21451e-09	2.69776	1.68638e-08	2.42726	0.44132	1.09064	0.302613	-1.12358	0.112037	-1.226
ENSMUST00000020234 // Mm.4871 // adrenal gland| bladder| bone| bone marrow| brain| conn	ENSMUST00000020234 // Timp3 // tissue inhibitor of metalloproteinase 3 // 10 C1-D1|10 4	ENSMUST00000020234	Timp3	116.97	117.134	0.998597	0.000138964	-2.25935	0.294887	-1.22732	0.121885	-1.35671	0.400815	-1.17807	0.175976	-1.3046	0.217745	-1.27339	0.543544	1.1255	0.0570979	1.45971	0.00687096	1.73442	0.00222736	1.88065	0.580645	1.11346	0.884059	-1.02872	0.601171	1.10702	0.339899	-1.2049	0.131574	-1.34601	0.253749	-1.28544	0.387788	-1.20843	0.243752	-1.2565	0.106427	-1.37552	0.222754	-1.3081
NM_172739 // Mm.28646 // bladder| bone| brain| embryonic tissue| extraembryonic tissue|	NM_172739 // Grlf1 // glucocorticoid receptor DNA binding factor 1 // 7 A2|7 // 232906	NM_172739	Grlf1	478.172	415.13	1.15186	1.17133e-14	-2.25873	3.2957e-06	-1.44526	0.660858	1.03049	0.349551	-1.06644	0.905518	-1.00815	0.824581	-1.01528	0.302448	-1.07358	0.953466	1.004	0.824759	1.01526	0.70718	-1.02604	9.09529e-05	-1.34511	0.000249733	-1.31502	0.59398	-1.03719	0.227685	-1.08684	0.864212	-1.01176	0.0549984	-1.16301	0.000804405	-1.31969	0.00681896	1.21425	0.98105	-1.00163	0.341633	1.07626
NM_172693 // Mm.132246 // bone marrow| brain| embryonic tissue| eye| intestine| liver|	NM_172693 // Galnt12 // UDP-N-acetyl-alpha-D-galactosamine:polypeptide N-acetylgalactos	NM_172693	Galnt12	326.092	61.0437	5.34195	1.19865e-09	-2.25823	1.50909e-10	-2.42193	9.94552e-07	-1.81463	0.00865969	-1.32873	0.113949	-1.18085	0.872518	-1.01674	0.732137	1.03608	0.710342	-1.03921	0.359989	-1.09991	0.0269049	-1.26672	0.290582	1.11644	0.041591	1.24188	0.420056	-1.08739	0.30372	-1.1131	0.825494	-1.02308	0.225882	1.15274	0.00464872	1.41468	0.522188	-1.06865	0.934404	1.00855	0.74767	-1.03814
NM_009920 // Mm.299737 // brain| embryonic tissue| eye| intestine| mammary gland| spina	NM_009920 // Cnih2 // cornichon homolog 2 (Drosophila) // 19 A|19 // 12794 /// ENSMUST0	NM_009920	Cnih2	182.361	207.97	0.876864	1.23513e-07	-2.25806	4.65595e-08	-2.34719	0.00130986	-1.54877	0.000472848	-1.61927	0.190226	-1.18339	0.0127356	-1.39073	0.606544	-1.06778	0.0131591	1.38842	0.774776	1.03706	0.0638061	1.27247	0.37567	1.11985	0.459372	1.09899	0.0474088	1.2951	0.887003	1.01823	0.00607649	-1.44266	0.129777	-1.24564	0.0668858	1.30673	0.141122	-1.20892	0.552257	1.07867	0.00158454	-1.61925
NM_001146048 // Mm.28534 // bone marrow| brain| embryonic tissue| extraembryonic tissue	NM_001146048 // Lrrc1 // leucine rich repeat containing 1 // 9 D-E1|9 // 214345 /// ENS	NM_001146048	Lrrc1	523.211	469.695	1.11394	4.69982e-13	-2.25521	3.04096e-10	-1.90006	0.44364	-1.06113	0.141302	1.122	0.228478	1.09835	0.376816	-1.07095	0.868977	-1.01281	0.390829	1.0688	0.146422	-1.12032	0.727918	-1.02723	0.0431402	1.17384	0.0188134	1.20678	0.764452	1.0234	0.0642202	1.15723	0.0287824	-1.19015	0.119259	1.14709	0.550586	1.05324	0.755781	1.02431	0.66096	1.03447	0.0892435	-1.162
NM_207161 // Mm.35801 // bone marrow| brain| embryonic tissue| eye| heart| inner ear| k	NM_207161 // BC048355 // cDNA sequence BC048355 // 17 C|17 // 381101 /// ENSMUST0000004	NM_207161	BC048355	1810.68	1795.29	1.00857	1.13219e-15	-2.25387	7.76551e-10	-1.66063	0.0488969	-1.1364	4.21716e-12	-1.85499	5.11168e-05	-1.33136	0.54744	1.03891	3.11354e-12	-1.86746	8.56438e-09	-1.5818	0.0166317	-1.17045	4.43942e-06	-1.398	0.76011	-1.01953	0.053714	-1.13328	0.825841	1.01403	0.00959992	-1.18687	0.355566	1.06057	0.0105277	1.20915	0.163481	1.10557	0.149428	1.0969	0.230881	-1.07955	0.315213	-1.07455
AK048657 // Mm.227924 // bone marrow| brain| embryonic tissue| extraembryonic tissue| e	AK048657 // Lpin2 // lipin 2 // 17 E1.3|17 // 64898	AK048657	Lpin2	92.3258	51.7013	1.78575	2.82498e-05	-2.25344	0.00822728	-1.61152	0.0478902	-1.41912	0.501107	-1.12341	0.0270869	-1.48229	0.524525	1.11633	0.701178	1.06849	0.924993	-1.01637	0.0642259	1.38595	0.623247	1.08856	0.52436	-1.11638	0.191564	-1.25577	0.487081	1.12776	0.763714	-1.05324	0.912203	-1.0192	0.615403	-1.10243	0.695587	-1.07886	0.686512	-1.07216	0.553142	-1.10796	0.256985	-1.24795
NM_001080780 // Mm.57199 // bladder| bone marrow| brain| dorsal root ganglion| embryoni	NM_001080780 // Ret // ret proto-oncogene // 6 E3-F1|6 53.2 cM // 19713 /// ENSMUST0000	NM_001080780	Ret	88.9546	50.2158	1.77144	6.50843e-09	-2.25305	1.37616e-05	-1.72829	0.858055	-1.02002	0.477772	-1.0821	0.5914	1.0614	0.02881	-1.28389	3.94097e-05	-1.66557	0.0694141	-1.22819	0.000169429	-1.58076	0.00466784	-1.39155	0.000516651	1.51703	5.82665e-06	1.78074	0.0598314	1.23787	0.00754172	1.36378	0.0153531	-1.32195	0.659312	-1.05649	0.162028	1.19279	0.0174749	-1.31421	0.34426	-1.11115	0.0224482	-1.34183
NM_001013379 // Mm.334577 // brain| embryonic tissue| extraembryonic tissue| eye| heart	NM_001013379 // Zfp930 // zinc finger protein 930 // 8 B3.3|8 // 234358 /// ENSMUST0000	NM_001013379	Zfp930	1011.09	1095.14	0.923253	3.05273e-05	-2.25164	0.00283983	-1.73023	0.236191	-1.23004	0.0237707	-1.49917	0.177133	-1.26687	0.281346	-1.20684	0.0270241	-1.48504	0.205137	-1.24827	0.000994905	-1.84531	0.579786	-1.10086	0.821902	1.03977	0.123038	1.31164	0.725423	-1.06277	0.45579	1.13842	0.348981	-1.17721	0.866661	-1.03322	0.171576	1.30908	0.836237	1.03646	0.0932967	1.34456	0.978546	1.00525
BC071212 // Mm.27711 // bone| brain| connective tissue| embryonic tissue| extraembryoni	BC071212 // 1700037H04Rik // RIKEN cDNA 1700037H04 gene // 2|2 F3 // 67326 /// BC006041	BC071212	1700037H04Rik	375.371	443.611	0.846171	1.12588e-11	-2.25009	1.07482e-05	-1.53993	0.00969043	-1.26193	0.0589939	-1.18098	0.0976733	-1.15618	0.908729	-1.00992	0.200869	-1.11769	0.742809	-1.02867	0.755423	-1.02719	0.575228	-1.04952	0.281914	-1.0978	0.504592	-1.05929	0.231481	1.10954	0.549252	1.05302	0.768409	1.02568	0.109474	-1.17045	0.0252274	-1.25062	0.436438	1.06956	0.315277	-1.0909	0.586275	1.05415
NM_175507 // Mm.262085 // bladder| brain| embryonic tissue| eye| heart| intestine| kidn	NM_175507 // Tmem20 // transmembrane protein 20 // 19 C3|19 // 240660 /// ENSMUST000000	NM_175507	Tmem20	1181.18	897.937	1.31543	6.12457e-12	-2.2494	2.20938e-08	-1.79422	9.50809e-06	-1.53023	0.00885705	-1.25916	0.331781	-1.08566	0.0882691	-1.15744	0.000233135	-1.40354	0.0131829	-1.2426	0.0109315	-1.25044	0.000721422	-1.35937	0.171244	1.12363	0.0505627	-1.18378	0.000237269	1.40285	0.114386	-1.14459	0.329371	-1.08611	0.112638	-1.16475	0.033538	-1.23003	0.375339	1.07788	0.0517417	-1.18272	0.41724	-1.08009
NM_007854 // Mm.4930 // bladder| blood| brain| connective tissue| embryonic tissue| ext	NM_007854 // Slc29a2 // solute carrier family 29 (nucleoside transporters), member 2 //	NM_007854	Slc29a2	757.814	315.304	2.40344	1.10343e-11	-2.24413	2.4603e-09	-1.92528	0.000142019	-1.43227	0.000800059	-1.36298	0.00730061	-1.27269	0.933413	1.00719	0.0355979	-1.20373	0.0117867	-1.25242	0.942635	-1.00619	0.00183574	-1.32948	0.00024918	-1.40972	2.70578e-05	-1.49931	0.0409728	1.19728	0.154412	-1.13168	0.887788	1.01217	4.32547e-07	-1.78536	0.00968588	-1.29741	0.275434	-1.0988	0.841803	-1.01726	0.78772	-1.02629
ENSMUST00000039480 // Mm.117094 // bladder| bone| bone marrow| brain| dorsal root gangl	ENSMUST00000039480 // Zswim4 // zinc finger, SWIM domain containing 4 // 8 C3|8 // 2121	ENSMUST00000039480	Zswim4	303.776	238.402	1.27422	3.18244e-09	-2.24403	5.90744e-06	-1.74442	0.0171136	-1.30293	0.0707986	-1.21817	0.75753	1.03358	0.59626	1.05839	0.174878	-1.15814	0.461604	1.0822	0.690812	-1.04349	0.507546	1.07364	0.00117053	-1.45087	0.0589515	-1.2296	0.0885578	-1.20391	0.00260045	-1.40757	0.966684	-1.00448	0.969472	-1.00461	0.324771	1.12643	0.0429845	1.24891	0.821356	1.02445	0.765767	1.03646
NM_178886 // Mm.489740 // bone| bone marrow| brain| dorsal root ganglion| embryonic tis	NM_178886 // Ldlrad3 // low density lipoprotein receptor class A domain containing 3 //	NM_178886	Ldlrad3	196.121	528.335	0.371206	7.271e-10	-2.23895	0.0276896	-1.25608	0.631808	1.04932	2.97583e-06	-1.72209	0.445402	-1.07987	0.351884	-1.09847	0.000892984	-1.43132	0.255374	-1.12195	0.829085	-1.0219	0.0158456	-1.28587	0.862525	-1.01753	0.889379	-1.01405	0.400905	-1.08834	0.0132341	-1.29531	0.311105	1.10771	0.0229265	1.30375	0.0577265	1.24484	0.798488	1.02595	0.0539081	-1.21911	0.535371	-1.07255
ENSMUST00000022051 // Mm.45506 // bladder| brain| connective tissue| embryonic tissue|	ENSMUST00000022051 // Nkd2 // naked cuticle 2 homolog (Drosophila) // 13 C1|13 // 72293	ENSMUST00000022051	Nkd2	41.8177	108.798	0.384361	2.44748e-08	-2.23787	1.38032e-08	-2.28537	1.55243e-06	-1.9249	2.49166e-06	-1.89216	0.000245638	-1.59565	0.0166564	-1.33595	0.12554	-1.1987	0.235151	-1.14981	0.224587	-1.15357	0.000292043	-1.585	2.38603e-10	2.66043	1.33807e-12	3.26853	0.283607	1.13413	0.0789316	1.23228	0.00366396	-1.43039	6.96469e-14	4.35564	6.71206e-10	2.8726	1.2515e-05	1.78403	0.733074	1.04057	0.00400202	-1.48874
NM_008216 // Mm.5148 // brain| connective tissue| embryonic tissue| eye| liver| lung| m	NM_008216 // Has2 // hyaluronan synthase 2 // 15 D1|15 31.2 cM // 15117 /// ENSMUST0000	NM_008216	Has2	32.6739	198.402	0.164686	0.00711251	-2.23751	0.0191587	-1.99922	0.0251272	-1.93524	0.853258	-1.0542	0.716025	-1.10946	0.727586	-1.10457	0.979596	1.00732	0.892097	1.03946	0.642503	-1.14182	0.831842	1.06247	0.225989	1.41727	0.424343	1.25718	0.000488509	-2.94045	0.00326822	-2.43134	0.000270195	-3.11169	0.00136194	3.00046	0.174674	1.55326	0.206421	-1.43939	0.0161742	-2.03939	0.00071168	-3.22476
---	NM_001127189 // Gm13157 // predicted gene 13157 // 4 E2|4 // 100041677 /// ENSMUST00000	NM_001127189	Gm13157	824.972	1178.63	0.699939	2.39295e-09	-2.23664	8.75374e-10	-2.31413	0.000239814	-1.52626	0.134473	-1.17327	0.690524	1.04283	0.778427	-1.03006	0.000270524	-1.51985	0.12946	-1.17579	5.04173e-05	-1.60997	0.0944932	-1.19623	9.59805e-06	-1.70155	0.0103868	-1.32516	0.550639	-1.06496	0.0654756	1.21915	0.0013144	1.43615	4.62368e-05	-1.71319	0.117119	-1.20713	0.860922	1.01861	0.000810128	1.46176	0.000450754	1.56857
NM_001177832 // Mm.390595 // embryonic tissue| blastocyst| organogenesis /// NM_0011778	NM_001177832 // Gm10324 // predicted gene 10324 // 13 B3|13 // 628709 /// NM_001177832	NM_001177832	Gm10324	804.901	3053.61	0.26359	6.33614e-08	-2.23433	0.00432451	-1.44178	0.762568	-1.03742	0.363671	-1.11737	0.0147568	-1.36083	0.268846	-1.14504	0.00130759	-1.51933	0.000506623	-1.58078	0.0142656	-1.3631	0.045426	-1.28347	0.012716	-1.37078	0.00225675	-1.48401	0.407176	1.10647	0.299335	1.13543	0.371371	1.11538	0.0483759	-1.3185	0.0452565	-1.32399	0.675805	-1.05219	0.680107	1.05144	0.550295	-1.08518
NM_020498 // Mm.358339 // lung| pancreas| adult /// NM_020498 // Mm.484815 // pancreas|	NM_020498 // Ly6i // lymphocyte antigen 6 complex, locus I // 15 D3|15 // 57248 /// ENS	NM_020498	Ly6i	28.9896	22.7941	1.2718	1.24454e-06	-2.2331	4.87869e-07	-2.32675	2.27639e-07	-2.4059	0.17181	-1.21569	0.0301284	-1.37132	0.878442	-1.02184	0.968455	-1.0056	0.0310819	-1.36869	0.560342	-1.0859	0.305841	-1.15672	0.548085	1.08873	0.64674	1.06695	0.601916	-1.07658	0.770426	1.04209	0.422133	-1.12056	0.486601	-1.1171	0.51105	-1.11023	0.320815	-1.15153	0.998264	1.00031	0.926583	1.01473
ENSMUST00000066890 // Mm.458654 // bone marrow| brain| embryonic tissue| liver| nasopha	ENSMUST00000066890 // Kcnn2 // potassium intermediate/small conductance calcium-activat	ENSMUST00000066890	Kcnn2	33.51	52.1462	0.642616	8.06143e-09	-2.23302	1.96859e-07	-1.99889	0.000207309	-1.56793	2.92535e-06	-1.82176	0.0202726	-1.30467	0.17957	-1.16204	0.00335873	-1.4096	0.369762	-1.10486	0.000149141	-1.58681	0.0277077	-1.28572	0.00561674	1.38009	0.0905084	1.21015	0.538703	1.07054	0.736749	1.03791	0.257044	-1.13474	0.256494	1.1528	0.224257	1.16472	0.125514	-1.18774	0.580097	-1.06323	0.138674	-1.20521
NM_170673 // Mm.65597 // brain| embryonic tissue| eye| ovary| spinal cord|oocyte| blast	NM_170673 // Cpne9 // copine family member IX // 6 E3|6 // 211232 /// ENSMUST0000004120	NM_170673	Cpne9	32.1935	108.811	0.295867	2.12736e-08	-2.23201	3.70806e-07	-2.01366	8.74746e-08	-2.12086	0.587754	-1.06468	0.990431	-1.00138	0.977318	-1.00329	0.63984	-1.05556	0.913465	1.01262	0.911861	-1.01286	0.768046	-1.03464	8.91643e-05	-1.65053	0.794982	-1.03045	0.000138115	-1.62365	0.0174972	-1.32915	0.882644	-1.01718	0.578254	1.0749	0.0264066	1.34625	0.663391	1.05157	0.969511	1.00442	0.669532	-1.05697
NM_026892 // Mm.28753 // bone marrow| brain| embryonic tissue| extraembryonic tissue| e	NM_026892 // Eif1b // eukaryotic translation initiation factor 1B // 9 F4|9 // 68969 //	NM_026892	Eif1b	833.119	1349.49	0.617358	2.96031e-12	-2.22981	2.99916e-10	-1.96442	0.0007571	-1.34258	0.893348	-1.01094	0.098367	1.14625	0.769641	-1.02405	9.05104e-06	-1.5088	0.0506797	-1.17649	6.5971e-08	-1.70858	3.24968e-05	-1.46016	0.000605095	1.35094	0.00618968	1.26278	0.0350928	-1.19243	0.328112	1.0831	0.58308	1.04563	5.48637e-06	1.61035	0.13935	1.14645	0.665256	1.03577	0.818058	1.01884	0.381914	1.08339
NM_019392 // Mm.2901 // brain| dorsal root ganglion| embryonic tissue| extraembryonic t	NM_019392 // Tyro3 // TYRO3 protein tyrosine kinase 3 // 2 F|2 67.1 cM // 22174 /// ENS	NM_019392	Tyro3	92.1135	170.032	0.541743	2.18808e-10	-2.22958	1.54004e-06	-1.70754	0.271748	1.11116	0.00906726	-1.2965	0.167417	-1.14225	0.951982	-1.00575	0.108774	-1.16787	0.643267	-1.04512	0.453854	1.07415	0.610034	1.04981	0.0521249	-1.20853	0.0357224	-1.22836	0.265184	-1.1128	0.00637008	-1.3134	0.389909	-1.08568	0.1182	-1.18497	0.164197	1.16255	0.138059	-1.15391	0.771014	1.0281	0.201031	-1.14817
NM_009851 // Mm.423621 // bladder| blood| bone| bone marrow| brain| connective tissue|	NM_009851 // Cd44 // CD44 antigen // 2 E2|2 56.0 cM // 12505 /// ENSMUST00000005218 //	NM_009851	Cd44	268.744	54.532	4.92819	0.000181337	-2.22905	0.001925	-1.90506	0.00254778	-1.86806	0.310312	1.22038	0.585832	1.11233	0.982719	1.00423	0.659715	-1.08977	0.352272	-1.2001	0.480099	-1.14814	0.359589	-1.19677	0.410935	-1.17473	0.524808	-1.13239	0.00570775	-1.76263	0.0257497	-1.5671	0.130099	-1.34933	0.721065	1.08144	0.301116	1.25626	0.718823	-1.07279	0.412634	1.17404	0.846596	-1.04331
NM_021387 // Mm.150675 // brain| eye| prostate| fetus| neonate| adult /// ENSMUST000000	NM_021387 // Vstm2b // V-set and transmembrane domain containing 2B // 7 B3|7 // 58188	NM_021387	Vstm2b	75.9651	50.7924	1.4956	1.67408e-07	-2.22848	3.97704e-06	-1.96651	0.00172412	-1.52888	0.202329	-1.17769	0.15155	-1.20261	0.294915	-1.14328	3.06937e-07	-2.17578	6.11161e-07	-2.11748	2.0684e-06	-2.01804	7.67594e-09	-2.51938	0.000370068	1.63518	0.0562864	1.28163	5.09765e-05	1.77546	2.46464e-06	2.00411	0.475748	1.09508	0.442457	-1.11624	0.893157	-1.01934	0.930294	-1.01117	0.00110281	1.55964	0.453198	1.11335
NM_053173 // Mm.258953 // bone| bone marrow| brain| embryonic tissue| eye| fertilized o	NM_053173 // Kifc5b // kinesin family member C5B // 17 A3.3|17 // 16580 /// ENSMUST0000	NM_053173	Kifc5b	63.5974	73.5667	0.864487	5.9184e-05	-2.22784	0.0225202	-1.52593	0.981949	1.00406	0.617989	-1.09354	0.0919637	-1.35976	0.054812	1.42215	0.468652	-1.13903	0.0356311	-1.4728	0.164834	1.28634	0.338233	-1.18823	0.705674	1.07002	0.266091	-1.22226	0.0812401	1.3749	0.54966	-1.11333	0.669877	1.07941	0.100233	1.40005	0.433081	1.17154	0.0620882	1.4073	0.972737	1.00614	0.402577	-1.18428
ENSMUST00000040865 // Mm.27682 // bone| bone marrow| brain| embryonic tissue| extraembr	ENSMUST00000040865 // Tmem98 // transmembrane protein 98 // 11 B5|11 // 103743 /// NM_0	ENSMUST00000040865	Tmem98	208.706	110.248	1.89306	8.74859e-06	-2.22568	1.02271e-05	-2.20856	0.00340554	-1.62905	0.387318	1.14659	0.0401154	1.39408	0.0788819	1.32622	0.000721908	-1.77604	0.0035263	-1.62577	0.00497728	-1.59334	0.00083316	-1.76233	0.000892339	1.75577	0.00033877	1.84906	0.136291	-1.26871	0.0630299	-1.34906	0.0945816	-1.30745	4.59404e-10	4.2543	3.37253e-07	2.93991	0.00237877	1.66284	0.869858	1.02614	0.0261056	-1.50166
NM_016960 // Mm.116739 // mammary gland| testis| thymus| juvenile /// NM_001159738 // M	NM_016960 // Ccl20 // chemokine (C-C motif) ligand 20 // 1 C5|1 52.0 cM // 20297 /// NM	NM_016960	Ccl20	28.3268	25.145	1.12654	3.06869e-07	-2.22458	2.29716e-05	-1.86563	0.0552873	1.29214	0.0879414	-1.25489	0.0444166	-1.30926	0.234455	-1.1696	0.385671	-1.12054	0.0543865	-1.29344	0.0847752	-1.25789	0.43526	-1.10768	0.536721	-1.08421	0.761845	-1.04038	0.365686	-1.12606	0.573202	-1.07648	0.960521	-1.00648	0.404452	1.13072	1.15191e-06	2.31202	0.799436	1.03374	9.86231e-07	2.1217	0.691576	-1.05999
NM_138682 // Mm.443660 // brain| embryonic tissue| eye| fertilized ovum| lung| zygote|	NM_138682 // Lrrc4 // leucine rich repeat containing 4 // 6 A3.3|6 // 192198 /// ENSMUS	NM_138682	Lrrc4	30.9866	22.1757	1.39732	6.14449e-11	-2.22453	1.36388e-07	-1.77931	0.000189415	-1.44799	0.105267	-1.16056	0.0906024	-1.1686	0.791921	-1.02414	0.192814	1.12636	0.428593	1.07447	0.507478	1.0619	0.987842	-1.00138	0.933452	-1.00757	0.205949	1.12242	0.296713	-1.09962	0.163506	1.136	0.211478	-1.12083	0.102289	1.18389	0.490945	1.07267	0.157009	1.13833	0.154545	1.13924	0.517541	-1.06811
---	NR_002860 // A130040M12Rik // RIKEN cDNA A130040M12 gene // 11 C|11 // 319269 /// NR_00	NR_002860	A130040M12Rik	232.423	53.7711	4.32245	0.0177902	-2.2229	0.0245078	-2.12818	0.0102177	-2.39013	0.0831458	1.77542	0.00916446	2.42349	0.272422	1.43239	0.00031415	3.58347	1.38747e-05	4.97036	0.00475975	2.62873	0.000321541	3.57445	0.957246	-1.01757	0.705723	-1.13064	0.88494	-1.04814	0.139048	-1.62822	0.147458	-1.61134	0.597396	-1.21305	0.957952	-1.01943	0.985134	-1.00607	0.607265	-1.18207	0.477093	-1.29742
ENSMUST00000026408 // Mm.299218 // brain| mammary gland| fetus| adult /// NM_010272 //	ENSMUST00000026408 // Gdf11 // growth differentiation factor 11 // 10 D3|10 // 14561 //	ENSMUST00000026408	Gdf11	105.879	41.7635	2.53521	7.04007e-06	-2.22212	0.00518959	-1.57825	0.042198	-1.38217	0.00360049	1.61188	0.267245	1.18937	0.109622	1.28694	0.427804	-1.13141	0.709648	1.05949	0.606071	1.0834	0.0176388	-1.46499	4.71962e-08	2.82972	2.5502e-11	4.12862	6.67468e-11	3.92652	1.66655e-13	5.43505	0.375413	1.14815	0.000759238	-1.88242	0.0451148	-1.43102	0.00973013	-1.5203	0.207754	-1.21821	0.889393	1.02453
NM_178778 // Mm.204836 // brain| dorsal root ganglion| embryonic tissue| eye| kidney| l	NM_178778 // Scai // suppressor of cancer cell invasion // 2 B|2 // 320271 /// ENSMUST0	NM_178778	Scai	184.406	247.71	0.744441	5.39442e-10	-2.22095	2.59608e-10	-2.27367	2.06965e-05	-1.60314	0.765972	1.02966	0.166169	1.14749	0.553722	1.05997	0.000441055	-1.45408	0.0108766	-1.29795	0.00234425	-1.37359	0.0341952	-1.23863	0.269336	1.11545	0.0489057	1.21923	0.796582	-1.02563	0.863153	1.01706	0.441793	-1.07871	0.442323	1.08876	0.538743	1.07031	0.806544	-1.02433	0.37302	-1.09185	0.648811	-1.05157
ENSMUST00000174064 // Mm.305152 // adrenal gland| bone| bone marrow| brain| connective	ENSMUST00000174064 // Apoe // apolipoprotein E // 7 A3|7 4.0 cM // 11816 /// NM_009696	ENSMUST00000174064	Apoe	110.936	542.376	0.204537	5.58544e-05	-2.22086	0.00223435	-1.78156	0.444868	-1.1459	0.0649977	-1.39801	0.131272	-1.31258	0.641705	1.08627	0.514064	1.12322	0.998609	-1.00031	0.719095	1.06601	0.548948	-1.11258	0.000118156	2.12735	0.52347	1.1203	0.000171751	2.08164	0.680718	1.07589	0.353814	1.18008	0.000643192	2.08695	0.591966	1.1131	0.00977145	1.61513	0.347291	-1.18277	0.729746	-1.07142
NM_009806 // Mm.327591 // adipose tissue| bone| brain| connective tissue| dorsal root g	NM_009806 // Cask // calcium/calmodulin-dependent serine protein kinase (MAGUK family)	NM_009806	Cask	108.194	391.984	0.276017	3.81526e-06	-2.2201	0.000319632	-1.79653	0.0268713	-1.40681	0.0307735	-1.39455	0.506633	-1.10457	0.797793	-1.03902	0.0100751	-1.49388	0.330897	-1.15731	0.0117446	-1.48041	0.00725296	-1.52266	0.504642	1.10509	0.434847	-1.12422	0.0446678	-1.36049	0.0496509	-1.3507	0.838273	1.03096	0.182476	1.25396	0.143319	1.28278	0.347805	-1.15144	0.479481	1.11176	0.672818	1.07352
NM_027193 // Mm.5915 // blood| bone marrow| brain| embryonic tissue| extraembryonic tis	NM_027193 // Dph5 // DPH5 homolog (S. cerevisiae) // 3 G1|3 // 69740 /// ENSMUST0000004	NM_027193	Dph5	436.561	241.303	1.80918	4.69512e-12	-2.21737	8.53925e-11	-2.04532	0.0590257	-1.17146	0.00109979	-1.33217	0.342828	-1.08127	0.765382	1.02475	0.423991	-1.06795	0.365671	1.07732	0.210233	-1.10922	0.252179	-1.09919	0.170232	1.12041	0.0516811	1.17743	0.508061	1.05586	0.154692	1.12534	0.23208	-1.10382	0.0163077	1.25802	0.00203634	1.35294	0.169294	1.12069	0.0180915	1.22237	0.0979301	-1.16768
ENSMUST00000034830 // Mm.34797 // brain| embryonic tissue| eye| inner ear| kidney| lung	ENSMUST00000034830 // Crabp1 // cellular retinoic acid binding protein I // 9 A5.3|9 31	ENSMUST00000034830	Crabp1	320.768	435.084	0.737254	2.94139e-09	-2.21508	0.258776	-1.12682	0.647723	1.04915	1.23238e-07	1.95802	1.34072e-05	1.67982	0.000442379	1.49171	9.75479e-07	-1.83034	1.49907e-08	-2.09826	1.97095e-09	-2.24505	2.13918e-11	-2.62489	8.16527e-12	-2.71714	0.0319252	-1.26091	0.00016195	-1.54486	0.00302142	-1.39034	0.335503	1.10694	3.85761e-05	-1.72173	0.947073	1.00785	0.583126	1.05936	0.610183	-1.05501	0.24581	1.14791
ENSMUST00000162022 // Mm.223508 // bone| embryonic tissue| kidney| mammary gland| ovary	ENSMUST00000162022 // Glis3 // GLIS family zinc finger 3 // 19 C1|19 // 226075 /// NM_1	ENSMUST00000162022	Glis3	113.345	42.4805	2.66816	7.18605e-08	-2.21094	3.53573e-07	-2.0825	0.611211	-1.06336	0.784959	1.03348	0.0298428	1.31034	0.251879	1.14961	0.373678	1.11392	0.00113998	1.52355	0.000608197	1.56384	0.299578	1.13432	0.00322471	1.45689	0.528654	-1.07919	0.0698353	1.25041	0.0533097	-1.26985	0.110352	-1.21635	0.616975	-1.07027	0.624169	1.06878	0.220437	-1.16101	0.837759	-1.02502	0.361384	-1.13247
[truncated: 26,070 more rows]
