# Supplementary material for: A Resource for the Transcriptional Signature of Bona Fide Trophoblast Stem Cells and Analysis of Their Embryonic Persistence
Source: Stem Cells Int. 2015 Dec 14;2015:218518. doi: 10.1155/2015/218518 (PMC4691490; doi:10.1155/2015/218518)
Supplement: Supplementary file 1 — Supplementary Table S1: List of antibodies used for immunofluorescence and western blotting at indicated dilutions. Supplementary Table S2: List of primers used for qPCR and to generate in situ riboprobes. Restriction sites attached to the primers to ensure directed cloning of the PCR product are underlined. Supplementary Table S3: Gene expression array data sets. Supplementary Table S4: Gene groups of Venn diagram intersections. [file 218518.f1.zip › 218518.f1/Supplementary_Table_S4_SCI_1416412.xlsx]

## Sheet: Venn diagram intersections
Figure 4B) TSC differentiation vs. Eomes LOF vs. Median expression TSC/ESC								Figure 4C) TSC differentiation vs. Cdx2 overexpression vs. Median expression TSC/ESC								Figure 4D) Eomes overexpression vs. Cdx2 overexpression vs. Median expression TSC/ESC
group A	group B	group C	group D	group E	group F	group G		group H	group I	group J	group K	group L	group M	group N		group O	group P	group Q	group R	group S	group T	group U
Bmp4	Prkaa2	Serpinb9e	Socs2	Ly6a	Tph1	Duox2		Socs2	Tmprss2	Serpinb9e	Zic2	Duox2	Morc4	Ly6a		Fgf5	Tmprss2	Serpinb9e	Mef2b	Clic5	Morc4	Eomes
Etv5	Epha2	Xist	Dusp6	Gdf6	Ubash3b	Duoxa2		Dusp6	Hoxb9	Xist	Zic5	Duoxa2	Pla2g7	Inpp1		BC090627	Hoxb9	Xist	Bhlhe41	Dram1	Cdx2	Nxf7
Ccdc3	Nrarp	H19	Nr0b1	Bves	Sema7a	Il5ra		Nr0b1	Blnk	Hand1	Prss50	Il5ra	Slc44a3	Bves		Tmem154	Blnk	Cldn26	Cubn		Pla2g7
Sox2	Ttc9	Hand1	Prss46	Gm1673	Efnb2	Cyp26a1		Prss46	P2rx4	AI836003	Fbp2	Cyp26a1	Emp2	Gm1673		Gm17266	P2rx4	Hand1	Gm5091		Slc44a3
Spry4	Acot3	AI836003	Zic2	Nat8l	Fv1	Inpp1		Bmp4	Plagl1	Xlr5a	Tbx18	Gdf6	Eps8l2	Nat8l		Tmprss13	Plagl1	Gdf6	Srgn		Popdc3
Prl5a1	Gabbr2	Xlr5a	Fermt1	Apln	Dram1	Cldn26		Etv5	Hoxa9	Rbm20	Stac2	Cldn26	H19	Apln		Slc9a7	Hoxa9	AI836003	Fam100b		Emp2
Tm6sf1	6330407J23Rik	Rbm20	D430041D05Rik	Adamts7	Emp2	Htr5b		Ccdc3	Tmem211	Prl2c2	Dusp4	Htr5b	Dsc2	Hs3st3b1		Ddx60	Tmem211	Xlr5a	Gm364		Bves
Prex2	Rwdd2a	Prl2c2	Zic3	A330050F15Rik		Tmem181c-ps		Sox2	Cabp7	Itga7	D130040H23Rik	Adamts7	Igf2	Eomes		Susd1	Cabp7	Tmem181c-ps	Slc17a9		Eps8l2
Spry2	Tmem181b-ps	Itga7	Zic5	Hs3st3b1		Eomes		Spry4	Pof1b	Tns4	Amph	A330050F15Rik	Capn6	Cdx2		C330018A13Rik	Pof1b	Rbm20	Tfec		H19
Sema5b	Zyg11a	Nxf7	C77370	Rgs5		Trim9		Prl5a1	Afap1	Slco2a1	O3far1	Tmem181c-ps	Afap1l1	Popdc3		4930447C04Rik	Afap1	Duoxa2	Taf9b		Dsc2
Ddah1	Trnt1	Morc4	Etv4	Ttc39c		Fgfr4		Tm6sf1	Mef2b	Cyp11a1	Nnt	Rgs5	Msx2	Pth1r		Myb	Hoxc6	Prl2c2	Boll		Igf2
Pgap1	Six2	Tns4	Ehd3	Cdx2		Zfp382		Prex2	Hoxc6	Heg1	Bambi	Trim9	Nxf7	Gpnmb		P2rx7	Greb1	Itga7	Klb		Capn6
Lrrn4	Tiam1	Slco2a1	Prodh	Popdc3		Sox21		Spry2	Greb1	Kdr	Mpped2	Ttc39c	Ctdspl	Ly6g		Car14	Vldlr	Tns4	Slc25a31		Ly6g
Spred1	Als2cl	Cyp11a1	Kcnab3	Mmp9		Elf5		Fermt1	Vldlr	Scarf2	Ssbp2	Mmp9	Scn1b	Elf5		Nkd2	Rnf128	Slco2a1	Slc40a1		Afap1l1
Npcd	Sept3	Acpp	Hdgfrp3	Pth1r		Nlrc3		Sema5b	Rnf128	Rhox4e	Sp4	Slc16a5	Bhmt2	Cpm		Ly6g6c	Nupr1	Cyp11a1	Zdhhc9		Msx2
Tspan2	Akap17b	Heg1	Prps1	Slc16a5		Ppp2r2c		Ddah1	Nupr1	Tinagl1	Smad6	4833419F23Rik	Gpr126			Tmem98	Zfp36l3	Heg1	Fam129a		Gm1673
Slmo1	Igfbp3	Kdr	Bok	4833419F23Rik				D430041D05Rik	Zfp36l3	Xlr5b	Cxcl14	Sh3pxd2b	Igf2as			1700123I01Rik	Xpnpep2	Kdr	Ott		Ly6a
St6gal1	Gabrb3	Scarf2	B830017H08Rik	Sh3pxd2b				Zic3	Xpnpep2	Dkkl1	Usp27x	Fgfr4	Pdzrn3			Ebi3	Nat1	Scarf2	Gm15107		Ctdspl
Gmpr	Rps20	Rhox4e	Cth	Meis1				Pgap1	Nat1	C430049B03Rik	Epb4.1l3	Zfp382	Pparg			Otx2	S100a13	Rhox4e	Snora62		Scn1b
Prss50	Nefl	Tinagl1	Kcnk13	Gpnmb				Lrrn4	S100a13	Nppb	Dcaf12l1	Sox21	Rassf8			9430069I07Rik	Hoxa7	Tinagl1	Gm5634		Bhmt2
Fbp2	Pdxk	Xlr5b	Mest	Ly6g				Spred1	Hoxa7	Cdh5	Gpx3	Meis1	Gata2			4921507P07Rik	Cacna2d2	Xlr5b	Hpgd		Hs3st3b1
Tbx18	Mir1949	Dkkl1	Pcsk6	Map3k8				C77370	Cacna2d2	Sema7a	Slc40a1	Map3k8	Satb2			Nrcam	Gdpd1	Dkkl1	Apoe		Gpr126
Esrrb	Gnai1	3830417A13Rik	Scmh1	Lcp1				Npcd	Gdpd1	B3gnt3	Rbp4	Nlrc3	Acpp			Prkcb	Mira	C430049B03Rik	Nostrin		Igf2as
Mir453	B4galnt3	C430049B03Rik	Fam124a	Cd83				Tspan2	Mira	Papss2	Smad7	Lcp1	Fignl2			Nefl	Aldh1b1	Nppb	Slc15a2		Apln
Stac2	Alox12	Nppb	Fam81a	Cpm				Slmo1	Aldh1b1	Serpinb9d	Zdhhc9	Cd83	Dhrs9			Stx3	Pcsk1	Cdh5	Flywch2		Pdzrn3
Rps6ka2	Serpinb8	Cdh5	Sp4	Ccdc85b				St6gal1	Pcsk1	Antxr2	Ppap2b	Ppp2r2c	Rab6b			Stk39	Slc6a1	Sema7a	LOC100862646		Nat8l
Ptgs2	Slc29a4	B3gnt3	Hipk2					Gmpr	Slc6a1	Rhox4a	Spry1	Ccdc85b	Mgat4b			Ucma	Sh2d4a	B3gnt3	Cd55		Pth1r
Stard8	Adcyap1r1	Papss2	Robo4					Esrrb	Sh2d4a	Dysf	Plekhg3		Cobll1			Aass	Pgam2	Papss2	Nxnl2		Pparg
Bcl2l11	Relt	Serpinb9d	Myef2					Mir453	Pgam2	Serpine1	Slitrk4		Sync			Ctsw	Dact1	Serpinb9d	Gm15127		Rassf8
Foxh1	Gpr39	Antxr2	Ntf3					Rps6ka2	Dact1	Serpinb9f	Abr		3830417A13Rik			Snap25	Sccpdh	Antxr2			Cpm
Klf14	Ccnb1ip1	Rhox4a	Ninl					Ptgs2	Sccpdh	Sema3f			Nrk			Kctd12b	Tmem171	Rhox4a			Gpnmb
Bgn	Gm4636	Dysf	Asphd2					Stard8	Bhlhe41	Itgb3			Gm9			Pard6a	8030474K03Rik	Dysf			Gata2
Acsl6	Mapk8ip2	Serpine1	Slc4a11					Bcl2l11	Hpgd	S1pr1			Bcl9l			Rgnef	Pdpn	Rgs5			Satb2
Lrp11	Notch4	Igf2as	Depdc1a					Foxh1	Tmem171	Gata3			1600029D21Rik			Nrip3	Car8	Lcp1			Acpp
Phlda1	Sox3	Serpinb9f	Prkar2a					Klf14	8030474K03Rik	Col4a1			Irx3			Snord73a	Dct	Serpine1			Fignl2
Zfp820	Prkd1	Sema3f	Lrp12					Bgn	Pdpn	Procr						Gm128	2900055J20Rik	Adamts7			Inpp1
Dusp4	Cysltr1	Itgb3	Sesn3					Acsl6	Car8	Slc5a5						Parp12	Zbtb10	Serpinb9f			Dhrs9
9130008F23Rik	Ctbp2	S1pr1						Lrp11	Dct	Irf2						Ch25h	Bcl6	Sema3f			Rab6b
Lama3	Eif2s2	Gata3						Etv4	2900055J20Rik	Col4a2						Plbd1	Dmrt3	Itgb3			Mgat4b
D130040H23Rik	Ap1s3	Col4a1						Phlda1	Zbtb10	Ifih1						Slc38a3	Slc2a12	S1pr1			Cobll1
Ccnjl	Gclc	Irx3						Zfp820	Bcl6	Shroom1						Cyp2j13	Dmrt1	Gata3			Sync
Itga1	Foxm1	Capn6						Ehd3	Dmrt3	Arhgap31						Gm129	Vegfa	Col4a1			3830417A13Rik
Lox	Crebzf	Procr						9130008F23Rik	Slc2a12	Rhox4g						D730003I15Rik	Pmp22	Procr			Nrk
Vim	Dnmt3l	Slc5a5						Lama3	Dmrt1	Elf4						Rad21l	Ripply3	Slc5a5			Elf5
Amph	1700102H20Rik	Gm9						Ccnjl	Fam129a	Fam89a						Glp1r	Taf7l	Irf2			Gm9
Btbd11	Zfp599	Irf2						Itga1	Vegfa	Rps13						Rhov	Lhpp	Col4a2			Bcl9l
Zc3h7b	Adarb1	Afap1l1						Prodh	Pmp22	Bmp1						Mesp2	Zic2	Mmp9			1600029D21Rik
O3far1	Elovl4	Col4a2						Kcnab3	Ripply3	Mfsd2a						Soat2	Tox3	Ifih1			Irx3
Nnt	Tmem47	Gata2						Lox	Taf7l	Cmtm5						1700019A02Rik	Atp12a	Shroom1
Tdrd5	Fitm2	Ifih1						Vim	Lhpp	1200009I06Rik						Ccdc141	Hsf5	Arhgap31
Trim24	Khdrbs3	Shroom1						Btbd11	Tox3	Rhox4c						S1pr3	Sox6	Rhox4g
AF357425	Nasp	Arhgap31						Zc3h7b	Atp12a	Igfbp4						Mustn1	Rassf4	Elf4
Bambi	Pkia	Rhox4g						Hdgfrp3	Hsf5	Plac1						Zfp799	Camkk2	Fam89a
Mpped2	Dcbld1	Sync						Tdrd5	Sox6	Man1a						Ndufa7	Atf5	Rps13
Rnf149	Nrp2	Elf4						Trim24	Rassf4	Pygl						Amhr2	Plat	Meis1
Prrg1	BC048355	Fam89a						AF357425	Camkk2	Irs3						Mal2	Dusp4	Bmp1
Thbs1	Anp32e	Rps13						Rnf149	Atf5	Aebp1						Cd79b	Epx	Mfsd2a
1700024P16Rik	Cox7c	Bmp1						Prrg1	Plat	Serpinb6b						Gng2	Atg16l2	Cmtm5
Fam118a	Slc43a3	1600029D21Rik						Thbs1	Epx	Lrrc32						AW209491	Insl6	Il5ra
Foxe1	Deptor	Mfsd2a						1700024P16Rik	Atg16l2	Rin3						Wdr17	Adh1	1200009I06Rik
Atp7b	Gemin6	Cmtm5						Fam118a	Insl6	Pdgfb						Tsku	F3	Htr5b
Gas6	Fmr1	1200009I06Rik						Prps1	Adh1	Serpinb9c						Gm17580	Igsf1	Rhox4c
Cd59a	Ube2c	Rhox4c						Bok	F3	Ubash3b						Fetub	Sgce	Igfbp4
Cd300a	Tcfl5	Igfbp4						Foxe1	Igsf1	Qpct						Cacna1b	Ifngr2	Plac1
Acta2	Thop1	Igf2						Atp7b	Sgce	DXBay18						2410080I02Rik	Gabra3	Man1a
Ssbp2	Csrnp2	Plac1						Gas6	Ifngr2	Mlkl						Rnf135	Srgap1	Pygl
Lphn1	Gm9897	Man1a						B830017H08Rik	Gabra3	Ctla2b						Rab25	Kctd16	Irs3
Sh3bgrl	Hells	Pygl						Cd59a	Srgap1	Gsn						Lpar2	Clcn5	Aebp1
Il23a	Mir3096b	Irs3						Cd300a	Kctd16	Zfp703						Zfp819	Fbp2	Duox2
Rgs16	Lrrc4b	Aebp1						Acta2	Gm5091	Plcxd2						Pde10a	Slc24a5	Serpinb6b
Cacng7	Dchs1	Msx2						Cth	Clcn5	Man1c1						Caps2	Gab2	A330050F15Rik
Mylip	Zfp953	Gpr126						Lphn1	Slc24a5	Fhl2						Lpin3	Thsd4	Lrrc32
Igfbp7	Mdn1	Serpinb6b						Sh3bgrl	Gab2	Crim1						Notch4	Chst8	Rin3
Cdc14b	Esco2	Lrrc32						Kcnk13	Thsd4	Mir466n						Treml2	Acsf2	Ccdc85b
Egr1	Fam118b	Rin3						Mest	Chst8	Galns						Rasa4	Dmgdh	Pdgfb
Sorl1	Galnt14	Pdgfb						Il23a	Acsf2	Parp4						Klhl6	Sema3e	Serpinb9c
C330008G21Rik	2210418O10Rik	Serpinb9c						Rgs16	Dmgdh	Lipg						Calca	Magi3	Ubash3b
Ccnd1	Fbn1	Ctdspl						Cacng7	Sema3e	3110070M22Rik						Habp2	Spry1	Qpct
Cerk	Mpzl2	Qpct						Pcsk6	Magi3	Flnc						Rmnd1	Gstm5	DXBay18
P2ry2	Troap	DXBay18						Mylip	Gstm5	St3gal1						Celsr3	Cldn3	Mlkl
2010002N04Rik	Nbeal2	Mlkl						Igfbp7	Cldn3	Bmp8b						Dbp	Pgc	Ctla2b
Cdh2	Ecel1	Ctla2b						Cdc14b	Pgc	Rps11						Lmcd1	Mtm1	Gsn
Slc2a5	Rpl17	Slc44a3						Scmh1	Mtm1	Clip2						Nudt13	2810459M11Rik	Zfp703
Nipal4	Mrpl51	Gsn						Egr1	2810459M11Rik	Bmp8a						Tspyl4	Tmem144	4833419F23Rik
Sh2d3c	Hmgn5	Zfp703						Sorl1	Tmem144	Sema4c						Gpr151	Oas1f	Plcxd2
Efna1	9430008C03Rik	Plcxd2						Fam124a	Oas1f	Tbx15						Nos3	Agpat9	Man1c1
Atp8b1	Elavl2	Man1c1						C330008G21Rik	Agpat9	Arfip1						Abcc2	Gulp1	Ppp2r2c
Tanc1	Ndufs6	Fhl2						Ccnd1	Gulp1	Tnfrsf1a						D030056L22Rik	Fbxo27	Fhl2
Ldhb	Zfp39	Crim1						Cerk	Fbxo27	Maml3						Olfml1	Aqp3	Cyp26a1
Ctsf	Sord	Mir466n						P2ry2	Aqp3	Adam8						B3gntl1	Csf2ra	Crim1
Slc43a1	Necab2	Cobll1						2010002N04Rik	Csf2ra	Cda						Dnajb3	Abca4	Mir466n
Traf3ip1	Trim54	Galns						Fam81a	Abca4	Il2rg						Rnf11	Lrrc15	Sh3pxd2b
Ube2l6	2810417H13Rik	Parp4						Cdh2	Lrrc15	Tgm2						Gm10863	Cib2	Galns
Paip1	Eogt	Lipg						Slc2a5	Cib2	Gatm						Mir3088	Hoxc8	Parp4
Smad6	Dtx4	3110070M22Rik						Hipk2	Hoxc8	Tnfaip2						Pigw	Mall	Lipg
2010317E24Rik	Gm17296	Flnc						Nipal4	Mall	Anxa1						Lypd5	5730469M10Rik	3110070M22Rik
2210019I11Rik	Phgdh	St3gal1						Sh2d3c	5730469M10Rik	Xylt1						Eif2s3y	Hsdl1	Flnc
Meg3	Eif1ax	Bmp8b						Efna1	Hsdl1	Zfpm1						Fgf15	Fstl1	St3gal1
Prss42	Sall3	Rps11						Atp8b1	Fstl1	Zbtb38						Mixl1	D5Ertd605e	Bmp8b
Atrx	Kif5c	Clip2						Tanc1	D5Ertd605e	Nbl1						Xrcc4	Scamp1	Rps11
Clip3	Lhfpl5	Bmp8a						Robo4	Fam100b	Tbx20						Gm3908	Gm13119	Clip2
Bcl6b	Ttbk1	Sema4c						Ldhb	Scamp1	Osmr						Mon1b	C130073F10Rik	Bmp8a
Runx1	4930572J05Rik	Tbx15						Ctsf	Gm13119	Fgd6						1700007G11Rik	Peg3	Sema4c
Rspo1	Ttyh3	Arfip1						Slc43a1	C130073F10Rik	Snx33						Dab2	Mllt3	Tbx15
Hpcal4	Ggnbp1	Tnfrsf1a						Traf3ip1	Peg3	Sepn1						C330002G04Rik	Gsx2	Arfip1
Ttpa	Hmmr	Maml3						Ube2l6	Mllt3	Fxyd5						Sigmar1	Stc2	Tnfrsf1a
Cxcl14	Nrg1	Adam8						Paip1	Gsx2	Wnt7b						Nbea	Fam57a	Maml3
Usp27x	Tcf19	Cda						2010317E24Rik	Stc2	Chrnb1						Psmg3	2210409E12Rik	Adam8
Ndrg2	Slc4a7	Il2rg						Myef2	Fam57a	Htra1						Mir3068	Fam101b	Cda
Rsph3a	4933407K13Rik	Tgm2						2210019I11Rik	2210409E12Rik	Tph1						Kirrel2	Usp51	Il2rg
Elovl6	Nefh	Gatm						Meg3	Fam101b	Zfp9						4732471J01Rik	Epb4.1l3	Tgm2
H3f3b	Nkrf	Tnfaip2						Prss42	Usp51	4831426I19Rik						1600027N09Rik	Stard10	Gatm
Rasa4	Lingo3	Anxa1						Atrx	Stard10	Krt19						Sfrp4	Rin2	Tnfaip2
Epb4.1l3	LOC100862317	Xylt1						Clip3	Rin2	Nfatc1						Pipox	Gpr85	Anxa1
Slc6a3	Dlgap1	Zfpm1						Bcl6b	Gpr85	Mir5123							Greb1l	Xylt1
Zfp365	Dgkk	Zbtb38						Runx1	Greb1l	Marveld2							Dcaf12l1	Zfpm1
Efna3	Bard1	Nbl1						Rspo1	Siah2	Ly96							Siah2	Zbtb38
Matn2	Atad5	Tbx20						Hpcal4	Sorbs1	Prl2a1							Sorbs1	Nbl1
Sema5a	Pigw	Osmr						Ttpa	Abca7	Csf1r							Abca7	Tbx20
Tnfaip8l1	Chek1	Fgd6						Ntf3	Gm11545	Dram1							Gm11545	Osmr
Insm1	Cisd2	Snx33						Ndrg2	Rnf103	Clic5							Rnf103	Fgd6
Fbln2	Zfp72	Sepn1						Rsph3a	4933439C10Rik	Rsph3b							4933439C10Rik	Snx33
Galnt10	Nes	Fxyd5						Elovl6	Ildr1	Prss12							Ildr1	Sepn1
Ppm1k	Zbtb32	Wnt7b						H3f3b	Cpne2	Krt18							Cpne2	Fxyd5
Nfkb1	Zik1	Chrnb1						Rasa4	Mapk13	Esd							Mapk13	Wnt7b
Fam71f1	5730590G19Rik	Htra1						Ninl	Sct	Tgfbr2							Sct	Sox21
Gcnt2	Nqo1	Zfp9						Slc6a3	Ott	Meig1							Foxq1	Chrnb1
Cecr2	Usp54	4831426I19Rik						Zfp365	Gm364	Adra2b							Grasp	Htra1
Dcaf12l1	Chn2	Krt19						Efna3	Foxq1	Arhgap10							Gm428	Tph1
Cdyl2		Nfatc1						Asphd2	Grasp	Metrnl							Heca	Zfp9
Irf1		Mir5123						Matn2	Gm428	S100a11							Slc36a4	4831426I19Rik
Atg9b		Marveld2						Sema5a	Heca	Fv1							Smpdl3a	Krt19
Pbx3		Ly96						Tnfaip8l1	Slc36a4	Loxl4							Aqp9	Nfatc1
Rian		Prl2a1						Insm1	Smpdl3a	Tgfbr3							Ankrd33b	Mir5123
Gpx3		Rab6b						Fbln2	Aqp9	Ube2ql1							Gdf11	Marveld2
Mapk4		Csf1r						Galnt10	Ankrd33b	Cbx4							Myl3	Ly96
Atf7ip2		Mgat4b						Ppm1k	Gdf11	Creb3l2							Abca5	Prl2a1
Hace1		Clic5						Nfkb1	Myl3	Plaur							Tmem56	Map3k8
Zfp964		Rsph3b						Fam71f1	Abca5	Anxa2							Micu1	Csf1r
Cntfr		Rassf8						Gcnt2	Tmem56	Kctd1							Hoxb8	Rsph3b
Duox1		Prss12						Cecr2	Micu1	Ifi35							Ccdc152	Prss12
Apcdd1		Krt18						Cdyl2	Hoxb8	Slc16a13							Pdzk1	Trim9
Oscp1		Esd						Irf1	Ccdc152	Vgf							Adm2	Krt18
Slc40a1		Tgfbr2						Atg9b	Pdzk1	Fos							Crym	Esd
Tbc1d2b		Meig1						Pbx3	Adm2	H2-T22							Dsg2	Tgfbr2
Spred2		Adra2b						Rian	Gm15107	Prl3d3							Hist1h2ba	Meig1
Rbp4		Arhgap10						Mapk4	Crym	Lrrfip1							Frs3	Adra2b
Cnksr3		Metrnl						Slc4a11	Slc15a2	Prox1							Rbp4	Arhgap10
Sept6		S100a11						Atf7ip2	Dsg2	1600025M17Rik							Plekhg3	Metrnl
Alox5		Loxl4						Hace1	Hist1h2ba	Ptprn							Gm13871	S100a11
1810020D17Rik		Tgfbr3						Zfp964	Frs3	Prkce							Cldn9	Fv1
Nbea		Ube2ql1						Cntfr	Gm13871	Fndc3b							LOC433944	Loxl4
Steap1		Cbx4						Duox1	Cldn9	Gnao1							Psd3	Tgfbr3
Parp8		Creb3l2						Apcdd1	LOC433944	Mir669h							Ccl27b	Ube2ql1
Cenpm		Plaur						Oscp1	Psd3	Anxa3							Mlf1	Cbx4
Ifitm3		Satb2						Tbc1d2b	Ccl27b	C1qtnf6							Ybx2	Creb3l2
Fgd1		Anxa2						Spred2	Mlf1	Krt8							Xlr3c	Plaur
2610318N02Rik		Kctd1						Cnksr3	Ybx2	Dnase1l1							Ren1	Fgfr4
Abat		Ifi35						Sept6	Xlr3c	Ldlrap1							Lonrf1	Anxa2
Cep55		Slc16a13						Alox5	Ren1	Ankrd1							Rgs22	Kctd1
Fyn		Vgf						1810020D17Rik	Lonrf1	Krt7							Zdhhc2	Ifi35
Smad7		Fos						Nbea	Rgs22	Slc25a24							Ppap2b	Slc16a13
Il17rd		H2-T22						Steap1	Zdhhc2	Unc5b							Gm11837	Vgf
Lass6		Prl3d3						Parp8	Gm11837	Mir669g							Nedd9	Fos
Zfp704		Lrrfip1						Cenpm	Slc25a31	Samd4							Nfatc4	H2-T22
Nova1		Prox1						Ifitm3	Nedd9	Specc1							Map3k10	Prl3d3
Itpr1		1600025M17Rik						Fgd1	Nfatc4	Fads3							Bach1	Lrrfip1
Arhgef40		Scn1b						2610318N02Rik	Boll	Bin1							Gstm1	Prox1
Bcat1		Ptprn						Abat	Map3k10	Lgi3							Phf19	Slc16a5
Pde9a		Prkce						Cep55	Bach1	Lrrn4cl							C330013F16Rik	1600025M17Rik
Aard		Fndc3b						Fyn	Gstm1	Ppapdc1b							Rell1	Ptprn
Pde7a		Gnao1						Il17rd	Phf19	Snx9							Aspa	Prkce
Zdhhc9		Mir669h						Lass6	C330013F16Rik	Mir669a-3							Limk2	Fndc3b
Ppap2b		Anxa3						Zfp704	Rell1	Lyn							Gnal	Gnao1
Hap1		Dsc2						Depdc1a	Aspa	Frmpd1							0610011F06Rik	Mir669h
Ttc26		C1qtnf6						Nova1	Limk2	Flt1							Zfp800	Anxa3
Kif21b		Krt8						Itpr1	Gnal	Itpkb							Gm4302	C1qtnf6
Kif27		Dnase1l1						Arhgef40	0610011F06Rik	Sept4							Ptpn13	Krt8
Spry1		Ldlrap1						Bcat1	Zfp800	Gdpd3							Hrk	Dnase1l1
Plcb4		Ankrd1						Pde9a	Gm4302	Efnb2							2610035F20Rik	Ldlrap1
H1fx		Krt7						Aard	Ptpn13	Galnt12							Pyy	Ankrd1
Hmga2		Slc25a24						Pde7a	Klb	Tshz1							Gm15114	Zfp382
Plekhg3		Unc5b						Hap1	Hrk	Stx11							Eif2s2	Krt7
Pecam1		Mir669g						Prkar2a	2610035F20Rik	Prl7a1							Zfy1	Slc25a24
Eml5		Samd4						Ttc26	Pyy	Kcnk6							Cpeb2	Unc5b
Axl		Specc1						Kif21b	Gm15114	Gm8615							Sepp1	Mir669g
Robo1		Fads3						Kif27	Eif2s2	Gchfr							Cacna2d1	Samd4
Slitrk4		Bin1						Plcb4	Zfy1	Pdlim2							Ms4a4d	Specc1
Plcg1		Lgi3						H1fx	Cpeb2	Anxa5							Rab12	Fads3
Chac1		Pla2g7						Hmga2	Sepp1	Stk10							Prss50	Bin1
Tmem64		Lrrn4cl						Pecam1	Cacna2d1	Rnf144b							Otud1	Lgi3
C1ql4		Ppapdc1b						Eml5	Ms4a4d	Fbxl8							Slco4c1	Lrrn4cl
Ap1s2		Snx9						Axl	Taf9b	Cdkn1c							Lpl	Ppapdc1b
Gm807		Mir669a-3						Robo1	Slc17a9	Dusp18							Chn1	Snx9
Traf3ip2		Lyn						Plcg1	Rab12	Adcy7							Aqp8	Mir669a-3
Rbpms2		Frmpd1						Chac1	Otud1	Lxn							Zcchc12	Lyn
A2ld1		Flt1						Tmem64	Slco4c1	Mtmr11							Pramel1	Frmpd1
Duoxa1		Itpkb						C1ql4	Lpl	Itgav							Esx1	Flt1
Lbh		Pdzrn3						Ap1s2	Chn1	Pwwp2b							Eml1	Itpkb
Tmem59l		Sept4						Gm807	Aqp8	Prkcdbp							Rhof	Sept4
Spred3		Gdpd3						Traf3ip2	Zcchc12	Entpd3							Ssbp2	Gdpd3
Gm10685		Galnt12						Rbpms2	Pramel1	Slc39a2							Otud6a	Efnb2
LOC100861570		Tshz1						A2ld1	Esx1	Cd82							Tigd2	Galnt12
Mmp1b		Bhmt2						Duoxa1	Eml1	Cbfa2t3							Hoxc9	Tshz1
Tnc		Stx11						Lbh	Rhof	Mbnl2							Dmrtc1c1	Stx11
Fam55c		Prl7a1						Tmem59l	Otud6a	Rhou							Slc16a7	Prl7a1
Slc46a3		Kcnk6						Spred3	Tigd2	Mir4660							Bmp2k	Kcnk6
Mir29a		Gm8615						Gm10685	Gm5634	Cpeb4							Igdcc3	Ttc39c
B4galt6		Gchfr						LOC100861570	Hoxc9	Tap1							Gprc5a	Gm8615
Clstn1		Pdlim2						Mmp1b	Dmrtc1c1	Perp							Ahnak	Gchfr
Mapk12		Anxa5						Tnc	Slc16a7	Stap2							Cntln	Pdlim2
Morn2		Eps8l2						Fam55c	Bmp2k	Gmip							Neurog1	Anxa5
G3bp2		Stk10						Slc46a3	Igdcc3	Fosl2							Il10rb	Cd83
AF357355		Rnf144b						Mir29a	Gprc5a	Vdr							Ralgds	Stk10
H2afy2		Fbxl8						B4galt6	Ahnak	Mboat1							Zdhhc23	Rnf144b
Pde3b		Cdkn1c						Clstn1	Cntln	Rusc2							Zic5	Fbxl8
Oxct1		Dusp18						Mapk12	Gm15127	Hgsnat							Sowahc	Cdkn1c
Abr		Adcy7						Morn2	Neurog1	Myof							Ebf4	Dusp18
Asph		Lxn						Lrp12	Il10rb	Sema6b							Id2	Adcy7
Ctgf		Mtmr11						G3bp2	Ralgds	Arhgef5							9430020K01Rik	Lxn
Pip5kl1		Itgav						AF357355	Zdhhc23	Lats2							Rhox13	Mtmr11
		Pwwp2b						H2afy2	Sowahc	Cd44							Gss	Itgav
		Prkcdbp						Pde3b	Ebf4	Slc30a4							Scrn1	Pwwp2b
		Entpd3						Sesn3	Id2								Trpm6	Prkcdbp
		Slc39a2						Oxct1	9430020K01Rik								Shisa2	Entpd3
		Cd82						Asph	Rhox13								St7	Slc39a2
		Dhrs9						Ctgf	Gss								Mtmr7	Cd82
		Cbfa2t3						Pip5kl1	Scrn1								Zfp618	Nlrc3
		Mbnl2							Trpm6								Mpp1	Cbfa2t3
		Rhou							Shisa2								Acsl3	Mbnl2
		Mir4660							St7								Urgcp	Rhou
		Cpeb4							Mtmr7								Tmlhe	Mir4660
		Tap1							Zfp618								Hip1	Cpeb4
		Pparg							Mpp1								Rhox6	Tap1
		Bcl9l							Acsl3								Rspo3	Perp
		Perp							Urgcp								Zw10	Stap2
		Stap2							Tmlhe								AU022751	Gmip
		Gmip							Hip1								Hist1h2bn	Fosl2
		Fosl2							Rhox6								Rims1	Vdr
		Fignl2							Rspo3								Nt5dc3	Mboat1
		Vdr							Zw10								Car12	Rusc2
		Nrk							AU022751								Lass2	Hgsnat
		Mboat1							Hist1h2bn								Odz3	Myof
		Rusc2							Rims1								F11r	Sema6b
		Hgsnat							Nt5dc3								Arid5a	Arhgef5
		Myof							Car12								Tbx3	Lats2
		Sema6b							Apoe								Cib1	Cd44
		Arhgef5							Lass2								B3galnt1	Slc30a4
		Lats2							Odz3								Stxbp6
		Cd44							F11r								Slc25a20
		Slc30a4							Arid5a								Gpx3
									Tbx3								Rragd
									Cib1								Tpbg
									B3galnt1								Wbscr27
									Stxbp6								Clcn4-2
									Slc25a20								AF529169
									Rragd								Ceacam10
									Tpbg								Tanc2
									Wbscr27								Jam3
									Clcn4-2								Gata6
									AF529169								Lonrf3
									Ceacam10								Zc3hav1l
									Tanc2								Smad6
									Jam3								Vmn2r11
									Gata6								Snx7
									Lonrf3								Spry3
									Zc3hav1l								Parm1
									Nxnl2								Sp4
									Vmn2r11								Igf1
									Snx7								Pik3cb
									Spry3								Ypel2
									Parm1								AU015836
									Igf1								Art1
									Pik3cb								Sycp2
									Ypel2								Gm15091
									AU015836								Hoxd4
									Art1								Lclat1
									Sycp2								Oplah
									Srgn								Tbx18
									Gm15091								1700048O20Rik
									Hoxd4								Rgs7
									Lclat1								2610528A11Rik
									Oplah								Tfap2c
									1700048O20Rik								Snora75
									Rgs7								Ddx25
									2610528A11Rik								Pgm5
									Tfap2c								Sycp1
									Snora75								Hoxd8
									Ddx25								4933427D06Rik
									Pgm5								Rhox5
									Sycp1								Gem
									Hoxd8								Ptgir
									4933427D06Rik								Tekt5
									Rhox5								Pan3
									Gem								Enpp1
									Ptgir								Nnt
									Tekt5								Tmtc2
									Pan3								Atn1
									Enpp1								Lgals2
									Tmtc2								2300009A05Rik
									Atn1								Fbxo21
									Lgals2								Abr
									2300009A05Rik								N4bp2
									Fbxo21								Wdr72
									N4bp2								Tnfrsf1b
									Wdr72								2810011L19Rik
									Tnfrsf1b								Apbb1
									2810011L19Rik								Apoa2
									Apbb1								Rel
									Tfec								D930016D06Rik
									Nostrin								Tusc3
									Apoa2								Pou6f2
									Flywch2								Smad7
									Snora62								Zfp711
									Rel								Ttc9b
									D930016D06Rik								Gm15097
									Tusc3								Usp27x
									Pou6f2								AI593442
									Zfp711								Hoxb7
									Ttc9b								Ptprz1
									Gm15097								Snord38a
									AI593442								Mob3b
									Hoxb7								Sgpp1
									Ptprz1								Htr5a
									Snord38a								Inpp5k
									Mob3b								Sgpp2
									Sgpp1								O3far1
									Htr5a								Ndrg1
									Inpp5k								Usp29
									Sgpp2								Art5
									Ndrg1								Wnt5a
									Usp29								Hhip
									Art5								Hoxa10
									Wnt5a								LOC100861738
									Cd55								Plb1
									Hhip								Lrp2
									Hoxa10								Hkdc1
									LOC100861738								Lin7a
									Plb1								Stac2
									Lrp2								Slc45a4
									Hkdc1								Arhgap21
									Lin7a								Mbd6
									Slc45a4								Mpped2
									Arhgap21								Tmem50b
									Mbd6								Rlbp1
									Tmem50b								Rcor3
									Rlbp1								Trpv3
									Rcor3								Amph
									Trpv3								Myzap
									Myzap								Mctp1
									Mctp1								Cxcl14
									Rtn1								Rtn1
									Plcd1								Plcd1
									LOC100862646								Npr3
									Npr3								Bambi
									Snord116								Snord116
									Prkcq								Prkcq
									Plcxd3								Plcxd3
									Gpr125								Gpr125
									Tex101								Tex101
									Kctd15								Kctd15
									Erbb3								Erbb3
									Hoxa11								Hoxa11
									Taar4								Taar4
									Foxi3								Foxi3
									Fam184a								Fam184a
									Nat2								Nat2
									Dock8								Dock8
									Dppa3								Dppa3
									Vstm2b								Vstm2b
									Krr1								Krr1
									Arhgap42								Arhgap42
									Peg10								Peg10
									Mfsd1								Mfsd1
									Rcor1								Rcor1
									Eda								Eda
									Rap1gap2								Rap1gap2
									BC061212								BC061212
									Plekhf1								Plekhf1
									Mmp17								Mmp17
									Ak4								Ak4
									Slc6a11								Slc6a11
									Hdx								Hdx
									Cubn								Bcorl1
									Bcorl1								Gm3286
									Gm3286								D130040H23Rik
									LOC384199								LOC384199
									Ttyh2								Ttyh2
									Slc33a1								Slitrk4
									Gm9429								Slc33a1
									Slc4a1								Gm9429
									Kcnj12								Slc4a1
									9030625A04Rik								Kcnj12
									4930502E18Rik								9030625A04Rik
									Mtif3								4930502E18Rik
									Atoh1								Mtif3
									Leprel1								Atoh1
									Hoxd11								Leprel1
									Traf1								Hoxd11
									Slc46a1								Traf1
									Snx32								Slc46a1
									Kcnv2								Snx32
									Sh3tc1								Kcnv2
									Atg13								Sh3tc1
									Dll1								Atg13
									2310014L17Rik								Dll1
									Fmo1								2310014L17Rik
									Hmgn5								Fmo1
									A830025M08								Hmgn5
									Serpinb1a								A830025M08
									A730020M07Rik								Serpinb1a
									Slc27a4								A730020M07Rik
									Tm4sf4								Slc27a4
									Fam173a								Tm4sf4
									L1Md-Gf21								Fam173a
									Avpi1								L1Md-Gf21
									Pomgnt1								Avpi1
									Hoxd9								Pomgnt1
																	Hoxd9
